# Supplementary material for: Anti-inflammatory effects of recreational marijuana in virally suppressed youth with HIV-1 are reversed by use of tobacco products in combination with marijuana
Source: Retrovirology. 2022 May 31;19:10. doi: 10.1186/s12977-022-00594-4 (PMC9151353; doi:10.1186/s12977-022-00594-4)
Supplement: Supplementary file 2 — Additional file 2. Log2 expression values of top 40% DEG used in hierarchical clustering analysis in Figure S1. [file 12977_2022_594_MOESM2_ESM.xlsx]

## Sheet: Additional file 2_Yin L et al_2
Additional file 2: Log2 expression values of top 40% DEG used in Hierarchical Clustering Analysis in Figure S1.
ProbeID	Gene Symbol	Reference	Reference	Reference	Reference	Reference	Reference	Reference	Reference	Reference	Reference	Reference	Reference	Reference	Reference	Reference	Reference	Reference	Reference	Reference	Reference	Reference	Reference	Reference	Reference	Reference	Group I	Group I	Group I	Group I	Group I	Group I	Group I	Group I	Group I	Group II	Group II	Group II	Group II	Group II	Group II	Group II	Group II	Group III	Group III	Group III	Group III	Group III	Group III
		HC0001	HC0003	HC0005	HC0010	HC0015	HC0016	HC0017	HC0020	HC0022	HC0026	HC0029	HC0033	HC0034	HC0038	HC0039	HC0040	HC0041	HC0042	HC0043	HC0046	HC0049	HC0051	HC0052	HC0054	HC0056	HC0002	HC0006	HC0007	HC0008	HC0012	HC0014	HC0030	HC0037	HC0053	40186	70181	70314	100016	110445	130178	160041	620002	20148	20155	40107	50372	50412	100199
213353_at	ABCA5	4.331	3.95	5.136	5.608	5.381	6.883	4.331	5.539	5.244	6.36	4.901	3.546	4.43	4.709	5.257	5.402	4.971	6.048	5.678	4.181	5.605	5.503	4.856	3.842	3.475	4.673	5.172	4.499	4.175	2.984	4.271	5.052	5.652	5.099	7.087	5.618	5.74	6.076	6.13	5.47	4.2	6.321	3.023	4.187	5.556	6.21	5.939	4.869
241705_at	ABCA5	2.681	2.162	3.132	2.508	2.369	2.436	2.331	2.322	2.288	2.666	2.103	2.195	2.291	3.488	1.877	2.856	2.409	2.464	2.514	2.383	1.912	2.436	2.154	2.386	2.404	2.674	2.309	2.115	2.094	2.77	2.337	1.698	2.539	2.894	2.954	2.715	2.489	2.613	2.162	2.492	2.742	2.443	1.793	2.917	2.114	3.719	2.476	2.512
209993_at	ABCB1	3.008	3.781	4.762	4.373	3.858	3.579	3.461	4.394	4.652	4.948	3.841	3.883	3.872	3.784	4.066	4.61	4.278	4.886	4.298	3.312	4.237	3.726	4.222	3.651	3.499	4.351	4.821	3.526	3.834	3.453	3.47	4.104	3.389	4.344	4.28	3.947	4.661	2.897	5.282	3.912	3.259	4.59	3.22	4.05	4.404	4.097	4.084	4.077
223320_s_at	ABCB10	4.937	5.171	6.565	5.384	5.934	6.853	5.819	6.155	5.601	6.524	7.02	4.354	5.486	5.348	6.397	5.888	6.115	6.37	6.528	5.438	5.776	6.094	6.104	5.135	5.414	6.823	6.229	5.347	5.818	4.551	4.697	6.442	4.4	5.553	6.96	6.333	6.57	6.712	6.232	6.434	4.935	7.205	4.424	5.896	6.787	6.796	6.888	6.569
1554918_a_at	ABCC4	3.131	3.903	4.28	4.104	4.148	3.223	3.581	4.234	4.422	4.554	2.915	4.771	3.848	3.854	3.072	5.218	4.64	4.038	4.001	3.304	4.64	3.088	3.78	3.78	3.352	3.319	4.36	3.88	3.549	2.92	3.557	3.757	3.656	3.195	3.703	3.815	4.756	3.848	3.906	3.827	4.232	3.331	4.203	5.177	3.77	5.261	6.56	4.632
1555039_a_at	ABCC4	2.758	2.59	2.809	2.883	2.774	2.609	2.435	2.928	2.896	3.234	2.801	3.74	2.632	3.228	2.374	3.671	3.35	2.773	2.887	2.509	3.395	2.469	2.186	2.962	2.685	2.782	2.914	2.996	2.936	2.353	2.254	2.802	2.428	2.935	2.87	2.692	3.792	2.756	3.092	2.786	3.316	2.56	2.962	3.475	3.032	4.138	4.514	3.667
203196_at	ABCC4	4.031	5.577	5.606	6.009	6.12	5.367	5.032	5.484	5.689	5.682	5.679	5.536	4.946	4.868	5.438	5.874	5.24	5.795	5.556	4.731	5.869	5.555	5.288	4.279	4.996	5.192	5.462	5.593	5.168	4.567	4.635	5.548	4.588	4.515	5.904	5.617	5.933	5.754	5.69	5.741	5.285	5.406	4.464	6.115	5.513	6.401	6.862	6.166
243928_s_at	ABCC4	2.34	2.782	2.655	2.404	2.859	2.395	2.593	2.486	2.442	2.41	2.5	3.136	2.262	2.47	2.495	3.033	2.621	2.565	2.773	2.388	2.405	2.003	2.22	2.803	2.567	2.539	2.753	2.338	2.245	2.48	2.685	2.543	2.675	2.436	2.42	2.638	2.631	2.555	2.272	2.559	2.707	2.382	2.557	3.535	2.346	3.23	2.588	3.148
1558460_at	ABCC5	2.979	2.865	2.911	3.094	3.56	2.583	2.501	2.943	2.966	3.101	3.07	3.685	2.909	2.748	2.969	3.129	3.105	2.892	2.673	3.116	3.148	2.953	2.819	3.123	2.863	2.83	2.801	2.594	2.958	3.191	2.943	2.832	2.79	2.537	2.599	2.764	2.856	2.664	2.689	3.17	2.689	3.006	3.085	3.469	2.861	3.891	3.65	3.075
207583_at	ABCD2	1.757	2.217	2.053	2.361	2.179	2.303	2.272	2.376	2.306	2.394	2.537	1.619	1.867	1.884	1.796	2.334	2.262	2.231	2.001	1.99	2.102	1.787	1.952	1.837	2.306	2.622	1.784	2.339	1.979	1.704	1.72	1.971	2.074	1.798	4.268	2.326	2.686	1.969	3.296	2.423	2.362	2.471	1.931	2.247	2.39	2.821	2.902	2.33
1554878_a_at	ABCD3	2.567	2.834	3.189	2.531	2.859	2.323	2.432	2.869	2.918	3.197	2.557	2.583	2.373	2.393	3.258	3.162	2.482	3.717	2.702	2.668	2.785	2.919	2.792	2.778	2.842	3.219	3.029	2.531	2.465	2.705	2.556	2.358	2.305	3.171	2.883	2.737	3.243	2.468	2.986	3.031	3.301	3.116	2.485	2.799	3.124	3.412	2.632	2.939
201872_s_at	ABCE1	4.488	5.223	5.866	5.69	5.678	6.706	5.321	6.136	5.694	6.747	6.741	4.357	5.565	5.799	6.074	6.3	5.554	6.029	5.864	5.204	6.196	5.422	5.746	4.865	5.839	6.783	5.921	5.328	5.103	5.02	4.954	5.793	4.829	5.907	6.985	6.2	6.479	6.035	6.799	5.919	4.866	6.508	5.007	5.795	5.775	6.579	6.311	5.903
211113_s_at	ABCG1	7.598	5.569	5.978	6.047	5.383	5.472	6.759	5.488	6.026	5.279	5.76	6.793	5.686	5.323	6.635	5.706	6.335	5.846	6.574	5.723	6.11	5.48	6.364	6.063	5.998	6.476	5.672	5.914	6.297	5.618	5.682	6.567	5.893	6.791	5.012	5.695	5.484	5.368	5.273	5.242	5.652	5.447	6.374	5.425	5.523	4.914	5.258	5.987
230913_at	ABCG1	7.403	5.688	5.932	5.798	5.222	6.357	7.075	5.636	6.125	5.372	5.773	6.894	6.07	4.802	6.412	5.36	6.121	5.63	6.567	5.659	6.043	5.574	6.469	5.721	5.98	6.678	5.308	6.75	6.282	5.613	5.399	7.186	5.576	5.944	5.649	5.758	5.352	5.396	4.822	5.299	4.315	6.033	5.597	4.901	5.557	5.258	5.906	5.847
232081_at	ABCG1	6.903	5.164	5.323	6.246	5.195	5.445	6.98	5.696	5.897	4.849	4.786	6.131	5.604	4.828	6.313	5.127	5.969	4.936	6.331	5.304	5.178	5.515	6.127	5.761	6.032	5.796	5.425	5.615	5.622	4.501	5.295	6.504	6.086	6.756	5.572	5.747	4.893	5.188	4.54	5.176	4.762	5.468	5.946	4.558	5.442	4.519	5.519	5.701
222697_s_at	ABHD10	3.648	4.206	4.443	4.477	4.093	5.596	4.446	4.742	4.796	5.391	5.582	4.459	4.377	4.316	5.157	4.705	4.595	4.849	4.54	4.583	5.144	5.031	4.274	4.116	4.582	5.1	4.667	4.577	4.545	4.66	4.177	4.322	3.965	4.8	5.618	4.768	5.223	5.329	5.421	5.339	4.571	5.136	4.449	4.379	4.626	5.868	4.951	5.122
234993_at	ABHD13	2.518	3.019	3.257	3.5	3.329	4.209	3.361	3.534	2.781	4.152	3.941	2.824	3.226	3.638	3.521	3.684	4.016	4.121	4.381	3.413	3.427	3.106	2.917	2.892	3.268	3.965	3.093	3.097	3.249	3.263	2.467	3.762	2.84	3.629	4.331	3.528	3.812	3.621	4.143	3.38	2.992	4.004	2.056	3.252	3.673	3.523	3.623	3.123
235348_at	ABHD13	3.592	4.034	4.473	4.389	3.68	5.537	3.974	4.268	3.826	5.507	5.269	3.04	4.315	3.523	4.106	4.161	4.564	4.564	4.676	4.025	4.457	4.378	3.898	3.496	4.287	5.667	4.709	4	4.365	3.649	3.74	4.867	3.192	4.199	5.366	4.56	4.75	4.987	5.042	4.705	3.687	5.643	2.721	3.7	4.78	4.676	4.8	4.297
87100_at	ABHD2	4.424	3.627	3.939	4.585	3.456	3.155	3.757	4.142	3.456	3.914	3.716	4.586	3.808	3.948	3.723	4.015	4.234	3.743	3.816	3.299	3.997	3.579	3.797	3.946	3.59	4.089	3.715	4.146	4.194	3.633	3.564	3.179	3.746	3.806	3.462	3.769	4.112	3.738	4.111	3.605	4.102	3.096	3.793	3.539	4.003	3.007	3.468	3.784
213805_at	ABHD5	9.106	8.714	8.021	8.331	6.94	7.457	8.005	8.227	7.98	8.461	8.235	8.419	8.824	7.932	7.652	7.196	8.557	7.84	8.669	7.645	7.977	6.901	7.687	7.974	7.693	8.397	8.892	8.319	8.564	6.765	6.46	7.597	8.073	8.626	7.576	7.303	7.029	6.027	6.46	5.54	7.585	6.505	6.073	7.685	7.62	6.823	6.1	7.83
213935_at	ABHD5	6.087	5.187	4.809	5.245	4.721	5.504	5.254	5.328	4.739	5.556	5.313	5.73	5.581	4.597	4.81	4.875	6.074	4.575	5.783	4.955	5.769	4.507	4.761	4.748	4.646	5.247	5.559	5.314	5.774	4.35	4.342	5.678	3.674	5.377	5.249	5.305	4.4	5.341	4.309	4.614	5.128	5.067	4.437	4.568	5.316	4.084	4.9	4.767
232862_at	ABHD5	6.229	3.262	3.425	3.704	3.547	3.434	4.109	3.778	3	3.116	3.088	5.48	3.821	4.577	3.394	3.478	5.128	2.563	4.563	3.74	4.445	2.516	3.826	3.664	4.546	4.076	3.019	3.637	5.215	4.959	5.062	4.257	4.483	3.287	2.909	3.288	3.167	3.054	2.445	2.802	4.651	3.57	3.956	3.38	3.083	2.422	2.663	2.74
226442_at	ABTB1	5.943	5.021	4.952	4.806	4.716	3.972	4.811	4.191	4.941	4.727	5.137	6.803	4.757	5.105	4.915	5.133	5.124	5.13	4.893	4.694	5.617	4.332	4.849	5.237	4.816	4.857	5.242	5.122	5.822	5.441	5.494	4.08	4.891	4.627	3.861	5.016	5.512	4.642	5.372	4.658	6.019	4.223	5.389	5.417	4.917	5.858	4.584	4.781
242567_at	ABTB1	2.943	3.192	3.071	3.033	3.747	2.799	3.103	2.761	3.267	2.672	3.106	2.877	2.769	2.873	3.35	2.629	2.586	2.678	3.037	2.495	3.105	2.891	3.535	3.214	2.966	2.612	3.053	3.08	3.397	3.702	3.342	3.877	2.843	3.225	2.95	2.918	3.033	2.898	3.052	3.115	3.392	3.067	3.079	3.289	2.755	2.939	2.921	2.888
202502_at	ACADM	5.224	5.351	5.785	5.63	6.155	7.307	5.889	6.275	5.768	6.936	6.839	4.108	5.793	5.838	6.892	6.558	6.087	6.321	6.435	5.893	6.605	6.354	5.971	4.641	6.314	7.108	6.169	5.563	6.038	5.851	5.404	6.176	5.38	6.067	7.389	6.323	6.703	6.732	7.341	6.773	5.326	7.251	5.181	5.915	6.315	7.054	6.98	5.832
205355_at	ACADSB	2.21	1.932	2.189	2.361	2.242	1.949	2.36	2.491	2.158	3.053	2.185	2.194	2.201	2.111	2.417	2.383	2.25	2.283	2.363	2.232	2.259	2.007	2.29	2.186	2.458	2.387	2.319	2.036	2.045	1.879	2.21	2.67	2.221	2.796	3.492	2.518	2.272	2.358	2.527	2.187	1.976	2.845	2.136	2.23	3.01	2.333	2.738	2.273
226030_at	ACADSB	3.459	4.49	4.825	4.389	4.369	5.513	4.045	4.799	4.563	5.487	5.642	2.932	4.231	4.231	4.997	4.592	4.614	5.112	4.638	4.289	4.615	4.601	4.309	4.048	4.295	5.314	4.803	4.458	4.525	4.294	3.987	4.85	3.902	4.388	5.818	5.275	5.024	4.891	5.096	4.952	3.93	5.67	3.752	3.9	4.881	5.26	5.213	4.401
1559239_s_at	ACAT1	2.88	2.461	2.955	2.629	2.809	2.405	3.433	3.062	2.623	2.435	2.846	2.788	2.796	3.191	2.606	2.975	3.002	3.313	3.296	2.873	2.718	3.275	2.685	2.904	2.87	2.757	2.83	2.381	2.478	2.553	2.874	2.771	2.63	3.311	3.061	2.9	3.161	2.763	3.354	3.035	3.332	2.728	2.734	2.812	2.728	3.704	2.526	2.292
1568877_a_at	ACBD5	4.185	4.482	4.731	5.981	3.55	3.839	3.621	5.916	3.148	5.135	4.26	4.05	5.403	5.259	3.59	5.299	3.853	5.384	5.157	4.242	5.223	3.263	3.863	4.166	4.799	4.955	4.206	4.208	3.692	4.407	3.631	3.499	4.69	4.707	5.882	4.565	4.558	3.687	4.711	3.388	4.652	3.248	3.618	4.689	4.519	4.259	3.688	4.487
231711_at	ACPP	2.482	1.987	2.408	2.001	2.428	1.989	2.374	2.099	2.379	2.18	1.956	2.157	2.118	2.162	2.124	2.114	2.007	1.91	2.065	2.735	2.112	2.551	1.933	1.892	2.662	2.199	1.985	1.825	2.311	2.456	2.112	2.19	2.038	2.348	2.152	2.126	1.761	2.057	2.059	2.016	2.222	2.173	1.879	2.393	1.927	2.19	2.22	2.147
200974_at	ACTA2	6.675	6.2	5.682	5.942	5.847	4.582	6.996	5.564	5.67	4.898	4.228	5.704	5.434	5.114	5.564	5.792	6.529	5.521	5.911	6.084	5.596	4.916	5.649	4.753	5.362	5.616	6.346	6.178	5.82	5.466	6.461	6.093	5.404	6.513	6.602	6.025	6.066	5.884	6.902	6.293	6.022	6.35	5.862	6.628	6.937	5.225	6.343	7.219
243140_at	ACTA2	2.155	2.316	2.104	2.197	2.03	2.046	1.963	2.097	2.275	1.972	1.879	2.389	1.982	1.948	1.792	1.969	2.16	1.826	1.736	2.301	1.927	2.319	2.185	2.192	2.122	2.03	2.481	2.078	2.061	2.388	2.155	2.291	2.322	2.301	2.236	2.09	2.305	2.357	2.382	2.063	2.47	2.155	2.338	2.132	2.192	2.061	2.196	2.441
1554390_s_at	ACTR2	7.9	7.707	7.664	8.988	5.98	6.544	7.055	8.791	6.544	7.836	7.058	7.423	8.446	8.686	6.624	7.643	6.964	8.207	8.64	6.951	7.433	6.177	6.936	7.41	7.616	7.679	7.664	7.727	6.869	7.099	6.142	6.39	7.409	8.219	8.392	7.496	7.905	7.174	8.231	5.859	7.794	5.447	5.959	7.384	7.541	7.217	6.12	6.849
1558015_s_at	ACTR2	6.924	6.978	7.015	8.095	4.74	5.393	6.086	8.021	5.928	7.144	6.59	6.865	7.53	8.255	5.675	7.156	6.308	7.827	8.001	5.696	6.944	4.841	5.853	6.96	7.197	7.113	7.074	7.03	6.036	6.136	5.11	5.051	6.691	7.514	7.597	6.984	7.401	5.98	7.691	4.595	7.154	4.596	4.62	6.765	6.995	6.87	4.909	6.325
200727_s_at	ACTR2	8.843	8.629	8.521	9.877	7.162	6.789	8.205	9.82	7.671	8.841	8.15	8.361	9.422	9.906	7.116	8.546	7.853	9.127	9.424	7.823	8.522	6.974	7.709	8.5	8.57	8.604	8.595	8.704	7.728	8.458	7.087	7.329	8.429	9.337	9.493	8.672	8.809	7.842	9.152	6.371	8.823	5.861	6.393	8.493	8.653	8.079	7.156	7.698
234212_at	ACTR2	1.9	1.974	1.933	1.662	2.001	1.514	2.236	1.859	1.765	1.879	1.763	1.621	1.744	1.609	1.944	2.249	1.628	1.878	1.649	1.48	1.585	1.663	1.736	1.937	1.753	1.671	2.004	1.81	1.769	1.627	1.798	1.783	1.872	1.742	1.819	1.86	1.803	1.833	1.804	1.678	1.815	1.7	1.851	2.117	1.669	1.865	1.631	1.633
218395_at	ACTR6	3.338	4.55	4.498	4.947	5.058	6.786	4.266	4.778	4.519	6.318	6.047	3.212	5.115	4.542	5.045	5.608	4.561	5.303	5.187	4.882	6.06	5.047	4.485	3.594	5.213	6.218	5.038	4.612	4.261	4.97	3.668	5.371	3.509	5.114	6.829	4.971	5.713	5.576	6.33	5.764	3.999	6.66	3.646	5.146	5.225	5.937	6.105	5
208218_s_at	ACVR1B	2.218	2.164	2.28	2.21	2.36	1.928	2.275	2.403	2.253	2.259	2.47	3.049	2.29	2.209	2.135	2.326	1.995	2.316	2.414	2.275	2.16	2.333	2.127	2.308	2.193	2.129	2.198	2.192	2.162	2.432	2.63	2.354	2.267	1.987	2.701	2.655	2.5	2.381	2.637	2.487	2.741	2.376	2.563	2.387	2.388	2.475	2.408	2.189
208223_s_at	ACVR1B	2.647	2.303	2.414	2.51	2.154	1.932	2.2	2.049	2.374	1.99	1.92	2.515	2.542	2.445	2.439	2.027	2.757	2.091	2.76	2.69	2.429	2.385	2.704	2.163	2.155	2.209	2.145	2.085	2.359	2.441	2.329	2.254	2.17	2.417	2.039	2.513	2.671	2.28	1.909	2.442	2.054	2.038	2.886	2.425	2.184	2.145	2.284	2.156
214895_s_at	ADAM10	5.443	5.181	6.112	5.986	4.489	5.856	4.867	5.845	5.362	6.269	6.324	4.948	5.542	5.151	5.944	5.646	5.988	5.982	6.333	4.293	5.843	4.4	5.291	4.316	4.755	6.063	6.158	5.434	5.394	4.677	4.091	5.768	4.165	5.88	6.263	6.114	5.805	5.855	6.034	5.132	5.509	5.819	4.449	5.094	6.011	6.015	5.117	6.096
205997_at	ADAM28	4.824	5.017	5.05	5.501	4.834	5.977	5.027	6.074	6.105	6.709	4.897	4.992	5.667	6.482	5.949	6.683	6.376	6.174	6.262	5.724	5.568	5.695	6.274	5.033	5.781	5.549	5.276	6.149	5.583	4.846	4.249	5.497	6.161	6.234	5.86	5.498	5.205	4.524	7.171	5.39	5.867	5.833	4.913	4.188	4.718	5.937	7.194	5.221
208268_at	ADAM28	4.507	4.701	5.293	5.549	4.416	4.913	4.115	5.842	4.319	6.372	4.22	5.112	5.489	6.537	3.972	6.537	4.822	5.492	6.658	4.694	4.077	3.652	4.871	4.84	5.554	5.922	4.379	5.342	4.097	4.461	3.269	3.889	6.588	5.212	4.402	5.216	4.146	3.451	5.508	3.967	5.819	4.838	3.681	3.624	3.553	4.166	4.749	4.152
241446_at	ADAM28	2.097	1.999	1.892	2.181	1.951	2.015	1.979	1.842	2.018	2.018	1.962	1.893	1.896	2	2.056	1.986	1.812	2.672	1.685	1.916	2.255	2.336	1.789	2.096	2.236	2.806	2.048	2.046	2.045	2.265	2.277	1.882	2.14	2.107	1.883	2.312	2.108	1.586	2.376	1.999	2.033	2.221	2.007	2.122	1.833	1.941	2.284	1.924
206134_at	ADAMDEC1	2.107	2.193	2.36	2.084	3.296	2.419	2.413	2.194	2.132	2.546	2.249	1.982	2.451	2.117	2.406	2.642	2.509	2.327	2.375	2.153	2.222	2.141	2.755	2.187	2.794	2.562	2.646	1.962	2.359	2.464	2.488	2.322	2.211	2.755	3.128	2.627	2.424	2.428	4.098	2.936	2.286	3.26	2.716	2.112	2.892	3.031	3.19	2.438
1558636_s_at	ADAMTS5	1.684	1.874	1.704	1.487	1.726	1.764	1.95	1.878	1.921	1.69	1.721	1.41	1.44	1.761	1.746	1.751	1.945	1.687	1.569	1.691	1.769	1.691	1.704	1.661	1.772	1.799	1.577	1.844	1.839	1.921	1.618	1.729	1.884	1.953	1.702	1.77	1.626	2.047	1.623	1.702	1.475	1.503	1.734	1.527	1.882	1.474	1.785	1.583
219935_at	ADAMTS5	3.857	4.213	3.863	3.037	3.393	4.035	4.084	5.643	3.848	3.538	4.792	3.167	4.654	3.915	3.873	3.975	4.804	4.655	4.757	4.078	3.881	4.732	3.53	4.387	4.183	4.634	3.823	4.203	3.88	4.843	4.973	3.363	3.463	3.95	2.64	2.863	2.945	3.416	2.845	4.691	3.675	1.992	4.438	3.89	3.719	3.085	3.715	3.521
229357_at	ADAMTS5	2.905	2.974	3.303	2.155	2.438	3.128	2.273	4.012	2.392	3.05	3.341	2.445	2.666	2.373	2.566	2.607	3.814	3.067	2.987	2.873	3.009	3.643	2.991	2.859	2.49	3.504	3.139	2.857	2.825	3.054	2.745	2.714	2.88	2.741	2.321	2.807	2.784	2.649	2.212	3.016	2.639	2.209	2.601	2.667	2.646	2.541	3.323	2.387
235368_at	ADAMTS5	2.886	2.762	3.187	2.387	2.484	2.887	2.818	3.952	2.486	2.979	3.235	2.723	3.122	2.95	2.645	3.11	3.275	3.166	3.081	2.815	3.045	2.804	2.955	2.807	2.557	2.883	2.672	2.671	2.772	3.383	3.292	2.85	2.718	3.073	2.324	2.981	2.601	2.511	2.474	2.828	2.543	2.532	2.833	3.784	2.859	2.567	2.56	2.741
220578_at	ADAMTSL4	4.047	3.918	3.513	4.072	3.438	3.24	4.562	3.906	3.513	3.363	3.517	3.902	3.808	3.416	2.835	3.811	3.925	3.58	4.369	3.891	4.047	3.94	3.309	4.224	4.393	3.482	3.52	3.745	4.046	4.464	4.533	3.643	3.993	3.564	3.333	3.423	3.698	3.532	2.883	3.605	3.907	3.119	3.567	4.11	3.678	3.015	3.231	4.129
226071_at	ADAMTSL4	2.619	2.763	2.641	3.088	2.604	3.086	3.229	3.108	2.768	2.377	2.679	2.726	2.923	2.674	2.931	2.803	2.947	3.125	3.28	2.864	2.623	2.593	2.852	2.892	2.593	2.39	2.595	2.677	3.247	2.628	3.495	2.799	2.583	2.233	2.39	2.932	3.173	3.436	2.966	3.46	2.582	2.72	2.854	2.84	2.849	2.71	2.968	2.888
227213_at	ADAT2	3.211	4.449	4.45	4.824	4.606	5.615	4.874	4.992	4.959	4.962	4.135	3.897	4.308	4.128	5.267	4.739	4.116	4.731	4.551	4.436	4.055	4.961	5.23	4.373	4.304	4.286	4.92	4.737	4.65	3.921	4.708	4.243	4.807	4.672	5.835	4.807	4.796	4.877	5.206	4.807	4.476	5.591	3.926	4.42	4.604	5.342	5.339	4.399
230800_at	ADCY4	5.347	5.396	4.252	5.212	4.836	5.149	5.83	4.82	5.165	4.953	4.271	6.354	5.105	4.777	5.705	4.815	6.038	4.949	5.08	5.855	5.564	5.573	5.616	5.192	5.48	4.094	5.266	4.942	5.557	4.408	5.706	5.486	5.155	5.146	4.452	4.591	4.884	5.047	4.347	4.586	5.33	4.72	4.904	5.277	4.272	4.439	5.142	4.731
238939_at	ADD1	6.43	5.059	5.934	6.432	5.101	4.694	5.477	6.102	4.413	5.284	5.689	5.78	6.146	5.934	5.008	6.094	5.187	5.218	5.805	5.792	4.823	4.546	4.937	5.515	6.287	6.165	4.406	5.845	5.403	5.652	5.036	4.827	6.061	5.504	5.142	4.927	5.518	4.15	5.505	3.819	5.974	4.068	4.949	5.888	5.161	5.277	4.073	4.374
212070_at	ADGRG1	7.077	6.885	9.513	8.927	9.074	8.266	8.32	8.625	8.842	8.99	7.639	8.292	8.813	8.222	8.386	9.376	9.031	10.019	8.34	8.867	8.733	9.312	7.575	8.621	7.985	8.782	8.412	7.982	8.077	7.709	7.762	8.794	8.862	8.831	9.954	10.085	10.31	7.814	9.679	8.869	9.367	10.336	8.889	9.147	10.66	9.38	8.842	8.198
231675_s_at	ADH4	1.882	2.098	1.869	2.173	2.19	1.842	1.766	1.721	1.812	2.003	1.813	2.547	2.022	1.804	1.769	1.974	2.013	1.91	1.525	1.705	1.834	1.857	1.86	2.026	1.697	1.648	1.842	1.647	1.771	2.013	2.155	2.058	1.668	1.928	1.815	1.903	1.771	1.654	1.95	2.086	1.982	1.648	1.96	1.679	1.635	1.867	1.511	1.664
231678_s_at	ADH4	1.793	1.568	1.835	1.721	1.675	1.671	1.823	1.768	1.796	1.709	2.231	1.9	1.59	1.633	1.726	1.727	1.886	1.688	1.836	1.806	1.76	1.885	1.609	1.674	1.705	1.791	1.765	1.538	1.574	1.938	1.972	1.654	2.03	1.662	1.73	1.902	1.617	1.791	1.718	1.625	1.731	1.648	1.8	1.672	1.645	1.858	1.739	1.849
231703_s_at	ADH4	1.759	1.731	1.682	1.62	1.501	1.781	1.651	1.706	2.084	1.776	1.702	1.729	1.71	1.998	1.877	1.802	1.796	1.707	1.642	1.809	1.871	1.872	1.613	1.945	1.776	1.85	1.697	1.616	1.546	1.924	1.604	1.798	1.841	1.645	1.702	2.099	1.753	2.004	1.658	1.672	1.93	1.657	1.594	1.94	1.919	1.913	1.624	1.684
212500_at	ADO	4.843	5.117	5.999	5.326	5.277	6.167	5.342	5.879	5.274	6.19	6.278	4.142	5.674	5.164	5.507	5.842	5.599	6.255	5.723	5.61	5.251	5.805	5.62	4.546	5.7	6.262	5.591	5.451	5.094	4.919	5.003	6.238	4.522	5.457	6.618	6.028	5.854	6.269	6.501	6.133	5.249	6.608	4.766	5.276	6.223	6.257	6.296	5.409
235184_at	AEBP2	1.715	1.63	2.103	2.375	2.31	2.385	2.302	2.37	2.096	2.292	2.372	1.899	2.265	2.309	2.527	2.583	2.164	2.301	2.256	1.964	1.888	2.204	1.934	2.246	2.038	2.124	2.393	2.543	1.921	1.835	2.164	2.161	2.043	2.341	2.327	2.07	2.541	2.138	2.27	1.912	1.777	2.276	1.912	2.068	2.098	2.156	1.951	2.419
224685_at	AFDN	5.426	5.444	5.501	4.407	4.113	5.783	5.742	5.725	4.028	5.974	5.75	5.233	5.908	4.092	6.27	4.616	6.196	5.963	5.953	5.793	5.731	5.235	5.203	4.272	4.564	5.822	5.818	5.396	6.056	4.745	5.014	5.952	5.542	5.647	5.19	5.084	5.382	6.782	5.443	5.57	5.087	5.79	5.529	5.133	6.203	5.573	5.595	4.372
229775_s_at	AFDN	2.231	2.131	2.395	2.06	2.255	2.127	2.578	2.084	1.856	2.037	2.312	2.165	2.397	1.926	1.946	1.769	1.908	1.828	2.369	1.87	2.121	1.919	2.18	2.09	2.368	1.855	1.861	2.288	2.446	2.158	2.185	2.037	1.911	2.099	2.023	2.318	2.125	2.328	2.024	2.258	2.067	1.955	1.949	2.069	2.204	2.201	1.929	1.984
238871_at	AFDN	1.79	1.996	1.881	1.772	1.996	1.898	1.788	1.898	1.788	1.721	2.066	2.38	1.826	1.54	1.91	1.578	2.04	1.741	1.912	1.931	2.085	1.993	1.906	1.866	1.657	1.832	1.826	2.187	1.829	1.942	2.32	1.616	1.636	1.715	1.655	1.983	1.468	1.946	1.848	2.09	2.191	1.982	2.069	1.773	1.733	2.24	2.094	2.144
204333_s_at	AGA	3.943	4.393	4.647	4.774	4.33	5.544	4.107	5.24	4.041	4.834	4.89	3.074	4.899	4.346	5.048	4.515	4.353	5.334	4.687	4.277	3.947	4.372	4.319	3.704	4.23	4.967	4.604	4.457	4.485	3.23	4.154	4.355	3.878	4.593	5.662	4.725	5.115	4.84	5.298	5.463	3.644	5.77	4.227	4.314	5.194	5.331	5.119	4.304
1565620_at	AGAP4	6.619	5.701	6.102	6.293	5.692	5.151	6.202	7.092	6.084	5.759	5.686	5.492	6.587	6.258	5.741	6.398	6.038	5.884	6.533	5.984	5.883	5.524	6.039	6.168	6.316	7.331	6.148	6.148	6.456	6.661	6.175	5.788	6.645	5.88	6.025	5.589	5.558	4.199	5.704	4.276	6.252	4.791	5.975	5.504	5.91	5.43	4.409	5.244
240230_s_at	AGAP9	4.532	4.237	4.251	5.259	3.694	3.825	4.195	5.341	4.464	4.325	3.905	3.852	4.912	5.329	4.043	4.716	4.303	4.479	4.969	3.649	4.343	3.584	4.342	4.764	4.919	4.56	4.225	4.761	4.633	4.127	4.105	3.432	5.605	4.722	4.017	4.05	4.014	3.342	4.035	3.422	4.596	3.499	3.464	3.808	4.233	4.034	3.367	3.695
1554618_at	AGFG2	3.384	3.192	2.6	3.192	3.54	3.291	3.132	3.164	2.652	2.715	3.3	3.1	2.938	3.02	2.66	2.946	2.577	3.169	2.926	3.561	3.119	2.787	2.664	3.358	2.919	2.923	2.855	2.627	3.099	3.537	3.376	2.732	3.339	3.02	3.175	2.647	3.022	3.399	3.293	3.013	3.323	2.673	3.037	2.578	3.121	2.957	2.51	3.151
203566_s_at	AGL	5.085	5.753	6.911	6.481	6.492	7.691	5.792	6.518	6.129	7.566	7.227	3.823	6.237	5.795	6.373	6.744	6.705	6.894	6.754	6.358	6.627	6.259	6.377	5.436	6.429	7.402	6.429	6.19	5.76	5.497	5.045	7.031	5.248	6.459	8.01	6.879	7.41	6.729	7.484	6.956	5.145	7.797	4.751	5.73	7.24	6.938	7.232	6.478
226115_at	AHCTF1	6.224	5.444	5.931	5.572	5.316	6.847	5.24	5.879	5.489	6.307	6.229	5.076	5.82	5.101	6.058	5.487	5.9	5.797	6.225	5.818	5.863	5.712	5.577	4.55	5.066	6.399	6.304	5.803	6.021	4.666	4.689	6.633	4.789	5.823	6.664	5.539	5.744	6.24	6.018	5.853	5.357	6.489	4.389	5.133	5.909	5.791	6.155	5.946
229354_at	AHRR	3.206	3.192	3.096	2.961	3.051	2.932	2.949	2.678	2.882	2.916	2.822	3.469	2.688	2.89	2.969	2.954	2.921	2.928	2.552	3.011	2.977	2.869	3.553	3.087	2.533	2.548	2.935	2.568	2.905	3.634	3.347	3.229	4.573	2.756	2.876	2.911	3.055	3.201	2.998	2.77	2.912	2.736	2.998	3.202	2.986	3.152	2.984	3.081
202541_at	AIMP1	4.327	5.045	5.243	5.316	5.358	6.584	4.984	5.741	4.725	6.452	5.853	3.793	5.028	4.959	6.012	5.782	5.278	6.008	5.93	5.398	5.499	4.895	4.91	4.523	5.553	6.063	5.546	4.909	5.332	4.839	4.717	5.898	4.957	5.168	6.679	5.753	5.849	6.127	6.375	5.942	5.399	6.587	4.417	5.006	5.529	6.388	6.326	5.208
227605_at	AIMP1	4.588	5.113	5.147	5.174	5.36	5.861	5.239	5.575	4.79	6.005	5.171	3.698	4.893	5.266	5.591	5.46	5.787	5.52	5.458	5.602	5.106	5.15	5.387	4.15	5.71	6.006	5.296	5.32	4.618	4.218	5.216	5.316	5.307	5.211	5.436	5.638	5.316	5.402	5.307	5.604	4.658	6.37	5.024	4.261	5.247	5.315	6.091	4.82
219308_s_at	AK5	3.629	4.476	3.622	3.324	3.621	4.915	2.967	4.383	4.109	4.69	3.717	3.147	3.93	3.785	4.083	3.238	3.362	4.273	3.191	3.912	3.63	4.463	4.232	3.719	2.931	4.722	3.129	3.734	3.542	3.641	3.802	4.045	3.533	3.3	2.888	4.536	3.883	3.999	2.56	4.108	2.845	4.143	3.578	3.213	2.089	4.33	4.753	3.142
222862_s_at	AK5	5.695	5.885	5.649	4.98	5.368	5.945	4.971	5.878	5.714	5.86	5.201	5.036	5.117	5.644	5.995	5.532	5.044	5.733	4.974	5.324	5.399	5.153	5.784	5.555	4.775	6.046	4.329	5.615	4.595	5.228	5.31	4.983	5.478	5.112	3.712	6.151	4.961	5.338	3.823	5.219	4.59	5.696	5.55	4.756	3.944	5.701	6.492	4.541
203893_at	AK6	3.945	4.317	4.351	4.318	4.109	6.153	4.057	4.513	3.976	4.969	4.553	2.859	4.114	3.659	4.536	4.382	4.46	4.622	4.171	4.128	4.72	4.086	4.249	3.864	4.526	5.003	4.409	4.289	3.343	3.863	3.789	4.437	4.12	4.142	5.859	4.351	4.965	4.964	5.307	4.779	3.339	5.556	3.315	4.314	4.558	5.166	5.561	3.993
205045_at	AKAP10	4.516	4.283	4.594	5.57	3.968	3.851	4.195	5.215	4.57	5.018	4.675	4.81	4.67	4.654	4.499	4.34	4.443	4.648	4.941	4.029	4.636	3.436	4.546	4.278	4.497	4.333	4.657	4.61	3.901	4.214	4.274	3.883	4.142	5.062	4.503	4.887	4.755	4.084	4.831	3.929	5.07	4.041	4.679	4.718	4.211	4.868	4.378	4.052
210517_s_at	AKAP12	2.886	2.526	3.007	3.522	3.588	3.553	3.453	3.266	3.741	4.519	2.909	2.925	3.109	3.043	2.977	3.445	3.275	4.127	3.912	4.238	4.067	3.769	3.259	2.729	1.908	3.718	3.173	3.897	3.114	3.192	2.77	3.856	3.65	3.925	2.981	3.564	2.113	3.915	2.364	2.801	2.934	3.669	2.455	2.165	3.679	4.311	4.253	2.105
227529_s_at	AKAP12	1.804	1.795	1.977	1.993	2.112	2.043	2.978	1.976	2.188	2.236	2.299	2.15	2.049	1.919	1.899	1.796	2.339	2.331	1.958	2.09	2.623	2.279	1.908	1.937	1.942	2.165	2.034	2.075	1.812	2.181	1.758	1.963	1.973	2.285	1.864	2.624	1.739	2.045	1.705	1.675	2.06	1.693	1.734	1.818	2.07	2.472	2.179	1.79
227530_at	AKAP12	2.735	3.412	3.548	2.945	3.233	3.431	4.178	2.858	3.356	3.781	3.027	3.165	3.138	3.034	3.091	2.877	3.346	3.503	3.465	3.435	4.059	3.497	3.26	3.123	2.656	4.269	3.352	3.797	3.268	3.498	2.897	4.405	3.343	3.776	2.673	3.39	2.356	3.767	2.664	2.792	2.505	3.129	2.691	2.254	3.6	3.322	3.326	2.604
231067_s_at	AKAP12	2.599	2.974	2.992	2.89	2.804	3.107	2.738	3.365	3.19	2.794	3.063	2.739	2.634	2.246	2.582	2.758	2.741	2.917	3.181	2.661	2.644	3.539	3.323	2.407	2.562	3.325	2.658	3.282	3.077	2.631	2.81	3.004	2.694	2.505	3.022	2.746	2.541	2.411	2.652	2.679	2.763	3.841	2.603	2.845	2.937	2.936	2.77	2.799
240554_at	AKAP8L	5.655	5.195	5.199	6.006	4.699	4.835	5.3	5.84	5.004	5.219	5.144	5.813	5.288	5.495	4.693	4.981	5.457	5.251	5.385	5.412	4.892	4.523	4.999	5.125	5.867	5.702	4.91	5.438	5.017	5.584	4.373	4.562	5.729	4.785	5.097	4.675	4.609	3.967	4.395	3.803	5.904	4.882	4.451	4.769	4.805	4.4	4.44	4.768
222458_s_at	AKIRIN1	6.589	5.787	5.797	6.135	4.86	5.058	5.27	6.216	5.497	5.774	6.515	6.35	6.029	6.052	5.476	5.866	5.721	6	6.358	4.947	5.656	5.021	5.208	5.097	4.826	6.413	6.041	5.745	5.806	4.835	4.904	4.934	5.371	5.775	5.416	6.009	5.872	4.61	6.292	4.504	5.728	4.849	4.988	5.913	6.134	6.07	4.703	5.403
213810_s_at	AKIRIN2	4.073	3.777	4.054	3.685	3.611	3.783	4.211	3.771	3.67	3.693	3.904	3.929	4.308	3.797	4.102	3.632	4.361	3.826	3.716	3.936	3.243	3.615	3.559	3.582	3.456	3.476	3.609	4.125	3.66	3.59	4.071	4.429	2.954	3.513	3.877	3.77	3.66	4.327	3.239	3.97	3.996	3.935	3.527	4.059	3.506	4.831	3.988	3.635
223143_s_at	AKIRIN2	3.869	2.637	3.251	3.197	2.65	2.411	2.469	2.666	2.604	2.483	2.746	4.279	2.855	2.523	2.708	2.83	2.953	3.109	2.548	2.117	2.251	2.103	2.454	2.523	2.3	3.037	2.805	3.152	3.5	2.71	2.724	2.254	2.311	1.998	2.288	3.614	3.397	2.761	4.719	2.794	3.41	2.483	2.759	2.372	2.625	2.489	2.374	3.044
209160_at	AKR1C3	3.345	3.363	5.032	5.149	5.566	6.508	4.562	4.472	4.744	7.265	6.749	6.049	6.017	5.32	5.457	6.311	4.935	6.813	5.719	4.919	7.168	5.59	4.483	5.508	5.381	6.669	6.382	4.533	5.226	6.178	4.514	6.576	5.691	5.835	2.579	5.824	5.228	4.067	3.579	5.48	4.057	6.253	4.09	4.931	5.275	5.299	5.989	3.41
1560689_s_at	AKT2	5.32	4.788	4.956	4.636	4.422	4.284	4.734	4.74	4.332	4.539	4.602	4.735	5.063	5.187	4.29	5.139	4.678	4.58	4.861	4.636	4.664	4.391	5.001	4.98	4.447	5.23	4.624	4.538	4.594	5.661	5.19	4.5	5.235	4.687	3.67	4.509	4.306	3.859	4.292	4.154	4.732	4.688	5.131	4.902	5.227	4.241	3.755	3.659
212224_at	ALDH1A1	6.767	6.999	6.543	4.82	5.237	6.209	6.303	7.227	6.591	5.625	6.184	5.175	6.366	5.82	5.818	5.856	6.548	6.758	5.794	6.166	5.888	5.867	6.734	6.509	6.659	7.051	7.179	6.644	7.092	5.713	7.188	6.845	5.573	7.224	6.165	6.547	5.558	7.261	7.241	6.475	6.327	5.921	7.005	7.019	6.416	6.416	6.989	5.327
221588_x_at	ALDH6A1	4.679	4.577	5.278	5.062	4.651	4.543	4.923	5.437	4.862	4.66	4.766	4.299	5.273	5.132	4.821	4.91	4.758	4.941	5.167	5.219	5.061	4.525	4.469	5.207	5.507	5.324	4.118	4.234	4.375	4.989	4.963	3.915	5.858	4.878	4.624	4.63	4.606	4.273	4.141	4.969	4.72	4.567	4.562	4.378	4.762	4.399	4.192	4.388
221590_s_at	ALDH6A1	2.518	2.858	3.077	3.378	2.176	2.709	3.167	3.506	2.818	2.854	2.834	2.533	3.39	2.92	2.609	3.023	2.973	2.722	3.278	3.08	2.642	2.816	2.74	2.523	2.916	2.765	3.093	2.502	2.412	2.88	2.928	2.72	2.88	2.685	2.135	2.43	2.926	2.985	2.378	3.476	2.885	3.359	3.379	2.489	3.49	2.469	2.626	2.711
1553954_at	ALG14	2.772	3.302	3.761	3.518	3.341	4.604	3.41	3.664	3.404	4.417	4.716	3.238	3.261	3.013	5.289	4.573	3.589	4.349	3.81	3.77	4.066	4.058	4.085	3.375	4.444	4.954	3.735	3.406	3.728	3.917	3.891	3.64	2.88	4.163	4.761	3.74	4.294	4.67	4.648	4.94	3.965	4.787	4.232	4.166	4.194	4.553	4.781	3.284
243352_at	ALPK1	5.604	5.655	5.721	7.202	5.667	5.666	5.773	7.371	5.832	5.886	5.121	7.24	6.189	6.222	4.567	5.423	6.618	5.127	5.594	5.715	6.204	5.479	4.138	6.463	6.367	6.069	5.905	6.677	6.946	5.504	5.67	5.913	5.544	6.206	5.298	5.611	5.397	5.818	5.213	5.346	7.049	5.561	5.328	5.427	6.117	3.811	5.107	6.093
207845_s_at	ANAPC10	1.872	2.672	1.977	2.718	2.764	4.543	2.559	2.156	2.78	4.029	4.049	2.037	2.522	2.003	3.296	2.923	2.813	2.951	2.645	2.653	3.381	3.295	2.598	2.03	3.306	3.738	3.078	2.225	2.431	2.583	2.308	2.763	2.168	2.35	4.74	2.762	3.393	3.399	3.753	3.434	2.432	4.287	1.906	2.966	2.968	3.946	3.659	2.922
241959_at	ANAPC10	1.852	1.839	1.988	2.286	2.153	2.376	1.92	2.111	1.926	2.384	2.628	1.987	2.079	1.839	1.966	2.088	2.406	2.052	1.994	2.069	2.435	1.948	1.967	1.954	1.959	2.485	2.453	2.147	2.088	2.5	2.276	2.01	1.854	1.782	2.47	2.15	2.033	2.129	1.811	2.255	2	2.741	1.806	1.963	2.148	2.088	2.411	2.041
220144_s_at	ANKEF1	2.941	3.523	3.314	2.993	3.448	3.582	3.104	3.722	3.621	3.835	3.112	3.306	3.249	3.182	3.402	3.251	2.852	3.62	3.006	3.333	3.349	2.997	3.1	3.074	3.063	3.686	3.509	3.369	3.317	3.18	3.517	3.751	3.136	3.675	3.808	4.194	3.928	3.711	3.443	3.585	3.452	3.959	3.577	3.404	3.597	3.562	3.706	3.148
219868_s_at	ANKFY1	5.279	4.213	5.474	4.699	4.477	4.061	4.569	4.441	5.205	4.21	4.954	4.93	4.293	4.558	4.909	4.455	4.622	4.921	4.398	3.964	4.425	4.183	4.421	4.544	4.339	4.525	4.592	4.411	4.673	4.162	4.162	4.704	4.277	5.405	4.71	5.135	5.319	4.565	5.298	4.374	5.076	4.453	4.934	5.099	4.971	4.747	4.383	4.238
1560369_at	ANKH	2.104	2.344	2.096	1.864	2.193	2.305	1.929	2.054	2.289	2.038	2.301	2.492	1.966	2.11	1.922	2.114	1.992	1.988	2.087	2.143	2.107	2.116	2.205	2.145	1.932	1.999	1.94	1.979	1.868	2.373	2.13	1.896	2.227	2.049	2.072	2.568	2.293	2.402	1.978	2.274	2.292	2.043	2.509	2.602	2.004	2.084	2.049	2.512
220076_at	ANKH	4.012	4.312	4.724	4.061	5.538	4.388	4.546	4.949	4.609	4.484	4.167	4.06	4.098	4.255	4.364	5.084	4.346	3.981	4.176	3.955	3.813	4.126	4.856	3.714	4.447	4.725	4.338	3.804	4.218	4.116	3.48	4.099	4.244	4.335	4.344	3.652	3.679	4.252	3.652	3.9	3.454	4.677	3.536	4.474	4.458	5.124	4.441	4.326
223094_s_at	ANKH	5.212	6.983	7.146	5.7	8.024	5.173	6.765	5.904	8.151	5.704	5.947	7.8	5.409	7.11	5.892	6.823	6.851	6.937	5.453	6.438	7.65	6.799	7.044	6.114	6.608	5.15	7.472	7.243	6.663	7.685	6.464	5.974	5.795	4.59	5.685	6.179	5.816	7.207	6.135	6.278	6.444	5.696	6.341	7.762	6.639	7.571	7.978	6.504
229176_at	ANKH	3.557	3.681	4.188	3.486	4.682	4.124	3.397	4.227	4.16	4.057	4.037	4.073	3.568	4.046	3.75	3.922	3.569	3.84	3.214	3.253	3.951	3.885	3.973	3.623	3.924	3.653	4.034	3.953	3.52	4.271	3.789	3.908	3.943	3.479	3.375	4.383	3.521	4.183	3.91	4.011	3.706	4.161	3.439	4.498	4.342	4.788	4.472	4.325
238851_at	ANKRD13A	7.561	7.048	6.738	7.361	6.45	5.894	7.022	6.904	6.509	6.399	6.642	7.715	7.364	7.171	6.153	6.651	7.387	6.309	7.228	6.562	6.67	5.733	6.523	6.814	7.453	7.043	6.777	7.039	7.417	7.162	6.387	6.279	7.258	6.836	6.34	5.55	6.229	5.596	5.786	4.991	7.219	5.09	6.458	6.933	6.621	5.628	4.845	6.229
212731_at	ANKRD46	4.726	5.119	5.872	5.73	6.152	7.288	5.509	5.936	5.548	6.83	7.111	4.082	5.886	5.422	5.955	6.093	5.902	6.516	5.8	5.504	5.799	6.093	5.82	4.187	5.715	6.919	6.089	5.736	5.693	5.734	5.428	6.323	5.058	5.511	6.707	6.458	6.362	6.331	6.809	6.461	5.003	7.336	4.994	5.182	6.258	6.578	6.984	6.006
227959_at	ANKRD9	3.375	4.405	4.517	4.765	7.168	4.346	5.072	3.884	5.636	4.541	5.325	6.297	4.485	6.013	4.084	5.003	5.298	4.617	3.891	4.103	4.871	5.155	4.769	5.57	4.662	3.627	4.878	4.767	4.656	4.902	4.465	4.959	3.285	3.126	5.127	5.19	5.544	5.444	3.902	5.105	4.488	4.336	4.818	6.538	4.564	6.716	6.56	5.817
230972_at	ANKRD9	5.89	7.226	7.566	7.326	8.394	5.892	7.405	6.76	8.247	7.011	7.893	8.504	6.408	8.055	6.361	7.674	7.508	6.922	6.489	7.581	7.992	7.823	7.541	7.779	6.214	5.936	7.736	7.467	7.022	7.127	7.075	7.155	6.48	5.342	7.21	7.097	7.142	7.522	6.147	7.123	7.553	5.704	7.411	8.61	7.492	8.98	8.964	8.485
220710_at	ANP32A-IT1	6.213	6.011	5.544	5.721	4.818	5.392	5.892	5.836	5.091	5.284	5.122	5.46	5.494	5.061	5.565	5.314	5.915	4.865	5.336	5.741	4.674	5.632	6.032	5.163	5.785	6.226	5.742	5.67	5.775	5.29	6.091	5.344	5.068	5.469	4.604	4.42	4.341	5.188	4.258	5.151	5.625	5.162	6.386	5.166	5.607	4.547	4.796	5.107
238050_at	ANTXR2	4.002	3.493	3.386	3.348	3.333	3.47	3.579	3.448	2.993	3.298	3.552	3.986	3.61	3.202	2.717	3.069	3.379	3.144	3.692	3.422	2.967	2.921	3.259	3.191	3.579	3.641	3.342	3.26	3.23	3.334	3.099	3.33	3.321	3.679	2.872	3.042	3.078	3.165	2.694	2.403	2.836	3.022	3.062	2.963	3.213	2.629	2.858	3.414
233011_at	ANXA1	5.401	6.306	6.218	6.308	6.57	6.451	6.814	6.957	6.928	6.44	5.837	6.495	6.473	6.007	5.738	5.862	6.32	6.491	6.316	6.624	6.77	6.153	6.501	5.614	7.294	6.749	7.045	6.353	6.2	7.088	7.452	5.883	6.161	6.797	5.722	5.678	5.461	6.22	5.21	7.172	5.636	7.231	6.797	5.926	6.416	5.357	6.311	5.948
244250_at	ANXA6	2.668	2.699	2.668	2.296	2.791	2.843	2.312	2.373	2.986	2.666	3.155	3.082	2.445	2.888	2.681	2.769	2.602	2.516	2.645	2.2	2.664	2.856	2.666	2.692	2.49	2.338	2.526	2.319	2.141	2.956	2.657	2.523	2.795	2.623	2.876	2.827	2.865	2.906	2.821	2.824	2.949	2.692	2.593	2.568	2.844	3.157	2.758	2.396
220228_at	AP4E1	2.113	1.57	1.875	1.934	1.995	2.012	2.191	1.727	1.93	1.862	1.777	1.997	1.959	2.052	1.854	1.973	2.553	1.991	1.832	2.078	2.065	2.503	2.332	2.004	2.153	2.124	1.882	1.963	2.113	1.91	1.763	1.937	1.92	2.13	1.771	2.032	1.848	2.027	1.826	1.789	1.838	1.898	1.988	2.016	1.992	1.923	1.892	2.125
220229_s_at	AP4E1	1.821	1.789	1.752	1.889	2.019	2.036	1.786	2.045	1.555	1.862	1.853	1.861	1.876	1.761	1.982	1.649	1.742	1.859	1.62	1.666	1.821	1.839	1.752	1.613	1.733	1.742	1.702	1.751	1.802	1.811	1.825	1.441	1.866	1.713	1.85	2.069	1.739	2.072	1.636	1.89	1.861	1.976	2.105	1.615	1.994	1.698	1.606	1.722
1555448_at	AP5M1	2.181	1.891	1.789	2.044	1.818	1.946	1.665	2.236	1.828	2.195	1.911	2.628	2.092	2.534	2.056	2.157	1.934	2.244	2.667	1.72	2.023	1.839	1.777	2.221	2.24	1.776	1.863	2.27	1.89	1.844	2.096	1.675	2.656	1.895	1.904	2.073	1.923	1.753	2.037	1.764	2.318	1.91	1.912	2.223	1.92	2.073	1.698	2.051
211553_x_at	APAF1	2.754	2.563	2.666	2.786	2.627	2.574	2.888	2.194	2.582	2.718	2.359	2.798	3.078	2.872	2.695	2.587	2.516	2.967	2.74	2.726	2.765	2.489	2.828	3.141	2.821	2.729	2.415	2.771	2.482	2.648	2.544	2.527	2.703	2.406	2.427	2.156	2.712	2.608	2.738	2.455	2.945	2.313	2.645	2.549	2.923	2.503	2.479	3.225
214959_s_at	API5	3.374	2.757	3.452	3.907	2.815	3.299	2.92	3.538	2.712	3.172	3.086	2.951	3.04	3.12	3.881	3.432	3.513	3.656	3.284	2.521	3.231	3.5	3.094	2.724	3.178	4.385	3.71	3.625	3.296	2.904	2.387	3.235	3.487	3.658	3.696	3.597	4.054	3.169	3.739	3.348	3.906	3.877	3.227	3.279	3.314	3.395	2.988	2.388
214960_at	API5	4.981	4.507	5.15	4.999	4.014	5.434	4.653	5.296	4.245	5.184	4.709	4.175	5.115	4.243	5.062	5.152	4.817	5.281	5.142	4.319	3.863	4.403	4.629	4.049	4.741	5.905	5.31	4.5	4.931	4.617	4.421	4.573	4.954	4.212	5.255	4.51	5.091	4.554	5.183	4.964	4.596	5.446	4.616	4.412	4.903	5.31	4.498	3.77
233078_at	API5	2.656	2.885	3.405	3.642	2.679	3.237	2.923	4.004	2.813	3.54	3.518	2.772	3.807	3.14	2.88	3.392	2.726	3.284	3.858	3.146	3.125	2.91	3.072	2.945	3.473	3.619	3.163	2.942	3.022	3.219	2.259	3.09	3.816	3.168	3.879	2.974	3.245	2.259	3.347	1.974	2.913	2.489	1.997	2.766	3.6	3.547	2.058	3.261
232630_at	APIP	2.145	2.089	2.717	2.258	1.995	2.262	2.221	3.101	2.219	2.253	2.238	1.903	2.317	2.454	1.918	2.618	2.561	2.212	3.542	2.149	1.941	1.926	2.104	1.963	1.882	2.855	2.239	2.765	1.977	1.504	2.289	1.8	2.241	2.109	2.729	1.742	2.687	2.121	1.698	2.705	2.207	2.462	2.1	2.037	2.346	2.221	2.039	2.125
208701_at	APLP2	3.918	2.91	3.353	3.199	2.776	2.506	3.127	3.367	2.769	3.394	2.93	3.397	3.754	3.72	3.166	3.123	3.856	2.987	3.174	2.939	3.8	2.937	3.184	3.439	3.352	2.859	3.068	3.033	2.868	3.352	2.966	2.891	3.819	2.911	3.143	3.656	2.782	3.171	2.724	2.858	3.431	2.755	2.741	3.184	3.176	3.336	3.112	3.233
203382_s_at	APOE	4.11	3.605	4.161	4.099	3.135	3.964	3.716	3.476	4.229	4.035	4.344	4.239	3.986	3.946	4.007	3.826	2.975	4.157	3.35	3.934	3.901	3.776	3.697	4.075	4.097	3.682	3.876	4.177	4.047	4.424	4.301	3.982	3.623	4.073	3.809	4.246	3.829	4.479	4.127	4.449	4.215	4.165	4.764	4.709	3.824	4.065	4.339	3.958
212874_at	APOE	2.938	2.975	2.622	2.6	2.609	2.759	2.666	2.722	3.148	2.563	2.532	2.325	2.249	3.312	2.651	2.645	3.081	2.664	3.078	2.27	2.533	2.958	2.859	3.101	2.739	2.092	2.533	2.408	2.635	2.821	2.603	2.893	2.46	3.078	2.586	3.078	2.353	2.909	2.395	2.352	2.769	2.602	2.681	2.556	2.707	3.15	2.408	2.406
214953_s_at	APP	4.11	3.116	3.951	3.238	3.631	2.843	3.184	3.839	3.539	3.28	3.639	3.808	3.239	3.628	3.078	3.469	3.592	3.661	3.224	3.198	3.414	3.024	3.273	3.792	3.086	3.257	3.253	3.361	3.752	3.697	4.056	4.078	3.342	3.26	2.709	3.95	3.286	3.254	2.595	3.929	3.663	4.678	4.774	3.771	3.832	3.287	3.888	3.275
214483_s_at	ARFIP1	5.124	4.118	4.586	4.769	3.206	3.049	3.053	4.334	3.152	4.485	4.282	4.478	4.112	5.371	2.963	5.228	3.693	4.996	5.584	3.109	4.236	3.447	3.094	4.626	4.72	4.748	4.423	5.221	3.304	2.935	2.633	3.643	4.746	4.503	4.483	4.149	4.078	3.176	4.216	3.1	4.814	3.331	2.98	3.317	4.15	3.715	2.535	3.061
225166_at	ARHGAP18	2.524	3.462	4.353	4.301	4.874	4.63	3.848	4.041	4.09	4.486	5.251	3.78	3.591	2.97	4.353	4.576	4.036	4.359	4.153	4.12	5.587	3.742	3.967	4.173	4.313	4.53	4.469	4.591	4.044	4.223	3.214	4.197	3.266	3.111	5.328	4.148	4.569	4.881	4.361	4.974	4.04	3.955	3.979	4.396	5.383	5.336	5.165	4.014
225171_at	ARHGAP18	5.03	5.465	5.895	5.986	5.861	6.505	5.592	6.02	5.266	5.914	6.229	4.413	5.706	5.244	6.13	5.561	5.636	6.033	6.31	5.34	5.946	5.857	5.465	5.253	5.378	5.871	5.853	5.576	5.385	4.586	4.214	6.288	4.513	5.579	7.281	5.991	6	6.204	6.687	5.832	5.642	5.817	4.235	5.372	6.489	6.084	6.144	6.13
202046_s_at	ARHGAP35	2.137	2.258	1.869	2.065	2.139	1.833	2.19	1.82	1.935	1.837	2.168	1.909	2.051	2.161	2.132	1.971	1.829	2.192	1.933	1.892	1.86	2.062	1.778	2.073	2.088	1.751	2.097	2.315	2.173	2.492	2.16	2.205	2.431	2.243	2.076	2.399	2.269	2.366	2.234	1.995	2.2	2.085	2.3	2.083	1.988	2.102	1.91	2.512
229397_s_at	ARHGAP35	2.206	2.162	2.153	2.209	2.387	2.661	2.537	1.887	2.161	2.266	2.028	2.146	2.037	2	2.47	2.176	2.28	2.157	2.128	2.16	2.147	1.98	2.627	2	2.27	2.196	1.958	2.286	2.351	2.304	1.922	2.522	2.158	2.555	2.58	2.427	2.542	2.338	2.377	2.561	2.327	2.698	2.456	2.643	2.555	3.229	2.596	2.273
213606_s_at	ARHGDIA	2.952	2.612	2.661	2.476	2.473	2.107	2.885	2.54	2.712	2.658	2.48	2.279	2.197	2.887	2.983	2.826	2.997	2.514	2.78	2.502	2.736	2.821	2.62	2.629	2.313	2.179	2.744	2.743	2.909	2.31	2.905	2.766	2.393	3.017	2.821	2.608	3.141	2.894	3.44	2.611	3.072	3.238	2.668	2.645	2.512	2.757	2.81	2.768
1570511_at	ARHGEF10L	5.043	4.668	5.421	4.393	4.152	4.189	5.032	5.672	4.444	3.771	4.639	4.569	4.996	4.791	4.529	4.486	4.24	4.805	4.936	4.798	4.538	4.484	4.925	5.261	5.373	4.972	4.844	4.591	5.053	5.183	6.613	4.728	4.981	4.543	3.868	3.794	4.116	4.616	4.245	4.616	4.699	4.154	5.443	5.155	4.636	3.749	4.353	4.436
1554783_s_at	ARHGEF2	2.618	2.577	2.52	2.801	3.017	2.611	2.416	2.473	2.589	2.772	2.559	2.953	2.33	2.775	2.714	2.543	2.197	2.862	2.778	2.366	2.352	2.449	2.673	2.783	2.593	2.562	2.75	2.481	2.846	2.926	3.011	2.549	2.719	2.797	2.038	3.027	3.341	2.413	3.078	2.951	2.788	2.546	2.802	3.088	2.501	2.696	2.586	2.441
1562270_at	ARHGEF7	2.85	2.685	3.255	2.675	2.472	2.469	2.331	2.986	2.683	2.251	2.499	2.418	2.674	2.963	2.645	2.649	2.676	2.632	2.445	2.469	2.369	2.279	2.519	2.217	3.146	3.278	2.449	2.865	2.467	2.581	2.628	2.387	2.542	2.241	2.435	2.731	2.477	2.492	2.3	2.581	2.856	2.734	2.792	2.357	2.605	2.295	2.526	2.246
235412_at	ARHGEF7	2.207	1.868	2.121	2.013	1.97	2.302	2.109	1.999	2.044	1.994	1.85	1.979	1.876	2.176	1.788	2.06	1.891	1.986	2.605	1.942	2.143	2.067	1.732	2.278	1.917	2.048	1.998	1.781	1.764	1.918	2.03	1.931	1.89	1.867	2.308	2.008	2.18	2.857	2.127	1.829	2.19	1.835	2.043	1.917	2.015	2.242	1.968	2.103
239397_at	ARHGEF7	3.97	3.447	3.497	4.288	3.539	3.128	3.372	3.837	3.319	2.894	3.711	4.26	4.031	3.269	3.051	3.428	3.298	3.331	3.37	2.986	3.43	2.873	3.009	3.888	3.658	3.631	3.251	3.513	3.132	4.389	3.457	2.933	4.023	3.306	3.269	2.975	3.476	3.301	3.042	3.225	3.875	3.062	3.483	3.704	3.463	3.263	2.828	3.045
231090_s_at	ARID2	3.296	3.376	3.746	3.474	4.146	4.229	3.631	3.37	3.517	4.061	3.398	3.234	3.76	3.122	3.713	3.856	3.741	3.545	3.997	3.69	3.23	3.984	3.608	2.861	3.758	3.724	3.526	3.076	3.532	3.622	3.527	4.85	3.435	3.891	4.003	3.498	3.547	3.538	3.715	3.617	2.577	4.213	3.151	2.886	3.583	3.563	3.79	4.041
214139_at	ARID4B	2.805	2.311	2.542	2.786	2.833	2.818	3.391	2.65	2.446	2.556	2.881	2.637	2.76	3.102	2.86	2.328	3.073	2.588	2.788	2.174	2.672	2.713	2.391	3.1	2.585	2.363	2.473	2.576	2.506	2.873	2.598	2.543	2.773	3.19	3.25	2.699	2.698	2.704	2.456	2.426	2.848	2.436	2.712	3.011	2.478	3.05	2.615	2.401
224322_at	ARID4B	4.445	3.51	3.526	4.417	3.815	3.755	4.485	3.721	3.521	3.244	3.738	3.531	3.829	4.03	3.202	3.468	3.89	3.488	4.386	3.526	3.841	3.267	3.73	4.048	3.732	4.045	3.071	3.453	4.271	4.387	3.447	3.738	4.623	3.604	3.136	3.471	3.142	2.879	3.041	2.93	3.868	3.452	3.336	3.611	3.752	3.251	2.716	3.028
1552693_at	ARL11	2.514	2.016	2.151	2.803	2.116	2.353	2.211	2.361	2.053	2.252	2.074	3.335	2.296	2.815	2.084	2.703	2.387	2.155	2.567	2.397	2.098	2.124	1.945	2.236	2.742	2.397	2.652	2.388	2.583	2.47	2.181	2.191	2.486	2.25	1.841	2.193	2.145	2.372	2.027	1.845	2.546	1.882	2.258	2.372	2.267	2.142	2.119	2.49
242727_at	ARL5B	2.311	2.178	2.311	2.2	1.887	2.398	2.336	2.317	2.081	2.595	2.095	1.935	2.084	1.999	2.297	2.505	2.5	2.167	2.024	2.507	2.229	1.872	2.042	2.03	2.39	2.391	2.244	1.9	2.182	2.065	2.103	2.532	1.912	2.333	2.647	2.476	2.494	3.33	2.407	2.296	2.113	2.484	1.621	2.65	2.395	2.152	2.311	2.293
223735_at	ARL6	1.948	1.637	2.08	1.92	1.957	2.24	1.807	2.247	1.962	1.917	2.213	1.662	1.985	1.61	2.087	1.776	1.626	1.916	1.673	2.11	1.709	1.959	1.915	1.647	2.175	1.936	2.168	2.078	1.852	2.098	1.655	1.491	2.043	2.184	2.34	2.254	2.141	1.979	2.025	2.025	2.024	2.296	1.72	1.986	2.033	2.328	1.737	1.923
235320_at	ARL6	2.386	2.119	2.771	3.191	2.388	3.827	2.186	2.467	2.639	2.983	3.321	1.919	2.271	2.474	2.771	2.637	2.736	3.232	2.311	2.164	2.217	2.829	2.515	2.35	2.526	3.403	2.286	2.445	2.495	2.163	2.161	2.668	2.663	2.429	3.478	2.726	2.844	2.545	3.039	3.129	2.564	3.892	2.329	2.62	2.659	2.954	3.425	2.278
219335_at	ARMCX5	4.282	4.405	4.668	4.154	4.543	5.623	4.126	4.854	4.682	5.407	4.735	3.115	4.56	4.307	5.091	4.793	4.723	4.892	5.03	4.592	4.559	5.095	5.095	3.724	4.279	4.899	5.18	4.404	4.26	4.134	4.148	4.929	4.335	4.953	5.57	5.084	5.087	5.156	5.086	5.182	3.877	5.807	4.287	3.852	4.926	5.364	5.674	4.497
242520_s_at	ARMH1	4.456	5.15	4.674	4.803	4.506	5.425	4.416	5.266	5.976	5.749	5.34	5.309	4.664	5.072	5.222	5.43	4.648	5.715	5.225	4.451	5.175	4.353	5.277	5.614	5.552	5.524	5.607	5.68	4.784	5.663	5.008	4.646	4.489	5.386	2.706	4.861	4.39	5.37	4.937	5.299	5.566	4.935	4.865	5.542	4.084	5.261	4.838	4.792
223695_s_at	ARSD	4.963	5.194	4.811	4.929	4.786	5.295	5.712	5.615	5.46	4.763	3.958	5.14	4.861	4.828	4.942	4.535	5.573	4.699	5.657	5.564	5.047	5.738	4.899	4.676	5.41	4.724	5.013	5.066	5.325	5.113	5.84	5.217	4.629	5.019	4.931	4.616	4.283	5.195	4.273	5.301	5.04	4.71	5.295	4.841	4.763	3.546	4.879	5.481
232423_at	ARSD	5.911	4.706	5.173	5.527	5.239	4.783	5.401	5.696	5.126	4.904	5.047	5.694	5.302	5.502	4.753	5.222	5.822	4.614	5.843	4.274	5.568	5.004	5.114	4.661	5.633	4.422	4.67	5.374	5.664	6.222	6.881	4.299	5.163	5.506	4.947	5.176	5.201	5.885	5.139	5.957	5.558	5.154	5.761	4.29	5.1	4.802	4.984	4.958
236533_at	ASAP1	5.87	4.962	4.995	5.795	4.302	3.905	4.981	5.18	4.485	4.488	4.479	6.082	5.282	5.795	4.424	5.842	5.348	4.863	5.6	4.675	5.871	4.545	4.394	6.288	5.785	5.112	4.827	5.771	5.003	4.757	5.783	4.354	5.786	5.11	4.789	4.472	4.772	5.346	4.375	4.957	5.321	4.251	5.483	5.418	4.636	4.186	4.852	5.021
212815_at	ASCC3	4.84	5.15	5.901	5.309	5.373	5.633	5.062	5.44	5.584	5.773	5.39	3.535	5.141	5.083	5.643	5.477	4.926	5.812	5.425	5.202	5.262	5.426	5.276	4.891	5.099	5.56	5.298	5.314	5.244	4.115	4.681	5.17	4.711	5.196	6.717	5.817	6.111	5.96	6.26	5.606	5.239	6.019	5.248	4.983	6.026	5.356	5.875	5.639
218554_s_at	ASH1L	3.999	4.375	3.922	4.349	3.362	3.589	3.264	4.443	4.096	3.651	3.89	4.435	4.046	4.622	3.864	4.447	3.347	4.84	4.685	4.05	3.763	3.244	3.724	4.371	4.083	3.762	3.721	4.287	3.82	4.219	3.47	3.513	4.138	4.139	4.147	3.987	4.464	3.334	5.018	3.48	4.737	3.283	3.505	4.854	4.024	4.273	3.405	3.935
225497_at	ATE1	4.921	5.408	6.007	5.7	5.662	6.156	5.342	5.947	5.445	6.33	6.174	3.965	5.51	5.372	5.855	5.883	5.538	6.299	5.714	5.563	5.474	5.712	5.613	4.762	5.223	6.56	5.672	5.293	5.486	4.646	4.843	6.189	5.128	5.624	7.038	6.191	6.354	6.031	6.224	5.912	5.001	6.864	4.823	5.386	6.562	5.99	6.346	5.556
234874_at	ATE1	2.326	2.485	2.446	2.213	2.355	2.057	2.385	2.388	2.307	2.227	2.486	2.384	2.509	2.366	2.003	2.153	2.148	2.384	2.065	2.137	2.142	2.126	2.243	1.947	2.376	2.083	2.148	2.16	2.397	2.641	2.38	2.181	2.18	2.163	2.313	2.687	2.471	2.357	2.471	2.829	2.306	2.372	2.449	2.906	2.418	2.812	2.207	2.361
216208_s_at	ATF6B	3.179	3.298	3.325	3.054	3.259	2.838	3.083	2.816	3.357	3.096	3.778	3.981	3.1	3.083	3.13	3.445	3.053	3.242	3.21	2.939	2.947	2.951	3.011	3.462	3.409	2.64	3.15	3.834	3.296	3.192	3.563	2.836	3.232	2.897	2.439	3.662	3.218	3.799	3.476	3.468	3.87	3.247	3.736	3.829	3.207	3.828	3.483	3.13
1559485_at	ATG2B	2.426	2.305	2.244	2.535	2.663	2.113	2.437	2.758	2.341	2.027	2.893	2.896	2.473	2.614	2.307	2.341	2.847	2.225	3.087	2.13	2.201	2.236	2.161	2.485	2.234	2.258	2.136	2.69	2.13	2.495	2.216	2.374	2.501	2.102	2.332	2.227	2.374	2.358	2.08	2.223	2.381	2.111	2.214	2.672	2.595	2.503	2.241	2.335
219164_s_at	ATG2B	4.2	4.794	5.452	4.953	5.181	5.473	5.081	4.937	5.301	4.955	4.338	3.864	4.76	4.514	5.429	5.173	4.724	5.072	5.415	4.011	4.153	4.725	5.266	4.076	4.251	4.958	4.729	4.66	5.15	3.337	3.677	5.257	4.44	4.91	5.778	4.626	5.606	5.241	5.309	4.688	4.098	5.424	4.308	4.002	5.368	4.822	5.021	5.326
213582_at	ATP11A	4.233	3.424	3.523	3.492	3.189	3.753	3.689	3.853	3.56	3.427	3.088	3.52	3.528	3.006	3.811	3.146	3.781	3.575	3.534	4.323	2.832	3.827	4.114	3.011	3.473	3.377	3.457	3.198	3.972	2.685	3.901	4.742	2.8	3.524	3.975	3.536	3.428	4.436	3.521	3.74	3.226	3.733	2.987	3.27	3.405	4.452	3.799	3.6
215842_s_at	ATP11A	3.091	3.24	3.263	3.755	2.804	2.794	2.559	3.463	2.918	3.032	3.009	3.598	3.17	3.38	2.693	3.338	2.847	3.75	3.261	2.853	3.223	2.703	2.519	3.18	2.676	2.603	2.818	2.868	2.714	3.303	3.07	2.941	2.857	3.387	3.174	3.161	3.787	3.125	3.405	3.202	3.683	2.788	3.097	3.213	3.009	2.999	2.722	3.132
216488_s_at	ATP11A	4.919	3.628	4.417	4.301	3.32	3.782	3.866	4.332	4.126	4.292	4.37	4.618	3.591	4.638	4.543	4.371	4.566	4.895	4.488	3.482	4.152	3.436	4.068	4.084	4.285	4.297	4.445	4.038	4.509	3.519	3.419	4.621	3.437	4.649	4.404	4.688	4.495	4.667	4.23	3.805	4.374	3.188	4.032	4.368	4.501	4.508	3.713	4.231
241603_at	ATP11A	2.609	2.337	2.428	1.892	2.378	2.497	2.455	2.146	2.73	2.685	2.438	2.742	2.335	2.432	2.252	2.549	2.672	2.249	2.542	2.964	2.684	2.503	2.219	2.836	2.507	2.142	2.66	2.833	2.587	2.739	2.851	2.435	2.586	2.754	2.235	3.092	2.035	2.885	2.308	2.639	2.757	2.408	2.998	2.52	2.75	2.757	2.813	2.349
226785_at	ATP11C	5.323	6.178	6.664	6.412	6.493	7.576	6.306	6.643	6.324	7.455	7.086	4.588	6.398	6.115	6.694	6.746	6.395	6.832	6.877	6.258	6.549	6.703	6.246	5.191	6.275	7.09	6.48	5.85	6.145	5.694	5.42	6.659	5.421	6.292	7.701	6.708	7.022	7.287	7.483	6.901	5.306	7.416	4.689	6.178	6.837	7.2	7.292	6.488
242690_at	ATP11C	2.547	2.31	2.129	2.019	2.57	1.985	1.855	1.963	2.266	2.015	2.029	2.499	1.855	1.966	2.207	2.34	2.545	2.07	2.145	1.991	1.974	2.381	2.263	2.342	2.161	1.912	2.347	1.951	2.123	2.115	2.043	2.138	1.682	2.292	1.844	2.159	1.923	2.016	2.501	2.057	2.236	1.817	1.986	2.052	2.007	2.01	1.771	2.512
226570_at	ATP1B3	3.014	2.388	2.908	2.222	2.369	2.464	2.757	2.571	2.733	2.603	2.373	3.337	2.666	2.513	2.59	2.553	2.589	2.683	2.578	2.561	2.913	2.724	2.626	2.861	2.943	2.601	2.786	2.338	2.753	2.97	2.336	2.522	2.746	3.026	2.836	2.581	2.235	2.948	2.262	2.939	2.565	2.601	2.592	2.899	2.528	3.532	2.336	2.812
213042_s_at	ATP2A3	4.306	3.731	3.934	3.934	3.849	3.046	4.593	3.654	4.158	4.19	3.989	4.918	3.478	3.856	3.835	3.957	4.15	3.827	4.037	2.941	4.069	3.443	3.703	3.947	4.053	3.796	3.911	4.512	4.064	4.724	4.18	2.824	3.874	3.063	3.068	4.124	4.376	3.039	4.685	3.708	4.444	3.911	4.03	4.39	4.117	3.954	3.616	4.198
243501_at	ATP5PB	2.607	2.507	2.783	2.779	2.592	3.123	2.346	2.873	2.459	3.44	3.368	2.738	2.753	2.66	2.688	2.258	3.019	2.898	2.994	2.961	2.334	3.095	2.187	2.502	2.308	3.203	3.205	2.489	2.679	2.475	2.444	2.66	2.42	2.369	3.533	2.702	2.545	3.19	3.392	2.91	2.879	3.627	2.593	2.59	2.82	2.772	2.948	2.267
201171_at	ATP6V0E1	5.441	4.951	4.781	5.071	4.943	6.296	6.169	4.859	5.116	5.655	5.286	5.564	5.44	4.585	5.802	5.118	6.071	4.745	5.081	5.142	5.318	5.19	5.916	4.55	5.912	6.091	5.298	4.906	5.604	5.731	4.919	6.21	4.7	5.405	5.619	4.861	3.104	5.508	3.385	5.229	4.788	5.313	5.438	5.895	4.001	7.182	5.315	5.559
214149_s_at	ATP6V0E1	6.498	6.902	6.128	8.08	8.63	8.37	8.776	7.455	8.003	6.671	6.922	6.614	8.267	6.056	7.939	6.458	8.271	6.491	6.417	8.472	6.69	8.231	7.878	6.586	8.273	6.603	6.705	6.957	8.468	6.827	8.253	8.483	6.494	7.897	7.781	6.479	7.235	7.948	7.354	8.292	6.25	8.066	7.907	6.793	6.645	6.795	8.317	8.244
214244_s_at	ATP6V0E1	4.798	3.982	3.528	4.27	5.027	5.302	5.359	3.689	4.686	4.332	5.079	4.675	4.496	3.979	4.701	3.847	5.068	3.622	3.979	5.15	3.82	4.662	5.065	4.271	4.084	4.645	4.401	3.869	4.838	4.496	4.081	5.428	4.188	4.248	4.689	4.354	3.683	4.379	3.903	4.059	4.129	4.485	4.223	4.773	3.868	5.827	4.366	4.403
1569773_at	ATP8A1	1.984	2.162	1.848	3.053	1.995	1.8	1.78	2.192	1.91	2.205	1.737	2.448	2.295	2.483	2.275	2.665	2.351	2.361	2.76	1.955	1.94	1.718	1.873	1.972	2.025	2.239	2.087	2.075	1.852	2.489	1.808	1.944	2.02	2.219	2.325	2.147	2.195	2.404	2.484	2.099	2.068	1.882	1.985	2.551	2.227	1.811	1.801	1.862
210192_at	ATP8A1	2.835	3.22	2.849	3.208	2.776	2.843	2.317	2.352	3.073	2.773	2.842	3.009	2.367	2.989	2.811	2.981	2.243	3.174	3.442	2.861	2.84	2.713	2.941	2.603	2.684	2.676	2.787	2.716	3.108	2.619	2.611	2.949	2.874	2.769	2.88	2.878	3.026	3.323	3.247	2.795	2.703	2.717	3.178	2.557	2.449	3.476	3.227	2.649
213106_at	ATP8A1	6.163	6.625	7.506	7.219	7.133	8.251	6.709	7.323	7.415	8.387	8.062	5.593	6.992	7.007	7.72	7.841	7.474	7.919	7.74	7.569	7.347	7.712	7.335	5.855	6.926	7.934	7.673	6.909	6.766	6.705	6.098	7.882	6.454	7.339	8.895	7.49	8.146	8.102	8.398	7.835	6.355	8.352	5.965	7.048	7.844	8.086	8.496	7.446
1568723_at	ATP9B	2.421	1.951	1.964	2.065	2.436	1.952	1.839	2.188	2.051	2.117	2.546	2.301	2.071	2.176	2.09	1.903	2.567	1.96	2.209	2.315	2.303	2.041	1.813	2.236	2.591	2.296	1.998	2.246	1.897	2.29	2.207	2.026	2.258	2.168	2.219	1.842	2.326	2.172	1.996	2.199	2.191	2.022	2.243	2.292	2.152	1.86	2	2.38
225668_at	ATPSCKMT	5.452	4.507	5.181	5.578	4.844	4.962	5.196	5.954	4.395	4.773	4.816	4.568	5.957	5.692	4.696	5.4	5.447	4.564	5.625	4.769	5.303	4.559	5.23	5.447	5.63	5.831	4.565	5.169	4.966	5.453	5.201	4.584	6.543	5.948	5.405	4.81	4.995	4.506	5.015	4.352	5.322	4.66	4.397	4.96	4.562	4.372	4.494	4.783
208859_s_at	ATRX	7.665	7.868	7.225	8.498	7.321	7.614	7.614	8.775	7.219	8.581	6.893	7.072	8.167	8.271	6.836	8.228	7.245	8.227	8.916	6.707	8.392	6.392	6.936	7.359	7.625	7.19	7.633	8.046	7.34	5.6	6.065	7.102	8.553	8.203	8.824	7.318	8.011	6.48	8.249	5.492	7.54	6.368	4.056	6.904	7.239	7.32	6.64	7.737
211022_s_at	ATRX	2.786	2.876	2.908	3.51	2.677	2.684	3.117	3.711	3.284	3.34	3.124	3.139	2.904	3.942	2.243	3.798	2.806	4.34	3.88	2.481	2.907	1.951	2.452	3.292	3.191	2.643	3.128	3.28	2.69	3.1	2.272	2.635	3.95	3.373	4.294	2.414	3.198	2.27	4.489	2.475	3.429	2.107	2.079	3.476	2.593	3.8	2.497	3.133
203231_s_at	ATXN1	8.161	7.803	7.846	8.337	7.346	7.299	7.76	7.553	7.722	7.07	7.551	8.759	8.625	7.543	7.768	7.875	7.862	6.916	7.996	5.886	7.574	6.921	7.909	7.127	7.596	6.256	6.076	7.529	7.34	6.034	7.592	8.251	8.074	7.906	7.465	7.539	7.324	4.8	7.797	7.244	7.509	7.815	7.664	7.519	7.847	5.844	6.343	8.208
230507_at	ATXN1	2.56	2.49	2.268	2.505	2.855	2.7	2.931	2.417	2.531	2.324	2.695	2.77	2.341	2.312	2.576	2.139	2.505	2.154	2.739	2.505	2.522	2.94	2.705	2.527	2.633	2.511	2.058	3.074	2.806	2.433	2.667	2.385	2.158	2.358	2.377	2.515	2.565	2.492	2.143	2.574	3.072	2.467	2.474	2.383	2.497	2.54	2.64	2.706
204092_s_at	AURKA	3.762	2.927	3.093	3.672	3.637	3.405	4.434	4.034	3.242	3.144	3.028	3.819	2.894	3.076	4.681	3.463	4.297	3.425	3.412	3.452	3.372	3.524	3.412	3.627	3.205	3.602	3.25	3.38	3.643	3.06	3.502	3.336	3.637	3.631	4.865	4.128	3.954	3.972	4.043	4.323	4.243	3.857	4.214	3.763	3.548	4.444	4.095	3.247
208079_s_at	AURKA	3.914	3.342	3.67	3.636	3.776	3.975	4.081	3.623	3.92	3.442	4.316	3.614	3.403	3.946	4.706	3.806	3.878	3.914	3.944	4.04	3.778	4.404	4.18	4.344	3.999	3.633	3.375	3.664	3.719	3.296	3.74	4.075	3.635	4.087	5.047	4.584	4.261	4.074	4.426	4.625	4.053	4.478	4.461	3.921	4.101	4.411	4.136	3.749
208080_at	AURKA	2.354	2.067	2.018	1.795	2.201	1.969	1.716	1.887	1.706	2.209	1.873	2.042	1.634	2.272	2.162	1.792	2.437	1.919	1.796	2.077	2.087	1.756	2.25	1.752	2.236	1.751	1.74	2.211	1.835	2.395	2.067	1.902	2.21	2.451	2.21	2.379	2.234	2.173	1.714	2.09	2.409	2.099	2.108	2.016	2.178	2.072	1.865	2.036
213747_at	AZIN1	2.945	2.578	2.951	2.58	2.527	2.442	2.541	2.276	2.4	2.588	2.777	2.774	2.185	2.709	2.275	2.452	2.289	2.437	2.36	2.281	2.444	2.286	2.899	2.48	2.289	2.623	2.502	2.499	2.524	2.475	2.703	2.763	2.24	2.295	2.571	3.284	2.415	2.545	2.696	2.922	2.555	2.27	2.532	2.71	2.869	2.427	2.861	2.638
227083_at	B3GLCT	2.886	2.417	2.811	2.984	2.845	3.723	2.759	3.389	2.982	2.948	3.338	2.885	2.613	2.755	3.252	2.974	3.238	3.348	2.661	3.264	2.959	2.148	2.561	2.818	2.87	3.899	2.82	2.755	3.218	2.355	2.438	3.997	2.958	3.287	3.19	3.812	2.679	3.389	4.042	2.954	2.683	3.724	2.5	2.491	3.103	2.767	3.27	2.731
227100_at	B3GLCT	4.036	4.571	4.597	4.135	4.833	4.656	4.459	4.086	4.805	5.047	4.295	3.941	4.963	3.637	3.319	3.524	4.314	4.489	4.725	3.938	3.272	5.263	4.538	3.44	3.126	3.49	4.791	3.45	3.691	4.667	4.117	3.636	4.376	3.464	4.681	4.454	5.208	4.72	3.727	5.093	3.764	6.234	4.278	4.002	4.23	5.137	4.504	4.051
217867_x_at	BACE2	5.668	6.265	5.651	5.982	6.068	5.975	6.528	6.526	5.886	5.745	6.006	5.124	6.123	6.279	5.905	5.797	5.467	6.135	6.193	6.509	5.894	6.056	6.169	5.577	6.356	6.661	5.951	5.343	5.99	6.498	5.281	5.573	6.373	6.849	4.494	5.03	5.6	5.038	5.769	5.516	5.223	5.15	6.426	5.595	5.271	6.643	5.415	5.927
222446_s_at	BACE2	4.739	5.144	4.718	4.189	5.125	5.023	5.593	5.224	5.481	4.583	5.105	4.256	4.535	4.957	4.941	4.952	4.657	5.019	4.903	6.008	4.699	5.762	5.875	4.589	5.071	5.471	4.871	4.573	4.55	4.774	4.054	4.937	4.939	6.211	3.249	4.431	4.704	4.188	4.616	5.182	3.563	4.717	5.392	4.114	4.838	5.729	5.329	5.361
227051_at	BACE2	2.062	2.349	2.433	2.175	2.588	3.234	3.036	3.136	2.413	2.513	2.547	2.1	2.54	2.577	2.497	2.396	2.555	2.635	2.963	3.529	2.339	2.346	2.511	2.296	2.513	3.623	2.715	2.267	2.598	2.591	2.32	2.941	2.698	3.436	2.348	2.518	2.434	2.579	2.707	2.577	2.248	2.46	2.26	2.536	2.791	2.827	2.966	2.178
205293_x_at	BAIAP2	3.65	3.609	3.098	3.254	3.167	3.209	3.068	3.39	3.448	3.11	3.602	3.395	3.679	2.9	3.033	3.018	3.052	3.167	3.468	3.506	3.692	3.33	3.254	3.398	3.561	3.175	3.491	3.415	4.063	4.229	3.848	3.812	3.711	3.182	3.161	4.031	3.547	3.626	3.337	3.894	3.207	3.534	4.152	3.716	3.28	3.114	3.253	3.397
209502_s_at	BAIAP2	4.002	3.296	3.23	2.961	3.515	2.514	4.138	4.109	4.105	3.634	3.398	3.781	3.644	3.568	3.168	3.249	3.624	3.374	3.851	4.116	4.493	4.141	3.591	3.868	3.638	3.621	3.784	3.66	4.288	3.776	4.706	3.982	4.118	3.376	3.454	3.354	2.543	3.435	3.081	3.511	3.005	3.37	4.227	3.367	3.091	3.138	3.128	4.087
1558662_s_at	BANK1	6.315	7.112	7.332	7.252	6.872	7.811	7.272	8.035	7.775	7.973	7.072	5.907	7.586	7.85	7.663	8.029	7.786	7.757	7.977	7.692	6.177	7.425	7.891	6.579	7.817	7.743	6.833	7.644	7.085	6.508	5.424	7.205	7.675	7.738	7.221	6.293	7.785	6.475	8.347	7.272	6.379	6.797	6.769	6.06	6.761	8.206	6.91	7.523
219667_s_at	BANK1	6.107	6.861	7.618	6.969	7.243	8.086	7.357	7.868	7.701	8.152	7.094	5.275	7.673	7.483	7.714	8.052	7.791	7.542	7.78	8.084	6.225	7.536	8.043	6.673	7.806	7.927	7.046	7.482	7.127	6.301	5.147	7.228	7.602	7.797	7.419	6.508	7.769	6.802	8.351	7.391	6.315	7.017	6.85	6.361	6.952	8.142	7.248	7.459
222915_s_at	BANK1	5.658	6.336	6.515	6.517	5.689	5.734	6.174	7.464	6.368	6.878	5.851	5.484	6.928	7.593	5.496	7.477	6.28	6.412	7.225	5.921	5.974	5.438	6.398	6.588	7.358	6.316	6.071	7.297	5.761	5.948	4.228	5.602	7.351	7.086	5.876	5.415	6.314	4.342	6.468	4.791	6.033	4.382	5.16	5.412	5.729	6.541	4.989	6.501
232885_at	BBIP1	5.866	4.644	5.101	5.643	5.179	5.272	5.752	5.976	4.428	5.323	5.189	5.023	5.8	6.149	5.159	5.688	5.627	5.161	5.485	5.404	5.198	4.789	5.58	5.298	6.496	6.121	4.44	5.571	5.586	6.175	5.008	4.986	5.895	6.067	5.299	4.641	4.901	4.016	4.786	4.231	5.545	4.635	5.05	5.008	4.549	5.144	3.98	4.479
229603_at	BBS12	2.886	3.628	3.941	3.391	3.682	3.817	3.426	3.41	3.24	3.674	3.195	2.851	3.619	2.51	3.127	3.577	3.229	3.874	3.336	3.581	3.147	3.42	3.743	2.927	2.87	3.554	3.423	2.876	3.059	3.47	2.777	4.057	3.024	3.006	4.786	3.746	4.267	4.14	4.15	3.999	3.148	4.408	3.211	3.298	3.713	3.85	4.054	3.157
219688_at	BBS7	2.685	2.753	2.704	2.816	3.018	3.704	2.614	3.133	2.729	3.085	2.378	2.169	2.457	2.606	2.458	2.601	2.867	2.738	2.604	1.905	2.303	2.689	3.128	2.35	2.463	2.625	2.482	2.461	2.241	2.495	2.625	2.726	2.492	2.475	4.383	2.58	3.342	2.918	3.223	3.267	2.566	3.745	2.609	2.583	3.234	3.159	2.717	2.68
235007_at	BBS7	2.556	2.633	3.037	3.12	3.095	4.268	3.191	3.101	2.93	3.674	3.624	1.919	2.995	2.988	3.357	3.59	3.256	3.821	3.435	3.435	3.519	3.352	3.061	2.725	3.218	3.707	3.084	2.646	2.993	3.144	3.12	3.963	2.659	3.081	5.657	3.595	4.188	3.701	4.077	4.075	2.989	4.865	2.776	2.899	3.684	3.534	3.603	3.352
1557239_at	BBX	4.926	4.997	5.8	5.857	5.693	6.077	5.257	6.232	5.983	6.095	5.93	3.947	5.378	4.878	5.838	5.366	5.356	5.358	5.32	4.859	4.403	4.988	5.492	4.556	5.116	6.474	5.964	4.973	5.333	4.386	4.743	5.462	5.138	5.457	5.589	5.349	5.36	5.378	5.149	5.632	4.475	6.301	4.338	4.228	5.802	5.483	5.691	5.494
205084_at	BCAP29	2.289	3.419	3.542	3.912	3.197	3.679	3.426	4.141	3.424	4.406	3.417	3.238	3.722	3.549	3.473	4.327	3.634	4.034	3.896	3.253	4.368	3.373	2.953	3.329	4.151	3.514	3.832	4.03	3.208	2.838	2.919	3.367	3.521	3.806	5.327	3.63	4.254	3.376	4.356	3.54	3.623	2.988	2.398	3.65	3.399	3.653	3.724	3.491
225677_at	BCAP29	4.886	5.12	5.368	5.139	5.486	6.322	4.964	5.393	5.08	6.045	6.357	4.381	5.351	4.745	5.442	5.474	5.341	5.763	5.437	5.696	5.96	5.639	5.293	4.384	5.713	5.868	5.602	5.724	4.521	4.985	4.816	5.759	4.71	5.25	6.453	5.994	6.123	6.342	6.228	6.265	4.487	6.554	4.95	5.481	5.884	5.883	6.095	5.25
1557257_at	BCL10	5.271	4.421	3.95	5.147	4.274	4.071	4.71	5.39	4.47	5.248	4.527	4.637	5.715	4.655	4.377	4.525	4.734	4.876	5.651	4.502	4.504	3.455	4.403	3.994	5.16	4.901	5.121	4.874	5.054	4.472	3.655	4.507	5.082	4.982	4.527	3.572	4.329	4.101	4.581	3.416	4.575	4.336	3.834	4.335	3.815	4.158	3.604	4.561
215990_s_at	BCL6	6.964	6.833	5.938	7.751	5.732	6.236	6.666	6.717	5.938	6.139	6.02	7.432	6.983	5.635	5.571	5.901	6.559	5.889	7.163	5.676	5.795	5.368	5.51	6.205	5.826	6.277	6.906	6.341	6.631	5.065	6.462	5.575	5.957	6.316	5.548	5.747	6.373	8.052	6.263	5.176	6.199	6.567	6.444	6.189	5.751	5.543	5.787	6.711
232087_at	BCLAF3	3.599	3.356	2.881	4.179	3.292	4.522	3.616	3.445	3.322	4.464	4.363	3.426	4.036	3.293	3.936	3.654	3.816	3.127	3.37	3.845	4.338	3.542	3.423	2.954	3.475	4.387	4.408	3.842	3.782	3.429	3.527	4.332	2.507	3.516	4.877	3.621	4.014	4.504	4.42	4.039	3.411	4.468	3.134	3.856	3.778	4.271	4.115	4.017
221530_s_at	BHLHE41	3.084	3.098	3.644	4.099	3.428	3.566	4.107	4.241	3.519	3.973	3.495	3.016	3.841	3.715	5.301	4.989	3.721	4.052	3.858	3.651	3.037	3.625	4.153	3.765	3.434	3.568	3.519	3.609	3.958	3.552	3.184	3.303	3.506	3.853	4.111	3.504	4.945	2.907	6.263	4.297	3.79	3.617	3.932	3.167	4.196	4.204	3.922	3.711
223185_s_at	BHLHE41	1.589	1.561	1.785	2.346	1.643	1.466	2.42	2.242	1.731	1.757	1.83	2.222	2.171	2.134	1.57	2.138	2.016	1.668	1.83	1.904	1.552	2.205	1.819	2.116	1.8	1.782	1.562	1.915	1.693	1.639	1.7	1.898	1.935	1.869	1.85	1.694	2.139	1.632	2.202	1.918	1.541	1.635	1.862	1.593	1.533	2.012	1.641	1.682
231242_at	BHLHE41	1.768	1.798	1.849	1.946	1.927	1.878	1.794	1.845	2.055	1.751	2.177	2.336	1.704	1.915	1.952	1.998	2.012	1.992	1.97	2.502	2.12	1.911	1.984	1.927	1.851	1.721	1.795	1.792	2.059	2.329	2.387	2.216	1.582	1.618	1.944	1.796	1.769	2.206	1.894	1.992	2.407	1.74	2.077	1.672	1.705	1.927	1.771	2.295
231243_s_at	BHLHE41	2.335	2.242	2.002	2.212	2.338	2.191	2.019	2.073	2.228	2.146	2.389	2.653	2.299	2.206	2.177	2.246	2.158	2.07	2.042	2.13	2.265	2.201	2.486	2.434	1.945	2.105	2.013	2.386	1.963	2.927	2.489	1.881	2.135	2.29	2.039	2.449	2.368	2.623	2.333	2.35	2.487	2.432	2.671	2.4	2.418	2.499	2.155	2.126
209203_s_at	BICD2	7.846	7.229	7.333	7.931	5.722	6.288	6.998	7.495	6.45	7.125	6.738	8.014	7.486	7.534	6.396	7.373	7.391	7.725	7.819	5.967	6.906	5.486	6.321	7.196	7.007	7.337	7.331	8.013	7.253	6.491	5.912	6.414	7.006	7.072	6.92	7.025	6.884	5.807	7.013	5.059	7.723	5.173	5.573	7.059	7.015	6.454	5.021	7.116
215015_at	BICDL1	3.611	3.515	3.493	3.114	3.32	3.302	3.123	3.027	3.386	3.336	3.537	3.453	3.116	3.377	3.129	3.16	3.493	3.398	3.252	3.083	3.234	3.164	3.113	3.636	2.908	2.712	3.425	3.28	3.466	3.764	3.634	3.139	3.299	3.084	3.108	3.906	3.844	3.848	3.402	3.671	3.816	3.391	3.692	3.908	3.239	3.642	3.613	3.415
1555826_at	BIRC5	3.318	3.238	3.316	3.046	3.046	2.741	3.232	2.967	3.095	3.31	3.303	3.371	2.928	3.335	3.337	2.96	3.31	3.1	3.1	2.749	3.048	2.993	3.13	3.513	3.177	2.89	3.378	3.449	3.436	3.407	3.262	2.925	2.881	3.185	3.232	3.382	3.525	4.167	3.674	3.473	3.581	3.144	3.625	3.515	3.399	3.982	3.232	3.357
202094_at	BIRC5	2.97	2.815	2.876	3.037	2.743	2.471	3.115	2.912	2.968	2.65	2.97	2.715	2.803	2.847	3.086	3.161	2.765	2.544	2.523	2.685	2.837	2.948	2.929	3.076	2.746	2.88	2.817	2.799	2.987	2.956	3.357	2.968	3.125	2.911	3.279	3.111	2.733	2.949	3.123	3.11	3.236	2.953	3.061	2.999	3.173	3.596	3.164	2.512
202095_s_at	BIRC5	3.997	2.886	3.11	3.176	2.799	3.563	4.496	3.356	3.515	3.646	3.487	3.357	2.669	3.839	5.792	4.504	2.803	3.046	3.498	3.774	3.541	3.915	3.807	4.139	4.07	3.786	2.941	2.784	3.625	3.625	2.999	3.457	3.238	3.293	4.628	3.615	4.059	3.168	4.363	4.722	4.229	4.031	4.857	3.813	4.339	5.224	3.539	3.635
210334_x_at	BIRC5	4.322	4.138	3.235	3.534	3.605	3.134	4.209	3.538	3.571	3.418	3.865	3.874	3.421	4.129	4.701	3.989	3.47	3.534	4.01	3.726	3.805	3.827	4.065	4.495	3.454	3.49	3.713	3.556	3.952	4.209	3.738	3.842	3.646	3.65	4.219	3.939	4.202	3.851	3.984	4.069	3.895	3.683	4.318	4.184	4.082	4.504	3.738	3.623
222761_at	BIVM	4.01	4.171	5.377	5.09	4.759	5.599	5.013	5.216	5.179	5.218	5.611	4.274	4.322	4.253	5.288	4.937	4.498	5.426	5.19	4.464	4.945	5.222	5.044	4.209	4.317	5.111	5.415	4.723	4.734	3.854	3.825	4.935	4.241	5.11	5.589	5.501	5.914	4.88	5.937	5.461	4.544	5.958	4.318	4.518	5.683	5.833	5.725	4.218
229478_x_at	BIVM	2.022	2.075	1.931	2.005	2.052	1.878	2.477	2.013	1.843	1.927	2.082	1.824	1.658	1.838	1.918	1.786	1.801	1.763	2.448	1.474	2.185	1.574	1.857	1.895	1.687	2.011	1.934	1.701	1.976	1.902	2.239	2.235	1.716	2.121	2.153	1.966	2.154	1.868	2.183	1.824	1.893	2.073	1.913	1.875	1.928	1.924	1.929	2.085
229589_x_at	BIVM	2.002	2.347	2.077	2.25	2.44	2.681	2.332	2.237	2.019	2.373	2.248	2.254	2.148	1.907	1.937	2.19	2.355	1.922	1.981	2.272	1.985	2.272	2.357	1.837	2.577	2.561	2.086	2.449	2.01	1.763	1.87	2.533	1.989	2.178	2.467	2.276	2.207	2.212	1.996	2.304	2.192	2.401	1.845	2.231	2.025	2.423	2.437	1.966
233255_s_at	BIVM	2.886	3.041	3.8	3.745	3.1	3.402	3.282	3.837	3.706	3.963	4.055	2.437	3.298	3.204	4.205	3.842	3.194	3.614	3.908	3.458	4.242	3.54	3.846	2.861	3.204	3.777	3.551	3.139	3.456	2.764	3.147	2.802	3.112	3.52	3.968	3.334	4.796	3.019	4.172	3.656	4.027	3.681	3.654	3.367	3.895	4.081	3.613	2.755
206255_at	BLK	4.865	5.711	6.042	5.946	5.973	6.257	6.42	5.997	6.415	5.517	5	4.835	6.231	5.92	6.594	6.594	6.461	6.068	6.127	6.287	4.655	6.041	6.247	6.057	6.13	5.844	5.514	6.092	6.042	6.112	5.043	4.916	6.32	5.789	5.062	4.856	6.189	4.8	7.091	6.252	5.502	5.397	5.377	5.217	5.607	5.929	5.509	5.297
210934_at	BLK	3.417	3.353	3.351	3.6	3.017	2.952	3.292	3.906	3.3	2.761	2.972	3.856	3.675	3.084	3.039	3.044	3.514	3.552	3.333	3.274	2.968	3.286	3.384	3.644	3.483	2.951	3.259	3.833	3.158	3.341	3.427	3.059	3.331	3.286	3.199	2.765	3.216	3.238	3.683	3.342	3.475	3.261	3.449	3.432	3.062	3.547	3.357	3.185
214716_at	BMP2K	2.11	2.196	2.219	2.52	2.342	2.299	2.471	2.616	2.194	2.476	2.109	2.104	2.569	2.606	2.254	2.392	3.127	2.365	2.601	2.557	2.798	1.978	1.952	2.209	2.413	2.455	2.164	2.681	2.457	2.109	2.272	2.8	2.508	2.911	2.386	2.253	2.1	2.366	2.391	2.239	2.771	2.233	2.086	2.275	2.397	2.011	2.734	2.568
232688_at	BMP2K	4.397	3.264	3.591	3.569	3.448	3.435	3.923	3.462	3.23	3.32	3.088	4.191	3.777	3.936	3.218	3.744	3.85	3.31	4.026	3.003	3.038	3.062	3.769	3.39	3.536	3.789	3.555	3.125	3.863	4.018	3.826	4.101	3.736	3.7	3.054	3.624	3.179	3.604	3.256	3.594	3.786	3.409	3.934	3.661	3.086	3.146	3.176	3.465
37170_at	BMP2K	2.897	3.302	2.429	3.833	2.9	2.863	3.944	3.852	2.524	2.993	2.629	2.688	3.232	4.533	3.224	4.111	3.55	3.794	4.096	2.965	3.448	2.27	2.288	2.822	3.638	3.05	2.605	3.579	2.866	2.356	2.533	3.128	3.288	4.309	3.155	2.317	2.358	2.302	2.981	2.318	3.134	2.463	2.135	3.477	2.816	2.714	3.053	3.064
204832_s_at	BMPR1A	2.103	2.021	2.394	2.464	2.56	2.752	2.044	2.356	2.22	2.449	2.689	2.157	2.743	2.168	2.616	2.41	2.007	2.688	2.184	2.818	2.249	2.375	2.632	2.23	2.312	2.61	2.686	2.208	2.707	2.696	2.382	2.611	2.401	3.09	2.414	2.321	2.541	2.193	3.018	2.65	2.311	3.527	2.361	2.312	2.764	2.924	3	2.209
213578_at	BMPR1A	2.973	2.798	3.605	3.313	4.04	4.152	2.932	3.572	3.228	3.308	3.733	2.894	3.596	2.889	3.446	3.168	3.314	4.064	3.164	3.325	3.218	3.701	3.191	3.06	3.592	4.091	3.057	3.52	2.95	3.256	3.237	3.323	2.783	3.659	4.072	3.405	3.951	3.677	4.091	3.722	3.139	4.884	2.81	3.114	3.726	3.857	3.447	2.918
227273_at	BMPR1A	3.243	2.187	3.693	3.706	3.781	3.796	3.636	3.748	3.32	3.632	3.987	2.836	3.377	3.085	3.314	2.885	2.755	3.534	3.136	3.23	3.104	3.449	2.824	2.974	3.138	4.055	3.411	2.832	2.797	2.886	2.887	3.281	2.703	2.911	3.853	3.867	3.19	3.461	3.902	3.497	2.661	4.27	3.066	2.997	3.818	3.575	3.184	3.429
235009_at	BOD1L1	7.018	7.904	4.959	7.811	5.737	5.723	6.817	7.735	5.316	7.397	4.469	7.404	7.655	7.955	4.519	7.31	6.519	6.612	8.285	5.257	7.284	4.163	5.106	7.619	6.495	5.046	6.928	7.891	6.748	3.429	4.723	5.697	8.341	7.252	6.916	5.401	6.277	4.469	5.725	3.069	7.522	3.184	2.796	6.167	4.924	4.667	3.935	6.585
242594_at	BOD1L1	4.905	5.09	2.952	3.263	3.042	3.327	4.584	2.423	5.271	2.673	3.121	2.956	5.973	4.049	4.534	4.025	5.21	3.934	4.636	3.245	2.011	2.388	1.845	3.59	3.104	2.753	4.759	4.021	5.395	2.87	5.25	5.634	2.53	3.135	2.82	3.752	2.79	3.209	3.8	3.763	3.907	3.841	4.1	2.447	2.942	2.207	3.358	4.702
226580_at	BRMS1L	3.795	4.342	4.837	4.153	4.508	5.257	4.079	4.671	3.983	4.904	5.29	3.546	4.177	3.694	4.509	4.262	4.072	4.687	4.332	4.498	4.438	4.241	4.309	4.133	3.8	4.981	4.463	4.209	3.73	4.269	4.16	4.348	4.181	4.152	5.342	4.725	4.757	4.937	4.969	4.754	4.123	5.217	3.404	4.354	4.797	5.022	5.135	4.368
1553227_s_at	BRWD1	3.579	3.715	3.824	3.785	3.305	4.339	3.5	4.032	3.808	4.218	4.358	3.089	3.547	3.762	4.631	3.813	3.662	4.22	3.629	3.155	3.502	3.609	3.432	2.317	2.967	3.891	4.001	3.745	3.53	3.015	2.724	4.075	3.17	3.739	4.59	4.084	4.241	3.92	4.32	3.897	3.204	4.825	2.893	2.995	3.975	4.279	4.36	3.496
214820_at	BRWD1	3.402	4.229	4.35	4.685	4.46	5.656	3.322	4.439	3.893	5.801	5.373	3.78	4.319	4.435	4.423	4.807	4.206	5.047	4.697	4.242	4.317	4.285	3.64	3.305	3.936	5.67	4.845	4.107	4.409	3.887	3.451	4.622	2.565	4.321	5.661	4.312	5.047	4.609	5.17	4.695	4.258	5.592	3.808	4.184	4.267	5.043	4.871	4.107
219280_at	BRWD1	3.718	3.617	3.66	3.852	3.146	4.463	2.841	4.129	3.518	4.456	3.266	3.662	3.29	3.474	3.972	3.691	3.627	4.068	4.056	2.681	3.661	3.231	3.329	3.341	3.353	3.808	4.197	3.454	3.542	2.675	3.012	3.493	3.527	3.434	4.697	3.661	4.55	3.989	4.45	3.345	3.517	4.13	2.672	2.985	3.798	3.632	4.087	3.355
231860_at	BRWD1	5.32	5.241	5.153	6.376	5.143	4.848	4.963	6.836	5.228	6.151	5.789	5.578	5.942	5.666	5.065	6.324	4.947	6.311	5.975	4.528	5.297	4.716	4.934	5.654	5.827	6.08	5.305	5.756	4.524	4.509	4.507	4.93	5.684	4.976	5.791	5.253	5.444	4.044	5.084	4.667	5.256	4.755	3.875	5.129	4.545	5.793	4.671	5.1
231960_at	BRWD1	3.891	4.381	4.441	4.023	4.445	5.442	3.809	4.163	4.245	5.157	5.082	2.981	4.107	3.885	4.489	4.262	4.092	4.755	4.31	4.246	4.443	4.136	4.4	3.461	4.312	4.696	4.21	3.989	4.099	4.065	3.762	4.404	3.843	4.327	5.043	4.633	4.725	4.587	4.6	4.492	3.67	5.582	3.711	4.031	4.473	4.636	4.773	4.184
238890_at	BRWD1	3.842	5.184	4.311	4.73	4.83	5.713	5.115	4.625	4.841	5.539	5.421	4.324	4.92	4.536	5.106	5.361	4.684	5.509	5.049	4.804	5.294	5.279	4.62	4.455	4.84	5.308	5.314	5.039	4.663	3.971	4.489	5.037	4.165	4.931	5.553	5.042	5.435	4.624	4.778	5.598	4.422	6.137	4.141	4.789	4.884	5.593	5.315	5.083
244622_at	BRWD1	4.343	4.249	4.349	4.416	3.862	3.653	3.797	4.61	3.712	4.252	4.027	4.039	4.602	5.291	3.495	4.41	3.864	4.273	5.194	4.109	4.348	3.9	4.064	4.079	4.446	4.478	3.912	4.591	3.613	4.301	3.525	4.044	4.791	4.465	4.601	3.757	3.983	3.401	3.233	3.389	4.583	2.964	3.625	4.178	3.222	3.867	3.378	3.707
1553252_a_at	BRWD3	6.282	6.8	5.756	6.799	4.935	4.525	5.715	6.488	5.211	6.156	5.491	7.198	6.433	7.627	4.214	6.92	5.823	6.883	7.516	5.485	6.707	4.782	5.503	7.012	7.22	6.014	5.572	7.224	5.169	5.547	4.447	4.286	6.951	6.52	6.23	5.591	5.7	4.222	6.076	3.99	6.956	3.204	4.013	6.494	4.982	5.687	3.917	6.177
220297_at	BTBD7	2.452	2.247	2.494	2.739	2.572	3.129	2.186	2.492	2.347	3.027	2.364	2.289	2.666	3.502	2.72	3.167	3.506	2.607	3.161	2.508	2.579	2.714	2.994	3.012	3.515	2.562	2.463	2.721	2.867	1.93	2.181	2.415	2.511	2.772	3.005	2.713	2.687	3.026	2.824	2.72	2.572	2.477	2.233	2.437	2.093	2.728	2.584	2.84
224943_at	BTBD7	4.812	5.495	5.612	5.403	4.032	3.865	4.222	5.326	4.53	5.138	4.901	4.917	5.399	5.322	4.041	5.182	5.789	5.835	5.206	4.571	4.856	4.269	4.348	4.825	5.28	4.942	5.293	5.314	4.034	5.15	4.029	3.78	4.88	4.615	4.757	4.558	5.079	3.49	5.032	4.104	5.341	3.946	4.374	5.158	6.167	4.588	3.435	4.767
208585_at	BTN2A3P	3.002	2.966	2.929	2.664	2.966	2.524	2.238	2.349	3.259	2.704	3.39	2.935	2.515	2.681	2.76	3.063	2.893	2.733	2.583	2.689	2.976	2.963	2.782	3.335	2.551	2.558	2.944	2.969	2.36	3.575	3.331	2.777	2.82	2.883	2.735	3.462	3.43	3.101	3.473	2.777	3.63	2.989	2.952	3.314	2.688	3.139	2.953	3.004
209642_at	BUB1	2.909	2.288	2.815	2.751	3.266	3.152	4.334	3.067	2.799	3.067	2.491	2.512	2.592	2.841	5.159	3.739	2.978	2.599	3.504	2.67	2.644	2.818	3.121	3.658	2.491	2.976	2.628	2.65	3.171	2.558	2.15	2.747	2.873	3.69	4.26	3.708	3.663	2.74	4.543	4.044	3.246	3.246	3.706	3.438	3.244	4.173	2.999	3.275
215509_s_at	BUB1	2.113	2.043	2.136	2.432	2.284	1.878	1.939	1.946	2.084	1.81	2.194	2.091	1.775	1.919	2.325	2.058	2.736	1.863	2.003	2.2	1.763	1.965	1.857	2.025	2.084	1.945	1.747	2.669	1.936	2.177	2.26	1.997	2.373	2.504	2.21	2.213	1.797	2.206	2.003	2.177	2.191	1.929	2.145	2.033	2.036	1.923	1.955	1.979
216275_at	BUB1	3.397	3.041	2.777	2.8	3.107	3.022	3.11	3.093	2.858	2.465	3.27	3.245	2.688	2.898	2.99	2.37	2.929	2.712	2.946	2.846	2.589	2.911	3.137	3.192	2.801	2.582	2.593	2.62	3.216	3.03	2.7	2.504	2.715	2.952	2.747	3.106	2.733	2.9	2.515	3.359	3.036	3.05	3.141	3.307	2.883	2.796	2.737	2.604
218374_s_at	C12orf4	2.971	3.133	3.57	3.829	2.938	5.143	3.068	3.695	3.925	4.382	4.084	2.586	3.407	2.743	4.07	4.073	3.779	3.574	3.725	3.857	3.637	3.769	3.483	2.979	4.196	4.329	3.648	3.242	2.917	3.26	2.824	3.881	2.983	4.492	5.031	3.727	4.265	4.594	5.005	4.577	3.475	4.499	3.358	3.943	4.232	4.875	4.453	3.92
226943_at	C12orf73	3.409	4.314	4.289	3.958	3.714	5.151	3.848	4.248	4.436	4.944	5.134	4.029	4.276	3.768	4.576	4.534	4.447	4.504	4.328	4.224	4.43	4.628	4.709	4.193	4.63	5.547	4.406	4.135	4.19	4.455	4.155	4.486	4.187	4.484	4.875	4.68	4.968	4.504	4.782	4.97	3.934	5.338	4.263	4.298	4.463	5.094	5.238	4.153
218820_at	C14orf132	3.621	3.774	3.969	5.443	4.882	4.081	3.542	5.107	3.729	3.536	4.012	4.05	4.247	4.74	4.178	4.473	3.934	3.205	3.03	3.754	3.533	3.426	3.506	4.982	4.593	4.726	4.459	3.764	3.606	4.165	4.181	3.89	4.098	4.122	3.144	4.177	4.346	4.151	3.198	4.226	3.738	4.732	3.395	3.504	3.104	3.62	4.519	3.52
231859_at	C14orf132	3.528	3.404	4.026	4.869	4.049	3.889	3.887	4.147	4.219	4.042	4.288	4.221	4.073	3.982	4.02	4.093	3.695	3.428	3.122	3.883	4.146	3.784	3.608	4.898	3.891	4.496	3.783	3.541	3.64	4.385	4.167	3.229	3.861	4.564	2.798	3.633	3.975	3.355	3.651	3.611	3.679	4.075	3.647	4.129	3.62	3.802	3.98	3.737
215087_at	C15orf39	6.1	5.333	5.692	5.381	5.372	4.587	6.677	5.47	5.195	4.305	4.823	5.72	6.039	6.797	5.381	5.207	6.461	5.474	5.695	5.981	5.559	5.213	5.612	5.707	5.709	4.916	5.285	5.324	6.014	5.359	6.899	6.16	5.139	5.046	4.901	5.679	5.067	6.098	4.695	5.718	5.534	5.245	6.419	5.35	5.623	4.254	5.329	6.102
223484_at	C15orf48	2.369	2.567	2.072	2.217	2.742	2.513	2.992	2.32	2.124	2.634	2.707	2.603	2.503	2.366	2.764	2.864	2.4	2.387	2.49	1.978	2.905	2.583	2.649	2.499	2.645	2.317	2.227	2.222	2.163	2.513	2.219	2.669	2.733	2.506	5.513	2.334	3.134	2.633	2.697	3.202	2.264	2.899	2.562	3.209	2.474	2.938	2.64	2.716
230074_s_at	C16orf58	2.022	1.699	2.075	1.871	1.96	2.099	2.186	2.169	2.239	1.983	2.131	2.571	2.058	2	2.099	1.86	1.938	2.104	1.917	2.143	1.954	2.289	2.212	2.096	1.778	1.945	2.186	1.845	1.99	2.704	2.107	2.03	1.703	2.134	2.172	2.515	2.178	1.905	2.088	2.506	2.225	2.155	2.602	1.928	1.938	2.16	2.269	1.88
229442_at	C18orf54	3.994	4.118	4.452	4.191	4.847	5.46	4.48	4.697	4.526	4.798	5.425	4.298	4.755	3.795	4.054	4.627	4.519	4.066	4.338	4.613	4.526	4.383	3.992	4.129	4.73	4.911	4.196	4.161	4.285	5.069	4.482	4.925	4.349	5.109	5.525	4.939	5.341	4.252	4.69	5.463	4.744	6.28	4.392	4.681	5.363	5.035	4.907	4.053
241733_at	C18orf54	2.013	2.183	2.46	1.842	2.226	2.316	1.874	2.107	2.067	1.945	1.932	2.134	1.714	1.965	2.063	2.153	2.048	1.559	1.699	1.945	1.689	1.867	1.833	1.912	1.718	1.677	2.002	1.674	1.859	2.193	2.038	2.199	2.099	2.109	2.59	2.145	2.333	2.24	2.278	2.104	2.066	2.057	1.79	1.991	2.328	2.038	1.956	1.783
244324_at	C18orf54	2.639	3.004	2.703	3.266	3.458	3.305	3.463	3.069	2.949	3.549	3.285	2.953	3.174	2.792	3.333	3.06	2.689	3.056	2.755	3.096	2.671	3.541	2.952	2.735	3.164	2.986	2.948	3.247	2.785	3.085	3.216	3.044	2.356	3.311	3.768	3.234	3.153	2.971	3.255	4.012	3.154	4.442	2.993	2.898	3.764	3.341	3.662	2.936
219439_at	C1GALT1	5.016	3.989	4.907	5.035	4.714	5.98	4.836	4.342	4.423	5.093	5.161	4.457	4.7	4.91	5.068	5.066	4.575	5.193	5.098	4.446	5.096	4.887	4.902	3.856	5.326	5.262	5.23	4.708	4.977	4.279	3.697	5.753	4.605	5.548	6.029	5.04	5.64	5.913	5.753	4.936	4.189	5.574	3.856	4.861	4.912	5.287	6.435	4.631
238010_at	C1orf174	4.724	4.883	5.782	5.49	4.183	5.204	4.436	5.962	4.208	5.832	5.198	4.374	5.346	4.795	4.878	5.333	4.851	5.64	5.491	4.254	4.229	4.318	4.953	4.077	4.938	5.951	5.501	4.248	4.451	4.307	4.456	4.85	4.791	5.881	5.648	5.505	5.462	4.614	5.702	4.845	5.082	5.663	5.018	4.758	5.511	5.666	4.817	4.777
218232_at	C1QA	3.623	3.805	4.584	4.312	3.804	3.442	4.542	4.057	4.204	3.827	4.483	3.559	3.698	4.277	3.656	3.43	3.608	4.561	3.972	4.287	4.468	4.002	4.178	4.287	4.344	3.909	4.527	4.263	4.058	4.249	4.848	4.413	4.317	4.022	3.79	4.619	4.671	4.756	4.435	4.041	4.516	4.225	5.324	4.197	4.484	4.435	4.819	4.149
1569374_at	C3orf62	6.25	5.121	5.462	5.547	4.998	4.536	5.404	4.947	5.661	4.936	5.579	6.159	5.917	4.712	4.701	4.679	5.438	4.817	5.458	5.112	4.969	4.87	4.922	5.21	5.113	5.652	5.162	5.279	5.807	5.449	5.834	5.305	5.649	4.844	3.968	4.998	4.263	4.87	4.342	5.057	5.358	5.331	5.978	4.794	4.749	4.591	4.711	4.679
1552370_at	C4orf33	3.061	3.724	4.071	4.035	3.136	4.736	3.737	4.204	3.34	4.803	4.144	3.245	3.329	3.617	3.885	4.143	3.758	4.093	3.984	3.407	4.396	3.929	4.442	3.702	3.747	4.165	4.601	3.866	4.302	3.452	3.751	4.356	3.115	4.476	4.278	3.858	4.714	5.082	4.721	4.818	3.298	4.985	3.902	3.7	4.062	4.53	4.975	3.637
235088_at	C4orf46	2.433	2.661	3.404	2.671	2.029	2.681	2.297	2.644	2.481	3.391	2.9	2.369	2.262	2.104	2.245	2.655	2.376	2.492	2.652	2.957	2.639	2.419	2.308	1.837	2.042	2.897	2.983	1.958	2.045	2.388	2.269	2.274	2.495	2.721	3.262	2.571	2.999	2.816	3.7	2.573	2.504	3.708	2.023	2.197	3.345	3.761	2.654	2.209
238015_at	C4orf46	3.422	3.514	4.344	3.977	3.561	4.03	3.716	3.866	4.12	4.709	4.388	3.373	3.387	3.038	3.841	4.524	4.167	4.144	3.773	3.863	4.215	3.854	3.764	3.187	3.246	4.736	3.925	3.204	3.82	4.165	3.371	4.068	3.776	4.023	4.172	4.012	4.155	4.532	4.333	4.499	3.874	4.893	3.583	3.661	4.94	4.353	4.237	3.695
229260_at	C5orf15	2.28	2.013	2.275	2.167	2.257	1.875	2.192	1.868	2.235	2.323	2.191	2.583	2.345	2.273	2.129	2.395	2.127	2.004	2.121	2.052	2.399	2.615	2.376	2.353	2.219	1.973	2.033	1.934	2.196	2.304	2.256	2.382	2.361	2.297	2.276	2.444	2.275	2.551	2.106	2.177	2.336	2.17	2.734	2.248	2.262	2.24	2.216	2.425
221823_at	C5orf30	3.871	4.039	4.638	4.563	4.587	4.997	4.296	4.653	4.104	5.244	4.619	4.395	4.481	4.353	5.526	4.294	4.956	4.731	4.578	4.22	4.191	4.131	4.157	3.494	4.21	4.982	4.365	3.937	4.908	4.374	4.394	4.552	3.99	3.986	5.857	4.74	4.713	4.65	5.188	5.091	4.587	5.451	3.975	4.473	5.467	5.134	5.104	4.35
230404_at	C5orf63	2.806	2.728	3.313	3.703	3.532	3.526	2.531	3.548	3.901	4.118	3.22	3.055	3.135	4.005	2.812	3.386	2.664	3.552	3.691	3.126	2.917	2.233	2.952	3.314	3.703	3.517	3.119	3.865	2.43	3.111	2.905	3.252	3.038	3.588	3.462	3.462	2.846	2.745	3.112	2.878	3.344	3.012	2.886	2.914	2.948	3.882	3.063	3.134
233787_at	C6orf163	3.713	3.477	3.405	3.583	3.672	4.181	3.751	4.016	3.428	3.151	3.106	4.034	3.209	3.943	3.348	3.381	4.037	3.447	3.518	3.615	3.32	4.268	3.954	4.463	3.237	2.97	3.305	3.887	3.677	3.096	3.834	3.217	3.374	3.418	2.878	3.293	3.001	3.578	3.276	2.636	3.782	3.196	3.606	3.668	3.43	2.991	3.36	3.835
242446_at	C6orf163	3.216	2.2	2.514	3.424	2.447	2.438	2.932	4.496	2.879	2.118	2.968	3.238	3.521	3.993	2.391	2.846	3.28	2.623	3.418	2.326	2.732	2.185	2.273	3.303	2.858	3.082	2.48	2.554	2.399	2.735	2.54	2.382	3.698	2.883	2.841	2.661	2.479	2.483	2.655	2.245	2.602	2.684	2.113	2.651	2.595	2.273	2.288	2.508
1557961_s_at	C8orf88	3.79	3.95	3.334	4.05	5.206	4.025	4.49	3.401	3.878	3.514	4.318	4.817	4.505	3.342	3.31	3.225	3.567	3.234	3.203	3.549	3.805	3.474	3.576	3.844	3.153	3.724	3.879	3.535	4.627	3.261	3.681	4.375	3.643	3.291	3.442	3.456	2.834	3.679	2.973	3.671	3.059	3.804	3.01	3.796	2.88	3.979	3.443	4.249
228107_at	C8orf88	3.645	3.104	2.79	3.277	3.766	3.454	3.289	3.056	3.461	3.177	3.175	3.477	3.676	2.868	2.879	2.96	2.844	2.959	2.908	3.191	3.042	2.612	2.97	3.48	2.769	3.159	3.327	2.59	3.742	3.221	3.072	3.737	2.904	3.258	3.138	2.884	3.143	4.03	2.892	3.38	2.778	3.352	3.109	3.483	3.158	3.351	3.302	3.672
1553133_at	C9orf72	3.411	3.735	3.129	4.352	4.39	5.924	4.195	3.88	2.564	4.295	5.745	3.46	4.534	3.372	4.132	4.58	4.267	4.345	4.206	4.001	5.309	4.007	3.699	3.935	4.564	5.081	4.75	3.473	3.542	3.79	4.407	3.44	3.492	4.19	5.018	3.591	4.175	6.374	4.044	5.456	4.098	4.436	4.26	4.434	5.087	4.619	5.41	4.181
1553134_s_at	C9orf72	1.684	2.043	1.967	2.153	2.018	2.618	2.029	1.646	1.874	2.258	2.52	2.051	1.944	1.993	2.206	2.095	1.621	1.984	1.98	1.708	1.999	2.181	2.479	2.009	2.491	2.117	2.385	1.478	1.948	2.005	1.667	1.971	2.058	1.921	2.311	2.102	2.046	2.329	2.138	2.507	1.959	2.475	2.036	1.942	2.044	2.461	2.338	1.957
1558944_at	CACNA1A	1.832	2.265	2.246	1.901	1.954	2.016	1.645	2.04	2.104	2.202	1.883	2.338	1.834	1.834	1.819	1.759	2.109	1.76	1.926	1.941	1.871	1.822	2.175	1.916	1.955	2.037	2.176	1.532	1.9	1.873	1.816	1.911	2.215	1.941	1.953	1.913	2.02	1.809	1.962	1.917	2.128	1.904	1.708	1.939	2.03	2.051	1.996	2.323
210770_s_at	CACNA1A	2.754	2.418	2.151	2.547	2.532	2.414	2.79	2.209	2.294	2.428	2.679	3.013	2.55	2.319	2.511	2.564	2.41	2.251	2.252	2.479	2.271	2.181	2.304	2.622	2.542	2.29	2.423	2.45	2.102	2.569	2.997	2.793	2.023	2.908	2.384	2.174	2.977	3.083	3.386	3.144	2.82	2.783	3.489	2.882	2.678	2.689	3.1	2.381
214933_at	CACNA1A	5.802	5.164	4.653	5.825	5.696	5.172	6.046	5.498	4.657	5.471	4.087	4.072	5.015	5.225	5.098	5.606	5.314	4.762	5.913	6.139	4.411	5.061	5.531	4.943	5.424	5.623	4.69	5.326	4.933	4.852	4.534	6.068	4.745	6.367	5.474	4.237	5.15	5.867	5.763	5.488	5.263	4.712	5.003	4.64	5.369	5.35	5.604	4.554
1555993_at	CACNA1D	2.59	2.715	2.151	2.127	2.375	2.481	2.554	2.294	2.381	2.563	2.589	2.553	2.556	2.5	2.412	2.043	2.365	2.224	2.205	2.849	2.562	2.759	2.451	3.193	2.377	2.231	2.707	2.735	2.595	2.434	1.953	2.377	2.49	2.6	2.449	2.342	2.354	2.09	1.939	2.108	2.287	2.278	2.177	2.308	2.49	2.226	2.145	2.7
210108_at	CACNA1D	1.872	1.96	1.906	1.802	1.884	2.05	2.27	1.997	2.324	1.927	1.799	1.919	2.057	2.236	1.858	2.095	2.144	1.947	1.876	2.347	1.632	1.917	1.994	1.928	1.933	2.152	1.998	1.938	2.593	1.866	2.013	2.03	2.296	1.901	1.583	1.808	2.06	1.781	1.989	1.917	1.963	1.704	2.135	2.001	1.89	1.954	1.704	2.189
243334_at	CACNA1D	3.663	3.173	2.758	3.359	2.746	3.249	3.214	2.847	3.032	2.781	3.405	4.214	2.813	2.813	2.802	2.55	3.479	3.084	2.623	2.947	2.872	3.422	3.065	3.228	3.242	2.442	3.084	3.146	3.017	3.599	3.263	2.941	3.855	2.89	2.585	3.233	3.246	3.067	2.74	2.796	2.938	2.807	3.304	3.352	3.062	3.026	3.014	3.39
207869_s_at	CACNA1G	1.804	1.644	1.883	1.743	1.693	1.955	1.501	1.409	1.802	1.671	1.995	1.993	1.699	1.645	1.7	1.859	2.166	1.523	1.792	1.911	1.948	1.766	1.622	1.767	1.714	2.216	2.004	2.137	1.736	1.978	1.767	1.581	1.935	1.808	1.597	1.879	1.681	1.795	1.681	1.81	2.06	1.883	1.775	2.124	1.919	1.731	1.81	1.623
211314_at	CACNA1G	2.884	2.901	2.56	2.494	2.568	2.694	2.455	2.633	2.629	2.465	2.638	3.251	2.672	2.471	2.641	2.503	2.744	2.377	2.374	2.712	2.596	2.729	2.742	2.99	2.253	1.932	2.43	2.816	2.737	2.838	3.55	2.907	2.556	1.952	2.621	3.076	2.547	2.62	2.729	3.013	2.853	2.623	2.857	3.06	2.294	2.672	2.602	2.857
221631_at	CACNA1I	4.034	5.451	4.877	4.983	4.451	4.952	5.264	5.143	4.932	4.366	4.104	4.082	4.569	5.074	5.79	4.572	4.56	4.712	4.537	5.026	4.717	5.02	5.338	5.386	4.637	4.344	4.453	5.36	4.044	5.065	5.64	4.167	5.383	4.952	2.875	4.394	4.288	4.097	4.065	4.995	4.188	4.265	4.802	4.076	3.849	4.516	4.697	4.499
1560846_at	CACUL1	2.079	1.881	1.549	1.706	1.822	2.113	1.903	1.851	1.642	1.578	2.039	2.078	1.704	1.39	1.969	2.016	1.626	1.872	1.902	1.887	1.904	1.502	2.066	1.748	1.748	1.645	1.526	1.75	1.878	1.68	1.626	1.642	1.472	1.855	1.932	1.495	1.618	1.862	1.575	1.536	1.873	1.91	1.796	1.89	1.64	1.861	1.799	2.204
227136_s_at	CACUL1	2.878	2.577	2.668	2.751	2.584	2.563	2.394	2.739	2.347	2.296	2.727	3.266	2.761	2.43	2.371	2.469	2.854	2.418	2.685	2.232	2.449	2.962	2.542	2.25	2.592	2.681	2.578	2.731	2.319	2.616	2.485	2.242	2.727	2.428	2.724	2.526	2.117	2.374	2.49	2.245	2.336	2.071	2.267	2.878	2.752	2.97	1.923	2.509
227137_at	CACUL1	2.702	2.345	2.333	2.232	2.405	2.403	2.364	2.093	2.549	2.436	2.721	2.691	2.534	2.341	2.205	2.153	2.184	2.165	2.118	2.293	2.274	1.815	2.059	2.03	2.461	2.246	2.107	2.376	2.101	2.388	2.27	2.205	2.16	2.398	2.114	2.539	2.23	1.971	2.133	2.248	2.168	2.107	2.078	2.645	2.485	2.405	2.301	2.166
227257_s_at	CACUL1	7.432	6.863	6.515	7.126	5.574	5.35	6.225	6.851	5.871	6.688	6.412	7.345	7.105	7.093	5.802	6.758	6.578	6.133	7.173	5.351	6.638	4.825	5.86	6.755	6.559	6.71	6.557	7.161	6.096	6.054	5.578	5.701	6.825	6.295	5.721	6.468	6.085	5.659	5.95	4.839	6.828	4.488	5.419	6.552	6.471	5.366	4.423	6.129
1556259_at	CADM1	2.121	2.166	2.163	1.943	2.946	2.389	1.837	2.45	2.312	2.023	2.42	2.295	1.913	2	2.269	1.875	2.16	1.91	1.673	2.069	2.185	2.087	2.462	2.424	2.386	1.812	2.267	1.862	2.209	2.388	2.3	2.177	2.238	1.921	1.8	2.084	2.099	2.374	2.186	2.566	2.437	2.275	2.387	2.509	2.267	2.076	2.084	2.41
209031_at	CADM1	3.857	3.619	3.526	3.871	4.317	4.576	4.383	3.765	3.641	3.81	4.143	3.755	4.502	3.396	4.89	3.941	4.43	4.433	3.932	4.325	4.645	4.841	3.586	3.984	3.806	4.499	3.89	3.487	3.998	4.199	3.884	4.81	3.364	3.643	4.858	4.353	4.087	3.463	4.715	4.969	4.391	5.151	4.015	4.851	4.963	5.011	4.352	4.323
209032_s_at	CADM1	3.652	2.841	3.396	3.768	3.19	3.246	3.16	3.376	3.27	3.043	3.142	3.232	3.597	3.639	4.25	3.121	3.643	3.787	3.758	3.887	3.657	3.879	3.214	3.359	3.205	3.306	3.147	2.83	3.565	3.924	3.086	3.902	3.659	3.121	2.998	3.31	3.301	2.7	3.161	3.75	3.837	3.787	3.475	3.803	3.733	3.778	3.554	3.309
244345_at	CADM1	2.008	1.953	2.053	2.291	2.083	1.863	2.02	1.826	1.953	2.06	2.024	2.462	1.852	2.187	2.048	1.913	2.08	2.101	1.889	2.069	1.854	1.874	2.008	1.856	1.792	2.061	1.762	2.008	2.109	2.309	2.275	1.981	1.992	2.309	1.981	2.008	1.959	2.124	1.908	1.976	2.025	2.182	2.099	2.362	2.221	2.037	2.043	1.963
200935_at	CALR	3.009	2.887	3.133	2.694	3.144	2.681	2.799	2.698	2.84	2.828	3.059	2.667	2.551	2.585	3.039	3.363	3.111	2.88	2.837	2.562	2.69	2.69	3.092	3.152	2.822	2.747	2.574	3.306	3.536	3.214	3.295	2.661	2.998	2.688	3.366	3.176	3.442	3.221	4.092	3.06	2.723	3.284	3.23	3.095	3.025	2.919	3.116	2.868
214845_s_at	CALU	3.422	3.362	3.659	3.554	2.892	2.995	3.426	3.548	3.27	3.263	3.532	3.663	3.063	3.687	4.77	3.765	3.085	3.827	3.825	3.2	3.527	3.107	3.286	3.352	2.941	3.721	3.343	3.136	3.627	2.958	3.07	2.96	3.521	3.871	3.347	3.676	3.609	2.994	4.629	3.462	3.602	3.398	3.89	3.231	3.848	3.351	3.236	3.455
224994_at	CAMK2D	5.107	4.827	6.406	6.366	5.437	5.956	5.304	6.754	5.364	6.072	6.008	4.673	6.269	6.377	5.663	6.562	6.15	6.31	6.17	5.309	5.91	5.02	5.665	5.782	6.251	6.45	5.079	5.843	5.441	4.954	4.578	5.275	5.806	6.268	6.852	6.17	6.188	6.043	6.595	5.629	5.774	5.692	4.705	5.625	6.069	6.338	5.803	5.645
231793_s_at	CAMK2D	4.201	4.423	5.316	5.133	4.955	4.13	4.114	5.688	4.844	5.403	5.036	3.919	5.662	5.442	4.031	5.998	4.979	5.252	5.662	5.163	5.073	4.278	4.391	4.564	6.112	5.505	4.696	5.03	4.037	6.457	3.656	4.428	5.478	6.272	6.153	4.878	5.252	4.214	5.241	4.101	4.788	4.406	4.125	4.594	4.949	5.159	3.892	4.867
220409_at	CAMSAP1	3.036	2.641	2.939	3.772	2.314	2.395	2.716	4.077	2.448	2.495	2.35	2.939	2.737	2.778	2.17	2.644	2.645	2.762	2.688	2.629	2.622	2.207	2.657	2.301	3.065	2.16	2.116	2.586	2.527	2.869	2.604	2.138	2.74	2.429	2.458	2.169	2.454	2.253	2.355	2.114	3.1	1.975	2.117	2.429	2.554	2.479	2.211	2.755
220410_s_at	CAMSAP1	3.519	2.803	3.659	3.184	3.165	3.162	3.412	3.957	3.478	3.145	3.32	3.119	3.093	3.055	3.21	3.319	3.546	3.112	3.333	3.775	3.056	3.566	3.404	3.502	4.287	3.693	3.249	3.476	3.154	3.83	3.708	2.941	3.505	2.818	3.034	3.324	3.143	2.679	2.916	3.314	3.227	3.187	3.478	2.972	2.908	3.149	2.8	3.153
228995_at	CAMSAP1	3.04	2.268	2.22	2.193	2.521	2.261	2.286	2.013	2.36	2.406	2.488	2.582	2.213	2.247	2.485	2.297	2.029	2.248	2.162	2.681	1.977	2.151	2.422	2.704	2.212	2.38	2.716	2.528	2.331	2.853	2.782	2.565	2.34	2.677	1.874	2.449	2.246	2.25	2.262	2.555	2.701	2.256	2.617	2.87	2.484	2.584	2.322	2.203
244682_at	CAMSAP1	2.572	2.912	2.456	3.1	1.971	2.273	2.696	3.921	2.62	2.354	2.365	2.308	2.991	2.778	2.507	3.047	3.245	2.197	3.068	2.859	2.322	2.391	2.365	2.594	3.345	2.754	2.569	2.311	2.614	2.925	2.357	2.01	2.685	2.522	2.725	2.503	2.357	1.873	2.462	1.959	2.258	1.981	2.26	2.423	2.497	2.013	1.849	2.81
1555370_a_at	CAMTA1	3.853	4.059	4.683	4.838	3.525	3.16	4.13	4.962	3.365	3.483	4.404	2.457	3.728	3.961	5.052	3.554	3.751	3.881	4.297	3.705	3.166	4.398	4.292	3.907	3.982	4.134	3.573	3.627	3.17	4.146	3.067	3.354	3.831	3.942	3.311	3.387	3.943	4.049	3.814	3.913	3.297	3.787	3.536	3.232	4.207	3.734	3.477	3.178
213268_at	CAMTA1	2.151	2.535	2.844	2.964	2.776	3.074	2.562	2.413	2.463	2.409	3.362	1.621	2.498	2.392	3.816	2.584	2.428	2.663	3.13	2.388	3.106	2.995	3.277	2.448	3.094	2.422	2.493	2.864	1.983	2.676	2.15	2.569	2.769	3.206	2.891	2.202	2.706	2.972	2.977	3.046	2.554	2.812	2.58	2.231	2.661	2.65	3.015	2.417
1556318_s_at	CAND1	2.685	2.116	2.458	2.255	2.282	2.403	1.986	2.349	2.032	2.347	2.081	1.973	2.311	2.51	2.059	2.847	2.366	2.24	2.278	2.03	2.087	1.622	2.066	1.741	2.602	3.052	2.52	1.802	1.961	2.218	2.123	1.897	2.848	2.324	2.296	1.947	1.955	1.895	2.026	2.039	2.144	1.978	1.942	1.786	2.24	1.864	2.001	2.171
208838_at	CAND1	5.494	5.81	6.676	6.251	6.259	7.334	6.136	6.625	6.485	7.129	7.193	4.613	6.259	6.133	6.692	6.455	6.301	6.793	6.409	6.411	6.484	6.204	6.114	5.305	6.14	7.287	6.679	6.116	6.252	5.828	5.344	6.984	5.478	6.217	7.682	6.67	6.848	6.814	7.289	6.802	5.661	7.423	5.277	5.75	7.04	6.873	7.236	6.383
208839_s_at	CAND1	5.218	5.436	6.199	6.043	5.608	6.941	5.643	6.332	5.862	6.724	7.011	4.478	5.89	5.637	6.456	6.082	5.924	6.678	6.244	5.692	5.966	5.802	5.84	4.844	5.83	7.003	6.409	5.865	5.727	5.506	5.341	6.208	5.342	6.069	7.074	6.469	6.645	6.598	6.796	6.7	5.462	6.959	5.363	5.578	6.536	6.661	6.659	6.031
204275_at	CAPN15	3.679	4.118	4.049	4.168	4.694	3.53	4.141	3.872	4.279	3.789	3.226	3.757	4.065	3.782	4.063	4.206	3.598	4.287	4.077	3.713	3.576	3.834	3.731	3.903	4.139	3.803	4.567	3.759	4.509	3.291	4.766	3.868	3.792	3.936	4.351	4.751	5.283	3.919	5.346	4.157	4.007	4.124	4.265	3.344	4.527	3.615	4.065	3.801
226289_at	CAPRIN1	2.225	2.727	2.853	2.597	2.106	2.177	2.26	2.497	2.526	2.453	2.397	2.431	2.433	2.185	2.522	2.556	2.345	2.972	2.514	2.63	2.297	2.344	2.313	2.13	2.056	2.246	2.569	2.26	2.313	2.582	2.246	2.79	2.687	2.497	2.991	2.563	2.563	2.753	2.829	2.497	2.336	2.688	2.497	2.551	2.694	2.348	2.558	2.374
236850_at	CAPRIN1	2.502	3.195	2.617	3.587	2.444	2.416	2.658	2.844	3.082	2.797	2.683	2.593	3.294	3.143	2.522	3.329	2.66	2.798	2.78	2.913	2.65	2.743	2.564	3.185	3.922	2.738	2.768	2.102	2.299	3.916	2.5	2.521	2.983	2.646	3.278	2.58	2.493	2.578	2.894	2.33	3.077	2.619	2.026	2.789	2.39	2.764	2.205	2.796
1569450_at	CAPZA2	4.266	3.658	3.711	3.891	3.711	3.708	4.116	3.686	3.298	3.503	3.417	3.376	4.076	4.033	3.649	3.453	4.044	3.309	4.055	3.441	3.427	3.255	3.433	3.257	3.774	4.454	3.39	3.688	4.196	3.774	3.94	4.212	3.864	3.657	3.347	3.307	3.277	3.321	3.12	2.959	3.372	3.24	3.169	3.292	3.536	3.178	3.283	3.816
228324_at	CARNMT1	3.487	4.232	4.988	4.7	5.068	5.974	4.491	4.468	4.432	5.436	5.406	3.801	4.71	4.37	5.328	5.233	4.786	4.891	4.802	4.941	4.686	4.45	4.712	3.794	4.636	5.843	4.942	4.393	4.455	3.973	3.96	4.968	4.03	5.082	6.753	4.9	5.386	5.42	5.799	5.214	3.62	6.024	3.546	4.222	5.632	5.147	5.611	5.121
241781_at	CARNMT1	1.724	1.836	1.757	1.896	1.828	2.113	2.075	1.669	1.91	1.944	1.648	1.763	1.8	1.706	1.526	2.032	2.36	2.083	1.779	1.646	1.942	1.599	1.923	1.842	1.611	1.921	1.899	1.568	1.63	1.834	1.667	1.771	2.385	1.71	1.881	1.8	1.894	1.863	2	1.878	1.846	1.715	1.862	1.878	1.744	1.983	1.947	2.26
230420_at	CASZ1	2.177	2.085	2.116	1.921	2.503	2.155	1.919	1.939	1.944	2.006	2.154	2.684	1.738	2.162	2.332	1.948	2.297	1.917	1.857	1.805	2.103	1.917	1.758	1.9	2.043	1.761	2.156	2.115	2.013	2.198	1.993	1.857	1.915	2.229	2.231	1.934	1.986	1.931	1.941	1.917	2.718	1.951	2.243	2.263	1.928	2.217	1.887	1.914
243386_at	CASZ1	3.494	2.837	3.103	3.999	3.618	3.728	3.842	3.423	2.401	3.759	3.324	3.331	3.563	3.408	3.416	3.105	3.79	3.604	3.076	3.073	3.283	3.591	2.801	2.723	2.777	3.546	3.26	3.303	3.307	2.539	2.944	3.636	3.101	3.2	5.022	3.868	4.111	4.621	3.645	3.322	3.475	4.315	2.765	2.862	4.183	3.582	3.552	3.496
208348_s_at	CBLB	1.857	1.934	1.665	2.427	1.921	1.806	2.138	1.735	1.904	2.06	2.024	2.167	1.988	1.921	1.762	2.245	1.898	2.699	1.871	1.957	1.976	1.932	1.771	1.837	1.499	2.047	1.871	1.949	1.87	1.989	2.19	1.988	1.762	1.756	2.116	1.943	1.981	1.838	1.995	1.885	2.08	1.764	1.783	2.044	1.733	2.16	1.771	1.89
227900_at	CBLB	5.046	5.699	6.353	6.409	6.114	6.734	6.068	6.18	6.125	7.096	6.101	4.634	5.723	5.539	6.235	6.684	5.798	6.794	6.385	5.968	5.553	6.142	6.064	5.331	5.708	6.609	6.443	5.553	5.803	5.515	4.986	6.069	5.622	6.453	7.49	6.102	6.862	5.765	7.09	6.573	5.851	7.256	5.612	5.52	6.984	6.796	6.749	6.298
207083_s_at	CC2D1A	2.811	3.038	2.712	3.321	3.461	2.846	3.112	2.903	2.966	3.298	3.459	3.65	3.029	2.879	2.7	2.942	2.565	2.729	2.951	2.701	2.734	3.172	2.815	3.024	3.053	2.455	2.791	3.122	2.613	3.566	3.365	2.773	3.097	2.785	2.901	3.457	3.335	3.242	2.687	3.125	3.121	3.038	3.304	2.98	3.151	3.144	2.695	3.326
222137_at	CC2D1A	2.352	2.72	2.458	2.854	2.589	2.925	2.271	2.385	2.548	2.488	2.431	3.431	2.617	2.409	2.792	2.556	2.768	2.45	2.737	2.763	2.723	2.505	2.519	2.847	2.432	1.772	2.432	2.681	2.857	3.085	3.176	2.03	2.556	2.889	2.399	2.164	3.227	2.555	2.799	2.855	3.178	2.826	3.095	2.98	2.512	2.725	2.639	2.276
58994_at	CC2D1A	4.407	4.938	3.755	4.781	4.369	3.956	4.865	4.369	4.66	4.564	3.654	4.664	4.609	4.571	4.52	4.575	4.512	4.579	4.345	4.424	5.089	4.199	4.934	5.005	4.467	3.582	4.645	5.152	4.966	4.299	5.532	3.663	4.939	4.594	4.053	4.256	5.109	4.223	5.011	4.71	4.893	4.362	4.4	4.569	4.631	3.733	4.151	4.621
1553542_at	CCDC125	5.282	4.704	4.356	4.641	3.584	4.081	4.043	4.442	3.953	4.16	4.384	5.511	4.662	4.825	3.7	4.591	3.789	4.538	5.502	3.997	4.651	3.181	3.36	4.773	5.09	4.339	4.399	4.637	4.044	4.384	3.952	3.657	4.725	4.305	3.61	4.041	4.317	3.69	3.854	3.642	4.689	2.974	3.771	4.784	3.776	4.058	3.399	4
229082_at	CCDC125	5.048	4.719	4.44	4.673	4.584	5.151	5.165	4.88	4.456	4.948	5.074	5.015	5.119	3.939	4.701	4.696	5.621	5.087	5.696	4.688	4.858	4.672	5.135	4.687	5.483	4.937	5.193	5.433	5.693	4.547	5.249	5.087	4.115	5.286	4.332	4.132	4.157	4.742	3.765	4.539	4.445	4.461	5.263	4.96	4.64	4.126	4.372	4.121
1561054_a_at	CCDC14	2.004	1.902	2.086	2.014	2.197	1.859	2.062	1.947	1.923	1.815	1.732	1.792	1.926	1.857	2.284	1.988	1.976	1.769	1.946	1.672	1.884	2.159	2.104	2.309	2.012	2.161	1.74	2.337	2.475	2.014	1.98	1.917	2.175	2.016	2.155	1.865	1.843	1.993	1.839	1.925	2.021	1.864	1.693	1.827	2.078	1.943	1.726	2.14
225017_at	CCDC14	5.002	6.162	5.61	6.304	6.16	7.776	6.02	6.481	6.617	7.188	5.818	4.578	6.128	5.533	6.666	6.642	6.258	6.849	6.402	6.486	6.486	6.51	6.377	5.319	6.152	5.884	6.388	5.94	5.775	5.446	5.326	6.516	5.726	6.55	7.786	6.329	7.151	6.816	7.22	6.571	5.628	7.316	4.926	6.096	6.092	7.329	7.612	6.207
240884_at	CCDC14	1.729	2.089	1.874	1.711	2.019	2.239	2.112	1.599	2.084	1.689	1.701	1.935	1.651	1.909	1.854	1.825	2.289	1.676	1.634	1.714	1.713	1.911	1.874	1.928	1.604	1.823	1.728	2.041	1.916	1.953	1.953	1.867	1.751	2.019	1.97	1.701	1.566	2.132	1.653	2.064	1.987	1.728	1.768	1.936	1.862	1.871	1.88	2.104
240293_at	CCDC153	4.321	3.981	3.244	3.579	3.637	3.412	3.837	3.396	3.854	3.429	3.017	4.237	3.556	2.908	3.623	2.857	4.662	3.104	3.7	4.135	3.621	3.997	3.804	3.33	3.838	3.185	3.487	3.675	4.103	3.904	4.053	3.684	3.487	3.363	2.609	3.414	3.286	3.152	3.154	3.645	3.62	2.917	3.499	4.158	3.297	3.089	3.046	3.662
1559003_a_at	CCDC163	4.3	3.784	4.868	3.455	3.818	3.53	3.616	3.695	3.633	3.258	3.868	3.709	3.642	4.36	3.814	4.799	3.589	3.661	3.122	5.065	3.524	3.947	3.977	4.454	3.447	4.847	3.459	3.355	4.302	4.504	4.727	4.424	4.589	4.241	4.231	3.764	4.694	5.147	4.594	4.13	4.146	5.089	3.957	3.641	3.702	4.725	4.592	3.969
231300_at	CCDC189	3.399	4.611	3.634	3.679	3.805	4.178	4.819	3.91	3.881	4.123	3.473	4.351	4.027	4.061	4.555	4.486	3.831	3.584	4.246	3.752	4.482	3.956	4.896	3.929	4.926	3.732	3.897	4.272	4.159	3.977	4.532	3.877	3.636	3.778	3.538	3.139	3.4	3.785	3.865	3.936	3.989	3.617	4.054	4.125	3.434	3.436	4.095	4.441
222525_s_at	CCDC25	3.923	4.21	4.055	4.035	4.746	5.944	4.445	4.303	4.444	4.916	5.408	3.784	4.868	4.357	5.033	4.878	4.975	4.997	4.601	4.785	5.194	4.503	4.456	4.236	5.038	5.23	4.792	4.825	4.375	4.528	3.739	4.481	4.486	4.277	5.598	4.937	4.923	4.918	5.407	5.407	4.478	5.682	4.284	4.638	4.625	5.875	5.393	4.686
1553666_at	CCDC34	1.922	1.757	1.9	1.954	1.856	1.879	2.311	2.027	1.791	1.988	2.022	2.431	1.804	1.787	1.871	1.961	2.421	2.072	1.867	2.23	1.854	2.197	1.762	2.132	1.831	1.675	2.256	2.073	1.95	2.248	1.95	1.989	2.037	1.958	1.861	1.99	2.001	1.981	2.265	2.084	2.347	1.865	1.966	2.291	2.113	2.203	2.17	1.9
226287_at	CCDC34	2.082	2.572	2.637	2.754	2.602	3.298	2.247	2.54	2.62	3.274	2.729	1.987	2.534	2.57	2.609	2.962	2.529	2.467	2.55	2.761	2.592	2.856	2.279	2.521	2.775	2.892	2.547	2.253	2.526	2.47	2.411	2.655	2.625	2.761	3.653	2.715	3.451	2.841	3.304	3.535	2.897	3.713	2.51	2.596	2.403	3.733	3.101	2.273
234661_at	CCDC57	3.686	3.069	3.307	2.523	2.964	2.995	2.537	2.99	3.009	3.268	3.211	3.253	2.993	2.441	2.888	3.078	2.525	3.285	2.806	2.761	3.171	3.185	3.05	3.287	2.737	2.985	3.215	3.082	3.545	3.664	3.529	2.758	3.288	2.79	2.951	3.221	3.577	3.567	2.883	3.426	3.659	3.114	3.73	3.417	3.344	3.532	3.546	3.3
1570571_at	CCDC91	4.731	3.725	5.193	4.798	4.563	5.018	4.894	5.657	4.105	4.454	4.39	4.032	4.953	5.641	4.392	5.346	4.506	4.1	4.762	4.439	4.36	3.266	4.99	4.459	5.814	5.689	4.19	3.821	4.909	5.232	5.342	4.354	5.508	4.777	4.743	4.448	4.424	2.894	4.34	4.667	4.444	5.313	4.549	4.836	3.219	3.971	4.201	3.363
218545_at	CCDC91	4.416	5.59	5.732	5.709	5.59	7.076	5.129	5.923	5.64	6.615	6.344	4.759	5.819	5.269	6.057	6.136	5.773	6.332	6.117	5.811	6.111	5.914	5.871	4.93	6.21	6.585	5.909	6.163	5.473	5.645	5.076	6.175	5.262	5.657	7.266	6.272	6.503	6.36	7.007	6.211	5.383	7.061	4.798	5.885	6.1	6.805	6.868	5.672
205827_at	CCK	3.26	2.709	2.925	2.932	2.929	2.552	2.932	2.336	2.932	2.624	2.914	3.147	2.712	2.502	2.894	2.687	2.528	2.595	2.392	2.471	2.279	2.674	2.7	2.985	2.886	2.662	2.808	3.098	2.751	4.07	3.268	3.268	2.882	2.713	2.786	3.502	3.254	2.848	2.711	2.801	3.449	3.074	3.444	3.365	3.022	2.958	2.812	3.207
204501_at	CCN3	5.933	4.669	5.282	3.732	3.811	3.542	4.894	4.56	4.508	4.193	4.794	5.154	4.726	3.981	4.724	3.991	5.67	4.185	4.852	4.62	4.242	4.498	3.935	4.31	3.726	5.331	4.939	4.794	5.821	3.416	4.142	5.795	4.683	5.084	3.926	4.383	3.658	4.194	3.305	3.97	4.34	4.404	4.186	3.959	5.174	3.929	4.553	4.053
214321_at	CCN3	7.273	6.079	7.02	5.151	5.653	4.172	6.274	5.815	5.953	5.579	5.761	6.286	6.244	4.552	5.554	4.901	6.672	5.411	6.059	6.172	5.607	4.965	5.835	5.554	4.636	6.3	6.332	6.862	7.079	5.042	5.569	7.675	5.386	6.15	4.99	5.737	4.771	5.968	3.753	4.889	5.533	5.281	5.092	5.492	6.35	4.619	5.798	5.007
202770_s_at	CCNG2	7.234	6.601	7.905	7.247	6.426	7.311	6.606	7.116	6.741	7.625	7.427	5.872	7.038	6.661	7.057	6.968	7.232	7.319	7.655	6.439	6.586	6.681	6.925	6.201	5.433	7.657	7.21	7.235	7.581	5.806	5.761	7.376	6.371	7.269	7.647	7.192	7.323	7.207	7.693	6.703	6.433	7.092	5.671	5.796	7.748	7.062	7.005	6.996
211559_s_at	CCNG2	6.04	4.992	6.834	5.709	4.154	5.03	4.736	6.004	5.28	6.272	6.552	5.168	5.422	5.42	5.557	5.533	5.877	6.369	6.391	4.792	5.062	4.408	5.421	4.945	4.159	6.418	6.107	5.724	5.772	4.612	3.797	5.75	5.083	6.08	6.262	5.934	6.065	5.507	6.489	4.443	5.758	5.301	4.413	4.577	6.292	6.07	4.849	5.602
228810_at	CCNYL1	3.869	4.037	4.073	4.612	3.815	3.716	3.485	4.805	4.06	4.357	4.017	3.935	4.034	4.424	3.972	4.692	4.102	4.246	4.657	3.636	4.065	3.839	3.72	3.559	4.441	4.249	4.203	4.021	3.922	2.905	3.589	3.877	3.656	3.879	4.217	3.926	4.308	3.5	4.147	3.812	4.041	3.757	3.349	3.882	4.206	4.643	3.731	3.521
207794_at	CCR2	3.974	3.68	4.563	4.143	2.804	3.919	3.004	4.388	3.206	3.596	5.194	3.645	3.883	3.822	4.254	3.561	3.845	4.596	4.61	2.873	3.427	3.351	3.222	3.02	3.239	4.382	4.459	3.728	3.56	2.802	3.584	3.574	2.989	3.524	4.433	4.128	3.611	4.406	5.266	3.566	4.289	3.512	4.08	3.97	3.522	4.199	3.917	3.845
208304_at	CCR3	6.934	7.443	7.566	7.536	6.995	7.25	8.029	7.297	7.438	7.408	8.176	7.151	6.332	7.795	7.2	6.448	7.711	7.387	7.648	7.664	7.429	7.017	7.789	6.659	6.743	7.471	8.236	7.372	8.073	6.842	7.353	7.1	7.329	8.836	6.584	7.8	6.59	5.93	4.386	7.268	7.152	6.134	7.851	6.651	7.738	6.697	7.61	6.213
211434_s_at	CCRL2	4.346	4.325	4.327	4.284	4.252	4.541	3.965	4.586	4.251	4.056	4.029	4.701	4.567	3.886	4.565	4.288	4.978	4.792	4.993	4.532	4.298	4.632	4.585	4.162	4.473	3.907	5.2	4.017	4.543	3.96	5.1	5.122	3.595	4.467	5.108	4.75	4.564	5.593	5.011	5.071	4.536	4.643	4.56	5.001	4.301	5.079	5.191	5.329
1553698_a_at	CCSAP	2.113	1.739	2.402	1.672	1.843	1.94	2.156	1.969	1.921	1.958	1.998	1.886	1.955	1.917	1.934	1.911	1.986	1.906	1.71	1.835	1.756	1.688	1.803	1.986	2.257	1.89	1.96	1.965	1.483	1.848	1.617	1.871	1.86	2.058	1.852	1.81	1.878	1.84	1.94	2.036	2.27	1.837	1.801	1.774	1.785	1.653	1.885	1.918
1555145_at	CCSAP	3.02	2.536	2.448	2.543	2.618	1.989	2.415	2.311	2.24	2.095	2.396	2.293	2.341	2.486	2.594	2.33	2.261	2.139	2.535	2.488	2.409	3.183	2.25	2.505	2.176	2.309	2.501	2.759	2.426	2.78	2.716	2.506	2.316	2.342	2.473	2.715	2.26	2.538	2.117	2.651	2.639	2.408	2.449	2.183	2.298	2.432	2.623	2.771
1554131_at	CCSER2	1.678	1.795	1.651	1.555	1.773	1.792	1.589	1.731	1.59	1.532	1.774	1.808	1.694	1.519	1.794	1.835	2.03	1.686	1.993	1.417	1.828	1.601	1.774	1.611	1.724	1.797	1.861	1.837	1.735	1.852	1.644	1.902	1.754	1.814	2.008	1.677	1.81	1.783	1.608	1.716	1.652	1.817	1.449	1.906	1.674	1.624	2.083	1.782
1554132_a_at	CCSER2	5.4	5.289	5.109	6.55	5.276	4.97	5.391	6.676	5.835	5.983	4.68	5.337	5.866	6.504	4.56	6.747	5.396	6.479	6.432	4.983	6.285	4.464	5.004	5.442	6.537	5.122	5.734	6.123	4.842	4.773	4.345	4.625	6.189	6.26	7.166	5.697	6.624	4.591	6.643	4.204	6.48	4.484	4.349	5.545	5.329	5.824	4.513	6.066
215024_at	CCZ1B	6.632	6.022	7.002	6.673	5.659	5.863	6.174	6.899	5.304	5.785	6.252	6.62	6.394	7.053	5.738	7.248	5.788	6.283	7.012	5.9	6.337	4.568	5.812	6.508	6.936	7.297	5.971	6.215	6.056	6.458	5.677	6.004	7.129	6.155	4.896	5.432	5.86	4.695	6.121	5.077	6.253	5.484	5.372	5.671	6.282	5.67	5.012	5.427
207840_at	CD160	4.421	4.54	7.422	6.343	6.811	7.016	5.705	6.337	6.102	7.731	6.262	6.035	6.078	6.076	5.861	7.517	5.836	7.612	5.618	6.597	6.429	6.576	5.542	4.819	6.242	6.165	6.824	6.023	4.878	5.377	5.374	6.829	6.25	6.165	9.074	6.797	7.135	5.708	8.686	8.078	6.862	7.098	5.8	5.382	7.156	8.045	7.971	7.23
204581_at	CD22	5.124	5.867	5.787	6.125	6.578	6.142	6.447	6.276	6.648	6.233	4.807	5.607	6.358	6.373	6.221	6.297	6.388	6.091	6.075	7.469	4.614	6.191	6.781	5.639	6.676	5.651	5.35	6.66	5.856	6.026	5.506	6.154	6.555	6.332	5.339	5.343	6.028	5.115	6.341	6.266	5.227	5.834	6.037	5.502	5.785	6.051	6.079	6.335
217422_s_at	CD22	2.69	3.304	2.989	2.815	3.3	3.065	3.264	3.537	3.279	3.148	3.167	2.733	3.103	3.252	2.754	3.661	2.982	3.366	3.021	2.823	2.813	3.056	3.163	3.05	2.816	3.305	3.165	3.466	2.935	3.135	3.057	2.522	2.893	2.989	2.28	2.789	3.499	2.987	3.807	2.806	2.94	2.698	3.194	3.1	2.831	3.105	2.747	3.24
220674_at	CD22	2.346	2.557	3.306	3.596	3.044	3.083	3.402	3.248	3.275	3.287	3.132	2.544	3.634	2.828	3.13	3.583	2.732	2.699	3.757	4.311	2.676	2.996	3.227	3.085	3.982	4.076	2.59	2.956	2.724	2.996	2.36	2.764	3.865	3.468	2.455	2.734	2.79	2.63	3.002	2.559	2.566	2.629	2.784	2.469	2.91	3.264	2.387	3.399
208650_s_at	CD24	3.876	4.896	5.035	4.597	5.953	6.944	6.461	5.147	5.508	5.836	5.555	4.43	5.282	4.95	5.385	6.007	5.671	4.935	5.967	6.381	4.955	5.834	6.28	4.802	6.365	5.95	5.286	6.218	5.074	5.018	3.252	5.575	5.289	5.419	5.112	5.103	5.123	5.353	4.175	5.289	3.153	4.628	5.681	5.155	5.13	5.344	4.691	6.137
208651_x_at	CD24	4.279	5.634	5.574	5.103	5.726	6.852	5.941	5.756	5.838	6.252	6.212	4.932	5.784	5.764	5.738	6.16	5.793	5.833	6.069	6.472	5.056	5.914	6.436	5.378	5.997	5.995	5.744	6.079	5.347	5.171	4.179	5.715	5.627	5.871	5.484	5.526	5.657	5.882	4.935	5.79	4.172	5.494	5.953	5.983	5.574	5.926	5.552	6.554
209771_x_at	CD24	6.49	7.539	7.734	6.662	7.933	9.221	8.338	7.977	7.851	8.355	8.191	6.653	7.805	7.798	7.925	8.442	7.872	7.803	8.205	8.633	7.123	8.149	8.486	7.543	8.318	8.356	7.983	8.594	7.388	7.345	6.023	8.015	7.448	7.901	7.336	7.8	7.853	8.17	6.96	7.789	5.765	7.577	8.009	7.841	7.719	8.252	7.415	8.482
209772_s_at	CD24	3.541	3.528	3.785	3.474	3.861	5.153	4.47	3.894	3.707	3.806	3.995	3.708	3.538	3.835	3.887	3.657	3.503	3.761	4.122	4.37	3.568	3.605	4.289	3.636	4.51	4.264	3.249	4.445	3.355	3.719	3.508	3.885	3.936	3.825	3.058	3.589	3.796	4.04	3.373	3.975	3.259	3.613	4.316	3.338	3.564	3.962	3.542	4.046
216379_x_at	CD24	5.997	7.474	7.528	6.727	8.062	9.14	8.159	7.84	7.647	8.037	8.086	6.435	7.601	7.624	7.598	8.139	7.722	7.787	8.05	8.569	7.116	8.026	8.413	7.337	8.109	8.058	7.877	8.575	7.052	7.142	6.01	7.779	7.378	7.833	7.357	7.569	7.667	7.996	6.765	7.796	5.47	7.362	7.879	7.672	7.517	8.044	7.318	8.392
266_s_at	CD24	4.833	6.028	6.166	5.331	6.575	7.934	6.923	6.318	6.278	6.854	6.247	5.124	6.289	6.143	6.443	7.014	6.266	6.102	6.709	7.028	5.64	6.36	7.118	5.2	6.747	6.946	6.326	6.834	5.694	5.757	4.37	6.947	5.964	6.327	5.883	5.66	6.124	6.474	5.336	5.975	4.028	6.176	6.386	6.265	6.121	6.441	5.713	7.13
206545_at	CD28	6.143	6.548	6.546	6.581	6.529	7.49	6.128	6.887	6.687	6.848	7.112	4.34	6.492	6.299	7.063	6.648	5.643	6.629	6.599	6.146	6.099	6.297	6.611	5.534	6.56	7.402	6.558	6.154	5.982	6.119	5.627	6.16	6.171	6.638	6.691	6.869	6.635	6.626	6.814	6.95	5.695	7.547	5.501	5.09	6.386	6.756	7.249	6.052
211861_x_at	CD28	3.008	3.162	3.244	2.945	2.844	3.535	2.653	2.611	3.055	3.209	3.154	2.778	2.708	2.95	3.042	3.042	3.155	2.925	2.435	2.746	2.68	3.073	2.906	2.818	3.143	3.572	2.961	3.464	2.604	3.318	3.005	2.864	3.483	2.749	3.075	3.294	3.338	3.308	3.225	3.461	2.884	3.495	3.486	2.755	3.054	3.759	3.028	2.874
242197_x_at	CD36	6.386	7.164	6.171	6.738	5.471	5.545	6.046	7.375	5.839	5.52	5.848	6.137	6.932	7.106	4.901	6.542	5.436	7.796	6.962	6.488	6.765	4.93	6.187	6.993	8.352	6.178	6.221	6.137	4.89	6.585	5.796	5.167	6.345	7.078	6.443	5.343	5.115	5.312	5.623	4.535	7.761	3.591	4.281	7.538	5.202	5.442	4.695	6.833
205692_s_at	CD38	5.837	5.324	6.071	5.486	5.196	5.019	6.674	6.002	5.902	5.91	5.649	5.471	5.043	5.539	9.276	6.562	5.614	5.887	5.893	5.263	4.829	5.339	5.612	6.203	4.589	5.461	5.791	4.687	6.045	5.051	4.612	5.951	5.262	6.674	6.868	6.12	7.052	6.232	8.187	7.118	6.585	5.479	6.944	6.067	6.47	6.702	6.35	5.637
222292_at	CD40	5.025	4.905	5.569	5.725	4.74	4.779	4.638	6.067	4.519	5.115	4.531	4.612	5.96	6.067	4.25	5.544	4.184	4.976	5.602	4.908	4.351	4.583	4.875	5.205	5.523	6.146	4.625	5.174	4.746	5.573	4.839	4.577	6.547	5.452	4.683	3.957	4.497	4.432	4.897	4.104	4.444	3.521	3.772	5.089	4.364	4.819	3.694	5.174
213856_at	CD47	3.521	3.847	4.261	4.27	3.642	4.586	3.575	4.174	3.917	4.469	4.254	2.552	3.62	3.497	4.236	3.861	3.605	4.319	3.74	3.755	3.775	3.634	4.018	3.305	3.168	4.486	3.995	3.654	3.78	3.474	3.362	3.636	3.685	3.902	4.72	3.899	4.642	4.127	4.412	4.158	3.454	5.33	3.256	3.651	4.673	4.145	4.294	3.512
227259_at	CD47	5.796	6.756	5.938	6.736	7.746	6.008	6.918	8.494	5.556	5.841	7.126	6.464	6.393	6.676	5.193	6.782	5.349	7.272	6.007	5.662	6.639	6.849	6.64	5.993	6.731	6.661	6.618	5.698	5.482	8.248	5.593	5.524	7.22	7.508	7.899	6.106	6.022	5.642	6.883	5.882	6.236	5.791	5.954	7.152	6.384	6.013	6.145	5.898
209795_at	CD69	2.754	3.843	3.914	4.459	4.767	6.419	3.685	4.251	3.843	5.959	5.781	2.431	4.606	3.035	5.129	4.943	4.096	5.058	4.425	4.26	5.034	4.7	4.149	3.423	4.454	5.588	4.557	4.514	3.633	4.083	3.033	4.945	3.019	4.466	6.265	4.666	5.967	5.042	6.233	5.335	3.545	6.131	2.938	4.3	4.621	5.626	5.6	4.665
1567628_at	CD74	3.977	3.919	3.684	3.2	3.867	3.461	3.712	3.604	3.655	3.52	3.607	3.251	3.376	3.997	3.424	3.669	3.804	3.799	3.722	3.349	3.807	3.433	3.742	4.332	3.453	3.417	3.944	4.118	4.369	3.896	4.221	3.703	3.94	3.796	3.66	4	4.817	3.978	4.227	4.267	4.025	3.589	4.039	3.283	3.838	3.448	3.528	3.384
205049_s_at	CD79A	5.876	6.273	6.848	6.286	6.978	6.934	7.148	6.878	6.749	6.676	6.664	6.105	6.86	6.779	7.016	7.072	6.797	6.864	6.864	6.64	5.625	6.747	7.121	6.58	6.765	6.895	6.019	7.259	6.716	7.26	6.224	6.077	6.604	6.799	5.626	6.508	7.679	5.901	7.762	7.46	5.898	6.823	6.893	5.915	6.932	6.794	6.804	6.386
211188_at	CD84	2.57	3.175	2.732	1.974	2.778	2.396	2.323	2.367	2.4	2.534	2.58	3.111	2.666	2.549	2.711	2.197	2.549	2.703	2.801	2.865	2.848	2.753	2.203	2.857	2.268	2.399	2.262	2.23	2.668	2.511	3.055	2.485	2.969	3.003	2.494	2.593	2.813	2.83	2.788	3.026	2.91	2.35	2.877	2.816	2.391	2.525	2.477	2.271
211191_at	CD84	2.506	2.88	2.482	2.483	2.831	2.387	2.634	2.548	2.589	2.199	2.558	2.808	2.326	2.384	2.186	2.247	2.429	2.474	2.839	2.696	2.714	3.307	2.816	2.698	2.556	2.341	2.715	2.955	2.604	2.73	2.723	2.588	2.523	2.286	2.588	2.56	2.83	2.659	2.428	2.736	2.788	2.679	2.906	2.769	2.44	2.961	2.962	2.182
211192_s_at	CD84	4.666	4.347	4.381	5.189	3.934	3.438	4.215	5.117	3.455	4.444	4.178	4.672	4.91	6.395	3.155	5.824	3.589	4.67	5.194	2.936	4.724	2.596	3.036	5.532	5.266	4.596	3.412	4.817	3.222	4.394	2.999	3.298	5.259	4.784	5.284	4.982	4.625	3.97	4.201	2.778	5.86	2.367	2.444	4.577	4.454	4.438	2.981	4.887
233317_at	CD9	2.685	2.509	2.313	2.19	2.538	2.211	3.026	2.14	2.467	2.299	2.538	2.168	3.173	2.493	2.829	2.253	2.707	2.344	2.392	3.134	2.565	2.112	2.387	2.594	2.752	2.768	2.317	2.935	3.139	2.906	2.633	2.881	2.784	2.95	2.1	2.335	2.294	2.508	2.407	2.438	2.192	2.556	2.522	2.571	2.527	2.647	2.493	2.318
205288_at	CDC14A	2.747	2.818	3.297	3.433	3.008	4.466	2.842	3.286	3.064	3.848	3.435	2.015	2.854	2.726	2.944	3.198	2.871	3.299	3.777	2.066	3.088	3.178	2.994	2.35	2.919	3.945	3.059	2.99	2.783	2.319	2.242	3.162	3.011	3.412	4.411	3.468	3.514	3.385	3.002	3.246	2.004	4.688	1.776	2.082	3.274	3.189	3.862	3.109
210441_at	CDC14A	3.138	2.248	2.87	2.651	2.633	2.366	2.19	2.446	2.97	2.215	2.771	2.618	2.339	2.94	2.483	2.825	2.801	2.849	2.461	2.6	2.301	2.333	2.316	2.862	2.306	3.017	2.697	2.262	2.429	2.488	2.429	2.337	2.972	2.36	2.546	2.948	3.185	2.374	2.529	2.629	2.827	2.738	3.041	2.841	2.769	2.805	2.779	2.368
210743_s_at	CDC14A	4.402	5.192	5.184	5.826	4.528	4.265	5.066	5.532	5.497	4.904	4.916	3.947	5.346	5.562	4.892	5.294	5.276	5.022	5.363	5.066	4.222	4.071	5.05	4.654	4.85	5.685	5.019	4.571	4.458	3.6	3.441	3.789	5.335	5.588	4.604	3.561	4.457	2.955	4.069	3.862	4.787	3.98	3.542	4.465	4.405	4.263	3.514	4.674
223674_s_at	CDC42SE1	6.967	6.481	7.334	7.016	6.258	6.469	6.945	7.278	7.128	7.385	6.999	7.331	7.351	7.333	7.446	6.921	6.943	7.056	7.325	6.021	6.876	6.143	6.769	6.515	6.931	6.504	7.195	6.83	7.385	5.427	4.628	6.688	6.484	7.324	6.563	6.672	7.105	4.492	6.49	5.385	7.403	5.71	5.609	6.3	6.601	7.104	4.71	6.829
221436_s_at	CDCA3	2.812	2.912	2.986	2.857	2.992	2.711	2.699	2.395	3.167	2.735	2.556	2.959	2.377	2.934	3.291	3.059	2.699	2.815	2.975	2.964	2.436	2.979	2.71	3.336	2.574	2.281	3.026	2.796	3.241	3.078	2.714	3.085	2.982	2.795	2.928	3.195	3.044	3.009	2.923	2.832	3.089	2.757	3.368	2.749	2.884	3.475	2.787	3.121
223307_at	CDCA3	4.201	3.628	3.798	3.943	3.758	3.49	4.476	3.503	3.613	3.703	3.948	4.545	3.312	3.507	4.956	3.918	3.722	4.007	3.582	3.872	3.905	3.647	4.037	4.399	3.733	4.06	3.729	4.091	3.627	4.046	4.154	3.761	3.99	4.078	4.373	4.354	4.119	4.462	4.529	4.593	4.694	4.362	4.9	4.497	4.08	4.972	4.02	3.548
1556654_at	CDK12	3.467	3.86	3.564	3.566	3.601	3.499	3.665	4.104	3.514	3.67	2.657	3.214	3.783	3.301	3.247	3.44	3.273	3.542	3.67	2.735	3.637	3.652	3.353	3.511	4.29	3.497	2.813	3.493	3.401	3.803	3.517	3.499	3.973	3.376	3.528	3.073	2.829	3.283	3.775	3.284	3.849	3.403	3.34	3.146	3.563	3.287	3.442	3.091
207239_s_at	CDK16	3.181	2.943	2.816	2.929	3.403	2.641	3.049	2.928	2.988	3.129	3.186	3.714	3.184	2.839	3.184	3.143	2.905	3.483	2.928	2.727	2.898	3.088	2.768	3.525	2.897	2.692	3.232	3.612	3.291	3.276	3.982	2.884	2.982	3.008	2.991	3.508	3.856	3.607	3.436	3.605	3.538	3.077	3.256	3.412	3.025	3.129	2.925	3.422
207039_at	CDKN2A	2.2	2.219	2.692	2.445	2.483	2.315	2.705	2.281	2.462	2.625	2.558	2.42	2.251	2.147	2.874	2.189	2.269	2.297	2.236	2.806	2.14	3.088	2.243	2.21	2.349	2.282	2.484	2.234	2.207	2.848	2.015	2.639	2.808	2.296	3.584	2.451	2.733	2.467	2.727	2.659	3.081	2.531	2.575	2.267	2.55	2.638	2.945	2.727
1555758_a_at	CDKN3	2.391	2.418	2.482	2.604	2.538	2.81	2.759	2.112	2.77	2.653	2.713	2.753	2.522	2.232	2.906	3.341	2.732	2.547	2.442	2.67	2.507	2.363	2.442	2.813	2.708	2.632	2.574	2.351	2.608	2.694	2.464	2.44	2.553	2.341	3.625	2.535	2.963	2.733	3.474	3.579	2.344	2.946	2.917	2.862	2.236	4.205	2.979	2.152
209714_s_at	CDKN3	2.302	2.39	2.516	2.208	3.091	3.096	2.731	2.613	2.127	2.778	2.793	2.28	2.505	2.451	3.303	2.883	2.223	2.24	2.331	2.666	2.565	2.574	2.681	3.008	2.685	2.74	2.23	2.082	2.204	2.851	2.226	2.802	2.321	2.61	3.432	2.733	2.922	2.834	2.975	3.779	3.078	2.824	2.977	2.696	2.138	3.712	3.192	2.292
213548_s_at	CDV3	3.909	2.855	4.034	3.371	3.255	3.14	3.264	3.991	3.086	3.607	3.792	3.251	3.432	3.943	3.544	3.974	3.427	3.941	4.119	3.253	3.577	3.184	3.085	3.497	3.566	3.922	3.845	3.382	3.544	3.374	3.204	3.516	3.181	3.493	4.395	3.873	4.513	3.746	4.309	3.37	3.666	3.686	3.535	3.805	3.786	4.41	3.364	3.384
213006_at	CEBPD	4.352	4.696	4.342	4.818	3.108	4.41	4.393	4.661	3.662	4.615	3.88	4.766	4.654	3.637	4.187	3.614	5.256	4.421	4.552	3.884	4.337	3.585	4.546	3.746	4.097	4.478	5.839	4.135	5.628	2.174	4.431	4.521	3.032	3.633	4.1	4.097	3.635	4.279	4.134	4.348	4.325	4.469	4.127	3.553	4.295	3.894	4.006	4.244
205046_at	CENPE	2.215	1.991	1.925	2.01	1.905	2.441	2.152	2.084	2.239	2.307	2.064	1.943	2.118	2.365	2.378	2.26	2.905	2.114	2.203	2.162	2.86	2.384	2.136	2.188	2.349	2.08	2.609	2.422	1.817	2.31	2.337	2.131	2.245	2.664	4.328	2.872	3.536	2.202	3.275	2.917	2.06	3.109	2.039	2.056	2.449	3.405	2.415	2.042
222848_at	CENPK	2.518	2.527	3.342	2.151	4.195	5.318	2.111	2.538	3.298	2.546	4.415	1.919	3.422	2.67	4.084	3.881	2.517	4.035	3.785	3.433	2.437	3.657	3.205	2.676	4.502	4.293	2.172	2.531	2.657	2.028	2.534	4.6	3.837	4.073	5.547	3.94	5.287	5.093	4.767	4.048	2.45	5.363	2.252	2.966	4.669	4.532	5.048	4.322
1554271_a_at	CENPL	3.104	2.915	3.345	3.38	3.031	3.267	2.606	3.857	2.592	3.498	2.961	3.169	3.807	3.393	3.181	3.341	2.893	3.235	2.985	2.483	2.787	3.039	3.018	3.059	2.799	4.188	3.106	2.791	2.791	2.55	2.673	3.003	3.087	3.404	3.693	4.306	3.282	3.043	3.574	3.096	3.316	3.612	3.092	2.867	3.56	3.437	3.202	3.24
232065_x_at	CENPL	3.275	3.458	4.171	4.089	4.469	4.086	3.831	4.158	3.824	3.987	3.535	2.887	4.111	3.911	3.764	3.934	3.426	3.644	3.756	3.67	3.654	3.566	3.988	3.504	3.882	4.646	3.582	3.617	3.687	3.298	3.418	3.945	3.632	3.766	4.963	3.669	3.365	3.446	3.705	3.671	3.502	4.45	3.396	3.632	3.721	3.673	3.683	3.804
218741_at	CENPM	4.161	3.958	4.037	4.141	4.342	4.376	4.77	4.278	4.396	4.248	4.196	4.125	3.867	3.887	4.886	4.588	3.773	3.907	3.866	4.268	4.026	4.626	4.381	4.084	4.292	4.435	3.937	4.012	4.179	4.783	4.426	3.751	4.526	3.804	4.839	4.461	4.659	4.028	4.978	4.867	4.569	4.577	5.034	4.614	4.162	5.179	4.312	3.95
226118_at	CENPO	3.351	2.886	4.038	3.266	4.007	3.243	3.955	3.598	3.915	4.176	3.547	3.637	3.681	3.495	4.159	3.836	3.427	4.042	3.438	3.81	3.904	4.158	3.469	3.833	3.75	3.919	3.502	3.87	3.554	4.107	3.879	4.371	3.476	3.883	4.833	4.339	4.486	3.661	4.02	4.368	4.097	4.461	4.285	4.654	4.207	4.105	3.941	3.952
218883_s_at	CENPU	2.754	2.44	3.324	3.086	3.184	4.466	3.088	3.11	3.094	3.249	2.947	1.975	3.091	2.784	4.355	3.661	2.623	3.487	3.925	3.378	3.863	3.046	2.944	3.002	2.935	3.547	3.683	3.274	2.707	2.442	2.922	2.934	2.641	3.878	5.03	3.222	3.759	3.525	4.248	4.526	2.905	4.754	2.847	3.266	3.553	4.693	4.267	2.701
229304_s_at	CENPU	3.045	3.372	3.815	3.174	3.409	4.081	3.743	3.681	3.401	4.068	3.92	2.832	3.471	3.12	3.922	2.87	3.531	3.862	3.224	3.528	2.811	3.797	3.409	2.784	3.46	4.1	3.42	3.185	2.986	3.004	3.366	3.957	3.275	3.449	3.856	3.523	3.456	3.387	3.155	3.825	2.914	4.127	3.171	3.441	3.537	3.528	4.107	3.016
229305_at	CENPU	1.941	2.054	2.08	1.849	2	2.448	2.07	2.086	2.339	2.12	2.022	2.315	2.143	1.855	2.559	2.01	2.308	2.205	2.011	2.082	2.069	1.948	2.031	2.38	2.257	2.21	2.22	1.989	2.045	2.012	2.225	2.181	2.466	2.331	2.542	2.298	2.317	2.545	2.479	2.909	2.282	2.538	2.319	2.188	2.148	2.176	2.262	2.411
226610_at	CENPV	4.284	4.384	4.899	4.189	4.861	5.257	5.215	5.478	5.12	5.017	5.025	4.201	4.86	5.245	5.048	5.336	4.765	4.979	4.685	5.166	4.48	4.841	4.922	4.474	4.715	5.048	4.498	4.946	4.771	4.92	5.083	5.032	4.987	4.608	3.818	4.725	4.418	4.67	3.607	4.875	4.242	5.301	5.133	4.968	4.116	5.274	6.072	4.368
226611_s_at	CENPV	4.738	5.241	5.292	4.946	5.363	5.496	5.738	5.599	5.785	5.515	5.34	3.971	5.272	5.199	5.628	5.513	5.306	5.943	5.123	5.223	5.501	5.233	5.38	5.133	5.163	5.703	4.919	4.7	5.101	5.364	5.573	4.788	5.202	5.11	3.967	5.227	4.621	4.821	4.343	5.203	4.832	5.516	5.368	5.484	4.668	5.877	6.522	4.708
226936_at	CENPW	3.823	3.525	3.405	4.16	3.334	4.665	4.05	3.932	3.667	3.262	3.535	3.87	3.944	3.055	4.803	4.126	3.733	4.007	4.198	3.917	3.796	4.275	3.76	3.899	4.241	4.215	3.571	3.462	3.385	4.036	4.214	3.57	3.394	3.159	4.924	4.077	3.753	4.408	4.536	4.753	4.096	4.212	4.409	4.38	3.877	4.795	3.826	3.879
1554606_at	CEP120	2.168	2.248	3.075	2.594	2.059	2.692	2.062	2.799	2.528	3.077	2.305	2.25	2.231	2.097	2.66	2.415	2.138	2.854	2.561	2.216	2.191	2.285	2.236	1.845	2.415	2.561	2.823	2.371	2.238	1.966	2.316	2.479	2.032	2.883	3.693	2.815	3.302	1.815	2.989	1.936	2.121	2.558	1.899	2.13	2.632	2.471	2.348	2.474
235956_at	CEP126	3.492	4.164	4.689	4.476	4.116	4.396	4.066	5.085	4.602	4.523	4.599	2.665	4.618	3.519	4.076	4.375	3.856	4.699	4.072	5.108	3.992	3.324	4	3.957	4.289	4.861	3.932	3.665	3.847	3.854	3.6	4.05	4.619	4.676	3.438	3.342	3.793	3.331	4.197	3.986	2.816	4.16	3.471	3.386	3.949	4.044	3.949	3.861
236325_at	CEP126	1.673	1.958	2.098	1.766	2.505	2.054	2.015	1.842	1.958	2.024	1.593	1.691	1.829	2.064	1.659	2.139	1.83	1.873	1.774	2.137	1.552	2.051	2.025	1.633	2.146	2.161	2.087	1.7	2.014	1.676	1.767	2.215	2.297	2.352	1.787	1.43	1.969	1.703	2.036	1.741	1.737	2.289	1.612	1.632	1.829	1.761	1.826	1.949
1557756_a_at	CEP128	1.973	2.555	2.257	2.338	2.01	1.989	2.328	2.403	2.341	2.287	2.116	2.079	2.258	1.949	2.383	2.341	2.353	2.309	2.121	1.719	1.948	2.386	2.379	1.976	2.161	1.81	2.262	2.144	2.213	2.186	1.754	2.253	2.255	2.038	2.753	2.026	2.487	2.245	3.33	2.298	2.123	2.582	1.89	2.129	2.506	2.396	2.061	2.042
232635_at	CEP128	3.259	2.955	3.119	3.163	2.859	3.094	3.009	2.932	2.727	2.949	3.194	2.709	3.211	3.114	3.627	3.46	2.907	3.026	3.226	3.325	3.507	3.127	2.793	2.608	2.832	2.801	3.205	3.182	2.922	2.712	2.948	2.802	3.192	3.079	4.014	3.005	3.395	2.822	4.264	3.218	3.764	3.163	2.987	3.006	3.018	3.75	3.162	3.07
244033_at	CEP128	2.936	3.487	3.174	4.477	3.818	4.506	3.945	3.986	3.986	3.817	3.867	2.619	3.746	3.43	5.669	4.473	3.783	4.226	3.44	3.613	3.842	3.756	3.702	3.429	4.131	4.066	3.786	3.952	4.198	3.884	3.289	4.05	3.574	4.18	5.386	4.128	4.203	3.818	5.536	3.962	3.671	4.627	3.603	3.691	4.347	4.276	3.809	3.775
206006_s_at	CEP162	2.78	2.898	2.861	3.566	3.338	3.926	3.285	3.181	3.088	4.127	3.072	3.303	3.578	2.744	3.481	3.35	3.308	3.666	3.336	3.571	3.407	3.367	2.923	2.99	3.257	3.579	3.601	3.067	3.57	3.038	3.328	3.488	2.484	3.399	4.768	3.485	3.589	4.136	3.844	3.335	3.384	4.397	2.937	3.093	2.877	3.907	3.644	3.411
1553158_at	CEP19	6.872	6.736	5.596	6.823	6.051	5.914	6.724	5.988	6.269	6.488	6.661	7.253	6.921	6.426	6.271	6.42	6.348	6.186	6.759	5.328	6.751	5.652	5.972	6.106	6.531	6.551	6.384	6.497	6.831	5.751	6.005	5.975	6.008	6.586	6.161	5.842	5.498	6.178	5.645	4.9	6.087	4.942	6.021	6.642	5.586	5.499	5.809	6.376
205250_s_at	CEP290	3.512	3.767	3.974	4.095	4.084	5.218	4.037	4.37	4.413	5.026	3.925	3.474	4.077	3.862	4.534	3.845	3.961	4.561	4.13	3.969	4.212	4.183	4.054	3.641	4.261	4.077	4.025	3.98	3.592	3.361	3.61	4.327	3.173	4.025	5.736	4.165	5.18	4.599	4.898	4.329	3.61	5.395	3.14	3.94	4.18	5.092	5.226	4.207
221683_s_at	CEP290	2.954	3.318	3.046	3.616	2.443	3.198	2.942	3.391	2.62	4.058	3.287	2.979	3.04	3.306	2.592	3.209	2.563	3.855	3.982	2.362	4.132	2.739	2.517	2.726	2.532	3.085	3.211	3.549	2.682	2.66	2.246	2.704	3.012	3.041	4.37	3.388	3.804	2.599	3.734	2.821	2.802	2.678	2.555	3.183	3.416	3.45	2.723	3.03
215018_at	CEP295	2.985	2.158	2.47	2.293	2.647	2.303	2.646	2.841	1.787	2.331	2.338	2.45	2.681	2.869	2.042	2.29	3.129	2.058	2.824	2.444	2.303	2.324	2.564	2.704	3.235	2.784	2.102	2.317	2.863	2.631	2.462	2.752	3.097	2.863	2.09	2.226	2.544	2.241	2.21	1.832	2.745	2.302	2.666	2.661	2.38	1.861	2.005	2.225
213956_at	CEP350	5.095	5.009	4.836	5.827	4.192	4.281	4.137	6.362	4.45	5.061	4.345	5.741	5.494	6.764	4.018	6.533	5.333	6.754	6.641	5.264	5.446	4.291	4.586	6.088	6.87	4.911	4.81	5.72	4.652	4.614	4.606	4.202	5.902	6.037	5.881	4.631	5.958	3.839	5.839	3.821	5.956	4.114	3.895	5.863	4.616	5.293	3.71	5.196
213957_s_at	CEP350	6.046	6.669	5.606	7.185	5.546	4.762	5.697	7.241	5.922	6.575	5.238	6.487	6.759	7.293	5.497	6.948	6.087	6.764	7.411	5.848	6.51	5.647	5.678	6.826	6.902	5.538	6.186	6.565	5.99	5.347	5.276	4.189	7.005	6.812	6.105	5.41	6.178	4.633	5.947	4.691	6.583	4.824	4.725	5.991	5.505	5.568	4.804	5.757
228334_x_at	CEP44	5.304	5.561	6.426	5.861	5.661	6.864	5.181	6.362	5.571	6.658	6.453	4.279	6.003	5.178	6.023	5.918	5.833	6.2	6.056	5.906	5.774	5.765	5.828	4.993	5.554	6.736	6.025	5.906	5.813	4.751	5.114	6.239	4.824	5.49	6.785	6.091	6.26	6.109	6.329	6.245	5.198	6.839	4.949	5.54	6.476	6.398	6.557	5.638
209616_s_at	CES1	7.321	6.614	6.481	6.429	5.917	4.558	5.922	6.919	6.868	5.692	5.937	7.8	6.734	6.361	4.864	6.449	6.379	5.192	5.174	6.522	6.882	5.093	5.591	5.913	6.608	6.235	7.996	5.571	6.66	6.234	7.951	6.031	5.311	5.859	4.583	6.152	5.3	4.841	4.795	3.722	6.264	6.469	7.209	7.276	6.079	5.4	5.354	5.89
209662_at	CETN3	2.481	2.775	3.276	2.828	3.095	5.866	3.324	2.899	2.851	4.38	4.265	1.996	2.922	2.454	2.858	3.31	2.871	3.573	3.07	3.063	4.214	3.217	3.113	2.267	3.81	4.587	3.577	3.111	2.613	3.224	2.784	3.41	2.604	2.471	5.067	2.966	4.412	3.529	4.57	3.564	2.444	5.459	2.302	3.586	3.028	4.661	5.148	2.84
229169_at	CFAP70	2.71	2.971	2.738	2.671	2.695	2.94	2.85	2.569	2.994	2.746	2.427	2.811	2.833	2.386	2.608	2.036	2.668	2.291	2.619	2.904	2.729	2.643	2.808	2.493	2.397	1.941	2.695	2.846	2.74	2.456	2.964	2.364	2.914	2.54	2.359	2.629	2.47	2.376	2.686	2.533	2.704	2.417	2.243	2.373	2.403	2.3	2.849	2.33
229170_s_at	CFAP70	3.646	3.345	3.32	4.069	3.398	4.098	4.588	3.864	3.731	3.946	3.487	3.641	4.541	3.414	4.063	3.431	4.269	2.853	3.673	3.613	2.86	3.693	4.161	2.841	3.634	3.371	3.634	4.404	3.541	2.631	3.93	3.455	3.55	3.662	2.595	2.835	2.785	2.865	3.317	3.551	3.356	3.746	3.203	2.966	2.841	2.922	4.023	3.399
1555730_a_at	CFL1	8.336	8.436	8.443	8.35	8.108	7.843	8.527	8.176	7.665	7.871	8.075	8.545	8.14	8.196	7.576	8.342	8.005	8.742	8.107	7.521	7.973	7.82	7.921	8.415	7.594	7.993	8.458	8.628	9.237	7.982	9.058	7.379	8.158	7.974	7.632	8.578	9.844	8.162	10.114	8.927	8.214	7.943	7.977	7.473	9.185	7.779	8.225	7.953
224352_s_at	CFL2	2.649	3.511	4.463	4.251	3.494	4.729	3.117	4.142	3.085	4.441	4.488	2.846	3.74	3.04	3.565	3.617	3.225	4.762	4.005	4.101	3.552	3.868	4.029	3.071	3.397	5.012	4.003	3.654	3.19	3.268	2.912	3.676	2.372	3.474	4.813	4.554	3.987	4.518	4.511	4.219	3.175	5.034	2.561	3.492	3.923	4.786	4.434	3.244
224663_s_at	CFL2	3.558	3.867	4.034	3.934	3.912	4.71	3.934	4.096	4.287	4.453	4.507	3.747	4.26	4.01	4.709	4.207	3.47	4.576	4.066	4.224	4.14	4.637	4.372	3.732	4.136	4.68	3.815	3.779	4.044	4.123	3.775	4.523	3.354	3.381	4.125	4.485	4.4	4.43	4.617	4.788	3.375	4.889	3.89	4.199	4.252	5.098	4.634	4.187
233496_s_at	CFL2	2.471	2.072	2.422	2.426	2.247	2.928	2.074	2.892	2.493	2.524	2.79	2.174	2.291	2.334	2.633	2.438	2.731	2.741	2.387	2.437	2.324	2.469	2.517	2.347	2.236	2.563	2.127	2.193	2.475	2.005	2.195	2.26	2.405	2.219	2.23	2.462	2.618	2.423	2.856	2.271	2.337	2.819	2.35	2.132	2.456	2.839	2.449	2.632
214618_at	CFLAR	3.684	3.177	2.915	3.409	2.893	3.241	3.958	2.758	2.937	2.901	2.775	3.262	3.493	3.07	2.35	2.454	3.015	2.332	3.476	3.4	3.042	2.808	2.778	2.946	2.919	2.867	3.013	3.428	3.787	2.73	3.677	3.091	2.767	2.569	2.862	2.184	2.45	3.689	2.521	2.715	2.655	2.807	4.029	2.292	3.065	2.349	2.679	2.791
217654_at	CFLAR	6.451	5.513	4.68	5.892	4.349	4.573	5.846	5.175	4.925	4.82	4.934	6.285	5.848	4.986	4.161	4.556	5.234	4.649	5.236	4.712	5.557	4.295	4.666	5.139	5.784	5.289	4.973	5.388	5.283	5.726	5.667	4.496	5.907	5.255	4.019	4.329	4.923	5.106	4.187	4.188	5.311	4.666	5.285	4.665	5.351	3.707	3.646	5.56
201182_s_at	CHD4	6.372	6.84	5.833	7.263	6.324	5.61	6.614	7.423	6.257	6.351	5.741	6.981	7.357	7.166	5.581	6.754	6.151	6.84	6.867	6.359	6.93	5.538	5.9	6.903	6.927	5.968	5.951	7.218	5.889	6.562	6.235	5.848	7.437	6.84	6.369	6.169	6.13	5.094	6.223	5.236	6.92	5.012	5.611	6.595	5.984	5.621	4.661	6.536
201183_s_at	CHD4	7.421	7.217	6.673	7.555	6.344	5.688	6.911	7.458	6.312	6.738	5.813	7.449	7.393	7.772	6.073	7.198	6.19	6.942	7.274	5.976	7.376	5.383	6.039	7.497	7.464	6.839	6.48	7.401	6.459	6.712	6.336	5.808	8.003	7.424	6.689	6.613	6.637	4.966	6.648	5.238	7.165	5.314	6.414	7.047	6.715	5.962	5.33	6.679
209395_at	CHI3L1	10.814	8.669	7.7	7.257	8.791	7.234	9.109	9.511	8.524	9.379	8.169	9.249	9.901	4.576	9.405	8.26	7.808	8.21	8.296	7.937	7.523	7.093	8.862	7.314	9.009	8.135	9.755	7.557	10.352	7.497	9.953	8.692	8.584	8.766	4.556	7.867	5.216	7.483	5.781	7.774	8.925	6.758	8.556	7.701	8.123	2.349	5.977	8.469
209396_s_at	CHI3L1	9.802	7.327	6.562	5.822	7.661	6.243	7.877	8.175	7.347	8.022	7.884	8.212	8.58	2.84	8.136	7.155	6.429	6.916	7.082	6.667	6.524	6.323	7.4	6.546	7.857	6.867	8.719	6.466	9.12	6.45	8.677	7.483	7.408	7.301	3.733	7.15	3.719	6.561	4.373	6.307	7.966	5.338	7.266	6.791	7.061	2.444	4.762	7.31
213060_s_at	CHI3L2	5.757	5.443	5.75	5.433	6.667	6.002	5.692	6.367	6.025	5.978	5.477	5.789	5.458	5.758	5.708	6.084	5.851	6.783	5.387	6.386	5.071	6.731	5.671	5.443	6.147	7.057	5.682	5.37	5.47	7.287	5.475	5.532	5.867	6.339	8.362	6.491	5.935	6.082	6.028	7.388	5.654	7.11	7.018	5.651	6.361	6.29	7.054	5.764
1569183_a_at	CHM	1.713	1.684	1.677	1.632	1.755	2.095	2.219	1.783	1.602	1.738	2.204	1.608	1.772	1.717	2.148	1.704	1.977	1.574	1.655	1.768	1.746	1.861	1.478	1.768	2.028	1.82	1.765	2.334	1.816	1.709	1.58	1.779	1.89	1.512	2.041	1.815	1.988	2.004	2.235	1.939	1.729	2.122	1.591	1.837	1.744	1.795	1.995	1.962
207099_s_at	CHM	2.378	2.069	2.519	2.722	1.879	1.973	2.13	2.251	2.287	2.357	2.592	2.494	2.285	2.465	2.498	2.341	2.245	2.497	2.504	2.197	2.142	2.499	2	2.699	2.633	2.337	2.034	2.536	2.212	2.328	1.998	2.098	2.408	2.443	2.478	2.27	2.309	2.232	2.593	2.062	2.527	2.376	2.006	2.403	2.688	2.838	2.23	2.519
239436_at	CHORDC1	1.605	1.976	2.053	1.772	2.12	1.958	2.617	2.053	2.116	2.037	2.022	2.197	1.886	1.959	2.208	2.087	1.91	1.985	2.082	1.931	1.687	1.917	1.77	2.006	1.968	1.601	2.193	1.966	1.913	2.056	1.734	1.956	1.827	1.84	2.153	2.01	1.738	2.277	1.986	1.876	1.839	1.769	1.993	1.936	1.904	2.079	2.02	2.165
206703_at	CHRNB1	3.85	3.919	3.567	3.76	3.739	3.752	4.157	3.718	4.004	3.906	4.373	4.173	3.816	3.524	3.701	3.831	3.614	3.96	2.925	3.649	3.692	4.084	3.687	3.877	4.249	4.259	3.686	3.873	3.63	4.393	3.891	3.844	3.849	4.006	4.067	4.21	3.912	3.983	4.442	3.915	4.216	4.353	3.975	4.735	3.882	4.81	4.122	3.762
239647_at	CHST13	7.534	7.059	6.748	6.304	6.422	5.257	7.465	6.048	5.704	4.875	7.272	6.507	6.713	5.082	5.532	6.621	5.993	5.608	6.613	5.685	4.787	6.708	5.14	5.62	5.164	6.948	6.712	6.437	7.977	6.537	8.035	6.569	6.828	6.843	5.234	6.156	5.367	5.285	4.694	5.27	6.149	5.249	6.959	7.149	5.39	5.481	6.63	5.363
244874_at	CHST15	4.696	3.609	3.489	4.307	3.439	2.874	4.299	3.506	4.279	3.597	3.398	3.873	3.846	3.59	3.92	2.917	4.423	3.289	3.758	3.93	3.575	3.475	3.411	3.973	4.086	3.19	3.503	2.592	4.021	3.701	4.483	3.634	3.685	3.745	3.019	3.63	3.037	3.811	3.344	3.151	4.15	3.177	3.809	3.687	3.009	2.859	3.289	4.25
1553810_a_at	CIP2A	1.68	1.874	1.813	1.909	1.662	1.895	1.491	2.086	1.792	1.98	1.766	1.707	1.727	1.911	1.844	1.915	1.847	1.595	1.763	1.73	1.917	1.546	1.755	1.748	1.616	1.898	1.925	1.785	1.841	1.696	1.604	2.183	1.617	1.618	1.993	1.848	1.841	1.641	1.784	1.861	2.259	2.069	1.664	1.941	1.781	1.971	1.708	1.88
231855_at	CIP2A	2.141	1.727	2.004	1.96	1.865	2.224	1.855	1.967	2.052	2.349	2.736	2.027	1.904	2.176	1.983	2.141	1.952	2.018	1.968	1.769	1.791	2.185	1.803	2.08	2.141	2.197	2.079	2.069	2.257	2.038	2.011	2.097	1.751	2.093	2.628	2.876	2.141	2.157	2.294	2.577	2.06	2.564	2.029	2.044	2.256	2.336	2.121	1.927
201897_s_at	CKS1B	4.324	4.592	4.764	4.715	5.134	6.123	4.969	4.679	4.955	5.706	6.21	4.646	4.915	4.549	5.899	5.377	5.295	4.982	4.97	5.205	5.364	5.502	5.189	5.177	5.548	6.117	5.205	5.308	4.589	5.52	4.98	5.058	5.24	5.185	6.101	5.077	5.347	5.841	5.931	6.061	5.038	6.274	5.511	5.567	5.143	6.293	6.241	5.008
212308_at	CLASP2	4.019	4.154	5.367	4.565	4.913	5.643	4.69	5.467	4.853	5.544	5.342	3.539	4.775	4.621	5.216	4.986	4.869	5.598	4.838	4.965	4.66	4.652	4.892	4.339	4.716	5.433	4.889	4.874	4.604	4.404	3.81	5.058	4.585	4.801	5.403	4.912	5.008	4.841	4.924	4.867	4.103	5.682	4.118	4.263	5.1	5.134	4.909	4.76
201732_s_at	CLCN3	4.524	5.754	4.888	5.778	5.507	4.626	5.571	6.049	5.87	5.705	4.691	5.625	5.326	6.26	4.493	6.228	5.641	5.837	6.11	5.176	5.719	4.422	4.94	5.055	6.108	3.822	5.261	6.258	4.62	5.13	3.983	4.831	5.51	5.403	6.279	4.921	5.378	4.406	5.053	4.172	5.701	4.034	4.459	5.438	4.383	5.728	5.24	5.672
201733_at	CLCN3	3.751	4.217	4.157	5.179	4.579	4.107	4.759	4.267	4.049	4.296	4.048	4.547	4.206	4.171	4.116	4.409	4.449	4.337	4.258	2.873	3.992	3.781	3.922	3.932	3.954	4.051	3.654	4.02	3.292	3.81	2.446	4.529	4.358	4.193	5.116	4.903	5.288	3.567	5.094	3.334	3.832	3.93	2.528	4.262	4.157	4.995	4.097	4.654
1556209_at	CLEC2B	5.671	5.303	5.49	7.09	6.357	6.878	5.965	5.959	5.439	5.758	5.936	5.884	5.837	6.206	6.197	5.648	5.592	5.749	6.222	5.435	6.375	5.831	5.527	5.505	5.584	5.648	6.304	5.365	6.279	5.128	5.301	5.639	5.729	6.771	6.498	5.029	6.553	6.113	6.353	5.538	5.418	5.917	5.831	5.609	6.575	5.401	6.292	5.627
209732_at	CLEC2B	5.634	5.979	5.705	6.478	6.168	8.676	6.19	5.807	5.566	7.114	7.582	5.673	6.426	5.344	5.712	5.89	5.75	6.044	6.271	5.967	8.346	6.22	5.784	5.123	7.776	7.528	6.23	5.782	5.702	6.329	5.41	6.9	5.696	6.532	8.041	6.402	7.511	7.938	7.595	6.935	6.233	8.146	5.673	6.921	6.407	7.466	7.914	6.615
1552552_s_at	CLEC4C	4.371	3.901	3.619	3.129	2.631	3.715	3.469	3.252	2.633	3.618	3.348	3.123	2.792	2.944	4.134	3.474	3.045	3.787	4.43	3.324	2.953	3.827	4.385	3.258	3.038	4.433	3.097	2.976	3.103	3.486	3.125	3.76	2.437	3.068	2.471	2.73	2.925	3.225	2.481	3.324	2.922	3.643	2.555	2.393	2.707	2.854	4.744	2.512
1555687_a_at	CLEC4C	4.444	3.528	3.217	3.123	2.744	3.131	2.446	3.541	2.582	3.195	3.159	3.187	3.028	3.182	2.794	3.003	3.164	3.448	4.849	3.099	2.794	2.656	3.476	2.684	2.599	4.87	2.884	2.895	2.707	3.174	2.887	2.997	2.687	3.371	2.785	2.725	1.888	2.539	1.913	2.453	3.399	2.582	2.45	2.397	2.747	2.512	3.176	2.977
1554406_a_at	CLEC7A	5.973	5.008	6.137	6.781	5.28	6.54	5.849	6.039	5.257	6.434	6.959	5.941	6.278	5.918	5.795	5.929	6.085	6.48	6.827	5.856	6.792	6.002	5.882	5.673	6.638	6.508	6.523	5.798	6.068	5.45	5.405	5.911	5.458	6.599	6.614	6.081	6.319	7.052	6.719	6.115	6.632	5.998	5.586	6.07	6.257	6.139	6.535	6.008
1555213_a_at	CLEC7A	2.911	2.764	2.711	2.689	2.29	2.584	2.88	2.884	2.577	2.331	2.772	2.863	2.486	2.784	2.638	2.829	2.634	2.218	3.003	2.782	2.52	2.518	2.934	2.724	2.306	2.554	2.651	2.787	2.815	2.664	2.877	3.066	2.936	2.956	2.356	2.539	2.545	2.767	2.586	2.318	2.487	2.604	2.81	2.331	2.734	2.394	2.619	3.379
1555214_a_at	CLEC7A	5.437	4.973	5.08	5.924	4.178	5.025	5.294	5.309	5.068	5.332	5.277	5.234	5.274	4.675	4.986	5.054	5.2	5.703	6.298	4.83	5.465	5.049	5.039	4.449	4.907	5.18	5.985	5.117	5.28	4.14	4.537	5.149	4.701	6.078	5.332	5.286	5.518	5.767	5.361	4.423	5.408	4.419	4.832	4.583	5.631	4.325	4.839	5.077
1555756_a_at	CLEC7A	8.136	6.658	7.049	7.749	6.907	7.788	7.496	7.007	5.901	7.305	7.479	6.937	7.241	7.385	6.9	7.659	8.409	6.983	8.281	6.45	8.045	6.345	6.655	6.66	8.592	7.518	7.521	6.948	8.381	6.454	7.597	8.118	6.231	8.086	7.574	6.747	7.212	7.732	7.847	6.386	7.645	6.376	6.005	6.898	6.639	6.595	7.273	6.924
241098_at	CLEC7A	2.252	2.536	2.161	2.723	2.426	2.218	2.229	2.077	1.954	2.492	2.262	2.366	2.276	2.074	1.901	2.483	1.964	2.373	1.899	1.844	2.401	2.009	1.861	2.346	2.513	2.37	2.056	2.337	2.144	2.049	2.231	2.405	1.886	2.096	2.077	1.99	2.18	1.915	2.162	1.991	2.318	1.837	2.049	2.158	1.849	2.274	1.935	2.434
230609_at	CLINT1	2.162	1.932	2.247	2.004	1.965	1.963	1.944	2.416	2.138	1.652	2.292	1.932	1.934	2.176	1.716	1.922	1.99	1.94	1.963	2.108	1.958	2.247	2.092	2.15	2.429	2.071	1.702	1.855	1.838	1.969	1.698	2.043	1.666	1.986	2.12	1.757	2.191	1.871	1.873	1.999	2.041	2.281	2.135	2.009	1.816	1.81	1.984	1.648
211136_s_at	CLPTM1	4.043	3.963	3.784	3.437	3.851	3.344	3.912	3.599	3.664	3.634	3.691	4.2	3.358	3.408	3.758	3.658	3.424	3.926	3.797	4.031	3.921	3.099	3.531	4.038	3.2	3.369	3.712	3.121	4.373	4.308	5.108	3.419	3.538	3.516	3.272	4.09	4.409	4.273	3.97	4.159	4.408	4.361	4.478	4.138	4.005	3.512	3.733	3.545
225009_at	CMTM4	4.582	4.318	4.197	4.679	4.071	3.487	3.531	5.657	3.736	3.753	4.565	4.112	4.914	3.294	3.987	3.639	2.967	4.543	4.584	4.265	3.97	3.367	3.598	4.187	3.982	3.807	4.048	4.04	3.954	3.517	3.861	3.726	4.396	3.825	3.287	3.912	3.369	3.4	3.471	2.797	4.437	3.442	3.565	4.117	4.213	3.604	3.59	3.724
230942_at	CMTM5	5.171	6.463	6.815	6.672	7.788	5.917	6.972	6.383	7.01	6.475	7.202	6.978	5.853	6.729	6.74	6.496	6.697	6.45	6.213	6.015	7.534	7.273	6.568	7.016	5.735	5.225	6.811	7.835	7.426	6.742	6.521	6.317	5.752	4.744	5.163	6.594	6.635	7.297	5.828	6.666	7.192	5.52	7.505	7.051	6.214	6.444	7.066	6.061
1565657_at	CMTM6	1.999	1.832	1.744	1.932	1.881	1.608	1.982	2.058	1.665	1.735	1.829	2.238	1.923	2.174	1.667	2.213	1.944	2.051	2.156	1.629	1.863	1.928	1.803	1.964	2.012	1.899	1.683	2.003	1.704	2.011	1.767	1.765	1.86	1.946	1.705	1.718	1.634	1.705	1.88	1.592	1.945	1.709	1.71	2.138	1.747	1.785	1.6	1.957
227953_at	CMTM6	4.994	3.595	4.637	4.492	3.751	4.147	4.068	4.037	3.615	4.099	4.227	3.886	3.917	3.886	3.781	4.294	4.413	3.969	4.308	3.795	3.733	3.542	3.754	4.34	3.87	4.701	3.864	3.798	4.165	3.425	3.629	4.418	3.927	4.044	4.27	4.332	3.888	3.772	3.824	3.402	4.003	3.753	3.703	4.112	4.093	4.672	3.22	3.852
218728_s_at	CNIH4	5.415	5.767	5.062	6.353	5.908	7.568	5.791	5.099	5.265	6.253	6.964	6.264	6.593	4.903	5.983	6.344	6.117	5.814	5.651	5.907	5.978	5.862	5.782	5.387	6.903	7.204	6.553	6.328	5.778	6.443	5.471	6.675	5.4	6.174	6.855	5.539	6.112	7.038	6.979	6.848	5.805	6.692	5.32	6.434	5.703	6.705	6.746	6.654
222721_at	CNIH4	8.858	7.38	7.708	7.786	7.32	7.283	8.085	7.624	6.663	6.843	6.96	8.211	8.021	8.084	7.33	7.491	8.381	6.496	7.845	7.584	7.549	6.706	7.739	7.512	8.352	7.805	6.761	7.69	8.529	7.676	8.259	7.854	7.918	7.669	5.962	6.706	6.485	6.785	5.742	6.405	7.723	6.603	7.709	7.274	6.861	5.104	6.336	6.872
228437_at	CNIH4	4.35	3.815	3.786	4.824	4.381	5.642	4.329	4.667	4.33	4.543	5.23	4.204	4.915	2.891	4.514	4.213	4.31	4.139	4.215	3.806	4.198	4.514	4.106	3.421	4.457	4.557	5.124	4.349	4.038	4.519	4.404	4.73	3.275	4.305	4.505	4.376	4.699	5.376	4.678	4.883	3.926	5.326	4.51	4.354	4.268	4.76	5.036	5.199
243051_at	CNIH4	4.828	4.136	4.302	4.698	3.825	4.237	3.722	4.147	4.28	3.513	4.282	5.042	4.72	4.708	3.646	4.587	3.848	3.762	4.133	3.336	4.486	3.827	3.984	4.647	4.367	4.248	3.721	4.074	3.985	5.294	5.049	4.545	4.777	3.968	3.655	4.019	3.955	4.384	3.909	3.741	4.689	4.158	4.367	4.026	4.405	3.644	3.652	3.968
1554052_at	CNOT1	3.536	3.236	3.672	3.838	3.693	3.441	3.479	3.82	3.134	3.282	3.656	3.233	3.738	3.543	3.625	3.727	3.559	3.27	3.578	3.328	2.86	3.664	3.653	3.705	3.584	3.175	3.596	3.176	3.85	3.206	3.926	3.4	2.807	4.018	4.089	3.801	3.688	3.616	3.837	3.791	3.026	3.74	4.047	3.425	3.461	3.777	3.764	3.773
1553266_at	CNOT6L	1.861	1.781	1.616	1.973	1.873	1.751	2.121	2.191	1.731	1.836	1.891	1.891	1.711	1.953	1.719	1.851	1.982	1.952	1.711	1.873	1.758	1.688	1.677	1.917	1.906	1.934	1.862	2.218	1.688	1.794	1.766	1.732	2.26	2.118	2.522	1.763	1.942	1.766	1.926	1.653	1.811	1.963	1.722	2.091	1.65	1.761	1.807	1.951
1553267_a_at	CNOT6L	2.033	1.894	2.033	2.105	1.814	2.202	1.756	1.991	1.894	2.115	1.965	1.808	2.099	1.893	2.121	2.061	1.9	2.246	2.022	2	1.773	1.918	1.814	2.03	1.945	2.391	1.824	1.9	1.549	2.035	1.959	1.786	2.042	1.691	2.089	2.18	2.408	1.954	2.181	2.092	2.606	1.895	1.857	2.274	2.048	1.962	1.768	2.216
238438_at	CNOT6L	3.019	3.394	3.85	3.517	3.149	3.684	2.469	2.084	3.66	3.558	4.565	2.814	3.427	2.801	3.394	3.126	2.767	3.74	3.462	2.745	3.022	3.286	2.67	2.686	2.703	3.889	3.423	2.815	2.935	2.492	2.5	2.786	2.553	3.127	4.647	2.702	4.018	2.85	4.112	2.838	3.449	4.495	3.213	2.859	4.31	2.73	3.503	2.721
1552344_s_at	CNOT7	3.76	3.637	4.782	4.656	3.785	5.183	3.574	5.008	4.424	5.241	5.313	3.637	4.433	4.296	4.285	4.682	4.539	4.892	4.745	3.762	4.167	3.79	4.022	3.48	3.983	5.534	4.99	4.273	4.549	3.19	3.22	4.111	3.877	4.193	4.248	4.248	4.845	4.262	5.072	4.188	3.921	4.436	3.3	4.287	4.863	4.841	4.542	3.895
1554080_at	CNOT9	3.664	3.342	3.965	4.046	3.835	4.758	4.053	4.099	3.467	4.347	4.68	3.367	3.677	3.05	4.859	4.486	4.043	4.138	4	3.977	3.983	4.094	3.948	3.652	4.053	4.861	4.071	3.803	3.661	3.99	3.587	4.387	3.343	3.769	5.145	4.112	4.401	4.429	4.695	4.698	3.517	5.154	3.951	4.105	4.186	4.877	4.894	4.016
213903_s_at	CNOT9	3.007	2.839	2.989	2.925	2.758	2.953	2.849	2.732	2.817	2.723	3.147	3.238	2.283	2.889	2.839	3.029	3.096	2.52	2.467	2.839	2.676	3.122	2.594	2.92	2.989	2.444	2.881	2.92	2.655	2.966	2.644	2.41	2.541	2.904	2.926	3.339	3.006	2.905	2.94	2.968	2.992	3.149	2.985	3.035	2.879	3.273	2.706	2.703
236684_at	CNOT9	2.634	2.56	2.323	2.544	2.387	2.527	2.807	2.196	2.303	2.023	2.741	2.155	2.239	2.49	2.616	2.017	2.35	2.05	2.208	2.203	2.36	2.548	1.922	2.254	2.424	2.578	2.41	2.626	2.186	2.02	2.452	2.222	2.626	2.428	2.049	2.35	2.54	2.551	2.188	2.391	1.865	2.057	2.381	2.671	1.947	2.436	2.192	2.388
1554660_a_at	CNST	3.2	3.084	4.014	3.34	3.017	3.21	3.107	4.095	3.189	3.528	2.987	3.594	3.348	5.359	3.213	4.786	2.888	3.67	3.615	2.907	3.687	2.723	2.955	3.631	3.914	3.267	3.369	3.844	3.135	3.075	2.616	2.416	3.652	3.922	3.824	3.091	3.596	2.834	3.296	3.031	4.119	2.992	2.865	3.385	2.779	3.634	3.092	2.909
1554661_s_at	CNST	3.938	3.948	4.815	4.046	3.892	4.038	3.848	5.031	4.226	4.444	4.342	4.361	4.432	5.598	3.919	5.266	4.198	4.743	4.748	3.934	4.369	3.676	4.161	4.578	4.851	4.22	4.535	4.4	3.954	3.957	3.384	3.842	4.435	4.578	4.585	4.573	4.119	3.842	4.517	3.582	4.474	3.986	3.581	4.133	4.028	4.601	3.711	4.093
227089_at	COG5	4.41	4.296	4.625	4.359	4.386	5.037	4.604	4.472	4.373	4.688	4.528	3.748	4.709	3.848	4.582	4.407	4.817	4.548	4.404	4.435	4.039	4.602	4.343	3.641	4.526	5.146	4.696	4.129	4.511	3.864	3.941	5.088	3.599	4.594	4.771	4.887	4.491	4.969	4.384	4.584	3.896	4.833	4.129	4.485	4.597	5.399	4.543	4.671
202467_s_at	COPS2	5.257	6.574	6.204	6.899	7.219	8.954	6.429	6.317	6.512	8.28	8.539	6.63	7.636	6.751	7.509	7.785	7.274	7.343	7.316	7.21	8.318	7.446	6.637	6.041	8.222	7.998	7.136	7.159	6.291	7.547	6.73	7.591	5.373	7.391	8.713	7.419	7.994	8.221	8.261	8.193	6.785	8.477	6.379	8.1	6.856	8.293	8.458	7.57
209838_at	COPS2	2.553	3.317	3.542	3.954	3.546	4.497	3.848	3.845	3.271	5.311	4.979	3.126	3.807	3.711	4.157	3.807	3.968	4.074	3.877	4.044	3.892	3.542	3.343	3.164	3.769	4.206	4.085	3.598	3.642	3.821	3.621	4.452	3.168	3.918	4.675	4.173	4.087	4.641	4.667	4.507	3.068	4.909	3.365	4.109	4.211	4.431	4.713	3.749
239260_at	CORIN	3.457	2.773	2.517	2.687	2.43	3.42	2.503	2.377	2.473	2.576	2.279	3.426	2.338	2.507	2.721	2.4	3.171	2.57	2.538	2.58	2.875	2.607	2.75	2.453	2.596	2.684	3.446	2.684	2.527	2.512	2.446	2.607	2.485	2.179	2.618	2.574	2.924	3.209	3.023	2.518	2.787	2.487	2.587	2.537	2.308	2.634	2.812	2.712
239261_s_at	CORIN	3.628	3.26	3.014	3.414	2.787	3.684	2.912	2.981	2.979	3.398	3.65	3.882	3.183	3.033	3.421	3.197	3.06	3.145	3.234	2.891	3.137	3.329	3.04	3.765	3.142	3.193	4.196	3.182	3.363	3.958	3.683	3.226	3.123	2.796	3.42	3.914	3.971	4.258	3.524	3.6	3.815	3.287	3.942	3.765	3.3	3.628	3.467	3.627
1557192_at	COX10-AS1	2.838	2.987	3.089	2.891	3.298	3.783	2.436	2.839	2.8	3.72	3.877	2.863	2.537	3.046	2.895	3.028	3.227	2.928	2.59	2.702	3.148	3.984	2.853	2.757	2.791	3.653	3.093	2.836	2.832	3.068	3.158	3.082	3.08	2.984	3.807	2.936	3.332	3.68	3.272	3.375	3.09	4.525	2.669	2.838	3.309	3.969	3.981	3.217
214277_at	COX11	1.781	1.911	1.773	1.899	1.755	1.959	1.95	2.093	1.81	1.84	1.781	1.573	1.807	1.688	1.85	1.802	2.108	1.87	1.889	2.025	1.795	1.793	1.511	1.579	1.879	1.955	1.472	1.926	1.605	1.711	1.552	2.007	2.197	2.09	2.042	1.725	1.784	1.701	1.702	1.904	2.03	1.918	1.674	1.607	1.638	1.861	1.895	1.729
1558346_at	COX17	4.187	4.301	4.43	4.538	4.234	5.211	3.792	4.687	4.453	4.994	5.24	3.656	4.249	4.363	4.326	4.713	4.819	4.796	4.643	4.282	4.059	4.803	4.338	4.646	3.638	4.693	4.787	4.68	4.165	4.08	3.983	4.728	4.055	4.587	5.079	4.714	4.771	5.115	5.203	4.776	4.353	5.303	4.05	3.871	5.021	4.686	4.871	4.154
201942_s_at	CPD	5.84	5.119	5.447	5.522	4.59	5.24	4.696	5.004	4.009	4.959	4.485	6.236	5.456	5.188	4.179	4.99	5.354	5.345	5.882	4.137	5.144	4.408	3.964	5.128	5.737	5.004	4.816	4.976	5.316	5.057	4.127	4.987	4.333	5.297	4.755	5.001	5.149	5.644	4.877	3.85	5.243	4.351	4.586	5.387	5.066	4.539	4.199	5.182
229600_s_at	CPD	2.839	2.439	2.254	2.226	2.368	2.507	2.605	2.312	2.138	2.01	2.138	2.16	2.555	2.199	1.971	2.145	2.193	1.991	2.193	1.612	2.075	2.509	2.132	1.96	1.961	2.08	2.132	2.165	2.455	2.304	2.016	2.236	2.434	2.114	2.425	2.154	2.423	2.374	2.167	2.382	2.301	2.068	2.529	2.132	2.039	2.618	2.302	2.197
226939_at	CPEB2	6.42	6.232	6.85	7.12	6.93	7.706	6.709	6.489	5.734	7.485	7.971	5.874	6.876	5.687	6.67	6.614	7.474	7.066	7.313	6.64	6.847	6.72	6.232	5.367	5.853	7.571	7.58	6.805	7.574	6.286	6.061	8.072	5.285	6.845	7.837	7.048	7.019	7.74	7.205	6.741	5.848	8.037	5.108	5.922	7.433	6.963	7.469	6.738
235462_at	CPEB2	2.013	1.964	1.821	1.808	1.983	1.782	2.318	1.883	1.75	1.834	1.911	2.313	2.074	2.108	1.717	2.025	1.797	1.752	1.74	1.889	1.931	1.605	2.004	1.663	2.084	2.139	2.332	1.974	1.826	2.008	2.034	1.925	1.957	1.762	1.815	1.936	1.671	2.114	1.749	1.784	1.811	1.807	1.713	1.638	1.999	1.599	1.906	1.829
224828_at	CPEB4	7.982	8.648	7.533	8.382	7.671	6.629	8.118	7.836	8.097	8.045	7.605	8.975	8.293	8.602	6.658	8.447	8.029	7.73	8.216	7.5	8.935	6.847	7.208	8.177	8.409	7.337	7.596	8.495	8.324	7.445	6.222	6.861	7.074	7.945	7.857	6.843	6.921	6.342	7.761	6.335	7.982	6.209	5.822	8.546	6.791	7.814	6.725	8.135
224831_at	CPEB4	5.935	5.568	6	6.151	5.702	6.691	5.65	5.65	5.151	6.27	6.522	5.769	6.241	5.161	6.008	5.767	6.082	5.563	6.148	5.275	6.036	5.619	5.471	4.539	5.157	6.484	5.995	5.67	6.21	4.989	5.087	6.368	4.398	5.886	6.558	5.747	5.83	6.602	6.295	5.665	5.169	6.432	4.661	5.57	6.237	5.92	6.683	6.228
206100_at	CPM	5.693	4.981	5.969	4.975	3.986	4.232	4.91	5.47	4.48	4.373	4.323	4.659	5.197	4.936	4.422	4.648	5.651	5.282	5.09	5.311	4.595	4.298	5.23	4.982	4.691	5.526	5.876	4.47	5.436	4.157	5.368	4.842	3.928	5.046	3.98	4.552	3.963	3.908	4.518	4.353	4.444	4.075	5.444	4.685	4.851	3.939	4.5	4.223
235019_at	CPM	3.297	3.634	3.516	3.085	2.602	2.813	3.012	3.809	3.712	2.709	3.391	3.046	3.481	3.239	2.568	2.871	2.831	3.423	3.281	2.581	2.799	2.841	2.53	3.106	3.319	3.628	3.218	3.351	3.291	3.63	3.938	3.157	2.987	2.761	2.996	3.215	2.83	2.448	2.891	3.194	3.29	2.799	3.463	3.07	2.87	2.881	2.39	2.772
241765_at	CPM	2.384	2.122	2.007	2.067	2.436	2.336	2.41	2.072	1.881	2.023	2.358	2.295	2.118	1.9	1.919	1.964	2.577	2.229	2.044	1.854	2.028	2.297	2.143	2.445	2.196	2.18	2.331	2.748	2.583	2.255	2.716	2.214	2.412	2.318	2.258	2.249	2.035	2.02	2.339	2.077	2.286	2.15	2.423	2.071	2.245	1.934	2.245	2.206
206244_at	CR1	7.105	6.246	6.523	7.456	5.528	6.593	6.454	6.232	5.302	5.584	5.888	7.016	6.414	6.118	5.578	5.561	6.502	5.415	7.247	5.055	5.712	5.566	5.16	5.267	6.03	5.841	5.542	6.163	6.252	5.416	4.771	5.945	5.575	6.44	5.198	5.777	5.66	5.439	5.707	4.425	5.819	4.776	5.379	5.667	5.771	4.537	5.1	6.741
208488_s_at	CR1	6.747	5.862	6.016	7.274	4.694	5.61	5.605	5.974	5.406	5.308	5.058	6.877	6.464	5.925	5.1	5.358	5.731	5.423	6.67	5.507	5.498	4.384	4.686	5.88	5.833	5.324	5.635	5.475	5.821	5.311	3.833	4.951	5.638	5.758	5.102	4.961	5.569	4.594	5.517	3.888	5.984	4.522	5.119	5.088	5.035	4.86	3.934	6.123
217484_at	CR1	4.832	4.186	3.812	4.559	4.303	3.884	4.235	3.789	3.739	3.916	3.755	5.547	3.889	3.802	3.674	3.407	5.032	3.678	3.092	4.608	4.194	3.684	3.182	2.861	3.618	3.514	4.808	4.109	4.443	3.974	3.761	4.522	3.322	3.968	4.215	3.284	3.152	4.504	3.263	3.795	3.683	3.38	4.536	4.851	3.735	3.378	5.178	3.89
211808_s_at	CREBBP	3.894	3.939	3.447	3.514	3.838	3.675	4.063	3.378	3.708	3.271	3.366	4.478	3.248	3.304	3.512	3.354	3.66	3.378	3.592	4.117	3.543	3.645	3.536	3.781	3.096	3.175	3.621	4.111	3.985	3.502	4.007	3.349	3.603	3.686	3.333	3.073	3.49	3.957	3.454	3.423	3.271	3.534	3.996	3.458	3.193	3.303	3.246	3.985
1554229_at	CREBRF	5.001	4.799	4.37	5.198	4.054	3.994	4.207	5.203	4.088	4.672	4.287	5.352	4.911	5.926	4.368	5.447	4.965	5.571	6.11	4.267	4.764	4.66	3.686	4.864	5.313	3.435	4.855	5.203	4.583	4.619	3.764	4.403	5.374	5.439	5.765	4.258	4.924	4.463	5.217	3.671	5.301	4.113	4.117	4.755	4.391	4.736	4.083	4.516
210171_s_at	CREM	1.957	1.99	1.66	2.034	2.087	1.664	1.718	1.817	1.74	1.637	2.21	2.339	1.707	2.005	1.729	1.912	1.895	1.796	2.017	1.803	1.915	1.701	1.919	2.236	1.869	1.892	1.926	2.113	1.796	1.631	2.103	1.786	2.043	2.19	1.901	2.104	1.972	2.015	1.979	2.133	2.112	1.879	1.913	1.777	1.655	2.153	2.064	1.898
228092_at	CREM	2.245	2.559	2.422	2.875	2.425	3.103	2.495	2.587	2.332	3.162	3.275	3.229	2.795	2.562	2.889	3.154	2.907	3.076	2.579	3.099	2.588	2.966	2.852	2.465	2.795	3.408	2.735	2.539	2.72	2.801	2.302	3.517	2.199	2.611	3.485	2.538	2.651	2.915	2.892	3.662	2.47	3.691	2.444	2.407	2.8	3.298	3.123	3.033
209674_at	CRY1	5.295	5.542	6.551	5.909	5.964	6.537	5.749	5.892	5.843	6.486	6.238	4.204	5.605	5.323	5.918	5.779	5.573	6.489	5.816	5.945	5.33	5.817	5.628	5.166	4.935	6.189	5.865	5.372	5.871	4.701	4.968	6.034	5.709	5.854	6.521	6.37	6.185	6.182	6.687	5.946	5.163	7.217	5.012	4.999	6.518	5.953	6.45	5.817
202950_at	CRYZ	4.231	4.854	5.544	5.977	5.782	7.112	5.441	5.742	5.142	6.465	7.109	3.803	5.586	5.353	5.988	6.606	5.612	6.338	5.403	5.454	5.794	5.948	5.527	4.658	5.702	6.791	5.896	5.165	5.481	5.727	5.431	5.669	5.667	5.812	6.82	6.517	6.836	5.536	6.977	6.715	5.243	7.069	5.048	5.321	6.496	6.736	6.193	5.216
1569387_at	CSGALNACT1	5.858	5.262	4.972	4.928	4.708	5.204	4.359	5.934	5.01	4.288	5.087	5.174	5.016	4.729	4.805	5.195	4.446	4.414	4.653	4.702	4.959	4.841	5.499	5.26	4.677	6.065	4.667	5.675	4.707	5.623	6.095	4.621	5.871	4.154	3.332	4.725	5.317	4.204	4.464	4.701	5.154	5.252	5.325	5.043	5.64	4.377	4.36	4.435
219049_at	CSGALNACT1	7.21	7.5	7.141	7.295	7.365	8.207	5.935	7.804	7.589	7.468	7.58	6.392	7.061	6.663	7.294	7.19	6.386	7.236	7.226	6.885	7.202	7.495	7.225	6.486	6.475	7.656	7.606	8.093	6.848	5.417	6.846	7.107	6.397	6.676	6.291	7.405	8.419	7.528	7.623	7.169	5.844	7.954	5.788	7.126	8.395	7.505	6.962	7.745
1556006_s_at	CSNK1A1	5.486	5.534	5.722	6.057	4.897	6.129	5.147	6.112	5.632	6.26	5.743	4.459	5.597	4.953	5.932	5.841	5.706	6.028	6.153	5.065	5.393	4.886	5.173	4.856	5.157	6.218	6.261	5.506	5.553	4.046	5.041	5.502	4.482	5.838	5.988	4.976	5.636	5.882	6.112	5.171	5.014	6.012	4.408	4.814	5.556	5.748	5.176	5.451
205764_at	CSNK1A1	1.886	2.247	1.873	1.782	2.095	1.874	2.482	2.035	2.242	2.009	2.122	2.226	2.144	1.919	2.053	1.973	1.833	2.016	1.982	2.03	1.689	2.556	1.99	2.642	1.808	1.713	2.147	2.069	1.955	2.354	2.034	2.022	2.069	1.565	2.128	2.114	1.979	2.316	1.946	1.782	2.08	2.053	1.973	1.851	2.148	2.181	2.17	2.178
226920_at	CSNK1A1	3.179	3.269	2.87	2.903	3.107	2.795	2.924	3.101	3.091	3.045	2.957	3.992	2.754	3.335	3.192	3.195	2.72	3.378	2.542	2.635	3.582	2.837	3.498	3.187	3.161	3.167	2.57	2.631	2.475	3.895	3.244	3.19	3.363	3.225	3.046	3.494	3.455	3.157	2.68	3.253	2.989	3.246	3.556	3.935	3.043	3.656	3.021	2.888
235464_at	CSNK1A1	3.552	3.831	3.717	4.036	2.567	3.475	3.806	4.284	3.765	4.389	4.046	3.458	3.217	3.568	3.276	4.05	3.053	4.085	3.885	3.453	3.341	3.197	3.272	3.313	4.012	3.679	4.06	3.309	3.599	3.798	3.16	3.576	3.528	3.97	3.982	3.157	3.71	3.62	3.866	3.497	3.645	4.138	3.048	3.129	3.499	4.156	3.344	3.775
221673_s_at	CSNK1G1	4.585	4.26	4.207	4.694	3.325	3.586	3.955	5.108	4.186	4.071	3.719	4.474	4.489	4.828	3.928	4.691	4.405	4.496	4.592	4.115	4.03	3.706	4.03	4.273	5.338	4.343	3.959	4.416	4.004	4.201	4.123	3.329	4.834	5.166	4.23	3.236	4.356	3.238	4.383	3.417	4.671	3.249	4.427	4.299	3.735	4.161	2.964	4.005
229216_s_at	CSNK2A1	2.503	2.259	2.332	2.475	2.206	2.111	2.382	2.901	2.683	2.395	2.354	3.082	2.48	2.198	2.289	2.389	2.522	2.326	2.446	2.577	2.203	2.495	2.655	2.31	2.194	2.691	2.329	2.069	2.537	2.557	2.48	2.461	2.437	2.031	2.636	2.264	2.388	2.302	2.252	2.261	2.407	2.157	2.339	2.368	2.412	2.752	2.301	2.512
1554873_at	CSPP1	1.969	1.775	2.099	2.535	2.127	1.828	1.975	2.486	2.019	1.962	1.814	1.804	2.183	2.366	1.96	2.335	2.169	2.417	2.125	1.957	2.069	1.602	1.687	1.907	2.17	1.784	2.224	2.472	1.764	2.144	1.797	1.914	2.433	2.197	2.207	2.069	2.253	1.786	2.109	1.743	2.625	1.892	1.935	1.968	2.087	1.804	1.649	2.099
227105_at	CSPP1	3.187	4.467	5.165	5.111	4.475	5.229	4.736	5.418	4.9	5.246	4.837	2.641	4.73	4.202	5.011	4.684	4.343	5.034	5.119	4.346	4.213	4.717	4.808	3.723	4.145	5.191	5.005	3.966	4.853	4.052	4.413	5.121	4.574	4.431	5.884	5.019	5.455	5.038	5.38	5.046	3.768	6.109	3.752	3.96	5.175	5.186	5.648	4.584
242041_at	CSPP1	2.476	2.845	2.826	2.894	3.017	3.196	2.891	3.692	3.298	2.854	2.721	2.615	3.292	3.102	3.293	3.202	3.222	2.816	3.144	3.221	2.284	3.088	2.757	2.889	3.134	3.077	2.731	2.835	2.69	2.729	2.746	2.522	3.343	3.506	2.802	2.894	2.789	2.267	2.896	2.677	2.551	3.071	2.794	3.028	3.618	2.959	2.725	3.216
229666_s_at	CSTF3	3.838	4.625	3.674	4.704	4.708	5.368	4.431	5.128	4.679	4.488	3.587	3.395	4.491	4.181	4.708	4.406	3.936	4.463	4.601	4.574	3.675	4.299	4.81	4.096	4.409	4.259	4.682	4.84	4.278	3.729	4.418	4.371	4.369	4.342	4.589	4.159	4.365	4.609	4.458	3.926	4.183	4.613	4.123	4.19	3.899	4.833	4.6	4.248
1555106_a_at	CTDSPL2	2.398	2.162	2.754	2.41	1.868	2.588	1.997	2.496	2.08	2.213	2.117	2.155	2.033	2.468	2.241	2.285	2.233	2.463	2.457	2.299	2.329	2.142	1.969	2.195	2.307	2.283	2.032	1.825	2.118	1.851	1.798	2.178	2.1	2.158	2.559	2.401	2.441	1.996	2.63	1.999	2.349	1.828	2.007	2.429	2.252	2.361	2.188	1.804
223271_s_at	CTDSPL2	6.618	6.026	7.289	7.4	6.082	7.055	5.938	7.876	5.913	7.457	7.493	5.765	7.358	6.978	6.346	7.325	6.46	7.141	7.404	6.048	6.719	5.831	5.954	6.533	5.826	7.41	6.497	6.735	6.331	5.396	5.756	6.351	6.667	6.694	7.438	7.337	7.144	6.664	7.134	6.546	6.856	6.72	5.6	6.514	6.669	7.256	6.839	5.893
214450_at	CTSW	6.455	6.829	7.209	7.345	7.846	6.198	7.154	6.072	6.655	6.555	7.026	7.377	6.291	6.477	6.476	7.555	6.354	7.811	6.379	6.786	6.54	7.33	5.823	7.129	5.24	6.609	7.459	6.942	7.064	7.355	7.804	6.575	6.977	6.909	6.859	6.662	8.836	7.005	9.148	8.058	6.144	7.473	7.092	7.392	8.257	7.269	7.307	6.815
219468_s_at	CUEDC1	4.469	4.849	3.569	4.315	3.505	3.405	4.604	4.13	3.702	3.663	3.796	4.922	4.551	3.964	4.17	3.935	4.823	3.876	4.511	4.54	4.574	4.062	4.977	3.868	4.695	4.094	4.331	4.738	4.854	4.165	5.351	3.951	4.285	4.399	3.461	3.723	3.509	3.701	3.283	3.695	4.381	3.343	4.402	4.318	3.46	3.534	3.553	3.821
220275_at	CUZD1	3.598	3.727	3.927	3.547	3.748	4.371	4.377	3.702	4.083	3.618	4.21	3.558	3.687	4.131	4.432	4.087	4.39	4.778	3.659	3.34	3.303	4.252	3.919	3.384	3.805	4.092	4.164	4.017	4.006	3.693	4.14	3.849	3.248	3.487	4.684	4.652	4.715	4.416	4.681	3.956	4.139	4.713	4.13	4.101	4.253	4.464	4.517	3.416
207852_at	CXCL5	1.902	2.126	2.223	1.896	2.288	1.525	1.95	2.31	1.856	2.412	1.971	2.047	1.695	1.751	1.958	2.009	1.633	1.883	2.032	1.837	2.406	2.452	1.808	2.212	1.913	1.767	1.985	2.222	1.539	1.895	1.761	1.732	1.818	1.67	1.847	1.911	1.6	2.101	1.632	2.133	2.046	1.839	1.917	1.859	1.905	2.109	2.108	2.486
214974_x_at	CXCL5	4.556	6.258	7.23	7.468	7.985	6.336	6.82	7.4	7.13	8.385	6.03	5.731	5.406	6.818	6.405	6.169	5.659	7.253	7.65	3.37	7.871	7.305	6.82	7.813	4.842	3.842	6.454	7.178	6.426	6.161	3.999	7.237	6.052	4.452	6.026	7.246	6.101	7.673	5.853	7.977	7.009	7.117	5.401	6.438	8.077	7.912	6.804	7.633
215101_s_at	CXCL5	2.683	3.687	5.027	5.605	4.557	3.505	4.081	5.637	4.658	6.476	4.14	4.968	3.914	5.193	4.262	4.571	3.89	5.714	5.749	2.558	5.349	4.238	4.342	5.686	2.926	2.169	4.638	5.244	3.259	4.099	3.026	4.161	3.695	2.7	3.781	5.398	3.991	5.528	4.311	5.633	5.33	3.207	2.797	4.174	6.231	6.558	4.36	5.569
217119_s_at	CXCR3	4.753	4.013	4.599	4.034	4.14	4.466	4.651	4.278	3.91	4.151	4.078	4.632	4.102	3.963	4.416	4.498	3.222	4.823	4.31	4.156	4.209	3.972	4.181	4.471	4.019	4.452	4.705	4.109	4.594	4.979	4.585	4.239	4.189	3.964	4.56	4.641	5.284	4.066	5.875	4.972	4.788	4.775	4.318	4.248	4.597	4.477	4.212	4.771
206126_at	CXCR5	5.682	6	6.123	6.292	6.318	6.496	6.77	6.565	6.546	6.215	5.568	5.715	6.522	6.469	6.158	6.253	6.599	6.126	6.579	7.138	4.927	6.647	6.661	6.01	6.961	6.092	5.445	6.982	6.058	6.424	5.65	6.013	6.771	6.596	5.526	5.993	5.282	5.467	5.471	6.163	5.374	5.89	6.423	5.416	5.401	6.301	5.994	6.387
206974_at	CXCR6	5.13	5.646	5.98	5.39	5.594	6.319	5.71	5.35	5.272	5.882	5.291	4.359	4.336	4.826	6.864	5.465	5.45	6.059	5.624	4.297	5.696	5.091	5.403	4.538	5.397	4.941	6.2	4.591	5.627	4.882	4.271	4.842	5.373	4.771	7.307	5.635	5.85	4.319	5.075	6.367	5.894	5.917	5.186	4.55	5.854	5.591	5.403	4.619
211469_s_at	CXCR6	3.975	4.754	4.96	4.878	4.829	4.892	4.49	4.668	4.673	5.01	4.411	3.842	3.746	4.202	5.97	4.562	4.759	5.044	4.951	3.983	4.706	4.318	4.806	4.115	4.228	4.162	5.528	3.792	5.058	4.66	3.677	4.155	4.54	4.311	6.218	4.995	5.142	4.002	4.755	5.147	5.477	5.296	4.875	4.101	4.872	5.258	4.594	4.325
227382_at	CYB5B	3.484	3.342	3.982	3.706	3.571	3.775	3.96	3.912	3.653	3.557	4.397	2.971	3.635	2.907	3.628	3.727	3.595	3.896	3.658	3.434	3.188	3.148	3.409	3.082	3.549	4.002	3.563	3.562	3.727	3.49	3.266	3.772	3.182	3.765	4.125	4.262	4.494	3.76	4.043	3.931	3.311	4.404	3.441	3.501	3.841	3.982	4.006	3.148
238554_at	CYB5B	3.678	3.743	4.655	4.217	5.023	5.199	4.683	4.734	4.484	4.546	5.098	3.588	4.561	3.956	4.482	4.685	4.333	4.888	4.546	4.435	4.547	4.762	4	4.044	4.702	4.814	4.08	3.853	4.18	4.329	4.028	4.746	3.557	4.467	5.247	4.844	5.204	4.322	4.922	4.73	4.248	5.381	4.283	5.027	5.186	4.874	5.143	4.413
229415_at	CYCS	3.637	4.338	4.267	4.568	4.328	5	4.86	4.915	4.508	4.422	4.585	3.365	4.635	3.893	4.515	4.41	4.488	4.702	3.943	4.292	4.49	4.452	4.47	3.398	3.912	4.764	4.515	3.781	4.044	4.254	4.142	4.227	4.046	4.299	4.268	4.296	4.393	4.341	4.47	4.599	3.631	5.183	4.08	3.765	4.824	4.637	4.479	4.418
244546_at	CYCS	4.102	4.221	4.743	5.081	3.822	4.203	4.948	5.883	3.863	4.585	4.494	3.849	5.029	5.027	4.262	5.405	4.473	4.526	4.896	4.267	4.907	3.317	4.294	3.638	5.953	5.714	4.457	4.77	3.868	4.583	4.482	4.987	5.608	5.225	4.575	3.735	4.292	2.718	4.619	4.178	4.117	3.907	3.254	3.833	4.046	4.778	3.105	4.605
1561894_at	CYREN	2.649	2.622	2.702	2.666	2.669	3.046	2.781	3.083	2.652	2.617	2.745	2.325	2.737	2.992	2.714	2.696	2.806	2.699	2.945	2.297	2.403	2.849	2.711	2.48	2.701	3.112	2.9	2.645	2.706	2.54	2.893	2.573	2.77	2.909	3.792	2.897	2.784	2.771	3.712	3.249	2.499	3.206	2.601	2.574	3.553	2.977	2.815	2.715
243752_s_at	CYTH3	2.035	2.018	2.395	2.366	2.078	2.274	2.21	1.761	2.068	1.938	1.939	2.254	2.006	1.922	2.191	1.834	2.651	2.445	2.116	2.18	2.46	2.478	2.032	2.127	1.8	2.116	1.859	2.06	1.951	2.388	2.157	1.929	1.938	2.266	1.887	2.514	2.095	1.987	2.133	2.151	2.157	1.887	2.137	2.041	1.787	2.236	1.928	2.363
1559370_at	DAB2	2.033	1.932	1.785	1.694	2.003	1.634	1.723	1.882	1.961	1.596	1.852	1.993	1.702	2.032	1.624	1.905	1.98	1.895	1.615	2.069	1.996	2.077	1.798	1.838	2.048	1.677	1.98	1.96	1.738	2.003	2.001	1.882	2.235	1.602	1.966	1.805	1.838	2.012	1.566	1.979	1.768	1.628	2.132	1.794	1.979	1.848	1.798	1.917
201280_s_at	DAB2	4.993	6.176	7.051	5.864	6.914	4.883	6.583	5.992	6.596	5.353	5.653	5.892	6.174	5.716	5.457	6.611	5.603	6.184	5.803	6.561	6.922	6.052	6.216	5.714	5.859	5.056	5.976	6.477	6.042	5.791	6.019	6.4	6.063	5.792	4.917	6.034	6.146	5.171	4.648	6.096	5.751	5.143	6.537	6.229	6.606	4.794	6.174	5.316
232898_at	DAB2	2.754	2.503	3.37	3.005	2.738	2.404	2.351	2.93	2.69	3.078	2.55	2.422	3.409	2.961	2.426	3.114	3.304	3.887	3.479	3.171	2.856	2.181	2.666	3.788	2.642	2.508	2.428	2.342	2.457	3.059	2.381	2.112	3.045	3.147	2.311	2.714	2.582	2.814	2.794	2.634	2.714	2.553	3.108	2.943	2.499	2.654	2.518	2.645
205471_s_at	DACH1	3.753	4.749	3.696	4.461	4.044	4.115	5.271	4.225	4.14	3.253	4.069	4.412	3.964	3.57	3.545	3.541	3.894	3.899	4.066	4.17	3.955	4	4.185	3.594	4.233	4.473	4.263	3.583	4.605	3.507	3.508	4.06	4.271	4.849	3.293	4.21	3.48	3.461	3.081	3.3	3.939	2.938	3.818	3.589	3.623	2.84	3.437	4.238
205472_s_at	DACH1	3.391	3.9	3.174	4.339	3.049	2.901	4.198	4.389	3.033	3.037	4.232	3.763	3.849	3.186	2.145	3.06	3.029	3.108	3.847	3.53	3.572	3.07	2.91	3.174	3.097	3.965	3.596	3.079	3.511	2.668	2.724	2.932	3.755	3.601	3.028	3.201	2.64	2.244	2.414	2.683	3.565	2.213	2.628	2.777	3.778	3.066	2.487	3.112
228915_at	DACH1	3.455	4.015	3.616	3.75	4.304	5.489	4.615	4.064	3.395	3.773	5.09	3.567	3.739	3	3.512	3.745	3.646	3.755	4.343	3.968	4.056	3.75	3.76	3.057	3.859	5.195	4.363	3.551	4.072	3.676	3.38	4.345	3.091	4.047	3.494	4.463	3.606	3.947	3.091	4.034	3.496	3.996	2.969	3.302	4.116	3.552	3.997	3.775
225833_at	DAGLB	4.922	4.976	4.377	4.411	4.318	4.275	4.631	4.678	4.788	4.528	4.008	4.5	4.758	4.8	5.211	4.297	4.236	4.635	4.567	4.067	4.682	3.987	4.134	4.047	4.855	4.516	4.959	4.937	5.293	4.11	5.226	4.179	4.783	5.173	3.362	4.577	4.922	3.668	4.871	3.75	4.271	3.877	4.879	4.819	4.226	4.366	3.41	4.423
239162_at	DAPK1-IT1	5.745	4.833	5.788	5.461	4.448	3.385	4.951	5.82	4.542	3.768	4.076	6.556	5.568	5.629	4.432	5.057	6.019	4.752	5.278	5.628	5.358	4.72	5.788	5.395	6.094	5.869	4.716	6.086	6.017	5.606	6.541	6.12	4.976	5.207	4.452	4.248	4.843	4.231	3.958	4.396	5.651	4.106	4.842	5.134	4.702	3.735	3.76	4.811
206324_s_at	DAPK2	7.662	6.837	5.829	6.758	6.088	6.08	7.24	5.509	6.403	5.724	5.856	7.549	6.594	5.974	6.51	5.836	7.162	5.787	6.783	6.956	7.152	6.138	6.314	5.91	6.684	5.851	6.439	6.695	7.466	5.613	6.287	6.756	6.928	6.377	5.517	5.858	5.576	5.251	5.345	5.917	6.077	5.647	6.298	5.857	5.854	5.238	5.156	6.019
215184_at	DAPK2	7.337	6.167	5.382	6.252	6.294	6.353	7.497	5.775	6.312	5.074	5.809	7.526	6.504	5.707	5.919	5.336	7.363	5.315	6.578	6.423	6.464	6.253	6.598	5.713	6.459	6.257	6.237	6.19	6.925	4.966	6.549	6.879	6.161	6.537	5.221	5.818	5.35	5.382	5.172	5.389	6.263	5.316	6.37	5.805	5.957	4.985	5.312	5.964
222858_s_at	DAPP1	8.854	8.864	8.859	9.658	8.122	7.522	7.989	9.412	7.908	8.684	9.65	9.536	9.588	9.065	7.342	9.346	7.847	8.896	9.293	7.461	9.236	7.456	7.782	8.725	8.685	9.164	8.838	8.808	8.441	8.341	6.619	8.37	9.016	8.74	8.589	9.034	8.553	7.722	8.865	6.753	9.629	5.986	5.966	9.612	8.976	8.83	6.811	8.836
236707_at	DAPP1	5.572	5.673	4.278	6.577	4.414	4.57	5.111	6.472	4.703	4.781	5.75	6.485	6.259	5.949	3.983	5.447	5.1	5.948	5.94	4.798	5.751	4.234	4.169	5.3	6.839	4.872	5.393	5.494	4.548	5.728	4.333	4.399	5.346	6.257	5.504	4.658	4.901	3.983	5.05	4.005	6.059	3.943	4.268	5.379	4.64	4.596	4.272	5.555
202428_x_at	DBI	5.915	6.171	6.197	6.198	6.871	9.129	6.775	5.996	6.25	7.503	8.061	6.178	6.815	6.137	7.182	7.208	7.017	6.944	6.82	7.439	8.112	7.287	6.709	6.434	8.258	8.119	6.774	6.577	6.258	7.467	6.566	7.048	6.228	6.423	8.331	6.583	7.296	7.587	7.884	8.085	6.474	8.292	6.586	7.53	6.665	8.293	8.374	6.872
209389_x_at	DBI	5.199	5.504	5.314	5.769	6.104	8.748	5.866	5.149	5.601	6.866	7.71	5.655	6.174	5.249	6.578	6.488	6.337	6.264	6.126	6.251	7.505	6.609	5.919	5.857	7.606	7.561	6.11	6.408	5.553	6.866	6.161	6.347	5.572	5.749	7.751	6.196	6.804	7.329	7.509	7.633	5.786	7.783	6.035	6.902	5.668	7.819	7.922	6.301
211070_x_at	DBI	5.135	5.566	5.418	5.755	6.024	8.649	6.19	5.131	5.449	7.119	7.608	5.761	6.243	5.197	6.707	6.528	6.367	6.379	6.052	6.789	7.48	6.47	5.945	5.917	7.667	7.636	6.145	6.019	5.705	6.586	6.083	6.627	5.21	5.737	7.836	5.874	6.912	7.264	7.367	7.604	5.984	7.852	6.052	6.939	6.261	7.887	7.918	6.417
205369_x_at	DBT	3.119	3.21	3.739	3.492	3.111	3.382	2.879	3.545	3.186	3.194	3.684	3.381	3.188	3.491	3.236	3.619	3.026	3.723	3.035	3.092	2.837	3.088	2.991	3.522	2.579	3.61	3.113	3.45	2.9	2.993	2.905	3.2	3.192	3.07	3.345	3.323	3.568	2.778	3.59	3.236	3.224	3.275	2.667	3.504	3.079	3.608	2.857	3.055
205371_s_at	DBT	3.046	3.12	3.329	3.208	2.781	2.999	2.478	3.685	2.732	4.174	3.199	2.302	3.188	3.206	3.31	3.225	2.556	3.784	3.318	2.117	2.588	2.664	3.041	2.884	2.696	3.697	3.17	3.314	2.981	2.253	2.125	2.919	3.084	2.851	3.539	2.734	3.349	2.464	3.562	2.582	2.981	2.837	2.331	2.938	2.494	3.508	2.842	2.588
211196_at	DBT	2.205	2.276	2.199	2.112	2.233	1.865	2.032	1.876	2.267	1.761	1.833	1.909	1.833	2	1.958	2.245	1.857	1.989	2	2.203	1.859	1.813	1.834	2.039	1.888	1.881	1.948	2.299	1.93	2.216	1.799	2.382	1.945	2.012	1.85	1.995	2.19	2.124	1.705	2.017	1.727	1.948	2.03	2.077	2.532	1.996	2.015	2.245
231919_at	DBT	3.132	3.373	4.037	3.478	3.869	4.182	3.784	3.71	3.452	3.56	3.757	2.463	3.611	2.905	3.635	3.293	3.435	3.653	3.595	3.065	3.244	3.268	3.491	2.857	3.401	3.994	3.476	3.067	3.619	2.879	2.999	3.679	3.272	3.629	3.605	2.711	3.574	2.713	3.862	3.236	2.53	4.16	2.794	2.782	3.135	3.302	3.744	3.458
220843_s_at	DCAF13	3.779	4.266	3.694	4.724	3.209	3.647	4.123	4.758	4.614	4.338	4.05	4.01	4.769	4.515	3.533	4.616	4.809	4.158	3.833	4.602	3.702	4.012	4.013	4.189	4.718	4.1	4.118	4.043	3.413	3.903	3.147	3.387	4.471	4.248	5.035	3.781	4.051	3.767	3.97	3.236	4.025	3.564	3.638	3.985	4.195	3.98	3.49	3.957
225676_s_at	DCAF13	3.62	4.389	4.693	4.799	4.654	6.313	4.312	4.866	4.707	5.944	5.726	3.348	4.86	4.482	5.427	5.468	4.96	5.42	5.189	4.99	5.504	5.14	4.92	3.65	5.339	6.119	5.058	4.876	4.455	5.254	4.615	4.998	4.396	4.745	6.569	5.263	5.639	5.609	6.222	5.892	4.271	6.316	4.476	4.982	5.202	5.814	6.025	5.065
231784_s_at	DCAF13	3.014	3.063	3.284	3.451	3.717	5.184	3.293	3.508	3.483	4.607	4.525	2.747	3.739	3.193	3.783	3.848	3.275	3.88	3.037	3.415	3.929	3.827	3.751	3.156	3.908	4.323	3.639	3.471	3.38	3.79	3.365	3.839	2.938	3.47	5.289	3.917	4.241	4.355	4.448	4.587	3.334	5.056	3.42	3.992	3.823	4.111	4.835	3.399
221849_s_at	DCAF15	3.359	3.433	3.604	3.709	3.644	3.657	3.716	2.914	3.4	3.725	3.39	3.756	3.639	3.675	3.221	3.167	3.485	3.85	3.712	2.888	3.278	2.928	3.136	3.358	3.094	3.161	3.629	3.314	3.957	3.779	4.7	3.276	3.217	3.65	3.092	3.817	3.954	3.696	4.405	3.923	3.331	3.598	3.751	3.098	3.834	3.208	3.412	3.254
221851_at	DCAF15	2.54	2.617	2.502	2.395	2.509	2.382	3.009	2.565	2.571	2.226	3.171	2.824	2.43	3.04	2.722	2.543	2.582	3.01	2.612	2.547	2.875	2.752	2.903	3.027	2.459	2.582	2.659	2.849	2.836	2.798	2.999	2.236	2.394	2.333	2.603	2.849	3.01	2.777	2.751	2.886	2.828	2.783	2.795	2.586	2.85	2.672	2.547	2.369
220172_at	DCAF17	1.971	2.092	2.194	2.292	2.32	2.83	2.557	2.32	2.07	2.551	2.393	2.405	2.376	1.86	2.283	2.127	1.93	2.479	2.446	1.934	2.445	2.345	2.149	2.337	2.134	2.578	2.337	1.91	2.359	2.071	2.017	2.154	2.39	1.95	2.595	2.44	2.912	2.985	2.672	2.277	2.207	3.583	2.191	2.042	2.3	2.557	2.655	2.489
231921_at	DCAF17	4.367	5.042	4.771	5.154	5.819	6.043	5.25	5.32	5.079	5.591	5.83	4.361	5.469	4.51	5.445	5.247	5.151	5.678	4.948	5.296	4.911	5.585	5.378	4.886	4.955	5.237	5.475	5.419	5.102	5.23	5.584	4.868	4.744	4.827	5.569	5.759	6.299	5.879	6.232	6.462	4.553	6.446	5.224	3.913	5.673	5.55	6.24	5.209
1554558_at	DCAF5	1.835	1.944	1.964	2.249	1.772	1.96	2.23	2.009	2.131	2.048	2.103	2.059	1.734	1.8	2.113	1.866	1.787	1.807	2.042	1.665	2.071	1.699	2.043	2.063	1.843	2.136	1.798	2.151	2.327	1.918	2.071	2.776	1.756	1.834	2.196	2.225	2.441	2.905	2.507	1.592	1.941	2.462	1.856	2.244	1.813	1.927	2.392	1.608
224697_at	DCAF5	3.777	3.381	3.552	3.681	3.535	3.811	3.369	3.69	3.476	3.353	3.078	3.753	3.48	3.365	3.794	3.441	4.209	3.779	3.234	3.435	3.112	3.564	3.435	3.411	3.419	2.877	3.188	3.487	3.567	3.06	4.101	3.846	3.323	3.893	3.629	4.073	4.742	4.236	3.593	4.008	3.628	4.685	4.027	3.261	4.285	4.09	3.718	3.492
1554049_s_at	DCAF8	3.074	2.886	3.661	3.822	4.249	3.461	3.582	3.885	3.707	3.985	3.707	3.629	3.703	3.799	3.994	3.718	3.61	3.959	3.715	3.675	3.235	3.257	3.912	3.71	3.525	3.623	3.577	2.979	3.658	3.465	3.887	3.457	3.38	3.073	4.463	3.936	4.221	4.146	3.777	4.1	4.102	4.357	3.885	3.757	4.06	3.894	4.209	4.126
232339_at	DCAF8	1.982	1.817	1.955	2.141	1.971	2.125	2.028	1.91	2.094	2.204	2.168	2.295	2.161	2.263	2.056	1.976	2.231	1.926	2.16	2.319	1.86	2.423	2.157	2.056	2.179	2.562	2.055	2.042	2.086	1.87	2.062	2.035	2.166	1.936	1.988	1.994	2.179	2.145	2.326	1.781	2.13	2.181	2.175	2.109	2.247	2.094	2.262	1.715
233637_at	DCAF8	6.039	4	5.827	4.757	4.635	4.293	5.248	5.403	4.476	4.724	4.252	4.645	5.192	5.238	4.669	4.74	5.63	4.369	4.993	5.059	4.428	4.403	4.59	4.573	5.323	5.718	4.383	5.343	5.204	5.781	5.612	4.635	6.046	4.832	4.137	4.539	4.796	4.259	4.595	4.666	5.217	5.324	5.006	4.225	5.568	4.666	4.311	4.226
238338_at	DCAF8	2.832	2.644	2.727	2.328	2.795	2.013	2.529	2.299	2.678	2.226	3.04	2.959	2.255	2.449	2.522	2.341	2.623	2.601	2.542	2.549	2.507	2.751	2.669	2.817	2.406	2.335	2.688	2.721	2.551	3.174	2.987	2.423	2.325	2.633	2.496	2.976	3.101	3.06	2.819	2.982	2.896	2.598	2.91	2.814	2.598	2.813	2.694	2.794
1553768_a_at	DCBLD1	2.584	2.505	2.133	2.703	2.292	2.222	1.904	3.295	2.2	2.666	2.362	2.638	2.588	2.366	2.24	2.057	2.146	2.329	2.546	2.199	2.79	2.23	2.314	2.274	2.249	2.68	2.53	1.961	2.245	2.151	2.083	2.663	2.613	2.562	1.99	2.301	2.232	2.374	2.275	2.26	2.287	2.048	2.381	2.016	2.28	1.95	1.695	2.126
226609_at	DCBLD1	3.208	3.261	3.196	3.622	3.286	4.466	2.931	4.469	2.98	3.831	3.369	2.787	3.372	3	3.839	3.336	3.01	4.391	3.537	3.173	3.115	3.739	3.963	3.354	3.188	3.452	3.954	3.259	3.424	2.709	3.392	3.254	3.282	3.319	4.328	3.839	3.43	3.957	4.134	4.579	3.155	4.392	3.042	2.961	3.639	3.582	4.194	3.24
209804_at	DCLRE1A	3.427	3.19	3.736	3.771	3.228	3.972	3.572	3.37	3.205	3.995	4.03	3.104	3.454	3.236	4.188	3.699	3.384	4.049	3.266	3.76	3.514	4.02	3.354	3.386	3.352	3.919	3.231	3.749	2.833	3.795	3.223	3.514	3.302	3.407	5.24	4.169	4.695	4.026	5.019	4.211	3.77	4.856	3.316	3.787	4.173	4.153	4.535	4.111
238779_at	DCP2	2.379	2.343	2.506	2.445	2.888	2.221	2.835	2.132	2.531	2.154	2.681	2.002	2.127	2.329	2.239	2.483	2.751	2.288	2.417	2.008	2.216	2.227	2.163	2.747	1.982	2.175	1.998	1.817	2.052	2.749	2.493	2.451	2.366	2.336	2.688	2.787	2.525	2.731	2.198	2.087	2.263	2.25	2.523	2.688	2.416	2.397	2.342	2.584
244777_at	DCP2	8.435	8.131	8.049	5.237	7.892	7.516	7.835	7.336	8.281	7.871	7.895	8.315	8.543	7.585	7.537	8.081	7.728	7.775	8.395	6.839	8.209	7.298	7.851	7.24	8.187	8.448	8.282	8.177	8.465	8.185	7.779	8.584	7.72	7.435	7.801	7.205	6.718	7.9	6.193	6.812	6.738	5.805	7.031	8.15	6.976	7.511	7.928	8.196
218583_s_at	DCUN1D1	5.901	5.951	6.623	6.765	7.647	7.844	6.656	6.433	6.462	7.473	7.833	6.73	6.686	6.532	6.66	6.858	6.944	6.773	6.919	6.778	7.272	6.851	6.273	6.391	6.584	7.305	6.8	6.65	6.604	6.388	5.896	7.178	5.408	6.449	7.736	7.178	7.574	7.575	7.219	7.273	6.066	7.591	5.46	8.172	7.001	8.182	8.202	7.516
222678_s_at	DCUN1D1	4.165	5.232	5.755	4.964	6.524	5.331	5.422	4.981	6.447	5.791	5.752	6.543	4.849	5.994	4.766	6.101	5.936	5.31	5.073	4.961	6.121	5.653	5.625	5.494	5.213	4.594	5.846	5.17	4.628	4.655	4.234	4.818	4.224	4.049	5.893	5.535	5.805	6.276	5.852	5.387	5.136	4.549	4.536	7.533	5.105	7.402	7.383	7.338
222679_s_at	DCUN1D1	4.572	6.987	5.233	6.174	5.845	5.892	5.003	5.581	6.124	7.112	6.151	6.664	5.725	7.756	4.819	7.539	6.261	6.111	6.355	5.721	7.121	4.781	5.285	6.269	7.3	5.66	6.603	6.517	5.484	4.847	3.781	5.35	4.616	6.007	7.155	5.473	6.173	5.504	5.722	4.77	5.71	5.331	4.03	7.257	5.48	6.809	5.907	6.706
238879_at	DCUN1D1	3.814	3.807	4.368	4.645	4.51	5.592	4.532	4.278	3.37	5.114	5.339	3.951	4.329	3.723	4.564	4.534	4.758	4.704	4.549	3.926	4.885	4.55	4.07	3.693	4.2	5.242	4.775	4.513	4.635	3.983	4.077	4.818	3.343	4.326	5.596	4.605	4.871	5.314	5.397	4.433	3.205	5.345	3.196	4.002	4.715	4.888	5.09	4.437
240781_x_at	DCUN1D1	1.694	1.858	2.075	2.26	1.891	2.135	1.895	1.776	1.943	2.146	2.028	1.53	1.975	1.688	1.861	2.023	1.565	1.808	2.112	2.322	1.999	2.202	1.815	1.804	1.906	2.442	1.603	1.962	2.37	1.48	1.988	1.969	1.883	2.133	2.333	2.025	1.944	2.067	1.806	1.775	1.873	2.31	1.495	2.331	2.035	2.25	2.353	2.295
212851_at	DCUN1D4	3.367	4.118	3.977	3.763	3.892	5.282	4.097	3.944	4.081	4.848	4.757	3.399	3.746	3.663	4.357	4.473	3.999	4.242	4.482	3.684	4.45	4.636	3.948	3.461	4.449	5.026	4.556	4.038	3.658	3.944	4.154	4.237	3.636	3.545	5.011	4.715	4.856	4.931	4.801	4.713	3.628	5.608	3.511	4.341	4.205	5.216	5.043	3.928
212855_at	DCUN1D4	3.894	4.739	5.238	4.976	5.357	6.544	4.809	5.203	5.123	6.246	6.046	3.546	5.182	4.906	5.514	5.3	5.249	5.388	5.498	4.943	5.259	4.954	4.933	4.38	5.254	5.983	4.925	5.068	4.364	4.335	4.317	5.501	3.99	5.338	6.06	5.305	5.569	5.389	5.996	5.514	4.28	6.389	3.63	4.962	5.228	5.809	6.184	5.448
218260_at	DDA1	4.106	4.474	4.3	4.245	4.232	4.136	4.884	4.218	4.158	3.971	4.213	4.302	4.422	3.837	4.184	4.111	4.072	4.484	3.953	4.271	4.407	3.934	4.112	4.665	3.509	4.053	4.836	4.448	4.488	4.325	5.051	4.074	3.452	4.262	3.837	4.339	5.156	4.68	5.76	5.114	4.621	4.374	4.168	4.384	4.716	3.876	4.759	4.062
228281_at	DDIAS	3.868	4.318	4.045	4.576	4.113	4.834	3.736	4.339	4.225	4.781	4.761	4.616	4.928	3.947	4.726	4.142	5.194	4.206	4.517	4.332	4.339	4.541	4.223	4.187	4.558	4.52	4.067	4.105	4.418	4.238	4.545	4.658	4.293	4.421	5.206	4.758	3.946	6.083	5.509	4.843	4.516	4.644	4.064	4.727	4.606	4.493	5.101	4.565
1563522_at	DDX10	1.992	2.452	1.891	2.083	1.883	2.176	1.883	1.918	1.922	1.918	2.413	2.431	2.233	1.84	1.982	2.13	1.756	1.828	1.979	1.73	1.935	1.917	2.016	1.995	1.958	1.89	2.118	1.974	1.692	2.144	2.057	2.191	2.093	2.12	2.279	2.298	1.838	1.851	2.137	2.056	2.013	2.258	2.076	2.059	1.866	1.862	1.771	1.818
208151_x_at	DDX17	5.618	4.617	6.607	6.542	3.957	7.174	4.316	4.56	3.673	4.31	4.104	6.353	4.551	4.479	5.285	5.537	5.588	5.743	7.687	5.504	5.46	5.27	3.703	7.268	3.781	3.448	3.684	4.2	6.064	6.909	7.734	4.07	5.414	5.436	3.961	6.718	7.149	5.348	4.262	7.311	5.802	4.083	4.076	4.12	6.805	4.47	5.14	5.47
208719_s_at	DDX17	5.562	4.007	6.071	6.169	3.683	6.376	4.151	3.654	2.934	3.788	3.244	6.083	3.994	3.547	4.252	4.989	4.658	5.567	7.264	4.734	4.753	4.354	3.088	6.28	3.477	2.956	3.61	3.63	5.422	5.723	7.289	3.483	5.063	4.813	3.128	6.449	7.259	4.85	4.167	6.752	4.95	3.675	3.23	3.267	6.539	3.984	4.298	4.214
213998_s_at	DDX17	8.533	7.645	8.188	9.559	7.244	6.847	7.413	9.507	7.345	7.813	8.081	9.01	8.989	9.906	6.04	9.465	7.722	9.802	9.453	7.344	7.996	6.336	6.932	9.229	8.737	8.541	7.713	8.479	6.929	8.211	6.556	6.126	9.714	8.901	8.516	7.576	9.009	5.595	9.132	5.906	8.86	6.052	5.942	8.453	7.636	8.243	6.271	8.207
230180_at	DDX17	9.957	10.289	9.372	10.917	10.74	8.349	9.522	10.683	9.828	9.887	9.633	10.326	10.623	10.888	8.626	10.336	9.091	10.521	9.984	9.576	9.982	8.662	10.034	10.334	10.704	9.878	9.322	10.156	8.957	10.447	8.591	8.498	10.757	10.214	9.843	8.93	10.019	6.723	9.865	7.021	10.289	7.246	8.018	10.285	8.885	9.682	7.761	9.455
203784_s_at	DDX28	3.683	3.2	3.682	3.467	3.378	2.57	3.575	3.036	3.21	3.827	4.166	3.596	3.215	3.739	3.116	3.625	2.905	3.423	3.094	3.063	2.699	3.136	2.968	3.648	3.176	2.601	3.573	3.532	3.431	4.073	3.668	3.538	2.768	3.464	3.22	3.974	3.473	3.795	3.688	3.416	4.515	3.494	3.608	4.008	3.384	3.676	3.266	3.635
207617_at	DDX3X	2.773	2.545	1.967	2.752	3.007	2.843	2.532	2.39	2.496	2.506	2.419	2.699	2.23	2.522	2.268	2.234	2.438	2.342	2.536	2.346	2.565	2.261	2.525	3.288	2.787	2.477	2.224	2.226	2.423	2.736	2.708	2.549	2.171	2.642	2.42	2.374	2.089	2.616	2.292	2.388	2.616	2.474	2.58	2.355	2.597	1.918	2.607	2.534
1570359_at	DDX3Y	1.608	1.84	1.642	1.664	1.791	1.557	1.557	1.732	2.004	1.856	2.041	1.91	1.407	1.8	1.704	1.649	1.959	1.758	1.764	1.556	1.829	1.659	1.804	1.597	1.728	1.798	1.684	1.571	1.789	1.624	1.486	1.65	1.704	1.675	1.692	1.678	1.779	1.566	1.784	1.782	1.749	1.612	1.696	1.741	1.86	1.78	1.733	1.651
1570360_s_at	DDX3Y	2.794	2.528	2.593	2.237	2.168	2.473	2.05	2.001	2.305	2.622	2.995	2.708	2.342	2.767	2.818	2.784	2.681	3.054	2.174	2.659	2.848	2.084	2.522	2.586	2.621	2.76	2.845	3.165	2.421	2.46	2.41	2.48	2.869	2.317	3.322	2.715	3.082	2.297	2.911	2.09	2.752	2.375	2.717	2.749	2.353	2.881	2.713	2.158
205000_at	DDX3Y	6.9	1.774	7.687	1.989	2.035	1.961	2.066	1.656	2.385	8.685	8.43	5.913	7.586	7.146	7.869	7.876	7.847	8.111	2.335	7.635	7.904	7.77	7.551	6.812	7.453	8.532	7.949	7.535	7.541	7.066	6.95	8.29	6.887	7.767	9.082	8.115	8.321	2.295	8.486	1.895	6.728	8.902	6.301	7.47	8.06	8.08	8.638	1.895
205001_s_at	DDX3Y	7.364	3.19	7.144	3.738	4.101	3.069	2.725	3.203	3.558	7.72	7.415	7.361	7.893	8.45	7.277	8.019	7.973	7.743	3.149	7.964	7.813	7.282	7.283	7.798	8.476	7.541	7.32	7.874	7.46	7.684	8.074	7.846	7.981	8.222	8.237	7.3	7.747	3.878	7.691	3.88	7.508	8.586	8.251	7.881	6.982	7.533	7.854	3.907
220004_at	DDX43	2.091	1.828	2.772	2.356	1.832	2.097	2.203	1.742	1.95	2.589	2.2	2.376	2.072	2.577	2.324	2.135	2.563	2.907	1.946	2.057	2.151	2.454	2.018	2.493	2.41	1.93	2.482	2.039	2.406	2.101	2.14	3.004	2.249	2.176	2.375	2.929	2.933	2.81	2.684	2.529	2.279	3.241	2.488	3.248	2.148	3.598	2.211	2.63
228386_s_at	DDX59	4.76	4.507	4.604	5.35	5.255	5.835	4.461	5.107	4.806	5.661	5.178	4.098	5.074	4.712	5.279	4.944	5.112	5.548	5.241	4.523	4.51	4.124	5.164	4.35	4.919	5.124	5.314	5.257	5.252	3.933	4.438	5.246	3.779	5.098	6.014	5.174	5.369	5.967	5.807	5.091	4.425	5.41	4.075	4.519	4.804	5.119	5.545	4.935
1559585_at	DDX60L	4.505	4.215	3.872	4.009	3.484	3.021	5.093	3.586	2.715	3.208	4.164	4.06	3.93	2.889	3.933	3.07	4.013	4.014	4.069	2.981	3.704	3.886	3.583	2.992	3.621	4.64	4.596	3.403	4.411	3.434	3.318	4.76	2.426	4.856	4.269	3.773	4.543	4.912	3.93	4.364	3.945	5.371	3.228	4.344	4.364	3.882	4.966	3.087
214787_at	DENND4A	4.052	4.297	5.447	5.126	4.629	5.717	4.598	5.432	4.766	5.746	5.187	2.686	4.401	4.493	4.721	4.989	4.675	5.206	5.373	4.571	4.411	4.628	4.374	3.165	4.398	5.688	4.953	4.622	4.499	3.871	3.702	5.149	4.447	5.153	6.156	4.966	5.617	4.669	5.618	4.831	4.196	5.671	3.429	3.808	5.482	4.765	5.302	4.956
215058_at	DENND5B	2.615	2.664	3.161	2.915	2.387	2.618	3.2	3.251	2.814	3.087	2.2	2.505	3.13	2.748	4.417	3.228	2.575	2.785	3.416	2.721	2.349	2.274	2.824	2.724	2.894	3.25	2.161	3.067	2.437	2.466	2.435	2.663	3.302	2.766	2.519	2.374	2.509	2.289	2.762	2.241	2.415	2.487	2.639	2.402	3.102	2.131	2.262	2.268
228551_at	DENND5B	4.4	4.235	4.517	3.972	4.516	5.042	4.282	4.845	4.357	5.537	4.869	3.819	4.24	4.145	6.515	5.188	4.931	4.401	4.901	4.55	4.154	4.513	4.981	3.992	4.664	4.722	4.104	4.294	4.491	4.249	3.14	4.458	4.306	5.192	4.722	4.425	4.701	4.463	5.531	5.323	4.167	4.472	4.347	4.174	4.815	4.617	4.689	4.486
236415_at	DENND5B	2.102	2.349	2.19	1.852	2.327	1.761	2.632	2.313	2.159	1.937	2.061	2.243	2.291	2.234	2.191	2.059	2.152	2.136	2.253	2.581	2.235	2.616	2.538	2.538	2.449	2.337	2.306	2.398	1.859	2.078	2.338	2.138	2.244	2.367	2.239	2.155	2.063	2.332	2.367	2.278	2.251	2.06	2.346	1.761	1.872	2.257	2.24	2.277
243613_at	DENND5B	1.725	1.943	1.761	1.565	1.714	1.783	1.504	2.122	1.842	1.765	1.922	2.034	1.924	1.845	2.056	1.836	1.81	1.869	1.613	1.84	1.782	1.727	1.846	1.685	1.838	1.737	1.998	1.991	1.658	1.587	1.705	1.666	1.896	1.871	1.727	1.811	1.949	1.753	1.972	1.977	1.839	1.694	1.644	1.611	1.828	1.781	1.734	1.875
226980_at	DEPDC1B	1.613	1.896	2.092	2.009	1.706	2.009	1.995	1.458	1.671	1.733	1.947	2.082	1.814	1.609	2.405	1.895	1.909	1.91	1.815	1.879	1.883	1.718	1.842	2.059	1.855	1.903	1.899	2.019	1.711	1.762	1.668	1.622	1.819	2.484	2.446	1.973	2.416	2.206	2.627	2.468	1.731	2.506	2.199	1.93	1.905	2.16	2.272	1.842
219875_s_at	DESI2	1.689	1.694	1.694	1.644	1.584	1.594	1.783	1.744	1.694	1.44	1.903	1.97	1.581	1.529	1.591	1.519	1.705	1.653	1.627	1.651	1.725	1.674	1.758	1.54	1.597	1.713	1.642	1.918	1.837	1.777	1.809	1.412	1.935	1.624	1.639	1.867	1.981	1.895	1.623	1.592	1.943	1.496	1.912	1.864	1.656	1.567	1.548	1.511
222936_s_at	DESI2	2.397	2.227	2.341	2.511	2.262	2.239	2.249	2.394	2.514	2.15	2.057	2.283	2.192	2.351	2.262	2.138	2.316	2.042	2.271	2.191	2.359	2.009	2.332	2.234	2.093	2.628	2.342	2.097	2.157	2.286	2.169	2.308	1.991	2.399	2.102	2.316	1.971	2.206	1.977	2.262	2.112	2.09	2.034	2.658	2.065	2.816	2.168	2.17
238194_at	DGKK	3.912	3.728	5.978	3.644	4.01	3.728	3.712	4.083	3.881	4.601	4.469	4.247	4.043	4.392	4.133	4.232	4.116	6.376	4.163	4.624	4.675	4.408	4.445	4.397	3.891	3.647	3.995	4.03	3.574	3.99	3.985	4.541	4.264	3.686	3.418	3.956	4.26	3.731	3.6	3.918	3.746	3.717	4.235	4.101	4.207	4.183	4.584	3.801
48808_at	DHFR	5.384	5.738	5.736	5.8	5.455	5.464	6.077	5.893	5.655	6.012	4.959	5.457	5.68	5.308	6.034	5.727	5.869	5.349	5.848	5.916	5.122	6.235	5.869	5.41	5.986	6.515	5.625	5.54	5.484	4.73	5.215	5.86	5.703	5.63	5.432	5.237	5.765	5.403	5.197	5.631	4.757	5.256	3.936	4.479	6.138	5.787	4.922	4.942
235675_at	DHFR2	3.26	3.23	3.693	4.343	3.587	4.802	3.749	3.847	3.638	4.258	3.778	2.392	3.83	3.29	4.132	4.149	3.449	3.787	3.604	3.488	3.287	3.616	3.292	2.764	3.706	3.642	3.749	3.773	3.626	2.633	3.035	3.936	3.636	3.629	5.047	3.788	4.173	4.539	4.309	3.625	3.366	4.65	2.553	2.979	4.116	3.76	4.197	3.516
227446_s_at	DHRS4-AS1	4.942	5.012	5.146	4.819	4.613	5.811	4.18	4.681	4.787	5.402	6.009	3.988	5.301	4.7	5.131	4.985	5.006	5.487	5.221	4.548	4.119	4.627	5.147	4.673	4.395	6.022	5.875	4.675	5.43	4.104	5.045	5.359	4.214	4.968	5.292	5.415	5.422	5.389	6.19	5.973	4.89	5.691	5.036	4.514	5.637	5.194	5.746	5.333
213868_s_at	DHRS7	4.676	4.21	4.202	4.401	4.068	4.549	3.971	3.979	4.078	4.481	3.474	4.378	4.538	4.026	4.65	3.94	4.823	3.496	4.115	3.62	3.77	4.15	4.516	3.165	4.387	4.137	4.05	3.455	4.369	3.689	3.436	4.857	3.459	4.379	4.003	3.485	2.733	3.841	3.255	3.539	4.09	3.937	3.386	4.44	3.564	5.207	3.466	4.2
236332_at	DHRS7	3.853	3.341	3.506	4.356	3.471	3.683	3.291	4.189	3.384	3.135	3.778	4.343	3.307	3.333	3.62	3.638	4.305	4.532	3.895	3.821	3.834	3.344	2.874	3.99	3.21	3.175	3.895	3.142	3.233	3.597	3.291	3.973	3.108	3.768	3.864	4.054	3.912	3.879	4.155	3.391	3.963	3.662	3.649	4.147	3.779	3.513	3.382	3.431
1561132_at	DHX35	1.872	2.121	2.212	2.072	1.813	1.728	2.355	2.192	2.241	1.775	2.159	2.249	1.992	2.37	1.848	1.828	2.183	1.927	2.135	1.938	2.017	2.254	2.003	2.384	1.822	2.226	2.149	2.069	2.011	2.363	1.93	2.255	2.181	1.855	2.12	2.412	2.014	1.938	1.862	2.272	2.342	2.07	2.041	2.015	2.08	2.151	1.985	2.141
234728_s_at	DHX35	2.675	2.18	2.409	2.396	2.267	2.213	2.572	2.635	2.359	2.223	2.553	2.671	2.048	2.322	2.734	2.197	2.263	2.213	2.168	2.222	2.338	2.267	2.244	2.183	2.298	2.511	2.372	2.247	1.997	2.111	2.172	1.879	2.327	2.275	2.275	2.558	2.658	2.472	2.657	2.405	2.179	2.547	2.403	2.312	2.653	2.799	2.331	1.908
212105_s_at	DHX9	3.557	4.118	3.557	3.891	3.022	3.202	2.932	3.837	3.559	4.281	3.89	3.802	3.283	4.924	2.703	4.352	3.148	5.559	4.068	3.436	3.976	2.888	2.832	3.481	4.413	3.772	4.222	3.571	2.869	3.448	2.916	2.649	3.238	3.918	4.099	2.892	4.564	2.518	5.676	2.364	4.083	2.269	2.351	4.831	2.942	4.221	2.275	3.466
212107_s_at	DHX9	5.781	7.777	6.357	6.839	5.547	4.846	6.03	7.138	6.265	7.637	7.103	6.927	6.119	7.077	5.324	6.735	5.606	8.706	6.751	5.75	6.945	5.753	5.725	6.671	7.52	6.034	7.144	7.466	5.198	7.154	4.965	5.091	6.638	7.309	7.458	5.59	7.187	4.458	8.359	4.062	7.102	4.979	4.364	7.662	6.023	7.468	5.295	7.162
1552677_a_at	DIP2A	5.031	4.885	5.211	5.777	4.43	4.514	4.879	5.593	4.697	4.85	4.536	4.652	4.923	6.193	4.939	5.84	5.113	5.956	5.142	4.893	4.727	4.424	4.629	4.835	4.953	5.536	4.515	4.669	5.032	4.497	3.84	4.407	4.987	5.413	5.4	4.868	5.533	4.277	4.658	3.938	5.244	4.502	4.664	4.385	4.93	5.28	4.188	4.69
1555301_a_at	DIP2A	4.214	4.864	4.849	4.917	4.852	4.447	5.295	4.863	4.902	4.505	3.802	4.735	4.451	5.076	5.061	5.546	4.491	5.435	4.342	4.467	4.257	5.205	4.777	5.002	5.097	4.3	4.241	4.079	5.084	4.413	4.316	5.366	4.745	4.765	5.075	4.788	4.592	4.335	3.515	4.534	4.762	5.464	5.68	4.37	4.918	5.076	5.263	4.505
1561286_a_at	DIP2A	4.322	4.466	5.055	4.981	4.782	4.666	5.133	4.672	4.168	4.5	3.778	5.045	3.976	5.208	4.929	5.235	4.356	5.216	4.607	4.51	4.581	5.201	4.945	5.043	4.789	4.393	4.201	4.287	4.445	4.368	3.438	5.105	4.67	5.118	5.366	4.838	4.603	4.196	3.955	4.472	4.515	5.404	5.073	4.275	4.902	4.892	4.633	4.122
1553271_at	DIP2B	4.462	3.628	3.931	4.119	3.584	3.522	4.209	3.743	3.481	3.889	3.803	3.243	3.999	3.547	3.447	3.682	4.002	3.183	3.908	3.428	3.188	3.415	3.633	3.319	3.753	4.874	3.504	3.425	4.097	3.479	3.562	3.456	3.779	3.963	2.606	2.728	3.181	3.533	2.692	3.084	3.346	3.962	3.928	3.444	3.487	2.859	3.282	3.503
242970_at	DIP2B	5.13	5.638	5.376	6.055	4.466	4.07	5.066	4.874	4.571	5.402	4.492	5.463	5.395	5.124	4.477	4.835	5.881	4.834	5.312	4.91	4.575	4.74	5.655	5.117	5.508	4.941	5.219	5.445	4.52	5.054	4.466	4.683	5.515	5.078	4.113	4.504	4.649	4.259	4.261	4.234	5.246	3.871	4.31	4.888	5.345	5.132	4.28	5.149
1564443_at	DLEU2	4.559	3.943	3.903	4.223	3.801	3.964	4.294	4.374	3.551	3.669	3.656	3.827	3.95	3.813	3.51	3.553	4.144	3.993	4.298	4.12	4.202	4.123	3.897	3.909	3.562	3.797	3.751	4.157	4.23	3.853	4.901	4.426	4.542	4.399	3.472	3.446	3.701	3.953	2.683	3.667	3.788	3.784	3.639	3.664	3.703	3.713	3.564	3.954
1569600_at	DLEU2	2.793	2.454	3.66	3.658	2.239	2.694	3.518	3.53	2.313	2.758	2.205	2.302	3.255	3.078	2.833	2.691	3.427	2.479	3.634	3.142	2.554	2.336	2.991	2.14	3.649	3.403	2.512	2.193	3.092	2.58	2.654	3.327	3.129	2.727	2.933	2.069	2.676	2.688	2.694	2.478	2.336	2.987	2.912	2.341	3.139	2.37	2.413	3.093
216870_x_at	DLEU2	3.681	3.645	4.68	3.812	3.663	4.634	4.128	4.104	3.361	4.865	4.39	3.678	4.125	3.955	3.866	4.422	4.595	4.324	4.537	3.934	3.853	3.606	3.61	3.476	3.416	5.103	4.395	3.819	3.9	3.638	3.504	4.195	3.763	4.083	5.014	4.402	4.446	4.278	4.411	4.502	3.623	5.176	3.427	3.992	4.377	4.236	4.5	3.851
242854_x_at	DLEU2	4.875	4.211	5.306	5.01	4.155	3.859	4.408	5.02	4.157	4.388	4.262	4.445	4.616	4.91	4.233	4.591	4.364	4.455	5.101	4.277	4.346	3.116	4.33	4.444	4.938	5.497	4.282	4.399	4.531	3.949	3.961	4.275	4.793	4.458	4.669	3.938	4.429	3.538	4.212	3.827	4.372	3.789	3.975	4.569	4.719	4.118	2.987	4.46
207732_s_at	DLG3	2.888	2.93	2.712	2.814	2.45	2.77	3.1	2.659	2.741	2.391	2.551	2.879	2.964	2.797	2.68	2.735	3.171	2.892	3.409	2.81	2.739	2.59	2.831	2.848	2.82	2.391	2.569	2.876	3.11	3.11	3.168	2.785	2.711	2.894	2.894	2.705	3.369	2.66	3.712	2.536	2.82	3.214	3.034	2.733	3.064	3.052	2.556	2.727
206993_at	DMAC2L	2.949	3.342	3.148	3.184	3.908	3.983	3.271	3.06	3.473	3.251	3.83	3.503	3.32	3.558	3.694	4.045	3.39	3.419	2.957	4.085	3.397	3.005	3.245	3.376	3.476	3.289	3.571	3.199	3.674	3.445	3.57	3.557	3.481	3.146	3.883	3.581	3.311	3.708	3.616	3.953	3.316	3.751	3.623	3.943	3.594	4.168	4.341	3.749
237400_at	DMAC2L	3.913	4.169	5.392	5.165	5.116	4.813	4.544	5.054	4.687	4.854	4.317	4.546	4.497	4.431	4.84	5.195	4.256	5.295	4.262	5.073	4.383	4.622	4.977	3.677	4.312	5.1	4.706	4.742	4.525	4.055	4.489	5.435	3.906	4.17	5.6	5.012	5.046	5.171	5.196	5.176	4.546	5.549	4.715	4.641	5.501	5.316	5.492	4.634
238799_at	DMAC2L	1.932	2.404	2.56	2.817	2.232	2.145	2.461	2.711	2.055	2.563	2.126	2.067	2.328	2.356	2.342	2.506	1.911	3.021	2.462	1.941	1.992	2.04	2.122	2.13	2.758	2.872	2.415	2.681	2.012	2.277	2.187	1.896	2.043	2.371	2.53	2.248	2.929	2.219	2.623	2.065	2.487	1.829	2.175	2.614	2.055	2.744	2.675	2.345
244670_at	DMAC2L	2.422	2.439	2.59	2.489	2.175	2.376	2.595	2.909	2.264	2.537	2.615	2.351	2.3	2.596	2.022	1.996	2.829	2.49	2.629	2.338	2.532	2.078	2.484	2.727	2.405	2.562	2.228	2.9	2.848	2.579	1.999	2.406	2.92	2.912	2.458	2.715	2.227	2.313	2.362	1.965	2.36	2.41	2.359	2.195	2.329	2.483	2.144	2.297
203791_at	DMXL1	5.814	6.266	6.965	6.55	6.136	7.149	5.907	6.559	5.908	6.813	6.802	4.304	6.259	5.602	6.361	6.247	6.189	6.287	6.847	6.361	6.06	6.268	6.145	5.53	6.027	7.059	6.296	6.277	6.342	5.719	5.256	6.8	5.692	6.524	7.415	6.79	6.7	6.862	7.018	6.713	5.815	7.09	4.918	5.573	7.116	6.432	7.033	6.467
215761_at	DMXL2	6.829	5.956	5.705	5.884	5.74	4.977	6.634	6.207	5.661	5.453	5.895	6.552	6.848	5.602	5.578	5.662	6.308	5.549	5.838	5.637	6.557	4.581	5.628	6.142	6.236	6.162	6.177	5.662	6.682	7.159	7.042	5.201	6.529	5.95	4.935	5.058	5.335	5.616	4.365	5.726	6.326	4.868	7.286	6.411	5.355	4.317	5.162	5.216
222621_at	DNAJC1	6.137	6.431	6.585	7.088	5.959	5.897	6.093	7.097	5.811	6.914	6.396	6.438	6.959	6.788	5.701	6.936	5.519	7.007	6.678	5.719	7.136	5.531	5.6	6.609	6.576	7.121	6.517	6.388	5.71	5.995	4.734	5.648	6.715	6.589	6.977	6.398	6.542	5.154	6.657	5.062	6.999	5.389	4.549	6.159	6.813	5.931	5.281	6.227
230893_at	DNAJC21	2.373	3.852	3.309	3.37	3.162	4.386	3.159	3.498	3.418	4.03	3.487	2.595	3.548	3.373	3.445	3.175	3.265	3.991	3.338	3.72	3.652	3.263	3.041	2.849	4.012	3.756	3.361	3.162	3.116	2.526	2.285	3.511	3.035	3.577	4.483	3.183	3.47	3.189	3.88	3.26	2.976	3.64	2.108	2.891	3.325	3.21	3.46	3.635
234094_x_at	DNAJC21	1.907	2.004	2.017	1.877	1.898	1.83	1.9	1.75	1.893	1.843	2.022	2.029	1.975	1.784	1.843	1.762	2.117	1.703	1.927	2.203	2.051	1.834	1.764	1.817	1.822	1.769	2.262	2.069	2.072	1.753	1.861	1.859	1.718	1.888	1.85	2.05	1.848	1.611	2.116	1.657	1.966	1.648	1.683	1.599	2.083	1.469	1.659	2.542
235032_at	DNAJC21	3.703	4.094	4.51	4.266	4.338	5.012	4.148	4.486	4.204	4.701	4.192	3.127	4.259	4.188	4.623	4.744	4.123	4.302	4.364	4.364	4.224	4.012	4.527	3.541	4.442	4.615	4.179	3.541	4.806	3.764	3.918	4.88	3.999	3.981	4.906	4.248	4.591	4.37	4.78	4.389	3.792	4.882	3.758	3.763	4.511	4.545	4.603	4.026
238335_at	DNAJC21	1.854	1.791	1.756	1.882	1.64	1.771	2.145	1.672	1.799	1.905	1.591	1.768	1.819	1.671	1.692	1.871	2.004	1.673	1.889	2.008	1.828	1.855	2.022	1.747	1.844	2.124	1.944	1.834	1.75	1.729	1.653	2.098	1.751	1.999	1.994	1.652	2.008	1.958	1.872	2.06	1.836	2.119	1.683	2.095	1.827	2.84	1.848	1.943
238336_s_at	DNAJC21	1.67	1.665	1.813	1.813	1.881	2.18	2.06	1.713	1.731	1.781	1.711	1.999	1.65	1.624	2.05	1.719	1.814	1.61	1.659	1.92	2.048	1.864	1.507	1.577	2.014	2.094	1.588	1.911	1.796	1.643	1.761	2.236	1.779	1.968	1.83	2.092	1.659	1.758	1.976	1.798	1.652	2.034	1.696	1.81	1.748	2.089	1.667	1.99
227859_at	DNAJC27	4.138	4.602	5.007	4.703	5.001	5.522	4.345	5.148	4.79	5.269	4.712	3.592	4.24	4.28	4.88	4.829	4.054	4.999	5.046	4.644	4.044	4.668	4.784	3.807	4.026	5.175	4.794	4.28	4.415	3.637	4.244	4.87	4.011	4.589	5.548	4.483	5.167	4.828	5.345	4.792	4.243	6.136	3.685	3.724	5.092	4.894	5.211	4.035
233368_s_at	DNAJC27	2.205	2.431	2.376	2.221	2.622	2.151	1.984	2.486	2.461	2.303	2.593	2.548	2.435	2.497	2.277	2.533	2.291	2.475	1.991	2.582	2.23	2.631	2.193	2.611	1.985	2.225	2.265	2.012	2.346	2.605	2.47	2.287	1.793	2.421	2.023	2.66	2.815	2.366	2.29	2.469	2.415	2.495	2.436	2.624	2.487	2.695	2.244	2.255
239194_at	DNAJC30	2.304	2.31	2.561	2.219	2.328	2.248	2.605	2.084	2.059	2.222	2.812	2.641	2.35	2.126	2.227	2.294	2.273	2.194	2.138	2.069	2.277	2.412	2.006	2.416	2.271	2.463	2.398	2.229	2.191	2.673	2.999	2.251	2.111	2.381	2.306	2.783	2.541	2.518	2.655	2.357	2.887	2.304	2.729	2.132	2.684	2.507	2.813	2.388
205554_s_at	DNASE1L3	3.005	4.48	3.734	2.889	3.951	3.609	3.506	3.72	3.671	4.015	3.186	3.455	3.354	3.911	4.282	3.65	4.331	3.154	3.948	3.48	4.909	3.652	4.61	3.769	3.814	3.939	3.259	3.736	3.424	3.378	3.581	4.189	3.789	3.637	2.996	3.298	3.328	3.394	3.075	3.457	2.974	3.477	3.618	3.243	3.29	3.537	3.93	3.104
203105_s_at	DNM1L	4.438	4.936	5.265	4.624	4.882	5.512	4.819	5.321	4.665	5.353	5.069	4.145	4.501	4.828	5.512	5.278	4.745	5.169	5.448	4.999	5.413	4.841	4.559	4.277	4.803	4.907	5.217	4.657	4.819	4.143	4.128	4.797	4.366	5.056	5.61	5.209	5.512	5.684	5.716	5.237	4.829	5.583	4.676	4.693	5.2	5.101	5.315	4.995
237797_at	DNM1L	1.781	1.564	1.792	2.166	1.87	1.771	1.608	1.576	1.448	1.938	1.622	1.718	1.634	1.664	1.763	1.9	1.755	1.765	1.74	1.697	1.423	2.104	1.838	1.99	1.685	1.979	1.842	2.099	1.867	1.808	1.668	1.64	1.662	1.83	1.91	1.863	1.58	1.837	1.719	1.616	1.792	1.754	1.954	1.802	1.823	1.872	1.797	1.639
218457_s_at	DNMT3A	6.735	6.927	5.371	6.982	5.892	5.484	6.474	6.661	5.906	6.317	5.622	6.966	6.748	7.451	5.589	6.908	5.776	6.385	6.819	5.519	6.521	5.405	5.638	6.737	6.72	5.778	5.827	6.867	6.018	6.836	6.369	5.651	7.405	6.875	5.661	5.981	5.891	4.982	5.533	4.7	6.8	4.888	5.505	6.408	4.807	5.725	5.1	6.016
239027_at	DOCK8	8.513	8.943	7.517	9.096	6.703	6.331	7.406	8.684	7.818	7.822	7.207	9.11	8.737	9.497	6.384	8.808	8.335	7.758	8.828	7.23	8.46	6.616	7.04	8.355	9.122	7.713	8.232	9.004	7.233	7.424	6.837	6.518	8.665	8.407	7.652	7.031	7.558	6.381	7.528	5.981	8.776	6.052	6.743	8.092	7.614	7.185	5.953	7.988
221677_s_at	DONSON	4.332	4.221	4.93	4.561	4.166	5.168	4.767	4.768	4.599	5.202	4.653	3.184	4.416	3.998	5.333	4.766	4.935	5.132	4.605	3.833	4.571	4.658	4.868	4.375	3.908	4.4	5.195	4.537	4.455	3.863	4.37	4.66	3.851	4.89	5.686	4.915	5.166	4.77	5.585	4.898	4.197	5.59	4.598	4.722	4.909	5.341	5.032	4.271
1564387_at	DOP1A	2.039	1.932	1.617	1.616	1.757	1.989	1.848	1.736	1.796	2.121	1.861	2.034	1.702	1.761	1.679	2.086	1.99	2.429	1.889	1.831	1.728	1.93	1.696	1.93	1.981	1.956	1.991	1.665	1.769	2.297	1.842	1.974	1.841	1.807	1.763	1.81	2.272	1.955	1.963	1.999	1.981	1.895	1.95	1.891	1.719	2.077	2.068	2.068
213267_at	DOP1A	2.881	3.35	3.798	3.953	3.956	4.195	4.367	4.71	3.868	4.746	3.436	2.929	4.254	3.649	4.253	3.984	3.385	4.226	3.999	3.453	3.723	3.844	3.996	3.447	3.549	4.587	3.532	3.461	3.614	3.06	3.405	3.977	3.543	4.251	4.52	3.652	4.028	3.441	4.417	3.665	3.955	4.643	3.097	3.206	3.968	4.018	3.907	3.63
215219_at	DOP1B	3.806	3.692	3.671	4.119	3.517	3.555	3.798	4.179	3.682	3.398	3.764	3.453	3.43	3.583	3.365	3.69	4.137	3.485	4.086	2.947	3.279	3.167	3.424	3.643	3.477	3.831	2.956	3.564	3.852	3.711	3.736	3.468	4.714	3.165	3.746	2.961	3.288	3.202	3.269	3.534	4.09	3.454	3.401	3.159	3.036	3.376	2.649	3.539
211478_s_at	DPP4	5.029	5.88	5.524	5.405	4.773	5.247	4.724	5.163	5.801	5.459	4.486	3.43	5.428	5.165	5.532	4.646	4.487	5.383	5.079	4.423	5.08	4.188	5.386	4.025	4.653	5.57	5.697	4.87	4.928	4.862	4.882	4.445	5.367	5.052	3.298	4.891	4.645	4.918	3.182	5.107	4.481	4.887	5.098	4.619	4.609	4.434	5.143	4.866
231957_s_at	DPP9	3.377	3.779	3.456	3.707	2.769	3.068	3.019	3.152	3.319	3.569	3.072	4.082	3.022	3.453	2.899	3.109	2.593	3.41	3.516	2.452	3.385	3.011	3.013	3.636	3.192	2.896	3.111	3.223	3.356	3.242	3.119	2.862	3.417	3.297	3.487	3.389	3.672	3.048	3.278	3.26	3.393	2.719	3.17	3.242	3.658	3.553	2.769	3.195
1570355_a_at	DPY19L1	1.742	1.687	1.694	1.798	1.575	1.611	1.806	1.862	1.717	1.65	1.799	2.027	1.546	1.455	2.059	1.61	1.694	1.673	1.759	1.671	1.732	1.895	1.687	1.725	1.828	1.698	1.635	2.069	1.933	1.668	1.462	1.616	1.709	1.521	1.826	1.61	1.657	1.814	1.784	1.542	2.007	1.54	1.586	1.522	1.637	1.568	1.872	1.862
212792_at	DPY19L1	4.221	5.135	6.049	5.469	5.467	6.08	4.829	5.831	4.946	6.133	6.023	4.555	5.421	4.758	5.652	5.681	5.607	6.311	5.808	5.653	5.525	5.924	5.142	5.008	4.994	6.466	5.64	5.164	5.699	4.684	4.573	5.84	4.983	5.696	6.334	5.575	6.273	5.881	6.131	5.971	5.24	6.141	4.353	4.892	6.222	6.047	6.063	5.486
236055_at	DQX1	2.904	2.507	2.734	2.833	3.147	2.677	3.048	2.559	2.639	2.565	3.242	2.907	2.683	2.968	3.168	2.816	2.633	2.645	2.619	2.528	2.682	3.063	3.012	3.001	2.728	2.159	2.62	3.457	2.947	3.225	3.212	2.659	2.93	2.533	2.795	3.988	3.418	3.355	2.794	3.402	3.329	3.172	3.139	3.219	2.748	3.218	3.131	2.931
1554340_a_at	DRAXIN	2.517	2.628	3.208	2.821	2.899	2.808	2.784	3.102	2.681	3.948	3.171	3.203	2.745	2.826	2.879	2.435	2.863	2.818	3.02	2.881	2.715	2.936	2.525	2.328	2.783	3.033	2.68	2.51	2.73	3.074	2.319	2.992	2.214	3.381	2.172	2.828	2.699	2.344	2.506	2.374	2.639	2.671	2.795	2.437	2.737	2.853	2.813	2.744
1558368_s_at	DRAXIN	3.575	3.482	4.603	3.886	3.612	3.606	3.706	3.768	4.367	4.17	3.996	4.429	4.238	4.086	3.878	3.768	4.816	4.457	3.827	3.82	4.166	4.395	3.941	4.133	3.605	3.788	3.842	2.904	3.421	3.555	3.422	4.602	3.654	4.392	2.911	3.812	4.061	3.18	3.272	3.827	3.677	3.733	3.849	3.901	4.408	3.315	3.794	3.906
207324_s_at	DSC1	2.61	3.487	2.146	2.458	2.828	3.454	2.331	4.025	3.481	4.441	3.596	2.759	4.576	2.888	3.656	3.042	2.247	2.07	1.95	2.619	3.287	2.336	3.061	4.278	2.58	4.705	2.143	3.399	2.547	2.187	3.181	2.254	2.475	3.166	1.6	1.934	2.633	3.189	1.951	1.762	2.255	1.763	3.305	2.574	2.283	2.219	3.223	2.269
211514_at	DSTYK	2.812	2.168	2.61	2.818	2.395	2.094	2.532	2.288	2.274	2.469	2.547	2.253	2.233	2.627	2.424	2.413	2.207	2.192	2.448	2.185	2.33	2.414	2.649	2.422	2.48	2.691	2.426	2.714	2.781	2.349	1.968	2.187	2.277	3.376	1.88	2.539	2.686	2.179	2.578	2.231	2.514	2.261	2.529	2.6	2.266	2.269	2.243	2.361
211515_s_at	DSTYK	4.209	3.041	3.895	3.645	3.502	3.553	3.386	3.794	4.092	3.116	3.389	4.163	3.964	4.01	3.84	3.845	3.007	3.454	3.788	3.253	3.692	3.643	3.031	3.551	3.77	4.459	3.347	3.813	3.852	3.049	2.915	3.652	3.962	3.474	3.005	4.118	3.724	3.094	3.135	3.051	3.933	3.203	3.356	3.582	3.683	3.664	3.097	3.3
1555210_at	DTWD1	1.818	1.761	1.728	1.769	1.685	1.515	1.965	1.811	2.142	1.57	1.914	1.818	1.803	2.029	1.869	1.658	1.992	1.876	1.639	1.753	1.773	2.152	2.121	1.671	1.561	1.451	2.005	1.963	1.811	1.893	1.826	1.568	1.965	1.931	1.774	1.621	2.129	2.134	2.046	1.714	1.517	1.675	2.048	1.945	1.731	1.818	1.71	1.824
219291_at	DTWD1	2.961	2.866	2.983	3.278	3.402	4.093	2.873	3.385	3.31	3.597	3.485	2.295	3.244	3.367	3.364	3.637	3.281	3.541	3.21	2.96	3.387	3.522	2.968	2.926	3.775	3.811	3.447	3.45	3.073	2.69	2.905	3.821	3.314	3.434	3.965	3.418	3.449	4.021	4.174	3.822	3.411	4.253	2.934	3.174	2.924	3.768	4.296	3.425
205761_s_at	DUS4L	3.134	3.368	3.882	3.614	2.946	4.422	3.279	3.765	3.897	4.145	3.811	2.881	3.355	3.042	3.995	3.662	3.249	3.754	3.635	3.111	2.872	4.017	3.163	3.402	3.478	4.024	3.839	3.302	3.091	2.925	2.693	3.461	2.927	3.84	3.98	3.864	4.036	3.752	3.985	4.036	3.437	4.03	3.043	3.553	3.779	4.504	3.613	3.316
205762_s_at	DUS4L	2.64	2.868	2.706	2.932	2.892	3.197	2.777	2.456	2.474	2.804	3.033	2.276	2.502	2	2.894	2.589	2.512	2.463	2.203	2.329	2.724	2.888	2.349	2.354	2.473	2.684	2.349	2.439	2.617	2.336	2.283	2.524	2.67	2.201	2.753	2.598	2.842	2.753	2.873	2.631	2.742	3.193	2.439	2.699	2.65	2.957	3.125	2.625
204014_at	DUSP4	2.289	2.577	2.341	2.401	2.331	2.897	3.264	2.591	2.341	2.317	2.36	2.528	2.311	2.167	2.637	2.481	2.377	2.268	2.766	2.398	2.322	2.24	2.214	2.384	2.381	2.388	2.173	2.308	2.487	2.288	2.489	2.4	2.657	2.761	2.097	2.498	2.332	2.429	2.69	3.221	2.295	2.704	2.414	2.236	2.454	2.477	2.258	2.832
226034_at	DUSP4	3.503	2.982	3.484	2.525	2.94	2.982	2.932	3.372	2.514	2.574	3.055	3.161	2.632	2.593	2.81	2.959	2.495	3.2	3.155	3.063	2.992	3.634	2.773	3.234	2.919	3.217	2.867	3.463	3.54	3.097	2.889	3.15	2.697	2.97	3.669	3.612	3.443	3.079	3.06	3.404	3.191	3.491	3.462	2.977	3.305	3.001	3.222	2.932
228116_at	DUXAP10	4.211	3.927	3.54	3.32	3.938	3.392	3.486	3.924	4.45	3.418	3.778	4.005	3.572	4.095	3.546	3.407	3.928	3.904	3.555	3.897	3.719	4.454	4.077	4.115	3.462	4.076	4.052	3.619	4.216	4.153	4.125	3.822	3.936	3.714	3.866	4.084	3.687	3.999	4.762	4.603	4.209	4.546	4.516	3.997	4.205	5.136	4.324	4.277
242881_x_at	DUXAP10	2.22	1.641	2.038	1.831	2.805	2.621	2.345	2.257	2.473	2.334	2.156	2.115	2.31	2.464	2.015	2.104	2.469	2.441	1.822	2.395	1.965	2.351	1.974	1.94	2.277	2.127	1.998	2.208	2.195	2.445	2.288	1.956	2.33	2.398	1.657	2.365	2.058	1.611	3.716	2.027	2.123	2.687	1.889	2.044	2.487	3.954	2.186	2.825
213162_at	DYNC1LI2	2.819	2.431	2.281	2.456	2.573	2.305	2.496	2.413	2.31	2.463	2.334	3.062	2.532	2.292	2.699	2.574	2.322	2.331	2.305	2.482	2.623	2.591	2.333	2.567	2.491	2.7	2.332	2.537	2.583	2.577	2.743	2.896	2.773	2.087	2.689	2.604	2.571	2.483	2.302	2.274	2.368	2.147	2.604	2.785	2.461	2.684	2.064	2.697
211079_s_at	DYRK1A	2.399	2.435	2.124	2.157	2.065	2.27	2.172	2.029	2.341	2.002	2.675	2.549	2.116	2.537	2.182	2.06	2.018	2.418	2.207	2.456	2.177	2.666	2.376	2.26	2.104	2.124	1.94	2.646	1.985	2.228	2.196	2.243	2.334	2.231	2.31	2.366	2.126	2.109	2.028	2.243	2.494	1.979	2.1	2.344	1.883	2.122	2.101	2.575
211541_s_at	DYRK1A	3.138	2.867	2.667	2.295	2.987	2.425	2.771	2.432	2.656	2.725	2.739	3.253	2.817	3.134	2.534	2.793	2.951	2.787	2.604	2.67	2.538	2.798	2.696	2.849	2.735	2.195	2.761	2.679	2.91	3.41	3.205	2.382	2.877	2.622	3.035	3.039	3.113	3.117	2.736	2.968	2.758	2.536	3.299	3.219	2.888	3.158	2.986	2.777
207231_at	DZIP3	4.415	4.451	5.199	4.643	5.152	4.977	5.01	5.833	5.589	4.988	4.788	3.227	4.49	5.195	4.584	5.454	4.712	4.874	5.671	4.945	4.338	3.95	4.579	3.862	5.755	5.114	4.372	4.326	4.191	4.247	4.245	4.889	4.924	5.155	6.31	4.711	4.947	4.509	4.538	5.187	4.931	5.272	4.451	4.111	4.326	5.036	4.734	4.538
207232_s_at	DZIP3	4.631	4.741	4.642	4.56	4.547	4.686	4.195	5.4	5.095	5.138	4.295	3.948	4.139	4.796	4.886	5.136	3.985	4.807	5.178	4.445	4.275	3.984	5.006	4.59	4.856	5.191	5.078	4.577	4.275	3.935	4.137	4.315	4.334	4.778	6.024	4.648	5.518	4.363	5.122	5.1	4.712	5.191	4.501	4.414	4.364	5.362	4.511	4.843
213186_at	DZIP3	4.413	4.962	5.125	5.012	5.777	6.33	5.177	5.904	6.071	6.099	5.417	4.134	5.257	5.151	5.785	5.693	5.123	5.845	5.969	5.664	4.648	5.336	5.437	4.35	5.322	5.669	5.652	5.032	4.949	4.625	4.867	5.555	5.202	5.353	7.344	5.805	6.436	5.842	6.373	6.08	5.071	6.268	4.82	5.078	5.451	6.241	5.844	5.385
228033_at	E2F7	1.789	2.188	2.331	2.34	1.969	2.293	2.17	2.009	2.03	2.018	2.342	2.185	1.783	2.052	2.572	2.243	1.957	2.043	2.011	2.069	1.839	2.263	2.17	2.097	2.04	2.141	2.173	2.042	2.126	2.099	2.024	1.905	2.043	2.333	3.917	2.739	2.92	2.374	3.274	2.255	2.592	2.303	2.168	1.936	2.298	2.41	2.458	2.137
241725_at	E2F7	3.141	2.664	2.813	2.603	2.96	2.597	2.538	2.924	2.735	2.649	2.676	3.239	2.737	3.169	2.87	2.73	2.963	2.794	2.826	2.66	2.714	2.998	2.682	3.223	2.621	2.57	3.138	2.769	2.791	3.334	3.208	2.817	2.658	2.911	2.971	3.38	3.056	3.434	2.82	3.32	3.121	2.699	3.299	3.114	2.947	3.265	2.886	2.879
219990_at	E2F8	1.786	2.025	1.928	2.029	1.95	2.098	2.757	2.005	1.983	2.172	1.702	2.084	2.11	1.858	2.839	2.593	2.151	2.091	1.917	2.057	1.913	2.39	1.976	2.236	2.218	2.053	2.015	2.332	1.865	1.929	1.984	1.717	2.04	2.098	3.054	1.997	2.673	2.158	3.191	2.701	2.158	2.398	2.466	2.274	2.255	2.65	2.193	2.058
227646_at	EBF1	4.938	5.572	6.62	6.273	6.5	6.889	6.725	6.85	6.16	6.64	6.043	4.492	6.522	5.802	6.409	6.721	6.77	6.471	6.139	6.937	3.976	6.304	6.678	5.046	6.928	6.533	5.404	6.517	5.746	6.709	3.751	6.465	6.047	6.348	5.698	5.02	6.167	5.501	6.762	6.571	4.603	6	6.199	5.572	5.874	6.993	5.745	6.072
229487_at	EBF1	2.882	3.423	4.605	4.072	4.267	5.035	4.96	4.289	3.967	4.84	4.104	3.836	4.277	3.482	4.429	4.413	4.648	4.158	4.026	4.847	2.899	4.729	4.167	3.609	4.497	4.032	3.92	3.966	4.057	4.299	3.199	4.402	3.604	4.046	4.371	3.714	4.292	3.565	5.084	4.407	3.309	4.027	4.193	3.676	4.266	4.566	4.017	4.222
232204_at	EBF1	4.11	3.768	5.198	4.323	4.697	4.923	5.185	5.028	4.142	4.048	4.235	3.481	4.506	4.481	4.372	4.417	5.158	4.273	4.682	4.951	3.556	4.404	4.345	4.036	4.767	5.057	3.448	4.572	4.55	4.441	3.136	4.572	5.222	4.542	4.033	3.698	4.828	3.931	4.62	4.972	3.913	4.518	4.75	3.769	4.355	4.886	3.797	4.276
233261_at	EBF1	2.363	2.639	3.796	4.857	2.468	2.258	2.635	4.496	1.865	4.187	3.344	2.332	4.572	3.962	1.995	4.563	2.517	2.699	4.05	2.977	2.034	2.308	2.511	3.144	4.984	4.262	2.182	4.499	2.045	2.946	1.781	1.823	4.1	3.208	2.438	2.557	2.708	2.09	2.324	1.964	2.82	1.763	2.127	2.556	2.737	2.939	2.46	2.788
212427_at	ECPAS	3.663	3.754	3.997	4.685	3.929	4.143	3.716	4.638	4.178	4.184	3.569	3.617	3.747	3.84	3.911	4.324	4.008	3.954	4.111	4.217	3.813	4.051	4.238	3.996	3.817	4.035	4.389	3.785	3.602	3.03	3.468	4.124	3.913	3.948	4.337	3.68	4.229	3.992	3.906	4.292	4.035	4.785	3.546	3.701	4.666	4.219	3.973	4.004
236368_at	ECPAS	5.391	5.744	5.377	5.986	4.94	5.088	5.633	6.465	5.192	5.381	5.335	5.507	6.385	5.763	4.953	5.534	5.06	5.385	5.676	5.117	5.965	5.1	5.285	5.525	5.965	6.003	5.542	5.039	5.051	6.015	4.955	5.244	5.81	5.717	5.393	5.304	5.279	3.945	4.802	3.971	5.951	3.876	3.955	5.739	5.229	5.327	4.284	5.162
223623_at	ECRG4	4.682	5.1	3.663	4.643	4.843	5.093	4.436	4.768	5.489	5.38	4.839	4.09	4.915	5.752	4.49	5.282	4.165	4.757	3.902	5.044	4.753	5.592	5.529	4.826	4.327	5.099	4.738	5.307	4.021	4.755	4.466	4.958	5.311	4.809	2.42	5.005	4.514	4.484	3.376	4.484	3.864	4.688	4.666	4.835	4.147	5.06	5.042	4.862
219787_s_at	ECT2	2.338	2.331	2.804	3.335	2.746	3.889	3.001	3.525	2.578	3.331	3.689	2.458	3.103	1.939	2.842	2.863	2.621	3.34	3.584	2.481	2.48	2.608	2.22	2.239	2.905	3.422	2.927	2.639	2.986	2.317	2.279	3.199	2.465	3.073	5.044	3.414	3.078	3.226	4.179	3.67	2.684	4.35	2.44	2.749	3.41	3.207	4.07	2.456
220342_x_at	EDEM3	6.373	5.873	5.868	6.755	5.308	4.96	5.188	6.788	4.983	6.2	6.044	6.386	6.413	6.681	5.324	6.413	6.05	6.126	6.684	5.342	5.848	4.337	5.101	5.912	6.448	5.938	5.72	6.088	5.66	5.564	4.102	5.354	5.787	6.413	6.617	5.934	5.907	4.979	6.016	3.981	6.225	4.336	3.441	5.966	5.181	6.076	4.448	6.075
220926_s_at	EDEM3	6.021	5.979	6.36	6.459	5.852	7.15	5.862	6.645	5.7	7.295	6.811	5.266	6.131	5.886	6.9	6.226	6.568	6.338	6.872	5.985	6.513	5.652	5.864	5.407	5.93	6.941	6.553	5.985	6.141	5.318	5.248	6.577	5.202	6.54	6.957	6.3	6.635	6.647	6.784	6.242	5.208	6.969	4.626	5.5	6.804	6.31	6.71	6.752
204840_s_at	EEA1	2.163	2.819	2.324	3.321	2.035	2.24	1.911	3.94	1.555	3.484	1.911	2.09	2.984	3.518	2.13	3.31	2.095	2.849	4.196	1.815	2.654	1.757	1.813	2.518	2.808	2.133	2.613	3.042	2.089	1.846	1.849	1.942	3.366	3.089	3.114	2.237	2.6	1.722	2.957	1.753	2.379	1.763	1.383	2.269	2.596	2.04	1.893	1.874
204841_s_at	EEA1	2.046	2.282	2.176	2.428	2.275	1.998	1.921	2.128	2.142	2.625	1.974	2.042	2.104	1.922	2.162	2.125	2.076	2.294	2.341	1.709	2.087	2.185	1.636	2.132	2.025	2.168	2.024	2.039	2.016	2.52	2.153	1.988	2.043	1.975	2.446	2.663	2.544	2.605	2.576	2.122	2.64	2.62	2.623	2.275	1.993	2.57	2.423	2.032
225885_at	EEA1	5.209	6.342	6.335	6.354	6.43	7.334	5.764	6.618	5.93	7.215	7.262	4.317	6.378	5.932	6.567	6.796	6.302	7.077	6.806	5.613	6.187	6.126	5.933	5.478	5.837	7.145	6.803	5.606	5.795	5.762	5.62	6.732	5.204	6.098	7.309	6.325	6.898	7.029	7.341	7.051	5.325	7.493	5.224	5.46	6.558	7.139	7.155	6.503
204905_s_at	EEF1E1	3.363	3.917	3.701	4.035	4.288	6.617	3.875	3.938	3.811	5.634	5.411	3.462	4.287	3.46	4.393	4.677	3.893	4.67	4.017	4.352	5.566	4.513	4.092	3.766	5.17	5.87	4.174	3.735	3.569	4.314	3.493	4.238	3.268	4.431	5.801	4.547	4.802	4.907	5.615	5.39	4.155	5.725	3.41	4.545	4.321	5.493	5.691	4.248
213907_at	EEF1E1	2.361	2.745	2.561	2.49	2.61	2.951	3.108	2.355	2.489	2.521	2.453	2.907	2.552	2.444	2.371	2.489	2.369	2.309	2.114	2.658	2.37	2.569	2.842	2.41	2.597	2.263	2.562	2.05	2.527	2.58	2.873	2.606	2.364	2.288	3.087	2.539	2.625	2.711	2.867	2.72	2.487	2.783	2.557	2.893	2.494	3.011	2.529	2.542
225631_at	EEPD1	6.649	5.888	4.932	5.767	5.115	5.201	6.174	4.97	5.136	5	4.998	5.884	5.437	5.285	5.64	4.698	6.148	4.988	5.856	5.63	5.22	4.738	5.511	4.979	5.851	5.047	5.661	5.544	5.79	5.05	5.994	5.503	5.55	5.386	4.578	5.246	4.423	4.805	4.237	5.047	5.322	5.351	5.986	5.668	4.758	4.99	4.913	5.117
226800_at	EFCAB7	2.069	2.354	3.137	3.336	3.329	4.131	3.099	3.1	3.018	3.582	3.455	2.61	2.841	2.484	3.49	2.777	2.594	3.014	2.95	2.901	2.53	2.717	2.57	2.505	2.887	3.631	2.631	2.615	2.55	3.222	2.426	2.969	2.506	3.253	4.748	3.568	3.813	3.399	3.96	3.101	2.737	4.481	2.731	2.422	3.536	3.735	3.9	2.85
206580_s_at	EFEMP2	4.155	4.754	3.727	4.911	4.929	5.157	5.583	4.876	5.065	4.874	3.906	4.773	4.571	4.944	4.82	4.932	4.596	4.475	4.691	5.318	5.022	5.464	5.213	4.952	5.153	3.769	4.508	4.999	5.023	4.337	5.109	5.407	4.791	4.824	4.589	4.139	4.513	5.505	4.468	3.939	4.444	4.194	4.686	4.607	3.811	4.366	5	4.641
209356_x_at	EFEMP2	3.407	3.274	3.096	3.422	3.596	3.786	3.392	3.384	3.846	3.971	3.248	3.947	3.286	3.492	3.18	3.745	3.888	3.54	3.369	3.711	4.313	3.823	3.872	3.689	4.007	3.286	4.284	4.03	3.368	3.748	4.154	4.019	3.647	3.812	3.214	3.39	3.258	4.529	3.793	3.497	3.254	3.533	4.062	3.914	3.478	3.476	3.615	3.985
1557749_at	EHBP1L1	6.816	6.79	5.809	8.129	5.995	5.8	6.777	7.875	5.309	6.476	5.762	7.545	7.897	7.856	5.479	7.244	6.452	6.76	7.491	6.015	6.935	5.664	6.232	7.164	7.35	6.368	6.363	6.589	6.62	6.983	5.807	5.687	7.473	6.663	6.254	4.905	6.647	5.384	6.503	4.475	7.302	4.849	4.946	6.9	6.095	5.845	4.695	6.029
222873_s_at	EHMT1	2.761	3.008	2.68	3.195	2.005	2.224	2.781	3.146	2.49	2.226	2.665	2.582	2.613	3.046	2.543	2.75	2.539	2.519	3.323	2.32	2.76	2.904	2.466	3.009	2.783	2.432	2.609	2.472	2.461	2.917	2.446	2.133	3.4	2.228	2.488	2.068	2.614	2.043	2.432	2.127	2.914	2.284	2.593	2.596	2.186	2.477	2.355	2.473
231292_at	EID3	2.853	2.898	2.779	2.758	3.088	4.24	2.977	3.167	3.085	3.651	3.258	2.312	2.825	2.562	3.212	3.625	2.323	3.859	3.207	2.541	3.148	2.84	2.913	2.589	2.58	3.959	3.432	2.772	2.707	2.659	2.633	3.709	2.498	3.338	3.961	3.503	3.299	3.553	3.618	3.144	2.729	4.342	2.479	3.377	3.551	3.788	3.514	2.352
204409_s_at	EIF1AY	4.888	1.577	4.405	1.425	1.575	1.396	1.332	1.678	1.577	5.233	4.626	4.381	4.573	4.021	4.893	4.636	5.461	4.042	1.401	3.903	5.896	4.207	4.31	3.88	5.323	5.214	4.897	5.231	4.957	4.434	3.677	5.354	4.725	4.282	6.029	3.942	5.566	1.507	4.863	1.517	3.863	5.192	3.717	6.519	4.435	5.783	6.757	1.477
204410_at	EIF1AY	5.637	2.93	5.724	2.36	2.351	2.253	2.393	2.383	2.75	5.82	6.119	5.541	6.01	5.151	5.184	5.501	5.999	5.174	2.469	5.231	5.999	5.106	5.338	5.453	5.631	6.191	5.592	5.851	6.101	4.973	5.137	6.149	5.437	4.911	6.438	5.126	5.871	2.263	5.068	2.252	4.915	5.719	5.182	6.546	4.958	6.158	6.608	2.052
242898_at	EIF2AK2	3.65	3.352	3.212	4.764	3.276	3	3.669	4.049	3.851	3.215	3.158	4.148	3.881	3.525	3.077	3.244	3.172	3.859	3.721	3.486	3.472	3.45	3.091	3.304	3.562	3.297	4.405	3.424	3.218	3.935	3.59	3.877	3.479	5.376	3.728	3.865	3.78	3.903	3.216	3.681	3.331	4.215	3.647	3.476	3.408	2.927	3.367	3.816
201143_s_at	EIF2S1	7.21	7.081	6.333	7.307	5.652	8.308	5.136	7.219	5.796	7.248	8.123	6.547	7.653	7.351	7.086	8.029	6.815	7.794	7.622	6.771	6.615	5.853	6.799	4.982	7.607	8.377	7.648	7.457	7.484	6.338	7.74	7.307	5.907	5.712	7.102	6.638	6.577	7.39	7.757	7.206	7.566	7.414	6.736	7.32	7.867	7.539	5.754	6.905
236700_at	EIF3C	3.694	3.996	3.888	5.145	3.89	3.355	4.186	5.004	3.815	4.953	4.033	3.542	4.279	4.169	4.54	4.177	4.682	4.561	4.85	3.96	4.018	4.381	4.142	3.625	4.234	4.848	4.065	3.891	3.712	3.81	3.609	3.381	4.805	5	4.365	3.618	3.504	3.475	3.286	3.923	3.993	3.837	3.17	3.15	4.85	3.205	3.528	3.375
201436_at	EIF4E	2.516	3.085	3.614	3.381	3.229	4.871	3.524	3.721	3.096	4.141	4.136	3.075	3.382	3.383	4.066	3.825	3.864	3.676	3.827	3.549	3.965	3.009	3.086	3.092	3.514	4.975	3.053	3.42	3.954	3.3	3.02	4.235	3.001	3.641	5.144	3.693	4.01	4.141	4.081	3.83	3.212	5.172	2.792	3.502	3.703	4.309	4.322	3.393
201437_s_at	EIF4E	4.568	4.628	5.203	5.223	5.814	6.716	5.358	5.343	5.416	6.387	5.74	4.489	5.518	5.093	5.979	5.731	5.105	5.333	5.658	5.623	5.722	5.148	5.426	4.626	5.858	6.147	5.393	5.121	5.325	4.986	4.975	5.816	4.888	5.666	6.506	4.994	5.813	5.697	6.358	5.494	4.479	6.035	4.627	5.227	5.316	5.605	6.315	5.644
225939_at	EIF4E3	4.668	4.79	4.793	5.566	4.97	5.782	5.104	4.811	5.001	4.241	4.655	4.733	5.161	4.753	4.724	4.955	5.161	5.003	5.485	4.077	5.148	4.657	4.612	4.111	4.943	4.698	5.008	4.502	5.24	4.582	3.297	5.527	3.813	4.774	5.442	4.872	4.895	5.59	5.134	5.432	4.328	5.422	4.362	4.895	5.474	4.831	4.936	5.102
238461_at	EIF4E3	6.186	5.504	6.007	6.816	4.94	5.845	5.299	6.01	5.956	5.127	6.026	6.658	5.869	5.837	5.517	5.939	5.851	6.208	6.62	3.764	5.749	4.898	5.141	5.275	5.213	5.692	6.368	5.85	5.744	4.782	4.345	5.86	4.485	6.053	5.931	6.114	6.189	5.995	6.515	4.975	6.335	5.488	6.064	5.737	6.588	6.084	4.592	5.825
220198_s_at	EIF5A2	2.687	2.559	2.976	2.699	2.974	3.332	2.777	3.155	2.82	3.021	3.396	2.985	2.817	2.625	3.179	3.035	2.768	3.003	2.744	3.162	2.717	3.039	3.015	2.688	2.794	3.324	2.673	2.902	2.628	3.216	2.766	3.108	2.687	2.527	3.624	3.585	3.299	2.983	3.258	3.271	3	3.718	3.048	2.76	3.203	3.974	2.942	2.82
235289_at	EIF5A2	3.268	3.771	4.313	4.369	4.594	4.96	4.268	4.527	4.189	4.867	5.031	3.973	4.502	3.64	4.089	4.807	4.155	4.732	3.981	4.485	4.297	5.083	4.167	3.604	4.367	5.194	4.077	3.917	3.966	4.434	3.902	4.842	4.021	3.874	5.327	4.84	4.59	3.88	4.963	4.502	3.966	5.919	3.688	4.38	5.416	5.091	4.652	4.212
235296_at	EIF5A2	2.358	4.118	4.17	4.105	4.11	4.816	3.414	3.886	3.648	4.851	4.892	3.42	3.797	2.947	3.924	4.915	3.89	4.722	3.487	3.498	3.556	3.644	3.671	3.068	3.594	4.861	4.347	3.344	3.476	3.168	3.318	4.03	3.209	3.97	5.755	4.277	4.665	4.639	5.383	3.941	3.198	5.655	3.357	3.817	4.846	5.065	4.55	3.81
201026_at	EIF5B	4.548	4.838	4.036	5.249	4.712	4.886	5.154	5.898	4.705	4.897	3.995	4.141	5.456	4.823	5.273	4.589	4.632	4.566	5.27	5.362	4.512	3.9	5.056	4.674	5.123	4.08	4.528	4.295	5.097	4.382	4.789	5.191	5.133	5.272	5.154	4.448	4.701	4.647	5.1	4.594	3.969	4.734	4.257	4.735	4.204	5.076	4.476	4.395
214313_s_at	EIF5B	2.239	2.295	1.925	2.539	2.552	2.714	3.189	3.04	1.948	2.897	1.702	1.917	2.344	2.072	2.516	1.944	2.838	2.449	2.58	2.402	2.028	2.013	2.537	1.872	2.363	2.278	2.228	2.363	2.134	1.716	2.792	2.838	2.244	2.514	2.619	1.989	2.143	2.358	2.492	1.937	1.836	2.626	1.913	2.328	1.934	2.985	2.021	1.787
214314_s_at	EIF5B	2.872	4.033	2.927	4.892	4.395	4.593	4.345	4.784	4.185	4.961	2.463	2.775	4.072	4.339	5.215	4.274	4.181	4.091	4.547	4.339	4.041	4.248	4.395	3.903	4.551	3.069	3.75	4.094	3.961	1.953	3.886	4.45	4.669	4.827	4.844	3.575	3.99	3.756	4.575	3.171	3.694	4.364	2.449	3.167	3.312	3.505	3.778	4.039
244660_at	ELAVL1	2.335	1.907	2.576	2.344	2.908	2.76	2.317	2.33	2.574	2.74	2.538	2.157	2.399	2.348	2.694	2.426	2.999	2.588	2.444	2.837	2.689	2.498	2.538	2.515	2.607	2.703	2.507	2.192	2.127	2.431	2.297	2.48	2.409	2.342	2.477	2.651	2.627	2.338	2.67	2.407	2.153	2.839	2.347	2.252	2.734	2.649	2.732	2.32
219532_at	ELOVL4	2.375	2.459	2.853	2.499	2.789	3.183	2.46	2.414	2.649	2.538	2.966	2.403	2.439	2.374	2.503	2.497	3.258	2.728	2.548	2.403	2.565	2.527	2.634	2.237	2.363	2.883	3.411	2.327	2.11	2.64	2.45	2.684	2.536	2.344	3.415	2.893	2.785	2.664	3.331	2.909	2.606	3.952	2.177	2.392	2.876	2.419	2.568	2.092
203584_at	EMC2	4.573	4.731	5.242	5.464	4.612	7.211	5.214	5.107	4.648	6.1	5.66	4.014	5.187	4.249	5.748	5.18	5.517	5.599	5.728	4.947	5.676	5.104	4.96	4.214	5.759	5.797	5.68	5.051	5.226	4.319	4.271	5.537	4.711	5.813	6.887	5.1	5.9	6.313	6.361	5.699	4.203	6.617	3.739	4.822	5.532	6.004	6.36	4.977
212570_at	ENDOD1	3.704	3.761	4.281	4.546	4.712	3.591	3.901	4.815	5.018	5.487	5.483	6.518	4.141	5.824	4.024	4.5	4.767	5.255	4.904	4.103	4.561	4.168	4.782	4.524	4.091	4.706	5.098	4.519	3.98	5.133	3.535	4.665	3.978	3.884	5.527	4.853	6.212	4.429	6.004	4.314	5.353	4.513	5.425	5.928	4.781	6.584	5.497	4.767
228682_at	ENOPH1	1.96	1.73	2.053	2.122	2.139	1.861	2.232	2.033	2.086	1.898	2.109	2.41	1.88	2.151	1.955	1.979	2.497	1.883	1.968	1.971	2.033	2.168	2.144	2.127	1.973	2.237	2.115	1.987	1.703	2.531	2.114	2.03	2.183	1.839	2.21	2.22	2.158	2.013	1.987	2.133	1.915	2.09	2.539	2.097	2.209	2.347	1.802	2.094
227803_at	ENPP5	2.116	2.084	3.405	3.456	3.121	2.913	2.201	3.529	2.274	4.212	3.424	2.06	2.905	2.47	3.326	3.398	3.366	4.678	3.281	2.567	3.213	2.764	2.709	2.208	2.474	4.094	4.022	2.299	2.825	2.647	2.086	3.744	2.228	3.616	5.233	3.408	4.112	2.147	5.398	2.937	2.813	5.249	2.201	3.619	4.825	4.111	4.173	3.306
237054_at	ENPP5	2.069	2.344	2.294	2.082	2.234	2.521	1.936	2.179	2.168	3.074	2.515	1.832	1.819	1.918	2.584	2.225	2.154	3.113	2.139	1.982	2.339	2.314	1.944	1.975	1.923	2.205	2.788	2.564	2.297	2.113	1.866	2.209	2.187	2.386	3.476	3	2.709	2.259	3.814	2.705	2.321	3.869	1.899	2.179	3.574	2.793	2.81	2.1
221487_s_at	ENSA	4.237	4.604	4.89	4.019	5.873	4.163	4.675	4.497	5.209	4.521	4.905	5.831	4.663	5.215	4.328	4.644	4.838	4.754	4.584	4.433	4.87	4.864	4.742	4.55	4.556	4.11	4.733	4.092	4.557	4.694	4.29	4.608	3.831	3.555	4.658	4.737	4.732	4.93	4.982	4.718	4.699	4.432	4.891	5.913	4.604	5.66	6.008	4.946
228585_at	ENTPD1	6.736	6.774	6.03	7.201	6.495	7.262	6.925	6.608	6.452	7.203	6.071	6.749	6.968	6.01	6.913	6.2	7.243	6.625	7.36	7.139	6.771	6.553	6.741	6.169	6.966	6.334	7.347	6.641	7.326	4.993	5.972	7.164	5.763	6.736	6.074	5.68	5.83	7.42	6.345	6.007	6.159	6.316	5.789	6.256	6.315	5.824	6.696	6.283
206710_s_at	EPB41L3	5.075	5.893	6.04	5.884	4.816	5.614	6.219	6.332	5.677	5.44	5.135	4.499	6.054	5.775	6.172	4.998	6.111	6.077	6.112	5.592	5.796	5.231	6.265	5.65	6.173	5.08	6.947	5.857	6.539	4.572	5.309	6.223	5.752	6.964	6.27	5.488	6.307	6.929	5.79	6.498	5.891	5.518	5.849	5.779	5.958	5.69	6.264	5.664
211776_s_at	EPB41L3	4.327	4.698	4.936	5.008	3.412	4.422	5.463	5.446	4.444	4.614	4.188	3.934	4.887	4.863	5.062	3.959	5.167	5.475	5.435	4.411	4.97	4.417	5.036	4.326	5.232	4.124	5.701	4.75	5.269	3.37	4.591	5.153	4.921	6.123	5.401	4.725	5.447	5.703	5.094	5.009	5.24	4.289	4.808	4.831	5.13	4.795	4.749	4.223
212681_at	EPB41L3	4.584	5.09	5.256	5.07	4.285	4.983	5.669	5.463	4.664	4.664	4.259	4.207	5.5	5.048	5.2	4.296	5.377	5.644	5.046	4.956	5.18	5.109	5.442	4.498	6.13	4.557	5.747	5.039	5.851	4.425	5.014	6.058	4.946	6.107	5.797	5.031	5.478	6.256	5.328	5.83	4.566	5.054	5.253	5.295	5.52	5.04	5.889	4.397
238633_at	EPC1	3.124	3.077	3.14	3.314	2.849	3.846	3.158	3.427	3.19	3.766	3.361	3.432	3.234	2.972	3.233	3.275	3.397	3.166	2.933	3.375	2.969	3.211	3.4	3.378	2.593	3.979	3.571	2.531	3.261	2.907	3.646	3.555	3.192	3.378	3.741	2.969	3.531	3.748	3.477	3.684	3.132	4.651	3.016	3.205	3.388	4.005	3.818	3.403
1563471_at	EPG5	4.908	3.445	3.968	4.01	3.706	3.579	4.101	4.542	2.802	3.827	3.477	3.587	4.103	4.694	3.305	4.413	4.044	3.091	4.2	3.58	4.495	3.222	3.79	4.02	4.392	4.458	2.802	4.427	3.93	4.637	3.887	4.088	4.54	4.171	4.142	3.627	4.004	3.773	3.712	3.698	4.162	3.732	3.716	4.119	3.728	3.473	2.902	3.602
1562249_at	EPHA1-AS1	3.14	2.738	3.237	3.836	2.829	2.954	3.118	3.393	3.515	3.715	3.238	2.218	2.887	3.073	2.414	3.558	2.409	2.699	3.945	2.337	3.544	2.473	3.343	2.563	3.518	3.414	2.575	3.598	2.934	2.359	2.223	3.213	3.279	3.644	3.434	2.849	2.435	2.109	2.948	2.156	1.834	2.296	2.467	2.79	3.554	3.124	2.672	3.316
238263_at	EPHA1-AS1	3.502	3.013	4.402	3.722	4.384	3.899	4.477	4.582	3.813	4.653	4.303	3.685	2.542	3.668	3.392	2.93	2.546	2.428	3.808	3.61	4.192	4.364	3.586	3.471	3.766	3.623	3.578	3.708	3.854	4.107	4.639	3.982	4.978	2.221	3.003	3.589	2.733	3.717	3.207	3.7	2.862	3.745	3.779	3.441	3.703	2.962	3.134	3.749
209368_at	EPHX2	5.356	6.031	5.271	5.461	5.178	5.86	5.372	6.098	6.387	5.358	4.783	5.061	5.611	6.208	6.141	5.681	5.457	5.783	4.726	5.202	5.478	5.552	5.667	5.786	5.483	5.285	5.2	5.958	5.193	4.953	5.44	5.156	6.101	5.041	4.385	5.368	5.62	5.321	4.555	5.266	4.277	5.44	5.411	5.414	4.633	6.018	6.106	5.174
208156_x_at	EPPK1	3.741	3.835	3.472	3.022	3.176	2.883	2.848	3.181	3.507	3.097	3.497	3.299	3.257	3.392	3.236	2.921	3.323	3.483	2.812	2.862	3.24	3.137	2.816	3.141	2.516	2.994	3.199	3.205	3.532	3.915	4.037	3.489	3.057	2.826	2.506	3.278	3.543	3.376	2.607	3.175	2.727	3.543	3.762	3.131	3.232	3.042	3.27	3.147
232164_s_at	EPPK1	3.972	4.526	4.045	2.686	3.356	2.665	2.531	3.427	3.969	3.571	3.188	3.681	3.868	2.874	3.344	2.457	2.777	3.277	3.027	3.775	3.007	3.284	3.213	3.502	2.58	3.617	3.121	2.538	3.849	3.854	4.189	3.198	3.049	3.149	1.932	3.082	3.589	2.992	2.226	3.181	3.604	3.919	3.615	2.993	2.468	3.601	3.486	2.504
232165_at	EPPK1	4.487	5.029	4.933	3.346	4.083	3.761	2.771	3.92	4.945	4.5	4.001	3.955	4.156	3.513	3.418	3.348	4.508	3.749	3.708	4.795	3.906	4.873	3.744	4.175	3.512	4.026	4.617	3.966	4.674	5.103	5.428	4.664	4.904	3	2.78	3.868	3.529	3.275	2.637	3.741	2.833	4.548	4.434	3.765	3.212	4.39	4.668	3.749
234552_at	EPPK1	2.679	2.886	3.166	2.802	2.641	2.742	2.651	2.966	2.998	2.55	2.557	2.8	2.932	2.394	2.645	2.609	2.884	2.716	2.738	2.869	2.506	3.257	2.637	2.724	2.566	2.877	2.644	2.732	2.954	2.79	3.173	2.651	2.97	2.844	2.856	2.655	2.544	2.633	2.655	2.432	2.429	2.537	2.536	2.295	2.351	2.609	2.632	3.22
202609_at	EPS8	2.335	3.149	4.302	3.103	2.876	4.179	3.115	4.41	2.598	2.916	3.52	2.431	4.072	2.666	3.972	3.916	3.05	3.59	3.248	2.612	3.148	3.245	3.285	2.456	3.431	3.425	3.411	3.15	2.625	2.25	2.807	4.142	3.461	3.401	4.291	3.516	3.427	4.646	2.587	5.49	4.007	3.525	2.591	2.971	4.403	3.431	4.178	3.656
221665_s_at	EPS8L1	3.01	2.712	2.952	2.926	3.015	2.506	3.213	2.669	2.972	2.477	3.51	3.21	2.75	2.761	2.773	2.539	2.917	2.888	2.517	2.933	3.056	3.321	2.677	2.886	2.419	2.658	2.662	2.215	3.017	3.397	3.352	2.579	2.778	3.345	3.222	3.019	3.052	3.018	2.751	3.32	3.047	2.763	2.975	3.199	2.923	2.949	3.232	3.184
1555294_a_at	ERC1	3.918	3.534	3.776	4.477	3.031	3.302	3.66	4.935	4.596	3.407	3.527	4.312	4.729	4.36	3.677	4.138	3.339	3.937	4.348	3.513	4.841	3.362	3.904	4.54	4.442	3.193	4.086	4.396	3.519	3.587	3.439	3.298	4.345	4.532	3.298	3.857	3.953	3.165	3.734	3.708	3.968	2.996	3.252	4.038	3.323	3.934	3.306	3.916
1563947_a_at	ERC1	4.952	5.302	4.216	5.93	4.72	4.569	5.269	6.228	4.901	4.721	4.293	5.392	6.036	5.67	4.852	5.261	5.57	5.156	5.643	5.362	6.1	4.512	5.098	5.314	5.618	4.305	4.562	5.433	5.022	5.429	4.839	4.283	6.002	5.644	5.21	5.012	4.981	3.826	4.945	3.888	5.309	3.877	4.401	5.247	4.14	4.364	4.079	5.637
215606_s_at	ERC1	5.446	4.312	5.042	4.813	5.249	4.778	5.398	3.62	5.317	5.047	4.393	5.765	5.167	5.489	4.915	5.032	4.932	4.494	5.167	5.061	4.843	5.428	4.84	5.742	5.35	4.558	4.847	4.671	4.05	5.816	4.157	4.283	5.01	5.335	4.226	4.87	4.798	4.656	4.922	4.451	5.261	3.613	4.666	4.54	5.36	4.624	4.339	4.914
235215_at	ERCC4	4.074	4.279	5.039	4.534	5.003	5.446	4.329	4.91	4.789	5.121	4.928	3.322	5.014	4	5.105	4.534	4.227	5.113	4.886	4.4	4.509	4.476	4.516	3.281	4.192	5.225	4.535	4.356	4.657	4.164	3.956	5.239	3.956	4.436	5.475	4.922	5.039	4.963	5.237	5.385	4.126	5.77	4.211	4.371	5.137	5.135	5.24	4.794
232013_at	ERCC6L2	2.499	2.943	2.799	3.913	2.197	2.433	2.245	3.386	2.745	2.983	2.733	2.664	3.317	3.385	2.548	3.549	2.498	4.455	3.571	1.865	2.387	2.299	2.519	2.87	2.99	2.288	3.144	2.841	2.923	2.475	2.152	2.448	3.095	2.971	3.547	2.995	3.363	2.198	3.41	2.119	2.362	2.894	2.29	2.951	2.148	2.808	2.293	2.273
232801_at	ERCC6L2	2.175	2.046	2.511	2.561	2.054	2.292	2.145	2.699	2.182	2.338	2.113	2.202	2.434	2	2.148	2.181	2.309	2.352	2.194	1.892	2.003	2.16	2.006	2.339	2.012	2.127	2.352	2.447	1.845	2.12	2.022	2.017	2.177	2.899	2.137	2.19	2.359	2.206	2.152	1.889	2.221	2.113	1.956	2.027	2.412	2.36	2.228	2.06
226418_at	ERGIC2	2.916	2.687	2.918	3.456	3.017	3.242	2.445	2.916	2.839	3.211	3.908	2.985	3.066	2.533	2.821	2.871	3.262	3.161	2.808	2.561	2.679	3.088	2.482	2.734	2.938	3.502	2.72	3.066	2.854	2.729	2.975	2.846	2.762	3.038	2.888	2.768	3	3.048	3.084	2.968	2.579	3.489	2.739	2.983	2.636	3.229	3.19	2.947
213365_at	ERI2	3.56	3.342	3.707	3.633	3.811	4.547	4.075	4.295	3.815	4.42	4.473	2.988	4.103	3.509	4.149	4.051	3.629	4.215	4.075	4.107	4.204	3.983	3.553	3.397	3.9	4.156	4.118	3.586	3.873	3.285	3.548	4.695	3.256	4.032	4.968	4.168	4.36	4.991	4.457	4.403	3.658	4.961	3.371	3.87	4.314	4.309	4.567	3.775
240604_at	ERI2	2.022	2.142	1.905	1.92	1.986	2.038	2.135	1.866	1.89	1.894	2.329	2.479	1.869	1.774	1.996	1.923	2.071	1.955	1.773	1.946	1.883	2.091	1.743	2.077	1.73	2.006	1.979	2.092	1.95	2.157	1.849	1.702	2.151	1.817	2.155	2.115	1.841	2.133	1.698	2.177	2.487	2.002	1.949	2.054	2.034	2	1.887	2.027
1556357_s_at	ERICH1	1.927	2.606	1.785	2.287	2.02	2.877	2.152	1.721	2.22	1.876	1.947	2.467	2.209	2.149	2.016	2.211	1.864	2.14	2.133	2.129	2.023	1.826	2.184	1.837	2.263	2.016	1.535	2.301	2.193	1.886	2.016	2.274	2.245	2.076	2.086	1.903	2.25	2.029	2.052	1.983	2.06	2.153	2.077	1.659	1.885	1.791	1.866	2.032
1558371_a_at	ERICH1	6.818	6.743	6.421	7.19	6.761	5.954	6.689	7.534	5.26	6.111	5.41	6.117	7.006	7.777	6.149	5.927	6.933	5.619	7.148	5.916	4.566	5.565	6.006	4.786	7.755	6.332	6.623	5.256	6.794	6.612	6.788	5.897	7.081	6.396	6.624	5.46	5.079	4.342	7.308	5.666	4.87	5.074	4.36	7.396	6.128	5.02	5.646	7.08
217611_at	ERICH1	4.144	4.245	3.691	4.805	4.18	3.809	3.828	4.196	3.919	4.326	3.772	5.15	4.361	5.828	3.32	4.941	4.131	4.203	4.713	3.983	4.151	4.059	3.692	4.882	5.377	3.59	4.183	4.308	4.044	4.287	4.351	3.963	4.65	4.383	3.626	3.762	4.171	3.985	4.191	3.876	4.908	3.543	4.043	4.444	3.8	3.834	4.047	4.231
236467_at	ERICH1	5.456	4.912	5.193	4.672	5.427	4.216	4.982	5.079	4.064	4.936	4.289	3.817	4.968	5.319	5.282	3.739	5.278	4.058	5.308	4.805	5.043	5.09	4.9	3.969	5.213	3.804	5.587	5.375	5.09	4.641	6.267	5.193	4.992	3.63	4.5	4.616	4.026	4.986	5.231	4.809	4.972	5.45	4.821	5.264	4.78	4.288	4.849	4.914
242003_at	ERICH1	1.872	1.832	1.863	2.253	1.885	1.857	2.272	2.295	2.056	2.631	2.051	2.04	2.145	1.919	1.958	2.519	2.025	2.07	2.138	1.896	2.152	2.168	2.188	1.826	2.132	2.206	2.173	1.988	1.945	1.858	1.852	2.138	1.868	2.219	2.289	1.982	2.346	2.072	1.985	1.751	2.41	2.058	1.812	2.066	2.286	3.085	2.264	2.151
244452_at	ERLEC1	2.34	2.287	2.315	2.28	2.043	2.252	2.331	2.378	2.189	2.389	2.533	1.919	2.363	2.357	2.456	2.416	2.409	2.338	2.137	1.9	2.208	2.087	2.514	2.144	2.336	2.49	2.198	2.502	2.763	2.491	2.193	2.356	2.193	2.389	2.3	1.957	2.758	2.587	2.988	2.448	2.379	2.277	2.574	2.308	2.472	2.44	2.407	2.175
220012_at	ERO1B	3.141	5.102	4.871	4.057	3.523	4.917	4.577	3.955	4.365	5.224	4.8	3.637	5.308	4.885	4.381	4.572	5.111	4.494	5.637	3.662	4.455	4.43	5.228	4.374	4.646	5.762	4.551	4.927	3.945	4.949	3.725	5.622	4.845	4.753	4.859	4.379	3.714	4.369	4.338	4.196	4.659	4.887	3.929	3.743	4.521	4.494	4.193	4.428
231944_at	ERO1B	4.55	5.184	5.399	5.295	5.324	6.375	4.809	4.958	4.61	6.504	6.173	4.176	5.156	4.597	5.656	5.037	5.575	5.73	5.483	5.716	4.978	5.586	5.115	4.29	5.505	6.172	5.609	5.189	4.935	4.587	4.919	5.911	4.259	5.48	6.302	5.553	5.579	5.635	6.464	5.796	4.569	6.5	4.227	4.97	5.761	5.709	6.397	5.428
222139_at	ERV3-2	6.631	6.64	4.717	6.631	6.455	7.559	6.793	5.634	5.981	7.012	5.178	5.615	6.372	5.469	6.895	6.269	7.546	5.351	7.193	6.729	6.155	5.361	6.487	6.23	6.681	5.113	7.735	6.467	7.208	4.027	6.664	6.614	5.579	6.601	8.121	6.017	6.874	7.247	7.482	6.082	6.602	7.209	4.613	5.428	6.441	6.642	7.265	5.433
240808_at	ESD	3.703	3.235	3.605	2.83	3.642	2.888	2.891	3.022	3.415	3.357	3.831	3.852	3.098	3.472	3.203	3.48	3.348	3.079	3.044	2.887	3.106	2.804	3.042	3.801	2.971	3.289	3.753	2.791	3.253	3.163	3.281	3.085	2.857	2.633	2.733	3.365	3.481	3.845	3.35	3.302	3.699	3.402	3.63	3.961	2.979	3.313	3.331	3.643
1555256_at	EVC2	2.485	2.654	2.511	2.652	2.385	2.324	2.53	1.802	2.223	2.366	2.732	2.532	2.709	2.514	2.208	2.336	2.122	2.511	2.514	2.531	2.281	2.624	2.461	2.605	2.165	2.357	2.366	2.179	2.944	2.479	2.885	2.254	2.587	2.194	2.742	2.609	2.541	2.291	2.394	2.347	2.556	2.373	2.52	2.551	2.413	2.976	2.429	2.395
229974_at	EVC2	1.882	1.765	1.739	1.982	2.362	1.935	2.181	2.008	1.678	2.044	2.079	1.764	1.975	1.896	2.388	2.243	1.881	2.105	1.73	2.104	1.875	1.895	2.356	2.049	2.012	1.775	2.256	1.839	2.069	1.827	1.901	2.129	1.761	1.772	3.444	2.188	2.414	2.197	2.403	2.056	2.41	2.352	2.163	1.65	1.98	2.211	2.031	2.255
208297_s_at	EVI5	3.754	4.01	3.14	3.982	2.783	3.111	3.043	4.042	3.257	4.336	3.133	3.348	3.582	5.38	2.485	4.488	4.095	4.751	5.354	3.435	4.65	2.894	2.724	4.775	5.102	2.681	3.727	4.314	3.382	3.334	2.8	2.602	5.202	4.666	3.951	3.533	4.174	3.148	3.399	2.924	4.706	2.274	2.736	4.378	2.645	2.971	2.836	3.93
208298_at	EVI5	1.987	1.805	1.981	1.542	1.655	1.791	1.696	1.758	1.777	1.668	2.022	2.085	1.805	1.712	1.691	1.776	1.523	1.501	1.85	1.56	1.685	1.821	1.872	1.816	1.635	1.524	1.584	2.166	1.876	2.16	2.32	2.033	1.466	1.557	1.468	2.229	2.183	1.769	1.94	2.197	1.811	1.87	1.98	1.963	1.689	1.642	2.145	1.533
210012_s_at	EWSR1	2.587	2.598	2.56	3.77	2.376	2.452	2.614	2.663	2.656	2.746	2.573	2.687	2.633	2.946	2.427	3.022	2.451	3.61	3.027	1.943	2.253	2.029	2.059	2.735	2.532	2.107	2.21	2.961	2.398	2.746	2.181	1.993	2.734	2.663	2.781	2.382	3.046	2.304	3.152	2.318	2.504	2.556	2.537	2.738	2.459	2.989	2.162	2.774
229966_at	EWSR1	7.609	7.967	7.283	8.161	6.594	5.631	7.227	8.212	6.319	7.612	7.024	7.473	8.052	8.131	6.15	7.623	6.316	7.752	7.662	7.051	7.865	6.487	6.781	7.764	8.282	7.552	7.528	8.073	7.137	7.8	6.696	6.159	8.264	7.745	7.165	6.931	7.261	5.409	7.36	5.733	7.823	5.251	5.941	7.276	7.164	5.92	5.629	7.493
232599_at	EXOC6	4.522	3.256	3.868	3.801	3.899	3.684	4.506	4.261	3.828	3.325	3.645	4.349	4.103	3.576	3.645	3.559	4.047	3.081	3.926	3.201	3.453	3.824	3.815	3.821	4.062	4.407	3.359	4.248	4.07	3.716	3.711	4.512	3.961	3.317	2.527	3.692	3.577	3.707	3.482	4.177	3.481	3.787	4.13	3.472	3.818	3.182	3.274	2.825
233924_s_at	EXOC6	3.929	4.034	4.39	4.874	3.616	4.652	4.009	4.537	4.025	4.865	4.962	4.693	4.311	3.714	4.323	4.41	4.2	4.623	4.759	3.5	4.358	3.482	3.632	3.731	3.702	5.048	4.758	3.426	4.023	3.792	3.141	4.163	3.438	4.434	4.826	4.654	4.471	4.935	4.798	3.8	4.252	4.586	4.146	3.776	4.465	4.593	3.523	4.32
1559044_at	EXOSC1	4.165	4.112	4.455	4.839	3.569	3.893	4.14	5.362	3.578	4.487	4.366	3.858	4.973	5.022	3.69	4.375	3.258	4.53	4.747	3.423	3.682	3.381	3.53	4.113	4.603	5.316	3.995	4.063	3.782	3.411	3.133	3.517	5.111	3.662	4.007	3.52	3.788	2.793	4.047	2.79	4.293	3.761	3.095	3.619	4.114	3.776	3.172	3.361
218369_s_at	EXOSC1	2.05	1.646	2.376	2.031	1.9	2.274	2.644	2.253	2.25	1.971	2.354	2.464	2.21	2.133	2.064	1.97	1.766	2.056	2.018	2.147	2.144	2.103	1.998	1.798	2.349	2.452	2.029	1.835	2.451	2.16	2.538	2.122	2	2.641	2.159	2.135	1.948	2.289	2.284	2.254	2.153	2.189	2.403	2.406	2.281	2.293	2.489	2.22
227912_s_at	EXOSC3	3.484	3.502	3.118	2.751	3.289	4.077	3.001	3.286	3.195	3.397	3.244	3.054	3.15	3.003	3.017	3.135	2.936	3.323	3.222	2.962	3.314	3.187	3.709	2.97	3.701	3.729	3.595	3.251	3.414	3.241	3.027	3.442	3.078	3.563	3.035	3.598	3.514	3.444	3.194	3.509	2.804	3.833	3.035	3.663	3.222	4.205	3.91	3.156
227913_at	EXOSC3	2.333	2.381	2.266	2.332	2.256	2.959	2.505	2.273	2.225	2.365	2.787	2.745	2.764	2.597	2.547	2.299	2.847	2.394	2.527	2.808	2.412	2.689	2.876	2.803	3.013	2.422	2.679	2.395	2.459	2.954	2.58	2.609	2.49	2.803	2.663	2.574	2.146	2.633	2.347	2.851	2.592	2.3	2.669	2.871	2.424	3.522	2.486	2.423
214985_at	EXT1	2.769	2.91	3.321	3.641	2.889	2.983	3.018	3.97	3.099	3.126	3.18	3.317	3.807	3.19	2.509	3.469	3.173	3.301	3.122	2.919	2.842	2.657	3.189	2.912	3.22	2.845	2.909	3.222	2.566	3.115	3.025	2.722	3.362	2.695	2.649	3.292	2.656	2.467	2.511	2.764	2.688	2.704	2.661	3.02	2.866	2.842	2.748	3.172
209537_at	EXTL2	3.651	4.245	4.742	4.701	4.703	4.948	4.112	4.792	4.425	5.124	4.925	3.763	4.363	4.202	4.525	4.722	4.064	5.498	4.775	4.885	4.537	4.747	4.364	4.605	4.458	5.16	4.639	3.999	4.218	4.475	3.875	4.873	3.744	4.548	5.545	5.339	5.296	4.805	5.543	4.991	4.347	5.815	3.634	4.202	4.963	5.459	5.498	3.948
203358_s_at	EZH2	4.197	4.505	4.886	5.178	4.695	5.655	5.435	5.202	5.094	4.865	3.711	3.959	4.72	4.279	5.948	5.323	4.466	4.758	4.552	4.932	4.369	4.606	5.211	4.582	4.943	4.782	4.682	4.078	4.912	3.784	4.171	5.141	4.97	5.125	7.011	5.183	5.945	4.988	5.796	5.405	4.829	5.8	5.328	4.64	5.307	5.682	5.626	4.828
206429_at	F2RL1	4.11	3.529	3.352	3.138	3.458	2.881	3.34	3.385	3.555	3.703	4.023	4.259	3.676	3.539	3.763	3.525	3.393	3.355	4.427	3.334	3.555	3.068	3.512	3.608	3.205	3.916	4.535	3.959	3.555	3.429	3.451	3.24	3.149	3.516	3.758	3.27	3.368	3.956	3.885	3.23	3.696	3.483	3.661	3.717	4.17	3.632	3.109	4.002
213506_at	F2RL1	8.407	8.359	7.796	7.804	8.223	7.423	7.748	7.143	7.132	8.457	8.766	8.27	8.79	7.679	8.513	7.077	8.855	7.371	9.226	7.344	8.167	8.168	6.403	7.293	6.128	8.473	8.953	7.764	8.751	6.698	7.751	7.448	7.251	7.352	7.784	7.701	7.174	9.116	8.005	7.1	7.959	7.949	6.92	7.122	8.838	7.326	7.77	8.804
205756_s_at	F8	5.103	4.943	4.053	5.225	5.005	5.337	4.74	5.013	4.446	5.517	5.303	5.373	4.341	4.164	5.054	5.507	5.452	4.974	4.835	4.391	4.637	5.116	4.782	4.242	5.074	5.229	4.63	4.673	4.65	4.45	4.485	5.157	3.777	5.013	6.296	6.528	6.365	6.171	6.05	6.534	4.988	5.669	5.082	4.377	5.78	5.361	5.598	5.775
202345_s_at	FABP5	3.279	3.72	3.405	4.477	4.094	5.618	4.646	4.235	4.077	4.272	4.371	3.563	4.06	3.846	5.272	4.642	4.195	3.844	4.02	4.571	4.595	3.895	4.137	3.868	4.984	4.872	4.005	4.059	3.635	3.566	3.708	4.031	3.949	3.9	7.211	4.12	4.794	4.709	6.077	5.693	4.363	4.8	4.535	4.248	4.786	6.163	5.783	4.769
229196_at	FAM111A	2.226	2.275	2.225	2.217	2.351	2.479	2.003	2.464	2.467	2.027	2.066	2.633	2.506	2.476	2.136	2.605	2.506	2.619	2.57	2.397	2.565	3.129	1.895	2.687	2.144	1.833	2.447	2.688	2.401	2.72	2.272	2.089	2.705	2.1	2.911	2.872	2.565	2.229	2.95	2.124	2.732	2.335	2.196	2.331	1.923	2.49	2.22	2.078
1555944_at	FAM120A	4.471	4.23	4.726	4.412	3.637	3.854	3.971	4.528	3.671	4.701	4.296	4.094	4.295	4.303	3.433	4.457	4.631	4.226	4.859	3.359	4.15	3.755	4.204	4.915	4.851	4.619	4.102	4.454	4.133	3.904	3.861	3.35	4.621	4.671	4.25	4.144	4.379	2.88	4.075	3.584	4.208	3.671	4.179	4.606	3.916	4.141	3.329	4.008
1555947_at	FAM120A	2.954	2.714	2.175	2.304	1.91	2.239	1.985	2.332	2.233	3.247	2.283	2.006	2.751	2.347	2.411	1.999	2.512	2.271	2.895	2.233	2.741	2.054	2.375	2.134	2.633	2.58	2.484	1.926	3.09	1.724	1.892	2.759	2.495	2.752	2.736	2.491	2.255	2.128	2.18	1.849	1.973	1.983	1.461	2.064	2.386	2.066	1.936	2.827
210516_at	FAM120A	1.71	1.544	1.751	1.916	1.759	1.892	1.951	1.555	1.666	1.991	1.897	1.964	1.795	1.699	1.608	1.815	1.889	2.029	1.829	2.03	2.083	2.112	1.963	1.97	1.92	2.018	2	2.019	2.195	1.858	2.003	1.789	1.883	1.769	1.64	1.491	1.845	1.824	1.829	1.931	1.648	1.765	1.971	1.689	1.831	1.986	1.701	1.984
1552322_at	FAM122C	2.112	1.986	2.105	2.31	2.02	2.098	1.666	1.954	1.967	2.377	1.863	1.602	1.934	1.919	1.832	1.869	1.76	2.183	1.905	2.012	1.944	2.077	2.013	1.997	2.018	2.075	1.883	1.919	1.943	1.926	2.077	1.892	1.986	1.785	2.153	2.069	2.006	2.705	2.018	1.856	1.947	2.124	2.039	1.931	2.07	1.983	2.48	1.823
1552323_s_at	FAM122C	2.886	3.041	3.581	3.884	2.815	4.302	3.439	3.72	3.546	4.222	3.034	2.907	3.156	3.467	3.08	3.22	3.707	3.449	3.73	3.131	2.881	3.551	3.912	2.784	2.686	3.448	3.59	2.642	3.271	2.578	2.85	3.559	2.785	4.292	4.184	3.828	4.346	4.444	3.591	3.651	3.57	4.679	2.56	2.928	3.59	2.923	4.539	2.566
232806_s_at	FAM131A	4.628	4.19	4.421	4.407	4.089	3.686	4.583	4.304	4.198	3.558	4.259	4.731	4.911	4.199	4.243	4.145	4.619	4.632	4.101	4.751	4.758	4.415	4.546	4.524	4.556	4.231	4.123	4.905	5.013	5.59	5.6	4.14	4.257	4.044	3.547	3.696	3.956	3.752	4.156	4.049	4.627	4.188	4.98	4.24	4.214	3.754	3.802	4.237
1569025_s_at	FAM13A	2.194	1.985	2.279	1.818	2.013	1.914	2.232	1.868	2.121	1.557	2.007	2.198	1.849	2.09	1.866	1.973	2.052	2.013	1.908	2.071	2.153	2.306	1.931	2.051	2.033	2.335	2.303	2.149	1.864	1.969	2.301	1.851	1.876	2.282	2.239	1.91	2.07	1.81	1.991	2.143	2.333	2.068	2.104	2.132	1.779	1.99	2.204	1.912
243020_at	FAM13A-AS1	4.975	5.425	4.822	5.23	4.599	5.499	4.868	4.819	5.374	4.525	5.319	4.377	5.922	4.535	4.636	4.066	5.344	5.271	4.298	5.384	4.604	4.909	4.137	5.069	5.163	5.648	5.428	4.785	5.628	4.658	5.033	5.556	4.725	4.33	4.737	4.887	4.532	5.825	4.993	5.043	4.893	5.157	5.534	4.87	5.299	4.285	4.989	4.898
235022_at	FAM210A	2.883	3.001	3.375	3.447	3.383	4.111	2.942	3.616	2.983	3.623	3.429	2.45	3.621	2.796	3.573	3.497	3.389	4.335	3.238	2.94	3.604	3.646	3.42	2.884	3.065	3.964	3.278	3.8	3.279	2.994	2.895	3.245	3.051	3.401	4.434	3.825	3.758	4.164	4.239	4.346	2.899	4.437	3.065	2.811	4.136	4.082	4.359	3.2
242149_at	FAM210A	3.296	3.072	3.478	3.008	2.461	3.515	3.108	3.094	2.87	3.505	3.253	3.265	2.726	2.596	3.208	2.88	3.085	3.542	2.976	2.612	2.805	2.733	3.266	2.622	2.747	3.759	3.113	2.991	2.995	3.055	2.77	3.006	2.803	3.265	3.255	2.979	3.438	3.127	3.155	3.343	2.882	3.583	2.696	2.757	3.741	3.158	3.123	2.88
235193_at	FAM214A	3.668	3.983	3.693	4.056	3.975	3.647	3.18	3.899	3.724	4.761	4.726	3.544	3.879	3.926	3.794	3.529	3.516	5	3.869	3.015	3.958	3.536	2.501	3.553	3.614	4.034	3.898	3.759	3.824	3.611	2.715	3.233	3.073	3.875	4.239	3.61	4.639	4.091	3.801	3.812	3.777	4.104	2.696	3.876	4.016	4.174	2.621	3.376
216897_s_at	FAM76A	2.944	2.431	2.933	2.742	3.095	3.06	2.472	2.79	2.649	2.92	3.009	2.964	2.546	2.892	2.916	2.936	2.627	2.948	2.65	2.851	2.785	2.415	2.386	2.69	2.879	2.607	2.965	2.683	2.771	3.425	2.899	2.72	2.843	2.856	3.159	2.89	2.984	2.467	2.961	3.094	3.318	3.22	3.257	3.241	2.713	3.08	2.75	2.862
228604_at	FAM76A	3.291	3.452	3.863	3.622	3.925	4.286	3.502	3.942	3.885	4.321	3.623	1.546	3.839	3.329	4.272	3.962	3.756	3.785	4.128	3.958	3.606	3.386	3.654	3.196	3.68	4.42	3.937	3.722	3.749	2.749	3.751	3.713	3.496	3.943	4.271	3.749	3.775	3.738	4.011	3.596	3.573	4.45	3.047	2.76	4.435	3.665	4.055	3.813
228638_at	FAM76A	5.359	4.584	5.638	5.5	5.852	5.922	6.119	5.674	4.858	5.832	5.431	3.761	5.108	5.416	5.44	5.59	5.385	5.718	5.819	5.818	4.8	6.113	5.278	4.621	5.001	5.85	5.193	5.485	5.485	5.278	4.73	6.604	5.369	5.512	5.973	6.021	5.783	5.189	6.132	5.214	5.453	5.296	4.049	5.39	5.966	6.154	5.001	5.046
1553749_at	FAM76B	2.518	2.622	2.965	2.625	2.633	3.178	2.991	3.091	3.075	3.443	2.788	2.494	2.643	2.802	3.181	2.786	3.534	3.087	2.502	2.784	2.494	2.523	2.835	1.862	2.944	2.584	2.828	2.581	2.685	2.358	2.552	2.985	2.703	3.163	3.745	2.64	2.507	2.721	2.649	2.44	2.915	3.122	2.616	3.131	2.621	5.951	2.646	2.571
1553750_a_at	FAM76B	2.375	2.639	2.772	2.472	2.621	2.975	2.582	2.637	2.484	3.029	2.262	2.704	2.748	2.778	2.77	2.993	2.263	3.585	3.136	2.7	2.303	2.689	2.232	2.732	3.156	2.797	2.978	2.897	2.707	2.212	2.36	2.641	3.353	2.519	3.889	2.59	3.436	2.702	4.009	2.302	2.57	2.679	2.359	2.732	2.308	3.285	2.45	2.414
226753_at	FAM76B	5.465	6.443	6.668	6.623	6.371	8	6.485	6.823	5.895	7.825	7.824	5.461	6.994	6.308	6.771	6.975	7.023	7.451	7.235	7.051	7.126	7.136	6.875	6.217	6.616	7.858	7.018	6.416	6.267	6.509	6.224	7.46	5.821	6.602	7.808	7.099	7.449	7.222	7.1	7.257	5.967	8.222	5.592	6.047	7.274	7.557	7.661	6.852
238460_at	FAM83A	2.401	2.174	2.318	2.357	2.661	2.125	2.656	2.268	2.261	2.332	2.669	2.757	2.64	2.198	2.168	2.312	2.514	2.15	2.1	2.11	2.276	2.974	2.4	2.645	2.233	2.019	2.422	2.519	2.311	3.051	2.493	2.554	2.491	2.315	2.114	2.358	2.738	2.601	2.17	2.572	2.435	2.281	2.816	2.285	1.978	5.459	2.598	2.273
238741_at	FAM83A	3.138	3.327	3.321	2.853	3.063	2.877	3.372	2.953	3.12	3.01	3.262	3.546	3.096	3.357	2.948	3.326	3.102	3.001	3.425	3.253	3.457	3.286	3.267	3.583	2.889	2.671	3.184	3.369	2.968	3.638	3.433	3.327	3.312	2.866	3.396	3.39	3.537	2.863	3.088	3.377	3.482	2.802	3.474	3.283	2.983	4.927	3.529	3.037
228011_at	FAM92A	2.34	2.386	2.365	2.349	2.449	3.108	2.387	2.888	2.487	2.721	2.792	2.314	2.534	2.193	2.617	2.344	2.423	2.446	2.379	2.462	2.366	2.22	2.488	2.631	2.338	2.686	2.498	2.24	2.249	2.367	2.446	2.483	2.309	2.806	3.116	2.801	2.493	3.339	2.824	2.931	2.663	2.825	2.263	2.381	2.629	3.289	2.909	2.512
235391_at	FAM92A	1.829	2.08	2.02	1.902	1.907	2.373	1.981	2.022	1.919	2.16	2.126	1.987	2.183	1.811	2.073	1.869	2.626	2.023	1.884	2.161	1.999	1.763	2.287	1.838	2.236	2.284	2.023	1.662	1.908	2.124	2.007	2.353	2.043	2.202	2.701	2.24	2.098	2.998	2.217	2.132	2.406	2.182	2.126	2.073	2.109	2.198	2.329	1.735
237910_x_at	FAM92A	2.045	1.899	1.831	2.13	2.093	1.962	1.996	1.888	1.706	2.315	1.96	2.432	1.877	2.221	1.829	2.248	1.924	2.089	2.133	1.732	2.056	2.476	1.93	2.189	2.151	1.957	2.262	2.094	1.913	1.989	1.946	1.824	2.041	1.779	1.965	1.914	2.038	1.983	2.222	1.767	2.322	1.987	1.971	2.561	1.941	2	1.805	2.11
241832_at	FAM98A	3.565	4.187	4.317	4.864	4.727	4.04	4.117	5.016	4.009	4.398	4.586	4.143	4.745	4.609	3.926	4.062	4.165	4.266	4.361	4.08	3.627	4.272	3.977	3.923	4.517	4.693	4.564	4.468	4.251	3.854	3.974	4.488	4.762	4.923	4.703	3.727	4.622	3.351	3.75	4.165	3.51	3.512	3.866	4.196	3.849	4.092	3.126	3.765
236976_at	FANCA	2.619	2.323	2.185	2.36	1.995	2.233	2.334	2.431	2.462	2.471	2.122	2.744	2.316	2.479	2.835	2.441	2.174	2.479	2.286	2.292	2.551	2.689	2.144	2.35	2.474	2.806	2.885	1.862	2.103	2.65	2.501	2.238	2.449	2.134	2.089	2.207	2.83	2.464	2.246	2.216	2.06	2.403	2.593	2.329	2.295	2.395	2.597	2.042
213007_at	FANCI	3.908	3.765	4.762	4.727	4.068	4.671	4.86	4.986	4.865	4.971	3.86	3.789	4.602	4.116	5.921	5.152	4.58	5.021	4.712	4.69	4.338	4.621	4.952	4.729	4.256	4.257	4.512	4.71	4.337	3.49	4.272	4.928	4.79	4.71	6.34	5.354	5.105	4.682	5.344	4.942	4.788	5.393	4.952	4.725	5.25	5.461	5.079	4.064
1554277_s_at	FANCM	1.971	2.577	2.088	2.237	1.994	2.222	1.937	2.749	2.214	2.596	2.109	2.132	2.269	2.66	1.77	2.702	1.79	3.016	3.088	2.299	1.991	2.639	1.906	1.853	3.068	1.994	2.387	2.676	2.025	1.636	1.77	1.695	1.646	2.75	3.331	1.699	2.202	1.816	2.717	1.82	2.501	1.839	1.806	2.23	2.017	2.79	1.826	2.068
234733_s_at	FANCM	2.967	3.177	3.7	3.524	3.114	4.197	3.007	4.161	3.23	3.512	3.484	3.13	3.014	3.335	3.519	3.536	3.335	3.904	3.546	3.513	3.003	3.427	3.581	3.095	3.008	4.274	3.688	3.157	3.542	3.378	3.397	3.76	3.403	3.008	4.043	3.37	3.815	3.779	4.137	3.748	3.406	4.051	3.094	3.184	3.709	3.555	3.84	3.093
242711_x_at	FANCM	3.108	3.36	4.006	3.669	3.381	3.829	3.365	4.107	3.819	3.973	3.923	2.987	3.845	3.722	3.694	3.849	4.005	4.005	3.93	4.06	3.619	3.568	3.541	3.61	3.822	4.307	3.663	3.571	2.953	3.704	3.361	3.877	3.702	3.79	4.065	3.822	3.839	3.628	3.897	4.049	3.296	4.675	3.006	3.458	4.056	3.729	3.952	3.157
1558014_s_at	FAR1	3.943	3.155	3.882	4.78	2.629	4.201	3.177	3.84	3.427	4.611	4.195	2.667	4.014	3.221	4.161	3.779	4.129	3.874	4.296	3.139	3.87	3.182	2.847	2.123	2.84	4.586	4.309	3.44	3.97	2.25	2.453	4.586	2.815	4.143	4.952	3.588	3.959	4.426	5.005	3.157	3.235	4.209	2.133	2.936	3.989	3.752	3.508	3.328
239108_at	FAR2	4.598	5.802	6.256	5.792	5.599	6.402	6.1	5.651	5.462	6.316	5.955	4.774	6.153	4.934	5.51	5.093	5.941	5.643	6.329	5.218	6.157	5.187	5.251	4.455	5.196	6.246	5.66	5.259	5.86	4.151	5.093	6.023	4.759	5.838	6.203	5.713	5.079	6.459	5.403	5.816	4.866	5.801	4.674	5.547	5.99	5.194	5.554	5.322
242857_at	FARP2	4.738	3.722	4.446	4.36	4.728	4.177	4.577	5.27	3.861	3.91	4.824	3.946	4.677	4.368	4.213	4.619	4.963	4.169	4.791	4.619	4.198	4.268	5.308	5.253	4.641	4.296	3.571	4.365	4.694	4.604	5.268	4.625	4.73	4.638	4.27	5.077	5.397	5.097	5.276	5.525	4.852	4.96	5.034	4.086	4.457	4.363	4.771	4.074
223036_at	FARSB	1.977	1.749	1.953	2.084	1.798	2.029	2.303	2.135	1.993	1.874	1.786	2.099	1.878	1.933	1.863	2.603	1.859	2.043	1.76	1.827	2.054	1.602	1.894	2.192	1.918	2.141	2.116	1.893	1.95	2.123	2.267	2.382	2.197	2.208	2.108	1.904	2.099	1.916	2.025	1.934	2.055	2.255	2.023	1.849	2.127	1.923	2.001	1.828
232063_x_at	FARSB	3.618	4.005	4.015	4.582	4.504	4.3	3.438	4.509	4.626	4.702	4.662	2.957	4.352	4.051	3.16	4.496	4.144	4.883	4.544	3.908	3.801	4.217	4.337	3.833	4.835	5.558	4.089	3.378	2.583	3.702	3.011	3.995	3.829	3.912	4.172	3.771	3.31	3.797	3.839	3.165	4.121	3.27	2.311	3.997	3.942	4.05	4.238	4.005
210865_at	FASLG	3.609	3.051	5.109	4.203	4.365	4.52	3.904	4.193	4.625	5.302	4.418	3.778	4.569	3.926	4.427	4.97	4.203	5.678	4.641	4.591	4.525	5.354	4.03	4.044	3.705	5.069	4.465	4.119	3.901	3.566	3.308	4.982	4.075	4.864	6.014	5.147	5.203	4.294	5.771	4.367	4.579	5.798	4.358	3.892	5.695	5.447	4.767	4.449
211333_s_at	FASLG	3.835	3.1	4.277	3.833	4.18	3.705	2.934	4.062	4.224	4.729	3.621	3.576	4.035	3.755	3.747	4.225	3.631	5.156	4.021	3.367	3.934	3.672	3.773	3.605	3.235	4.416	4.154	3.466	3.697	3.358	3.048	3.954	3.817	4.092	5.177	4.779	4.294	3.663	4.931	3.737	3.888	4.8	4.102	3.556	4.318	5.064	4.085	3.642
219002_at	FASTKD1	4.886	5.626	5.858	6.19	6.275	7.4	5.705	6.172	5.73	6.581	6.617	4.718	5.494	5.383	6.583	5.957	5.839	6.366	6.116	5.873	6.083	6.151	5.903	5.263	5.804	6.384	6.533	5.692	5.378	5.358	5.954	6.545	5.517	5.891	7.261	6.231	6.64	6.578	6.958	6.527	5.39	7.085	5.616	5.542	6.328	6.578	6.849	5.812
205976_at	FASTKD2	3.377	4.092	4.598	4.113	4.221	5.073	3.716	4.381	4.034	4.825	5.013	3.248	3.992	4.104	4.58	4.408	3.899	4.703	4.435	3.488	3.598	4.12	3.753	3.39	3.868	5.211	4.495	3.629	3.147	3.849	3.521	3.96	3.411	3.943	5.154	4.375	4.565	4.578	4.925	4.793	3.39	5.803	3.735	3.789	4.92	4.637	4.94	4.046
220751_s_at	FAXDC2	7.196	9.048	9.135	7.432	10.036	6.883	7.278	7.514	9.731	8.723	7.651	9.982	6.901	8.629	6.952	8.748	8.217	7.794	7.698	7.884	9.407	8.224	9.652	8.806	8.113	6.303	8.747	8.374	7.672	8.173	7.833	8.111	7.618	5.897	6.884	7.735	9.03	8.339	6.736	8.823	7.997	7	8.509	9.967	7.461	10.134	9.592	9.606
48031_r_at	FAXDC2	6.944	8.467	8.699	7.345	9.476	6.985	7.117	7.253	9.107	8.172	7.198	8.906	6.618	8.105	7.076	7.954	7.543	7.272	7.427	7.618	8.858	7.693	9.079	7.965	7.788	6.139	7.823	7.663	7.501	7.126	7.118	7.861	7.518	5.833	6.986	7.225	8.051	7.546	6.515	7.717	7.095	6.737	7.656	9.078	7.339	8.89	8.76	9.015
233087_at	FBXL17	3.291	4.392	3.646	4.415	3.742	3.302	3.417	5.195	3.946	4.31	3.853	3.238	4.351	4.625	3.838	4.819	4.191	4.623	4.607	4.289	3.667	3.689	4.167	4.185	5.441	4.233	3.31	4.457	3.556	3.451	3.34	3.497	4.307	4.562	4.72	3.228	3.571	2.833	3.474	3.243	3.719	3.617	2.669	3.577	3.731	3.484	3.442	3.534
238174_at	FBXL17	1.891	1.87	2.741	1.918	2.136	3.379	1.898	2.783	1.856	2.934	2.874	1.919	2.313	1.867	2.05	1.871	2.405	2.224	2.018	2.001	2.091	2.234	2.058	1.646	2.292	2.875	2.559	2.063	2.368	2.282	1.819	2.573	2.13	1.831	3.399	3.1	2.967	3.026	2.934	2.4	2.089	3.369	1.885	1.875	2.659	2.41	2.275	2.391
242034_at	FBXL17	2.084	2.162	2.024	2.168	1.935	1.974	1.606	2.278	2.045	2.286	2.176	2.183	2.179	1.986	2.024	1.862	2.301	1.962	1.889	1.98	1.873	2.268	2.255	1.926	1.648	1.67	2.233	2.175	2.146	2.579	1.909	2.13	2.141	1.888	1.872	2.097	2.062	2.322	2.084	2.098	2.187	2.303	2.135	2.198	2.028	2.061	2.046	1.826
244360_at	FBXL17	3.26	3.8	3.876	3.831	3.467	3.628	3.574	4.096	3.813	3.896	3.673	3.082	3.58	3.206	3.656	3.81	3.485	3.967	4.359	3.058	3.235	3.475	3.353	3.411	3.029	3.921	3.953	3.421	3.481	3.501	3.281	3.273	3.49	3.61	3.774	3.562	3.618	3.602	3.996	3.25	3.421	3.525	2.785	3.438	3.389	3.721	3.179	2.979
219189_at	FBXL6	4.11	4.161	4.372	3.997	4.082	3.79	4.713	4.256	4.279	4.162	3.228	3.946	4.341	4.266	4.16	4.52	4.189	4.571	4.114	4.395	4.322	3.71	4.799	4.025	4.31	4.172	4.448	4.473	4.026	4.578	4.997	3.328	4.633	4.444	3.974	4.53	5.424	3.993	5.18	4.739	4.324	4.427	4.798	3.943	4.748	4.092	3.748	4.767
1555972_s_at	FBXO28	1.931	2.126	2.196	2.036	1.881	1.878	1.804	2.15	2.019	2.118	2.023	2.034	1.948	1.869	2.136	2.113	2.119	2.318	1.946	1.72	2.011	2.201	2.103	2.069	1.859	1.999	1.92	2.04	2.178	1.973	2.016	2.346	1.841	2.439	2.456	2.461	2.348	2.096	2.428	1.919	2.325	2.129	2.175	1.866	2.175	2.248	2.525	2.165
218432_at	FBXO3	5.331	5.325	6.066	5.717	5.463	6.604	5.323	5.854	5.675	6.706	6.233	4.623	5.633	5.088	6.085	5.859	5.324	6.076	6.109	5.256	5.416	5.764	5.168	4.368	4.883	6.246	5.815	5.301	5.616	5.376	4.924	5.772	5.374	5.562	6.776	5.802	6.031	6.195	6.619	5.781	5.07	6.871	4.817	5.029	6.027	6.265	6.354	5.358
229955_at	FBXO3	3.677	3.961	4.489	4.554	4.555	5.14	3.858	4.383	4.266	4.505	4.706	3.946	3.973	3.81	4.983	4.56	4.481	4.715	4.287	3.683	3.547	4.581	4.893	4.084	4.56	4.683	4.719	3.986	4.302	3.835	3.629	4.3	3.343	4.469	5.233	4.372	4.471	4.611	4.657	5.075	3.812	5.366	3.997	4.318	4.817	5.493	4.831	4.702
232815_at	FBXO3	1.827	1.762	2.353	1.939	2.284	1.954	1.7	1.901	2.024	1.97	1.624	2.187	1.735	1.971	1.884	2.092	2.106	1.75	1.758	1.806	2.058	1.611	1.729	1.761	1.832	2.209	2.015	1.862	2.124	2.155	1.776	1.773	2.1	2.012	2.21	2.011	2.073	1.922	1.985	1.523	1.852	2.338	2.063	1.979	2.339	1.927	2.067	1.756
238686_at	FBXO3	4.888	4.77	5.574	5.952	5.518	6.794	5.249	6.069	5.482	6.638	6.386	4.164	5.987	5.135	6.377	5.833	5.536	6.175	5.916	5.936	5.756	5.661	5.898	4.971	6.203	6.811	5.867	5.346	5.958	5.327	5.173	6.175	5.073	5.485	7.032	5.867	6.112	6.28	6.567	6.123	5.289	6.972	5.045	5.242	6.212	6.549	6.282	5.907
242791_at	FBXO3	2.124	2.448	2.385	2.324	2.239	2.511	2.225	2.495	2.485	2.138	2.54	2.499	2.567	3.073	2.213	2.482	2.374	2.64	2.505	2.145	2.37	2.573	2.07	2.419	2.196	2.474	2.178	2.495	2.149	2.387	2.049	1.976	3.003	2.573	2.34	2.213	2.361	2.139	2.986	2.124	2.538	2.239	2.267	2.685	2.319	2.441	2.177	2.197
242007_at	FBXO30	2.903	3.139	2.948	3.464	3.056	4.482	3.257	3.277	2.467	3.741	3.985	2.256	3.49	2.553	3.168	3.116	3.746	3.403	3.449	3.375	3.766	3.203	2.708	2.452	3.213	3.494	3.512	2.878	2.893	3.003	2.978	3.749	2.979	2.86	4.105	3.097	3.653	3.596	3.286	3.593	2.999	4.164	2.59	3.322	3.196	3.141	4.337	2.949
219608_s_at	FBXO38	3.359	3.209	3.093	3.872	2.453	2.988	2.874	3.56	3.088	3.33	3.61	4.425	2.97	3.746	3.293	3.831	3.118	4.935	3.823	3.005	2.917	2.284	2.461	3.443	3.824	2.991	3.188	3.574	3.052	3.365	2.845	3.227	3.445	3.192	3.823	3.141	4.248	2.66	4.567	2.617	4.401	2.613	3.089	3.582	2.833	4.064	2.279	3.274
223493_at	FBXO4	3.008	3.961	3.881	3.68	3.853	4.757	3.859	3.948	3.991	4.848	4.445	3.546	4.073	3.537	4.628	4.585	3.875	4.43	4.112	3.941	3.771	4.344	4.265	3.595	4.085	5.031	4.033	3.629	3.559	4.024	3.518	4.13	3.805	3.821	4.963	4.288	4.279	4.382	4.186	4.756	3.851	5.204	3.382	3.872	4.237	4.642	4.375	3.749
233366_at	FBXO4	2.761	2.649	3.094	2.573	2.68	2.595	2.461	2.965	2.638	3.312	3.233	2.497	3.148	3.358	2.909	3.441	2.851	3.071	3.027	2.582	2.638	2.219	2.252	2.747	2.782	2.724	2.914	2.733	2.997	2.406	2.454	2.262	3.192	3.301	3.057	2.4	2.818	2.313	2.709	2.513	2.819	2.304	2.443	2.271	2.565	2.962	2.229	2.535
207674_at	FCAR	7.39	5.82	5.311	6.633	5.006	5.68	5.498	6.124	4.975	4.894	5.787	7.128	6.831	4.969	5.381	4.944	6.903	5.054	5.421	5.131	4.842	4.709	5.531	5.148	5.505	5.322	6.696	5.498	7.273	4.736	6.228	5.695	4.411	5.638	5.684	4.682	5.253	6.422	5.543	5.011	6.278	5.084	5.917	5.482	4.848	3.9	5.452	6.248
211305_x_at	FCAR	4.049	3.202	3.313	3.547	3.296	3.546	3.521	3.132	3.039	3.252	3.154	3.997	3.478	3.578	2.759	3.415	3.907	3.085	3.492	3.384	3.391	2.954	3.213	3.195	3.533	3.703	3.31	3.032	3.977	3.648	3.687	3.785	3.436	3.532	2.962	2.95	3.256	3.237	3.163	3.047	3.378	3.275	3.714	3.553	3.378	3.244	3.367	3.294
211306_s_at	FCAR	4.044	2.939	2.815	4.054	2.696	3.735	3.284	2.953	2.571	2.58	2.844	4.34	3.841	2.761	2.722	2.989	3.738	2.637	2.984	2.794	2.918	2.628	2.639	3.107	3.652	3.009	3.279	2.979	4.086	3.158	3.94	3.563	3.411	2.643	2.657	2.369	2.323	3.236	2.483	2.777	3.077	2.656	3.215	3.191	2.714	2.158	2.693	3.289
211307_s_at	FCAR	5.922	3.679	3.934	5.002	3.239	3.513	4.007	4.309	3.578	3.262	4.202	6.164	4.49	4.242	3.545	3.101	5.208	3.935	3.606	3.163	3.348	2.953	3.082	2.597	3.648	3.837	4.826	4.131	5.615	3.759	3.745	3.517	2.961	3.989	3.787	3.54	3.804	4.443	4.275	3.041	4.878	3.748	4.063	3.788	3.532	2.951	2.929	4.433
211816_x_at	FCAR	6.088	4.348	4.255	5.105	4.311	4.571	4.04	5.339	3.988	3.977	4.9	5.856	5.085	4.39	4.549	4.068	4.569	4.441	4.578	3.883	4.236	3.873	4.03	4.753	4.243	4.238	5.438	4.209	5.685	4.516	4.146	4.309	3.817	4.473	4.279	4.431	4.413	4.656	4.482	4.529	5.174	4.134	4.816	4.937	4.453	3.799	3.996	4.258
1555153_s_at	FCHO2	3.749	2.94	2.823	3.355	2.464	2.494	2.807	3.459	2.22	2.781	2.4	3.909	4.156	4.586	2.541	3.119	2.726	3.347	5.237	2.069	3.699	2.553	2.388	4.41	3.846	3.181	2.309	3.601	2.825	2.803	2.151	2.308	4.334	3.608	2.578	2.134	2.902	2.041	2.641	1.646	3.623	2.068	2.301	3.386	2.993	2.395	2.356	3.399
235982_at	FCRL1	4.172	4.509	4.727	5.46	4.624	5.843	4.865	5.661	5.79	5.898	4.545	3.473	5.341	4.959	5.841	5.205	5.385	5.237	5.681	5.108	3.247	5.146	5.988	4.075	4.467	5.439	4.695	5.498	4.52	3.852	3.076	4.83	4.84	4.767	3.952	3.748	4.551	4.293	5.199	4.219	3.139	5.329	4.226	4.205	4.455	5.622	4.887	5.399
243968_x_at	FCRL1	4.726	5.598	5.932	5.822	5.561	6.793	5.836	6.154	6.529	6.639	5.94	4.758	6.015	5.629	6.093	5.896	6.333	5.901	6.325	6.148	4.113	6.186	6.4	5.23	5.894	6.479	5.613	6.157	5.678	5.244	4.294	6.342	5.629	6.474	5.792	5.137	5.761	5.388	6.096	5.307	4.316	6.393	4.763	4.78	5.821	6.661	6.006	6.23
1553196_a_at	FCRL3	3.143	4.09	3.631	4.274	3.518	4.002	3.275	4.232	4.539	4.697	3.097	3.572	4.425	4.509	4.038	4.959	3.586	4.948	4.225	3.877	3.879	3.98	4.398	4.096	4.1	3.295	3.742	3.936	3.382	3.512	3.417	3.827	4.499	4.287	6.158	3.84	5.197	3.276	5.779	4.274	4.514	3.558	3.373	4.091	4.51	4.959	4.395	4.809
239161_at	FDX1	3.86	3.913	4.109	3.94	4.09	4.753	3.953	4.316	4.195	4.493	4.41	3.318	4.276	4.029	4.227	4.092	3.656	3.963	3.847	4.179	3.677	4.259	4.436	4.013	3.862	4.094	3.978	4.358	3.819	3.946	3.842	4.062	4.012	3.776	4.579	4.807	4.255	4.698	4.7	4.822	4.097	4.947	4.159	4.141	4.343	4.501	4.835	4.053
204768_s_at	FEN1	4.496	4.061	4.485	4.509	4.105	4.706	4.49	4.888	4.887	5.058	4.54	3.933	4.35	4.835	5.541	5.077	4.489	4.829	4.596	4.209	4.605	4.77	4.629	4.473	4.698	4.866	4.535	4.099	4.638	4.661	4.357	3.535	5.136	4.723	5.247	4.883	5.225	4.57	5.333	4.877	4.771	5.267	5.377	4.558	4.673	5.613	4.664	4.334
203562_at	FEZ1	4.228	4.318	6.763	5.56	5.134	4.34	4.299	5.506	4.311	6.23	4.766	5.707	5.533	4.873	4.937	5.88	4.326	6.384	5.286	5.249	4.753	5.517	5.029	3.979	4.556	5.396	5.685	3.845	4.767	4.776	4.567	5.077	5.069	4.585	4.137	4.5	4.522	3.424	4.45	4.726	4.788	3.763	4.823	4.935	6.604	5.174	5.016	4.351
210704_at	FEZ2	3.298	2.51	3.255	2.877	2.321	2.511	2.924	3.164	2.467	3.319	2.871	3.54	2.853	3.017	2.501	2.876	3.178	2.94	2.823	2.16	2.745	2.589	2.973	2.71	2.58	3.135	2.326	2.634	2.397	2.649	2.905	2.582	2.894	2.791	2.327	2.99	2.688	2.986	2.923	2.383	3.287	2.75	2.713	2.859	3.362	2.739	2.403	2.388
223836_at	FGFBP2	6.411	6.541	8.946	8.525	9.111	8.953	7.951	7.981	8.607	8.985	7.782	7.86	8.799	7.885	8.332	9.06	8.613	9.687	7.948	8.873	8.697	9.599	7.454	8.122	7.619	9.02	8.296	7.266	7.749	7.733	6.877	8.268	8.082	8.61	9.827	9.768	10.126	7.862	9.467	8.775	8.912	10.423	9.001	9.045	10.267	9.808	9.027	8.54
203638_s_at	FGFR2	2.818	2.296	2.999	2.64	2.121	2.72	3.943	2.992	2.376	2.865	3.653	3.082	2.144	2.502	2.886	2.458	2.451	2.992	2.708	2.272	2.287	2.662	2.33	2.394	2.027	3.086	2.736	2.338	2.828	2.559	2.572	2.663	2.76	2.946	3.669	3.911	2.872	2.984	3.43	3.393	2.586	3.265	2.855	2.109	3.399	3.436	2.654	2.739
203639_s_at	FGFR2	2.482	2.463	2.577	2.179	2.288	1.985	2.33	2.314	2.495	2.289	2.178	2.583	2.263	2.035	2.261	2.327	2.176	2.412	2.305	2.264	1.83	2.157	2.389	2.992	2.2	2.033	2.334	1.652	2.513	2.475	2.357	2.171	2.344	2.439	2.478	2.168	2.273	2.111	2.552	2.514	2.211	2.218	2.409	1.823	2.184	2.576	2.362	2.224
208228_s_at	FGFR2	2.647	3.046	2.476	2.829	2.878	2.985	3.153	3.12	3.159	3.013	3.325	3.066	2.024	2.799	2.882	2.786	2.674	2.952	3.029	2.793	2.793	2.993	3.001	2.615	2.805	2.829	2.69	2.899	3.074	2.896	2.759	2.663	3.192	1.978	3.314	3.473	3.041	3.106	3.061	3.076	2.848	3.445	2.974	2.722	3.04	3.289	3.211	2.851
208229_at	FGFR2	2.633	2.475	3.088	2.572	2.337	3.344	3.006	2.472	2.952	3.008	2.822	2.752	2.592	2.669	3.291	2.816	2.428	2.613	2.506	2.5	3.261	2.58	2.929	2.473	2.483	3.175	2.901	2.229	3.06	2.81	2.512	3.326	2.785	2.903	3.116	3.249	2.753	2.939	2.694	2.84	2.304	2.854	2.996	3.2	2.492	4.037	2.731	2.868
211401_s_at	FGFR2	2.342	2.783	2.24	2.389	2.568	2.297	2.065	2.451	2.325	2.023	2.378	2.462	2.213	2.224	2.393	2.395	2.468	2.24	2.256	2.027	2.565	2.416	2.286	2.641	2.286	2.391	2.505	2.361	2.197	2.623	2.821	2.492	2.313	2.312	2.647	2.318	2.16	2.521	2.272	2.216	2.814	2.699	2.664	2.477	2.524	2.584	2.413	2.327
240913_at	FGFR2	2.275	2.275	2.278	2.468	2.099	2.103	2.414	2.025	2.323	2.016	2.198	2.431	1.829	2.135	2.215	2.189	1.974	2.035	2.052	2.434	2.096	2.111	1.864	2.017	2.156	1.991	2.234	1.955	2.533	2.645	2.731	2.056	2.245	2.315	2.307	2.587	2.242	2.199	2.002	2.366	2.619	2.418	2.622	2.688	1.829	2.488	2.147	2.196
206492_at	FHIT	5.442	6.153	4.964	5.104	4.878	5.505	4.508	5.712	5.844	5.611	5.167	4.583	5.295	5.233	5.903	5.074	4.131	5.226	4.951	5.706	4.62	5.078	4.739	6.05	4.383	5.595	4.817	5.652	4.572	5.266	5.882	5.016	5.753	5.142	3.74	4.457	4.438	5.449	4.079	5.718	4.303	5.488	5.763	4.761	4.246	4.34	5.506	5.135
235250_at	FLCN	5.012	5.748	5.066	4.717	8.188	4.63	6.365	4.186	7.333	5.507	6.238	8.113	5.298	6.401	5.614	7.426	6.147	5.983	4.535	7.926	6.137	6.541	6.023	7.745	5.017	4.683	7.764	6.176	5.901	6.183	6.497	5.555	5.295	4.365	5.286	5.824	5.868	6.632	5.497	6.949	7.058	5.137	6.266	8.29	4.024	8.265	6.81	5.85
213746_s_at	FLNA	6.694	6.739	6.548	6.395	6.702	5.961	6.84	6.536	6.221	6.306	5.939	7.213	6.349	6.383	6.219	6.803	6.471	7.089	6.309	5.769	6.958	6.007	5.91	6.758	6.725	6.008	6.289	6.945	7.199	7.065	8.266	5.864	6.661	6.633	5.97	7.006	8.756	6.273	8.216	7.223	7.278	7.072	7.06	6.877	7.378	6.17	6.412	5.972
222866_s_at	FLVCR2	3.853	3.275	3.955	4.038	3.353	3.526	3.773	3.906	3.527	3.608	3.499	3.862	4.114	4.058	3.938	3.454	4.244	3.724	3.937	3.568	3.863	3.754	3.746	3.706	3.508	3.516	4.036	3.526	4.222	3.765	3.903	3.617	3.497	3.53	3.837	3.643	3.774	4.943	3.935	4.169	3.532	3.577	4.058	3.745	3.606	3.784	4.159	4.244
227844_at	FMNL3	4.579	4.683	4.155	4.476	5.091	5.038	4.811	5.087	5.493	4.804	4.21	3.98	4.435	4.36	4.812	4.711	4.43	5.146	4.633	4.872	4.212	4.574	4.799	4.819	5.043	4.449	4.686	4.578	4.673	4.341	4.75	4.37	5.264	4.62	4.14	4.819	4.827	4.63	4.433	5.069	3.769	5.049	4.835	4.911	4.581	4.411	4.967	4.435
238823_at	FMNL3	3.684	3.628	3.864	3.588	4.309	4.069	3.767	4.2	4.468	3.78	3.215	3.109	4.003	3.58	3.656	3.63	3.12	4.281	3.371	4.357	3.191	3.69	4.265	3.973	4.019	3.401	3.72	3.544	3.631	3.635	3.721	3.896	4.18	3.914	3.327	4.003	3.562	3.764	3.459	3.75	3.435	4.241	3.659	3.418	3.894	3.22	4.054	3.712
230086_at	FNBP1	4.588	4.071	4.758	4.351	4.255	4.036	4.206	4.619	4.37	4.008	4.3	4.23	4.547	4.454	4.591	4.331	4.72	4.533	4.185	4.215	3.739	4.036	4.629	4.639	4.579	5.004	4.015	4.241	4.31	4.727	5.462	4.427	4.686	3.967	4.143	4.293	5.175	4.825	5.045	4.934	4.173	5.736	5.671	3.829	4.932	3.566	4.534	3.758
1559060_a_at	FNIP1	3.609	3.359	3.208	3.732	3.298	2.853	3.546	3.689	2.874	3.375	3.391	3.509	4.066	3.427	2.619	3.27	3.193	3.001	3.512	3.153	3.235	2.641	2.759	3.285	3.396	3.425	3.029	3.635	3.198	3.201	2.693	3.149	3.477	3.401	2.802	2.383	2.541	2.051	2.55	2.224	3.193	2.356	2.482	3.05	2.79	2.83	2.519	3.402
223997_at	FNIP1	2.541	2.425	2.329	1.998	2.294	1.828	1.694	2.084	1.778	1.873	2.485	2.157	2.297	2.626	2.057	2.341	2.389	3.62	2.719	2.508	2.214	2.181	1.906	2.321	3.2	2.03	2.258	2.004	2.245	2.729	2.358	2.311	2.043	2.341	2.991	2.387	2.36	2.01	3.383	2.001	2.532	1.829	2.09	2.966	2.326	2.338	2.012	2.36
228250_at	FNIP1	6.352	5.689	5.974	6.552	5.361	5.351	5.298	5.713	4.592	6.138	6.093	5.686	5.693	6.739	4.619	5.79	5.433	5.334	6.896	4.201	5.665	4.434	4.542	5.712	5.323	5.74	4.954	5.979	5.296	4.397	4.446	5.043	4.908	5.989	5.316	5.897	4.938	5.306	5.045	3.944	5.667	4.643	4.356	4.485	5.169	4.729	4.043	5.297
243861_at	FNIP1	1.933	2.236	1.856	1.964	1.951	2.229	1.813	1.803	1.797	2.097	1.702	1.926	2.047	1.839	2.089	1.933	2.61	1.94	2.129	1.956	1.848	2.224	1.731	1.837	2.015	1.902	1.936	2.107	1.964	2.083	2.139	2.03	2.027	1.841	1.858	2.264	1.929	1.951	1.817	2.009	1.97	1.969	1.756	1.912	1.999	2.053	1.97	1.987
1569352_at	FNIP2	3.445	3.563	4.478	3.724	2.937	3.667	3.914	5.093	3.831	3.788	4.111	3.178	3.36	3.875	3.65	4.034	3.689	4.302	3.632	3.551	3.123	3.676	4.123	3.49	3.901	4.316	3.76	3.857	3.51	3.573	4.371	3.659	3.732	3.955	3.101	3.575	3.706	4.225	3.429	4.528	4.078	4.218	4.147	3.83	4.783	3.604	3.482	2.888
204437_s_at	FOLR1	2.964	2.707	2.407	2.66	2.695	2.577	2.347	2.439	2.795	2.719	2.527	2.72	2.676	2.575	2.735	2.696	2.559	2.548	2.569	2.796	2.826	3.211	2.487	2.489	3.008	2.542	3.198	2.747	2.671	2.618	2.693	2.808	3.162	2.531	2.311	2.261	2.581	2.451	2.602	2.686	2.617	2.655	2.544	2.429	2.404	2.39	2.635	3.059
206371_at	FOLR3	11.472	6.812	5.92	11.102	8.238	7.491	9.852	9.42	10.062	6.683	6.477	11.113	7.275	6.318	10.929	6.556	7.551	7.723	6.798	9.655	7.201	6.672	9.618	7.073	7.619	6.822	11.624	9.519	5.915	9.505	7.469	7.136	7.153	6.053	5.434	5.949	5.922	10.25	6.211	6.618	11.118	6.624	7.673	6.929	8.074	5.6	10.465	7.391
243409_at	FOXL1	3.589	3.775	3.477	3.559	3.131	3.394	3.193	2.801	3.325	3.123	3.898	3.281	3.343	3.165	3.293	3.367	3.172	3.448	3.319	3.253	3.163	3.703	3.394	3.399	3.059	2.923	3.391	3.248	3.684	3.695	3.945	3.729	3.476	2.953	3.511	3.916	3.587	3.917	3.694	3.577	4.062	3.517	3.881	3.291	3.285	3.385	3.375	3.711
230790_x_at	FOXN3	4.852	4.4	4.637	4.553	5.72	4.949	5.393	4.385	4.78	4.501	3.873	3.709	4.748	4.038	4.682	4.129	4.992	4.225	4.234	5.124	4.073	4.546	4.72	3.697	4.768	4.652	4.021	4.315	4.852	4.241	4.751	5.307	3.88	4.576	4.583	4.58	3.983	4.489	4.486	4.355	3.541	4.649	4.054	4.377	4.442	4.78	4.125	4.752
228484_s_at	FOXO1	2.552	2.387	2.337	2.381	2.492	2.415	2.621	2.22	2.713	2.304	2.397	3.043	2.361	2.44	2.244	1.887	2.739	2.355	2.296	2.625	2.331	2.342	2.556	2.27	2.327	2.807	2.47	2.193	2.567	2.75	2.558	2.303	2.437	2.104	2.28	2.692	2.384	2.82	2.206	2.676	2.438	2.419	2.653	2.608	2.305	2.623	2.533	2.701
205451_at	FOXO4	4.199	5.005	4.333	4.637	5.973	4.31	5.401	4.418	5.619	4.576	3.982	5.66	4.584	4.954	4.403	4.911	5.221	4.516	4.847	4.877	5.202	5.225	5.057	5.402	4.828	4.001	5.586	4.91	5.345	4.264	4.862	5.291	4.584	4.115	4.827	4.457	4.714	4.625	3.903	4.92	4.622	4.287	4.666	5.639	4.271	5.111	6.495	5.739
223936_s_at	FOXP1	3.555	4.044	3.598	4.31	3.166	3.158	3.645	4.124	3.474	3.637	3.147	4.386	4.014	4.986	3.307	3.638	3.329	3.707	4.153	2.954	3.574	2.861	3.296	4.356	4.234	3.583	3.398	4.188	3.068	3.929	3.329	2.941	4.05	4.398	3.153	3.35	3.493	3.169	3.319	3.144	3.966	3.132	3.302	4.114	3.314	3.507	3.779	3.452
223937_at	FOXP1	6.124	6.237	5.378	6.045	5.195	4.747	5.368	6.475	5.307	5.312	4.615	6.042	6.301	7.305	4.289	6.086	4.494	5.633	5.894	5.318	5.799	4.493	4.739	6.562	6.342	5.584	4.814	6.576	4.891	6.115	5.657	4.498	6.99	5.594	4.678	5.007	4.989	4.601	4.475	4.211	5.787	3.98	4.684	5.794	4.4	4.949	4.752	5.101
214560_at	FPR3	2.373	2.701	2.728	2.447	2.574	2.292	2.159	2.283	2.42	2.386	2.721	2.625	2.538	2.307	2.326	2.398	3.076	2.695	2.272	2.203	2.606	2.564	2.374	2.533	2.491	2.444	2.878	2.33	2.156	2.813	2.542	2.281	2.334	2.242	2.271	2.539	2.65	2.868	2.24	2.424	2.82	2.58	2.655	2.603	2.525	2.477	2.603	2.112
230422_at	FPR3	2.338	2.829	3.388	2.875	3.052	2.239	2.994	3.473	2.953	3.66	3.062	2.538	2.453	3.199	3	2.535	3.119	3.251	3.115	3.354	4.13	3.412	2.746	3.204	3.203	3.152	3.672	3.26	2.771	2.681	3.454	2.903	2.905	3.14	3.116	2.864	2.813	2.985	2.993	2.846	2.566	3.105	2.832	2.763	3.211	2.68	3.376	3.462
213056_at	FRMD4B	4.531	4.896	5.193	5.503	3.926	5.027	4.575	4.857	5.416	4.695	4.426	4.835	5.076	4.346	5.697	4.622	5.482	4.897	4.941	4.491	5.328	4.082	4.901	4.033	5.207	4.421	5.238	4.989	5.87	3.572	4.117	5.152	4.111	4.33	4.374	4.218	3.934	5.303	4.391	4.566	4.443	4.03	3.986	4.359	4.726	4.831	5.259	5.157
236688_at	FRMPD3	3.918	3.578	3.341	3.392	3.935	3.387	3.131	3.376	3.777	3.388	3.918	3.812	3.174	3.537	3.647	3.585	3.537	3.943	3.386	3.311	3.737	4.122	3.663	4.102	3.426	3.445	3.405	3.701	3.312	3.896	4.02	3.543	3.651	3.284	3.843	3.868	4.541	3.983	4.636	4.331	4.6	4.394	4.174	4.026	4.295	4.182	3.948	3.999
1555904_at	FRY	5.947	5.725	5.628	6.316	5.529	6.303	6.038	5.699	5.228	5.501	5.006	5.597	5.837	5.098	5.988	5.432	6.45	5.485	6.568	5.905	5.569	5.773	5.577	5.797	5.37	5.716	5.955	5.806	5.937	4.729	5.634	6.131	5.853	5.877	4.641	5.507	5.158	6.092	4.423	5.298	5.424	5.254	5.26	5.112	5.603	4.943	5.362	5.358
214318_s_at	FRY	4.475	2.868	3.096	3.644	3.143	3.243	3.623	3.286	2.982	2.791	2.68	4.086	3.66	3.028	3.017	3.237	3.165	2.702	3.939	3.542	3.564	3.355	3.262	2.932	3.414	3.197	3.12	3.186	3.577	2.996	3.355	2.948	3.151	3.318	2.875	2.823	2.978	2.952	2.436	2.684	3.239	2.569	3.239	3.186	3.472	2.592	2.771	2.585
214319_at	FRY	2.491	2.358	2.531	2.718	2.567	2.304	2.743	2.43	2.346	2.263	2.327	2.598	2.71	2.329	2.479	2.435	3.061	2.058	2.398	2.49	2.565	2.833	2.7	2.336	2.348	2.078	2.542	2.553	2.427	2.228	2.05	2.29	2.587	2.535	2.34	2.346	2.272	2.496	2.269	2.137	2.286	2.446	2.381	2.325	2.148	2.387	2.482	2.517
230904_at	FSD1L	2.031	2.099	2.424	2.42	3.193	3.512	2.237	2.181	2.096	2.702	2.086	2.016	1.86	1.859	2.42	2.642	1.878	2.377	2.066	2.574	2.098	2.359	2.17	1.976	2.232	3.047	2.476	2.244	2.059	2.068	2.013	2.104	1.752	2.187	3.423	2.398	2.496	2.777	2.892	3.047	2.192	3.626	2.175	2.503	2.757	2.744	2.893	2.273
242586_at	FSD1L	1.673	1.866	2.159	2.227	1.711	3.665	2.141	2.175	1.728	2.351	2.63	1.688	1.85	1.99	2.012	2.153	2.039	2.453	2.008	2.067	2.261	2.375	1.673	2.002	1.748	2.655	2.355	2.091	2.066	2.151	1.49	2.063	1.96	2.034	3.764	2.079	2.496	2.951	3.661	2.892	1.823	3.49	1.716	2.033	2.524	2.841	2.56	2.273
242807_at	FSD1L	2.119	2.557	2.528	2.325	2.166	2.762	2.035	2.11	2.438	2.417	2.643	2.47	2.487	2.156	2.421	2.487	2.264	2.699	2.466	2.684	2.697	2.512	2.224	2.135	2.311	2.513	2.443	2.502	2.246	2.388	1.87	2.479	2.033	2.293	2.418	2.311	2.357	2.947	2.638	2.625	2.811	3.48	2.052	2.639	2.443	2.638	2.713	1.978
238129_s_at	FZD2	4.05	4.2	3.97	3.373	3.481	3.675	3.34	4.037	3.111	3.37	3.698	3.765	4.14	4.174	3.797	3.805	4.422	3.595	4.119	3.857	3.813	3.264	3.895	4.719	4.036	3.193	3.936	4.333	4.133	3.713	4.412	4.088	3.735	4.108	2.77	4.019	3.42	3.686	3.662	3.77	4.348	3.119	4.012	4.112	3.81	3.753	3.84	3.678
219683_at	FZD3	2.175	2.423	2.658	3.218	2.422	2.395	2.414	3.066	2.789	2.374	2.859	2.343	2.077	2.256	2.548	2.542	2.641	2.794	2.611	1.972	2.294	2.955	2.435	2.415	2.46	2.659	2.41	2.247	2.175	2.388	2.021	2.164	2.384	3.227	2.542	2.532	2.298	2.269	2.414	2.536	1.909	2.98	2.061	2.149	2.65	2.221	2.203	1.903
227499_at	FZD3	2.366	2.158	2.996	3.449	2.156	2.815	2.502	2.542	2.554	2.657	2.433	2.366	2.014	2.052	2.492	3.067	2.465	2.505	2.71	2.784	2.192	2.366	2.343	2.13	2.447	2.655	2.542	2.067	2.186	2.019	2.508	2.818	2.277	2.643	2.281	2.657	2.421	2.871	2.452	2.692	2.099	3.856	2.299	2.185	2.166	2.477	2.563	1.798
227524_at	FZD3	3.184	3.323	3.546	4.167	3.831	3.954	3.643	3.827	3.91	3.687	4.174	2.99	3.614	3.478	3.501	4.214	4.461	3.885	4.231	3.404	3.67	3.479	3.631	3.903	3.615	3.569	3.494	3.54	3.804	3.691	3.791	3.616	3.865	4.245	3.289	4.196	3.707	3.506	3.39	3.285	2.916	3.404	3.324	3.506	3.488	3.544	3.373	2.905
239082_at	FZD3	4.882	5.029	5.342	6.338	5.401	5.366	5.496	5.897	6.009	5.171	5.446	4.311	5.298	4.723	5.46	6.13	5.93	5.435	5.542	5.199	4.884	6.069	5.377	4.996	5.318	5.369	5.082	5.039	4.843	5.88	5.458	5.429	5.466	5.873	4.04	5.285	4.775	5.236	4.044	5.563	4.589	6.147	5.19	4.521	4.773	5.038	5.286	4.594
208869_s_at	GABARAPL1	6.006	4.625	4.244	5.012	5.195	5.176	5.428	4.577	4.569	5.235	4.778	5.635	5.213	4.652	4.981	5.087	6.455	4.576	5.157	5.108	5.592	5.062	5.107	4.357	5.322	4.766	4.974	5.298	6.037	4.324	5.223	6.287	4.57	5.556	5.614	4.501	5.338	5.182	4.484	5.099	5.469	5.538	5.835	4.841	4.363	4.591	5.964	5.09
1568983_a_at	GABPB1-AS1	6.617	6.775	7.172	7.189	6.982	8.436	7.966	7.546	8.135	8.589	8.055	6.801	7.274	8.539	8.435	7.196	7.865	6.164	6.456	8.407	7.154	8.177	8.51	6.858	8.559	7.801	7.597	8.361	7.903	7.451	9.13	7.504	8.92	7.068	5.801	7.574	7.711	6.314	6.391	7.889	7.706	6.894	8.511	7.437	6.615	7.852	6.575	7.276
231979_at	GABPB1-AS1	4.522	4.947	4.979	5.403	4.756	6.469	5.648	5.578	6.306	7.215	5.919	5.41	5.199	7.043	6.148	5.03	6.178	4.187	4.477	6.217	5.494	5.593	6.192	4.859	6.942	5.785	5.69	6.482	5.997	5.089	6.72	4.997	7.217	4.542	3.585	5.495	5.83	4.382	4.423	5.41	5.641	4.363	5.903	5.604	4.617	5.729	4.047	5.306
235172_at	GABPB1-AS1	2.556	3.759	3.154	4.662	2.971	4.63	3.575	4.846	4.574	6.364	4.536	3.932	4.171	6.575	4.057	3.934	3.806	3.571	4.104	4.158	3.734	3.984	4.119	3.897	5.077	4.119	5.088	6.196	4.457	3.372	4.063	3.188	6.58	4.104	3.353	4.58	4.255	2.504	2.982	3.107	4.62	2.59	2.787	3.677	3.622	4.191	2.817	4.042
235274_at	GABPB1-AS1	4.863	5.195	5.3	5.815	4.958	6.758	5.906	5.669	6.84	7.343	6.112	4.515	5.417	6.586	6.85	5.263	6.169	4.837	4.614	6.477	5.048	6.764	6.604	4.759	5.614	5.381	6.073	6.663	6.119	4.633	6.951	6.271	6.8	5.147	4.893	5.734	5.884	5.298	5.247	5.966	5.67	5.719	5.863	5.553	4.94	6.51	5.565	5.447
205219_s_at	GALK2	3.504	3.149	3.59	3.868	3.643	4.293	3.597	3.284	4.04	4.094	4.176	3.4	3.781	3.604	4.384	3.667	3.704	4.077	3.857	3.681	3.812	4.08	3.674	3.344	4.122	4.595	3.721	3.414	3.19	3.874	3.877	4.19	3.526	4.347	4.74	4.627	4.178	3.9	4.416	4.308	3.533	4.383	4.185	3.651	4.061	4.703	4.1	3.861
222587_s_at	GALNT7	7.102	7.129	6.933	7.789	6.512	6.072	6.341	7.473	5.987	7.162	6.875	7.002	7.458	6.884	6.118	6.888	7.151	6.807	7.506	5.842	7.196	5.995	6.529	6.644	6.367	7.237	6.719	6.645	6.592	5.393	4.847	6.395	6.533	7.076	6.468	6.47	5.998	5.651	6.295	5.468	6.537	5.552	4.632	6.346	6.595	5.945	5.469	6.77
1558859_at	GARS-DT	2.768	2.946	2.786	3.624	2.661	2.886	3.119	3.775	3.193	3.138	2.216	2.963	3.331	3.573	3.386	3.868	3.099	3.019	3.101	2.681	3.162	2.783	3.099	3.384	2.905	2.614	2.875	2.876	3.346	2.798	2.994	2.816	3.733	3.368	2.709	2.596	3.481	3.294	2.924	2.822	3.787	2.921	3.077	3.399	2.4	2.799	2.924	2.48
242634_at	GATAD1	1.974	2.642	2.328	2.072	1.936	1.989	1.875	2.558	2.309	2.537	2.792	2.577	2.867	2.374	2.306	2.341	2.356	2.564	2.521	3.086	2.002	2.126	2.237	2.132	2.079	2.909	2.541	2.338	1.962	2.606	2.28	2.029	2.389	2.22	1.952	2.267	2.462	2.109	2.096	2.095	2.212	2.341	2.483	2.534	2.471	2.554	2.272	2.273
1570541_s_at	GBP1P1	2.946	3.004	2.609	2.989	2.859	2.942	2.926	2.491	3.005	2.491	2.761	3.023	2.723	2.513	2.34	2.598	2.466	2.819	2.639	2.873	2.503	2.677	2.816	2.786	2.43	2.878	3.155	3.094	2.834	2.967	2.753	3.005	2.928	2.911	3.242	2.818	3.07	3.458	3.191	3.021	3.205	2.845	2.813	3.127	2.791	2.699	2.84	2.7
1559606_at	GBP6	2.087	1.932	1.723	1.754	1.773	1.709	2.186	1.836	1.828	1.851	2.076	1.856	1.934	1.809	1.586	1.876	2.047	1.596	1.805	1.828	2.06	1.937	1.694	1.623	1.644	2.128	1.818	2.075	1.85	2.123	1.924	2.032	1.791	1.896	1.939	1.838	1.846	2.536	2.117	1.719	1.998	1.715	1.875	1.765	1.541	1.698	1.867	2.001
1559607_s_at	GBP6	2.825	2.624	2.424	2.796	2.54	2.466	3.195	2.259	2.811	2.238	2.397	2.41	2.728	2.47	2.899	2.946	2.448	2.392	2.465	2.892	2.886	2.572	2.591	2.63	2.608	2.565	2.837	2.428	2.714	2.849	2.493	3.18	2.369	2.771	4.403	2.487	3.065	5.086	3.412	2.817	3.018	2.505	3.171	2.65	2.466	2.287	2.632	2.753
1555330_at	GCLC	2.762	2.746	2.839	3.103	2.949	2.123	2.771	3.614	3.128	3.102	2.97	2.895	3.239	2.951	2.659	3.093	2.626	3.243	3.339	2.66	2.917	3.04	2.943	2.861	2.549	3.446	2.991	3.59	2.912	2.907	2.448	2.733	2.894	3.134	3.442	3.027	3.657	2.905	3.55	3.089	3.169	2.862	3.076	2.78	3.753	2.872	2.665	2.573
234986_at	GCLM	3.024	3.282	4.647	4.108	3.912	5.094	3.465	4.11	3.43	4.295	4.028	2.846	3.547	3.211	3.243	3.838	3.761	4.37	3.981	3.679	3.926	3.974	3.393	2.634	3.417	4.53	3.824	3.292	3.392	2.859	2.747	4.273	2.897	3.446	5.002	4.564	4.1	4.31	4.611	3.677	3.291	4.555	2.608	3.607	5.168	4.082	4.31	3.957
236140_at	GCLM	3.799	4.12	5.342	4.085	4.622	4.33	4.707	4.519	4.408	4.792	3.664	3.846	4.846	4.086	4.154	4.692	4.235	4.219	4.432	4.272	3.961	4.279	4.597	3.422	4.332	5.426	4.387	4.4	4.144	3.666	3.686	4.078	3.678	3.937	4.178	4.052	3.879	3.741	4.137	3.73	4.228	4.052	3.674	4.309	4.686	3.734	4.003	5.022
234540_at	GCNT7	1.578	1.706	1.845	1.907	1.891	1.546	1.908	1.839	1.978	1.644	2.025	1.841	1.702	1.662	1.727	1.62	1.583	1.743	1.726	1.894	2.116	1.917	1.751	1.802	1.74	1.934	1.73	1.806	1.659	1.974	1.595	1.638	1.886	2.154	2.17	1.677	1.579	1.904	1.551	1.508	1.97	1.567	1.685	1.627	1.692	1.921	1.829	1.747
205063_at	GEMIN2	1.783	2.534	2.217	2.38	2.859	3.956	2.819	2.906	2.352	3.871	2.639	1.754	2.745	2.297	2.957	2.953	2.782	2.663	2.13	2.508	2.481	2.16	2.364	1.577	2.737	3.919	2.634	2.365	2.48	2.141	2.239	3.103	2.465	2.219	3.465	2.201	2.804	2.751	3.37	2.983	1.798	3.879	1.644	2.132	2.728	3.139	3.626	2.224
210779_x_at	GEMIN2	2.892	3.194	2.662	3.329	2.975	4.066	3.675	3.542	2.877	3.758	3.549	3.148	3.546	3.039	3.199	3.251	3.596	3.093	3.273	2.417	3.293	3.15	3.263	3.303	3.144	3.44	2.866	3.3	2.945	3.419	3.288	3.367	2.96	2.986	3.912	3.052	3.208	3.63	3.648	3.97	3.066	3.895	2.822	2.742	3.186	3.994	3.65	3.214
211114_x_at	GEMIN2	2.743	2.798	3.355	3.082	3.184	3.976	2.988	2.83	2.602	3.574	3.851	2.745	3.083	3.441	3.132	3.436	3.427	3.468	3.092	3.223	3.353	3.077	3.075	3.241	3.621	3.92	3.669	3.229	3.122	3.061	2.946	3.259	2.909	3.039	3.588	3.332	3.541	3.603	3.502	3.57	3.223	3.964	3.072	3.33	3.29	3.999	3.792	3.247
211115_x_at	GEMIN2	3.087	3.513	3.431	3.273	3.709	4.726	3.159	3.715	3.434	4.365	4.348	2.582	3.724	3.673	4.009	3.573	3.283	3.675	3.592	3.577	3.839	3.892	3.45	3.561	3.776	4.07	4.526	3.836	3.729	4.029	3.431	3.587	3.555	3.751	4.896	3.877	3.924	4.136	4.543	4.497	3.79	5.102	2.917	3.694	3.887	4.592	4.52	3.825
232295_at	GFM1	3.206	2.822	4.084	3.252	2.818	2.888	3.009	3.859	2.763	2.875	3.008	2.157	3.15	3.294	2.582	3.447	2.97	2.72	3.328	2.41	2.598	2.124	3.103	3.224	3.387	4.231	2.909	3.206	3.034	3.437	2.862	3.145	3.625	3.019	2.974	3.645	3.273	2.771	2.856	3.117	3.151	3.677	3.41	2.787	3.557	2.952	2.925	2.158
233937_at	GGNBP2	3.533	3.565	3.826	4.591	3.25	3.51	3.848	4.985	3.275	4.274	3.651	3.168	5.121	5.008	2.645	4.036	3.866	3.937	4.859	3.763	3.583	2.822	3.368	4.524	4.098	3.847	3.588	4.276	3.715	3.611	3.194	3.227	4.411	3.872	3.386	3.186	3.912	2.819	3.291	2.366	3.942	3.314	3.109	3.465	3.552	3.216	2.68	2.646
1554345_a_at	GIN1	2.169	2.432	2.977	2.988	3.054	3.918	2.988	2.952	2.579	3.962	3.778	2.49	3.26	3.244	3.079	3.523	3.066	3.009	2.862	2.681	3.51	2.988	2.657	2.062	3.479	3.983	2.773	3.082	2.3	2.468	2.097	3.082	2.491	3.176	4.035	2.978	3.528	3.777	3.863	3.299	2.934	4.533	2.304	2.652	3.031	3.172	3.744	2.59
219467_at	GIN1	3.138	3.596	3.659	3.953	3.318	5.596	3.528	3.441	3.634	4.604	4.407	3.109	4.045	3.592	3.764	4.54	4.293	4.392	3.829	3.839	4.919	4.27	3.538	3.643	4.178	4.881	4.118	2.981	3.127	3.25	3.088	3.331	3.904	3.918	4.63	4.016	4.968	5.078	4.849	4.751	3.607	5.388	3.468	3.532	3.939	4.81	5.088	3.681
221521_s_at	GINS2	4.017	4.118	3.793	3.188	3.882	4.22	4.299	3.585	3.61	3.876	3.729	3.838	3.555	3.833	5.203	4.352	3.496	3.797	3.437	4.022	4.087	3.972	3.456	4.527	4.091	3.827	3.995	3.599	3.829	3.602	3.648	3.605	3.646	3.365	4.648	4.706	4.314	3.84	4.462	4.921	4.673	3.842	4.97	4.453	4.121	5.105	4.459	3.656
243136_at	GINS2	2.454	2.731	2.469	2.511	2.409	2.221	2.288	2.32	2.409	2.435	2.719	2.95	2.244	2.322	2.168	2.133	2.581	2.077	2.352	2.32	2.605	2.44	2.38	2.242	1.966	2.123	2.517	2.673	2.514	2.536	2.671	2.38	2.324	2.985	2.097	2.536	2.64	2.472	2.312	2.337	2.82	2.465	2.535	2.537	2.689	2.391	2.253	2.505
218719_s_at	GINS3	3.193	3.279	3.47	3.456	3.337	3.588	3.435	3.437	3.83	3.7	3.139	3.082	3.616	3.334	3.545	3.775	3.247	3.695	3.321	3.403	3.42	3.642	3.619	3.427	2.863	3.454	3.812	3.962	3.341	2.991	3.328	3.639	3.052	3.654	4.344	3.549	3.784	4.051	3.742	4.402	3.59	4.063	3.783	3.654	4.051	4.07	3.917	3.467
1553772_at	GK5	2.362	2.767	2.681	3.202	2.434	2.415	2.509	2.686	2.415	2.666	2.562	2.375	2.256	3.02	2.434	3.297	2.063	3.117	2.592	2.294	2.804	2.469	2.363	2.515	2.666	2.708	2.66	2.561	2.182	2.442	2.579	1.963	2.231	2.603	2.796	2.387	2.96	2.324	2.438	2.09	2.788	2.674	2.684	2.882	2.659	2.591	2.353	2.131
238121_at	GK5	4.62	4.345	6.033	5.07	5.252	5.228	4.823	5.266	4.763	5.886	5.117	4.609	5.002	4.628	5.139	5.661	5.187	5.853	4.993	5.367	4.893	5.468	5.146	4.275	4.551	5.818	5.393	4.675	4.989	4.074	4.327	5.354	5.01	4.956	5.966	5.394	5.73	4.815	5.796	5.182	4.902	6.251	3.914	4.724	6.452	5.153	5.191	4.692
241384_x_at	GK5	1.665	1.832	2.319	1.975	1.632	2.233	1.56	2.145	1.662	2.163	1.842	2.034	1.683	1.695	1.861	2.085	2.17	2.331	2.017	1.798	1.954	1.793	1.904	1.691	1.581	1.859	2.233	2.012	1.8	1.634	1.521	2.382	1.532	2.11	2.551	2.165	2.925	2.123	2.127	1.958	1.943	2.865	1.695	1.942	2.551	2.16	3.005	1.81
229311_at	GKAP1	2.352	2.138	2.088	2.334	2.461	2.965	3.006	2.421	2.447	2.43	2.271	2.889	2.837	2.529	2.339	2.292	2.495	2.159	2.449	2.681	2.17	2.336	2.035	2.13	2.729	2.468	2.725	2.344	2.264	2.645	2.212	2.763	2.316	2.694	2.43	2.217	1.98	2.16	2.255	2.24	2.205	2.139	2.243	2.445	1.877	2.633	2.166	2.511
234192_s_at	GKAP1	3.891	4.159	4.446	4.075	4.024	5.393	3.779	4.39	4.022	4.715	4.997	3.482	4.182	3.873	4.155	3.999	4.139	4.456	4.322	4.064	4.822	4.211	3.813	3.668	3.811	4.624	4.394	4.301	4.302	3.685	3.783	4.556	3.936	4.428	4.86	4.18	4.3	4.048	4.402	3.975	3.217	5.296	3.376	3.797	3.81	4.174	4.576	4.162
1562888_at	GLB1L3	2.455	2.382	2.128	1.94	2.646	2.428	1.93	2.127	2.569	2.397	2.284	2.554	2.62	2.371	2.364	2.068	1.844	2.329	2.232	2.347	2.444	3.052	2.29	2.294	2.145	1.96	2.511	2.415	2.312	2.539	2.36	2.422	2.301	2.858	2.334	2.521	2.376	2.374	2.422	2.264	2.289	2.167	2.533	2.331	2.209	2.258	2.308	2.792
1569886_a_at	GLB1L3	1.744	2.043	1.962	2.258	2.465	1.771	2.076	1.766	2.12	1.97	1.836	1.698	1.728	1.689	2.011	2.337	1.857	1.705	1.807	1.92	1.706	1.822	1.746	1.879	1.994	1.881	1.943	1.92	1.739	2.139	1.915	1.874	1.905	2.082	2.162	2.314	2.057	1.885	3.86	2.051	2.112	2.291	1.779	1.648	2.267	1.999	2.741	2.186
204836_at	GLDC	3.766	3.493	3.65	3.595	4.085	3.596	5.125	3.57	3.683	3.615	3.313	3.6	3.2	3.476	5.836	4.249	3.492	2.878	3.325	3.251	3.342	3.525	3.58	4.501	3.486	2.643	3.798	3.385	3.954	3.867	3.891	4.145	3.102	4.143	4.421	4.056	4.219	3.592	6.079	4.792	4.372	4.121	4.764	4.26	4.412	4.235	3.968	3.802
206917_at	GNA13	2.489	1.953	2.662	2.381	2.115	1.912	1.991	2.403	2.195	2.471	2.173	2.539	2.365	1.771	2.261	2.172	2.338	2.164	2.16	2.055	2.064	2.2	2.082	2.13	2.106	1.972	2.242	1.983	2.455	2.164	1.977	2.475	1.841	2.014	2.595	2.739	2.157	2.405	2.177	2.144	2.487	2.141	2.581	2.233	2.55	2.101	2.027	2.372
215912_at	GNAO1	1.841	1.99	1.964	1.868	1.881	1.974	2.048	1.945	1.853	2.299	2.195	2.658	1.963	1.988	2.052	2.401	1.72	1.9	2.121	2.43	2.326	2.043	2.063	2.262	2.083	1.849	2.019	1.666	2.206	2.249	1.906	2.056	1.902	2.336	1.74	2.088	2.239	1.822	2.036	1.999	2.314	1.699	2.037	2.059	2.132	2.049	1.908	2.373
214157_at	GNAS	5.991	7.242	7.413	6.121	9.082	6.468	7.4	6.609	8.64	6.946	6.929	8.189	6.964	7.857	6.958	7.871	7.516	6.8	7.004	7.269	7.766	7.386	7.719	7.596	6.884	5.598	7.757	7.303	7.27	7.278	6.712	7.591	6.062	5.854	7.208	6.691	6.973	7.643	6.775	7.297	7.232	5.749	7.539	8.799	6.586	8.357	8.909	8.511
217057_s_at	GNAS	1.888	2.265	1.972	2.182	2.144	1.916	2.093	1.966	2.155	1.945	2.083	2.419	2.197	2.089	2.056	1.778	2.059	2.084	1.745	2.044	2.064	2.181	2.078	2.174	2.012	1.87	1.915	1.942	1.859	2.303	2.281	1.951	1.746	2.439	2.104	2.32	2.219	2.251	2.195	2.382	2.299	2.266	2.302	2.474	2.071	2.323	2.327	1.985
229274_at	GNAS	5.819	6.023	5.952	6.785	5.718	5.516	5.135	7.579	5.201	5.731	5.518	5.547	6.853	6.627	4.447	6.265	5.335	6.101	6.689	5.07	6.148	4.914	5.052	5.804	5.696	6.18	5.614	5.743	5.15	5.126	4.618	4.847	7.287	6.039	6.73	6.088	5.268	4.861	5.681	4.372	6.028	5.088	3.731	5.288	6.082	5.479	4.991	5.505
239037_at	GNAS	2.216	2.162	1.901	1.886	2.149	1.739	2.184	1.761	2.146	1.863	2.073	2.065	2.019	1.97	1.831	2.044	1.867	1.969	1.862	2.064	2.071	1.719	2.092	1.959	2.236	1.751	1.784	2.136	1.894	2.029	2.063	2.034	2.101	1.952	2.023	2.273	2.123	2.09	1.963	1.948	2.266	1.755	1.982	2.124	1.971	2.336	2.295	2.388
204384_at	GOLGA2	4.433	4.501	3.793	4.616	3.832	3.802	4.537	4.41	3.656	3.788	3.248	4.568	4.348	4.178	4.029	4.324	3.854	4.618	4.752	3.602	4.735	3.197	4.132	4.576	3.676	3.289	3.995	4.31	4.489	4.016	3.827	3.651	4.725	4.654	3.886	4.274	4.783	4.016	4.814	3.466	4.551	3.331	3.56	4.442	4.024	3.391	3.787	3.957
204322_at	GOLIM4	2.663	2.728	2.869	2.685	2.59	2.892	2.614	2.452	2.857	2.772	2.582	3.192	2.666	2.948	2.928	3.088	2.714	2.807	2.922	3.579	3.519	3.114	2.843	3.23	2.892	2.526	2.655	2.59	2.585	3.108	2.913	3.028	2.968	3.067	3.619	2.426	2.641	3.316	2.843	2.65	3.284	2.789	3.005	3.012	2.374	2.981	2.892	3.364
204324_s_at	GOLIM4	1.927	2.224	2.57	2.639	2.012	2.001	2.38	2.608	2.128	2.452	2.305	2.295	2.2	2.669	2.625	2.655	2.307	2.762	2.865	2.425	2.186	2.31	2.036	2.633	2.285	2.504	2.279	2.572	2.085	2.323	1.86	2.16	2.881	2.218	2.493	2.219	2.797	2.243	3.126	2.211	2.412	2.52	2.148	2.643	2.548	2.334	2.08	2.508
238002_at	GOLIM4	2.634	3.186	3.903	3.571	3.689	4.213	3.823	4.112	2.812	3.854	4.047	2.895	3.502	3.191	4.174	3.608	4.013	3.697	4.183	4.037	3.595	3.289	3.517	2.861	3.562	4.117	3.753	3.259	3.476	3.507	2.96	3.869	3.274	3.436	4.215	3.982	3.993	3.785	4.648	4.039	3.302	4.308	2.911	3.904	4.324	3.934	4.054	3.531
1555913_at	GON4L	5.371	5.16	4.82	5.346	4.034	3.736	4.645	5.45	3.915	5.347	3.752	5.189	5.219	6.654	3.64	6.222	5.095	5.613	6.008	4.861	5.139	4.019	4.555	6.153	6.173	4.587	4.944	5.695	4.337	4.974	4.34	3.036	6.615	5.43	5.192	3.995	4.975	3.045	4.53	3.038	5.66	3.398	3.333	5.088	4.207	4.725	3.69	4.691
223273_at	GON7	4.04	4.924	5.144	5.053	4.637	6.531	4.277	5.337	4.971	6.035	5.916	4.342	5.386	4.68	5.333	5.42	5.161	5.707	5.024	4.876	5.801	5.541	5.096	4.833	5.194	6.208	5.4	4.877	4.302	4.755	4.354	5.032	3.77	5.15	6.461	5.101	5.689	5.85	6.101	5.83	4.861	6	4.763	5.15	5.192	6.049	6.05	5.003
220336_s_at	GP6	6.096	5.668	6.812	6.293	6.586	5.457	6.33	6.164	6.622	5.937	5.55	6.287	5.95	6.57	6.092	6.024	5.827	6.183	5.978	5.712	7.212	5.78	5.872	6.953	6.39	5.536	6.487	7.681	6.381	5.796	5.778	6.025	6.599	5.123	5.983	5.771	6.268	6.223	5.23	5.452	6.366	4.58	6.319	6.472	5.443	5.394	6.319	6.372
225424_at	GPAM	3.087	3.566	3.89	3.884	3.741	4.88	3.096	3.932	3.633	4.608	4.661	2.745	3.4	3.425	3.872	3.831	3.686	4.245	3.825	3.183	3.168	3.475	3.957	2.474	3.17	4.416	4.098	3.363	2.968	3.174	3.096	3.979	3.395	3.718	4.788	4.505	4.56	4.093	4.444	4.258	3.241	5.106	3.249	3.42	4.84	4.245	4.542	3.292
235557_at	GPAT2	4.909	5.095	5.278	5.179	4.934	6.879	5.285	4.236	5.529	4.58	4.384	5.724	5.751	5.892	6.363	5.164	5.579	6.673	4.671	6.178	5.681	5.757	6.07	4.607	5.512	5.641	5.252	5.548	4.269	4.961	4.888	4.326	5.669	5.418	5.162	5.077	5.561	5.042	5.537	4.819	5.451	4.651	6.15	6.83	5.626	5.589	5.162	5.295
219078_at	GPATCH2	3.239	3.391	3.314	3.783	3.241	4.831	3.646	3.974	3.518	4.098	3.854	3.65	3.568	3.846	4.636	3.859	3.752	4.434	3.474	3.414	3.822	3.652	3.553	3.662	3.79	3.594	3.977	3.57	3.306	3.614	3.478	4.395	3.476	3.492	4.299	3.784	3.993	4.058	4.648	4.438	4.106	4.247	3.933	4.058	3.99	4.456	4.459	4.412
236026_at	GPATCH2	1.956	2.57	2.542	2.651	3.12	3.609	2.515	2.652	2.116	3.126	3.068	2.16	2.971	2.703	2.847	2.539	2.85	2.782	3.003	2.876	2.741	2.971	2.772	2.193	2.572	3.9	2.947	2.499	2.717	2.565	2.438	3.272	2.334	2.607	3.919	3.096	3.174	2.957	3.107	3.044	2.447	3.742	2.255	3.312	2.849	3.627	2.896	2.723
239768_x_at	GPATCH2	2.163	2.129	2.256	2.498	2.559	2.221	2.495	2.415	1.717	2.3	2.779	2.236	2.108	2.046	2.343	2.055	2.173	2.186	2.22	2.02	1.851	1.993	2.166	2.01	2.012	2.27	2.218	2.355	1.95	2.044	2.038	2.085	2.165	2.212	2.342	2.082	2.553	2.019	2.583	2.377	2.316	2.662	1.801	2.075	2.186	2.039	2.334	2.009
242224_at	GPATCH2	2.684	2.785	3.007	3.02	3.019	3.728	2.696	3.502	2.743	4.059	3.55	2.644	3.306	2.419	3.161	3.021	3.328	2.982	3.321	3.298	2.901	2.58	3.067	2.65	3.105	3.594	3.571	2.613	3.179	3.063	2.764	3.437	2.806	3.613	3.547	3.437	3.457	3.629	3.554	3.32	3.251	4.1	3.09	2.81	3.171	3.564	3.178	2.77
243704_at	GPATCH2	2.059	2.08	2.236	2.107	2.148	2.356	1.756	2.278	2.098	2.593	2.447	1.979	1.962	1.976	2.277	2.277	2.211	2.397	2.37	2.205	2.133	2.701	2.533	2.284	2.118	3.098	2.298	2.069	2.229	2.074	1.771	2.352	1.831	1.605	2.833	2.324	2.462	2.545	2.482	2.791	2.351	2.965	2.096	2.342	2.228	2.782	2.902	1.991
231970_at	GPATCH2L	2.984	3.022	2.965	3.106	3.017	3.268	3.255	3.398	2.931	3.378	3.459	2.72	2.967	2.321	2.864	2.884	3.269	2.955	3.653	2.933	2.947	2.956	3.058	2.573	2.818	3.194	3.448	2.781	3.002	2.677	2.891	3.176	2.411	2.857	3.974	3.629	3.159	3.56	3.917	3.184	3.156	4.392	2.62	3.174	3.571	2.927	4.196	3.022
235302_at	GPATCH2L	4.289	4.999	4.984	5.19	5.087	6.321	4.813	5.017	4.743	5.822	6.446	4.273	4.988	4.175	5.048	4.989	5.451	5.847	5.41	4.804	5.508	5.257	5.315	4.475	4.425	5.892	5.896	4.836	4.756	5.002	4.756	5.029	4.35	5.331	5.878	6.032	5.733	5.652	5.861	5.641	4.607	6.326	4.548	5.11	5.4	5.88	6.238	5.355
239478_x_at	GPATCH2L	2.991	3.66	3.373	3.315	2.915	3.796	2.966	3.671	3.267	3.483	2.983	2.931	3.24	3.152	3.533	3.127	3.018	3.386	4.22	3.19	3.158	2.821	3.171	3.126	3.1	3.467	3.247	2.933	3.251	2.836	2.683	3.507	3.301	4.024	3.698	3.288	3.006	2.985	3.263	2.645	2.611	3.128	2.613	2.03	3.096	3.026	2.996	3.399
230492_s_at	GPCPD1	5.325	5.698	6.069	5.709	5.147	7.042	5.88	5.328	5.778	6.655	6.083	4.961	5.312	5.813	5.96	5.742	6.172	5.949	6.643	5.034	6.649	5.452	5.15	4.721	5.854	5.627	5.653	5.117	5.664	4.908	4.405	5.854	4.878	5.782	6.514	5.54	5.847	6.285	6.335	5.721	5.3	5.736	4.455	5.751	5.715	5.932	6.089	5.914
220901_at	GPR157	3.918	3.319	3.053	3.163	3.711	3.302	3.742	3.671	3.481	2.976	3.684	3.238	3.2	3.281	3.818	3.41	3.691	3.085	3.938	3.209	3.611	3.251	3.421	3.48	4.071	3.648	2.719	3.226	3.596	3.8	3.849	3.184	3.611	3.264	3.195	2.7	2.649	3.312	2.952	3.572	3.236	3.72	3.726	3.557	3.186	3.244	2.986	3.016
224285_at	GPR174	2.102	2.291	2.543	2.825	2.198	3.28	1.984	2.571	2.435	2.638	3.289	2.286	2.413	2.129	2.383	2.93	2.206	2.923	2.324	2.331	2.441	2.821	2.329	1.93	2.698	2.964	2.201	2.844	2.125	2.21	2.385	2.254	2.044	3.114	4.861	2.918	3.121	2.778	3.69	3.165	2.867	3.301	2.387	2.693	3.191	3.726	3.27	2.517
1556019_at	GPR180	2.216	2.265	2.2	2.529	2.156	2.273	2.677	1.925	2.353	2.104	2.384	1.808	2.217	2.157	2.16	2.063	2.303	2.524	1.834	2.442	2.325	2.469	2.376	2.061	2.266	2.447	2.255	1.978	2.142	2.298	1.993	2.39	2.087	2.122	2.457	2.068	2.17	2.594	2.649	2.575	2.303	2.603	2.537	2.069	2.015	2.349	2.372	2.497
1556021_at	GPR180	2.699	2.515	2.965	2.977	3.009	2.963	2.911	3.609	3.112	2.847	2.91	2.522	2.828	2.212	2.812	2.995	2.974	3.345	2.78	2.348	2.166	2.582	3.057	2.172	2.633	3.152	2.826	2.738	2.663	2.7	2.556	2.924	2.616	2.914	2.965	2.953	3.453	2.894	3.588	3.158	2.646	4.046	2.415	2.354	3.196	2.841	2.759	2.592
1566256_s_at	GPR180	2.186	2.324	2.138	2.153	2.243	2.498	2.559	2.092	2.314	2.366	2.194	1.876	1.875	1.97	2.211	2.728	2.364	2.562	2.145	2.358	1.985	2.285	2.281	1.99	1.955	2.492	1.968	1.938	2.065	2.314	2.181	2.409	2.043	2.193	2.052	2.369	2.181	2.194	2.353	2.288	1.866	2.864	2.412	1.71	1.933	2.194	2.262	2.372
1566257_at	GPR180	3.891	3.797	4.168	4.087	4.364	4.706	4.433	4.618	3.918	4.428	4.353	3.145	3.914	3.935	4.076	4.26	4.323	4.303	4.373	3.934	3.603	4.278	4.268	3.597	3.234	4.933	4.036	3.681	3.646	4.223	3.388	4.27	4.029	4.241	4.409	4.214	4.476	3.899	4.595	4.502	3.557	5.399	4.039	3.483	4.646	4.152	4.457	3.796
231871_at	GPR180	2.232	1.888	2.6	2.501	2.356	3.552	2.644	2.477	2.26	3.374	3.435	2.536	2.749	2.564	3.056	3.013	2.563	3.482	2.707	2.947	2.658	2.583	2.808	2.294	2.382	3.908	2.909	2.612	2.327	2.631	2.265	3.464	2.662	2.632	4.267	3.061	2.981	3.481	3.348	3.497	2.333	4.3	2.218	2.266	2.949	3.085	3.562	2.669
232912_at	GPR180	2.373	2.861	2.747	2.712	3.026	3.254	2.318	3.238	3.202	2.843	2.654	2.686	3.02	2.778	2.349	2.69	3.059	2.776	2.723	2.764	2.558	2.72	3.008	2.902	3.042	3.122	2.486	2.755	2.438	3.572	2.768	2.519	3.167	2.876	2.909	3.337	2.615	2.122	2.905	2.408	2.964	2.938	2.72	2.794	2.982	2.543	2.739	3
211249_at	GPR68	2.457	2.498	2.726	1.962	2.149	2.261	2.614	2.235	2.596	2.118	2.603	2.579	2.323	2.205	2.106	2.257	2.298	2.191	2.31	2.151	2.196	2.122	2.222	2.236	2.491	2.231	2.268	2.069	2.553	2.914	2.508	2.59	2.183	2.348	2.323	2.369	2.152	2.343	2.217	2.126	2.279	2.319	2.303	2.683	2.197	2.263	2.242	2.118
1556697_at	GPRIN3	1.934	1.955	2.292	2.283	2.466	2.07	2.25	2.243	2.401	2.526	1.872	2.134	2.243	2.079	2.056	2.658	2.382	2.271	2.06	1.914	2.173	2.336	1.882	1.685	1.867	2.355	2.165	2.294	2.294	1.981	2.097	2.252	1.896	2.07	2.465	2.354	2.528	2.372	2.418	1.998	2.046	2.372	1.831	2.198	2.47	2.349	2.222	2.165
1556698_a_at	GPRIN3	3.487	3.586	3.928	4.195	3.796	4.111	3.394	3.958	3.702	4.384	4.699	3.461	3.876	3.228	4.255	4.211	3.472	4.455	4.015	3.881	3.843	4.039	3.715	3.195	3.613	4.081	3.863	3.501	3.384	4.008	3.012	4.147	3.267	3.633	4.985	4.836	4.587	4.427	4.716	4.684	4.029	4.709	3.554	3.907	4.876	4.655	4.315	4.248
238378_at	GPRIN3	2.882	3.94	4.179	4.63	4.212	4.83	3.817	4.895	4.165	4.302	4.005	3.002	4.191	2.889	4.536	4.564	3.888	4.686	4.573	4.185	4.398	4.841	4.423	3.398	4.162	4.826	4.401	3.812	3.981	3.711	3.497	3.913	4.074	4.038	4.916	4.47	4.488	4.099	4.221	5.161	3.825	5.199	3.93	3.455	4.685	4.593	4.126	4.345
218706_s_at	GRAMD2B	3.134	3.605	4.037	3.723	3.952	4.639	3.716	4.274	4.221	4.364	4.288	3.308	3.857	3.666	4.435	4.523	3.783	4.738	3.826	3.741	3.664	3.645	4.108	3.305	3.241	4.169	4.661	4.066	3.746	3.452	3.801	3.68	3.916	3.638	5.121	4.411	5.145	4.353	4.552	4.461	3.793	5.589	3.441	3.325	4.51	4.34	4.629	3.136
238049_at	GRAMD2B	4.071	4.606	4.184	4.424	3.735	4.023	3.783	4.497	4.736	3.98	3.794	2.736	3.985	3.792	4.589	4.287	4.086	4.274	3.907	4.752	3.516	4.513	4.385	3.749	3.917	4.911	4.338	3.804	4.101	3.946	4.084	4.7	3.901	4.195	4.26	3.777	4.162	3.776	4.134	5.011	4.116	5.263	4.483	3.257	4.342	4.248	4.304	3.273
209409_at	GRB10	5.745	5.3	5.279	5.838	5.925	5.76	5.138	6.915	5.241	4.741	5.51	5.954	5.302	5.274	5.636	3.997	6.111	5.165	5.758	4.94	5.45	5.266	5.729	5.42	6.704	5.299	5.42	5.65	5.812	4.932	5.37	5.295	5.028	5.087	4.994	5.908	4.912	6.028	4.942	5.275	4.8	5.314	5.561	6.377	5.179	5.198	5.228	5.519
209410_s_at	GRB10	4.34	4.635	4.61	4.522	4.393	4.07	4.561	4.876	4.543	4.488	4.339	5.465	4.293	4.601	4.776	3.745	4.978	4.272	4.837	4.362	4.368	4.542	5.099	4.537	6.962	3.764	4.467	4.785	4.766	4.649	4.684	4.08	4.708	4.457	4.012	4.623	4.468	4.876	4.344	4.165	4.468	4.029	5.219	5.543	4.054	4.418	4.212	4.409
210999_s_at	GRB10	4.51	4.556	3.693	5.017	4.938	4.459	4.863	5.35	4.044	3.756	4.14	5.337	4.361	4.49	4.329	3.878	5.415	4.105	4.721	3.986	4.786	4.352	4.956	4.576	6.02	4.007	4.613	5.267	4.867	4.538	4.36	4.347	4.378	4.344	3.145	4.485	3.754	4.728	3.91	3.904	4.369	3.71	5.185	5.995	3.902	4.037	3.819	3.968
215248_at	GRB10	3.296	2.763	2.802	3.533	3.116	3.36	3.264	4.6	3.042	2.979	2.724	3.753	3.238	3.964	2.873	2.77	4.099	2.648	3.693	3.177	3.408	2.704	3.027	3.591	5.048	2.804	2.82	2.748	3.025	3.744	3.027	2.743	3.897	2.908	2.524	2.897	2.768	2.553	2.628	2.587	3.048	2.467	3.076	4.357	2.852	2.477	2.275	2.747
222830_at	GRHL1	2.82	2.973	3.355	2.928	2.671	3.191	3.104	2.666	2.707	3.089	3.586	2.428	2.707	2.978	2.757	2.89	2.409	3.423	3.176	2.982	3.875	2.604	3.572	2.714	2.505	3.096	3.571	3.368	3.383	3.515	2.56	3.142	2.802	2.816	3.014	3.301	3.81	4.788	3.734	3.076	2.855	3.293	3.506	3.196	3.281	3.321	4.514	3.474
1565846_at	GS1-124K5.11	3.514	2.935	3.461	3.792	2.993	2.362	3.575	3.528	3.139	3.249	3.481	3.882	3.253	3.375	2.978	2.8	2.865	2.639	2.656	3.421	3.081	3.111	3.692	2.823	2.676	3.434	3.373	2.764	4.082	3.633	3.154	3.834	2.798	3.193	2.776	3.186	2.828	2.895	3.185	2.82	3.018	2.491	3.668	3.136	3.404	2.706	3.003	3.076
215659_at	GSDMB	4.172	3.588	4.737	4.477	3.883	3.831	3.973	3.98	4.159	4.838	4.296	3.694	4.101	3.941	4.066	4.361	4.1	4.335	4.2	2.891	4.136	3.684	4.319	4.046	4.185	5.582	3.249	4.2	4.451	4.209	4.288	3.06	4.543	4.329	4.186	4.598	4.367	3.883	4.421	4.131	4.581	4.212	4.161	4.238	4.116	4.59	4.469	3.747
240701_at	GSDMB	3.997	4.023	4.566	3.85	4.14	3.731	4.255	3.157	4.822	4.674	4.137	3.87	3.862	3.595	3.849	4.098	4.214	3.813	4.055	3.842	3.818	3.99	4.685	4.483	3.855	4.157	3.494	4.311	4.243	4.031	4.214	3.681	3.693	3.434	3.773	3.87	4.443	3.675	4.147	4.377	4.451	3.856	4.038	4.559	3.657	4.346	4.091	4.521
227925_at	GSEC	5.641	5.442	4.33	6.738	6.477	6.415	6.588	5.584	4.939	4.582	5.24	6.564	6.17	4.996	4.752	4.806	5.524	4.352	5.445	4.769	4.604	5.277	5.052	4.829	5.402	4.92	4.926	4.946	5.306	4.705	5.049	5.626	4.514	4.977	4.591	4.414	4.457	5.967	5.763	4.887	5.222	4.355	5.612	4.317	5.096	4.106	4.549	6.669
230999_at	GSEC	6.296	5.826	5.102	7.371	5.858	5.949	6.108	6.499	4.935	5.303	5.627	6.76	6.826	5.402	4.829	5.1	5.475	4.615	6.256	4.678	5.292	5.032	4.674	5.512	5.154	5.931	5.221	5.547	5.379	4.891	5.158	5.235	5.031	5.085	5.099	5.489	4.697	5.948	5.489	4.672	5.909	4.851	5.124	5.092	5.291	4.328	5.162	6.215
202967_at	GSTA4	3.648	3.937	3.836	3.799	3.82	4.549	3.975	4.437	4.143	4.369	4.529	3.819	4.138	3.547	3.919	4.618	3.544	4.713	4.03	4.089	4.039	4.939	4.576	4.106	4.355	3.762	4.115	4.401	3.615	3.955	3.904	3.991	4.239	3.633	4.127	4.205	4.089	4.061	3.829	4.963	3.976	4.259	4.13	4.516	4.674	4.624	4.369	4.092
235405_at	GSTA4	4.065	3.72	4.199	3.39	4.613	4.062	3.848	3.998	4.481	4.501	4.186	3.815	3.973	3.688	3.542	4.323	3.962	3.811	4.221	4.51	3.816	4.357	4.308	3.975	4.513	3.988	3.494	3.845	3.005	3.943	3.587	3.762	4.317	3.749	3.911	3.667	3.645	3.32	3.769	3.946	3.623	4.133	3.721	3.666	4.389	3.922	3.762	4.083
204550_x_at	GSTM1	3.949	3.863	5.233	4.425	4.966	4.181	4.9	5.203	4.726	4.56	4.151	4.685	3.949	3.857	3.751	4.768	4.288	4.065	4.482	3.989	4.437	4.884	4.804	5.275	4.209	4.181	3.864	3.974	3.958	5.173	5.955	3.915	5.097	4.407	4.069	5.786	5.344	4.7	5.475	4.778	4.565	5.097	4.496	4.56	3.931	4.517	5.584	4.717
215333_x_at	GSTM1	4.306	4.277	5.201	4.546	5.667	4.331	5.147	5.405	4.953	4.708	4.14	5.117	4.134	4.262	3.961	4.841	4.636	4.157	4.483	4.184	4.639	5.137	4.93	5.431	4.437	4.414	3.85	4.493	4.218	5.012	5.857	4.018	5.139	4.689	4.38	5.882	5.231	4.506	5.436	4.717	4.752	5.168	4.745	4.711	4.269	4.517	5.732	5.102
204149_s_at	GSTM4	2.347	2.953	3.454	2.32	3.574	2.642	2.937	3.674	2.207	2.419	2.383	3.007	2.403	2.732	2.503	3.128	3.061	3.184	3.027	3.063	2.415	2.416	2.69	3.443	2.491	2.677	2.328	2.721	2.218	2.796	4.019	2.663	3.175	2.976	2.991	3.702	3.372	3.215	4.126	3.842	3.277	2.923	2.688	2.39	3.26	2.526	3.459	2.834
210912_x_at	GSTM4	4.132	4.318	5.513	4.597	5.187	4.846	5.405	5.348	4.078	4.76	4.305	4.237	3.915	4.619	4.499	4.883	4.925	4.889	5.071	3.731	4.534	5.344	5.388	5.088	4.656	5.084	4.634	4.254	3.252	4.578	5.646	4.152	5.237	5.14	4.908	5.58	5.06	4.626	5.028	5.475	4.644	5.238	4.196	4.592	4.377	4.117	5.484	5.283
203815_at	GSTT1	3.643	3.799	5.341	3.551	4.245	2.25	5.486	4.615	2.939	3.731	3.7	5.137	4.309	3.951	4.778	2.698	2.386	3.63	2.325	4.769	3.787	4.273	3.712	3.614	3.2	4.555	3.715	4.572	3.73	4.16	2.805	3.952	5.173	4.743	2.86	2.715	2.518	2.59	4.01	2.509	3.729	3.689	4.715	4.248	2.033	2.669	5.011	4.129
232193_at	GSTT1	2.886	2.789	4.079	2.606	2.896	2.087	2.937	3.273	2.206	3.082	2.373	3.273	2.853	2.778	3.119	2.499	2.409	2.821	2.581	3.471	2.785	2.484	2.721	2.806	2.123	3.026	2.915	3.286	2.579	2.824	2.365	2.473	3.419	2.903	2.151	2.503	2.222	2.271	2.374	2.268	2.865	2.987	2.934	2.538	2.048	2.25	3.342	2.751
239346_at	GTF2H3	4.463	4.798	5.299	4.794	5.001	5.907	4.82	5.58	5.017	5.666	5.213	3.225	4.888	4.7	5.226	5.312	5.173	5.182	5	5.079	4.888	4.911	5.253	3.902	5.244	5.995	4.887	4.185	4.845	4.442	4.144	5.409	4.576	5.218	5.995	4.653	5.088	4.639	5.333	5.169	3.745	5.963	3.649	4.409	5.647	5.129	5.606	4.999
1557289_s_at	GTF2IRD2	5.66	5.647	5.897	5.985	5.024	4.56	5.23	6.444	5.519	5.569	4.816	5.8	5.887	6.241	4.771	5.835	5.238	5.603	6.078	5.348	5.533	4.631	5.721	5.919	5.949	6.262	5.452	5.422	5.068	6.271	4.943	4.571	6.643	5.677	4.854	4.91	5.268	4.382	4.864	4.923	5.675	4.542	4.926	5.338	5.401	4.966	3.706	5.1
205274_at	GTPBP1	3.418	2.998	3.071	2.586	3.043	3.152	2.403	2.898	3.308	3.085	3.229	3.006	2.925	3.102	3.25	2.826	3.15	2.785	2.948	3.466	2.782	3.058	3.193	2.753	2.512	3.014	2.797	3.067	3.018	3.974	3.783	3.349	2.962	3.103	3.79	3.402	3.451	3.777	3.3	3.294	2.937	3.231	3.672	3.336	2.771	3.014	3.17	3.09
226359_at	GTPBP1	3.614	3.318	3.321	3.389	3.982	3.205	3.285	2.51	3.315	2.907	3.493	3.681	3.011	3.645	2.604	3.167	3.43	3.43	3.252	3.159	3.453	3.997	3.113	3.384	3.192	2.908	3.247	3.756	3.476	3.695	3.81	3.537	3.555	3.433	3.442	3.562	4.132	3.321	3.563	3.586	3.953	3.475	3.572	3.608	3.518	2.872	3.352	3.635
227711_at	GTSF1	4.681	4.762	4.525	4.61	5.954	5.778	5.297	4.572	5.362	5.141	5.222	5.03	4.724	4.886	5.21	5.104	4.634	5.13	4.766	4.469	5.748	6.094	4.798	5.001	5.731	5.38	5.251	5.248	4.759	6.406	5.051	5.024	5.497	4.743	6.236	5.851	5.811	5.699	5.555	6.145	4.536	6.608	5.375	5.94	5.501	5.388	5.676	5.368
203817_at	GUCY1B1	4.979	5.053	6.803	5.312	6.092	5.759	5.248	5.778	5.618	5.565	6.748	4.855	5.21	5.237	5.711	5.566	5.049	6.158	5.432	4.832	5.992	6.532	5.521	5.004	4.931	5.139	6.435	6.508	6.216	4.528	4.374	6.323	3.804	3.105	5.996	6.493	6.353	7.004	5.805	6.306	5.547	5.157	5.497	5.92	6.054	5.67	7.211	5.266
211555_s_at	GUCY1B1	2.524	2.369	3.839	2.669	2.261	2.226	2.208	3.035	2.641	2.889	3.043	2.18	2.609	3.007	2.421	3.311	2.03	3.27	3.088	2.433	3.17	2.327	2.521	2.691	2.59	2.404	2.917	3.441	2.857	2.36	2.016	2.374	2.39	2.648	2.876	3.227	3.261	3.333	2.839	2.468	2.929	2.379	2.698	2.886	3.156	2.693	3.16	2.245
213621_s_at	GUK1	4.281	4.313	4.302	4.085	4.85	4.062	4.341	3.687	4.818	4.185	4.159	5.236	3.938	4.591	4.019	4.796	4.756	3.849	3.88	4.248	4.36	4.83	5.016	4.724	4.24	4.289	4.46	3.827	4.65	4.636	3.932	5.098	3.566	3.815	4.28	4.403	3.498	4.389	3.464	3.884	4.305	3.833	4.586	5.818	3.711	6.602	4.301	4.223
243909_x_at	GUSBP4	3.554	3.181	3.537	3.059	3.69	3.591	3.114	3.195	3.649	3.428	3.661	3.485	3.37	3.226	3.038	3.157	3.238	3.383	3.198	3.131	3.343	3.619	3.28	3.399	3.232	3.423	3.207	3.023	3.032	3.687	4.07	3.085	3.327	2.548	3.378	3.6	3.923	4.349	3.483	4.232	3.757	4.378	3.439	3.635	3.809	4.042	3.679	3.531
1562364_at	GVINP1	3.427	3.237	3.872	5.02	3.01	2.88	3.381	4.712	2.56	3.395	3.391	4.118	4.027	4.518	2.28	4.147	3.124	4.02	3.777	3.435	3.069	2.953	3.222	3.184	3.941	4.205	2.41	3.749	2.536	3.143	2.42	2.353	4.511	3.752	4.332	3.136	3.455	2.74	3.928	2.689	4.136	3.257	2.411	3.54	3.204	3.666	2.676	2.952
205488_at	GZMA	6.136	7.038	7.741	8.428	8.892	9.679	7.933	7.523	8.148	9.709	9.193	7.673	8.371	7.626	8.835	9.165	8.397	9.069	8.128	8.419	9.653	8.829	7.728	7.707	8.94	9.557	8.47	7.597	7.635	8.599	7.214	8.384	7.741	8.235	10.728	8.614	9.608	7.964	9.794	9.122	8.795	10.015	7.914	8.914	9.301	9.785	9.124	8.931
206666_at	GZMK	6.561	8.334	6.969	8.009	8.369	9.096	7.951	7.709	8.05	8.805	8.862	6.866	7.354	7.629	8.474	8.235	8.054	8.399	7.767	7.758	9.246	8.294	8.487	7.725	8.686	8.075	8.998	7.755	7.735	7.838	7.667	7.488	7.593	7.237	10.577	7.934	8.827	7.094	9.664	9.538	8.003	8.572	8.065	7.587	8.261	9.133	8.923	8.311
207460_at	GZMM	5.153	5.679	5.846	5.903	6.423	6.369	6.106	5.544	5.753	6.303	6.032	5.699	5.549	6.167	5.528	6.326	6.512	5.708	5.579	5.902	5.88	5.211	4.92	5.619	5.447	6.017	5.99	5.519	6.218	6.425	6.414	5.817	6.147	6.146	6.447	6.22	6.858	5.451	6.536	6.463	6.606	6.8	6.146	6.084	6.095	6.641	6.144	5.639
217777_s_at	HACD3	4.397	4.931	5.226	5.536	4.196	4.895	4.662	5.707	4.649	5.45	5.425	3.946	5.396	5.276	5.064	5.632	4.711	5.626	5.747	4.881	4.979	4.458	5.128	4.245	5.129	5.762	4.412	5.429	4.681	4.223	3.538	4.44	4.775	5.525	5.714	5.387	5.452	3.732	5.571	4.023	5.255	4.611	4.161	4.89	4.863	5.906	4.022	4.64
217521_at	HAL	7.935	7.586	6.474	7.433	6.663	6.967	7.67	6.917	6.86	6.886	6.238	7.921	7.574	6.77	7.346	6.501	8.178	6.461	7.187	7.296	7.331	6.622	7.399	6.967	7.685	6.803	7.551	7.284	8.013	6.441	7.493	7.544	6.681	7.107	6.07	6.232	5.935	7.117	5.465	6.473	7.286	6.622	7.798	7.439	6.329	5.53	6.478	6.653
203138_at	HAT1	4.628	4.783	4.884	4.952	4.933	7.361	5.128	5.286	4.055	6.596	6.421	4.56	5.628	5.271	5.686	5.931	5.281	5.591	5.443	5.426	7.063	5.022	5	4.513	6.267	6.418	5.426	4.67	4.555	5.487	4.513	5.244	4.196	5.266	7.19	5.556	6.122	6.177	6.682	6.243	4.673	6.688	4.385	6.002	5.103	6.401	6.589	5.361
225297_at	HAUS1	3.279	4.205	4.495	4.554	5.068	6.788	4.563	4.385	4.438	5.639	6.215	3.945	4.801	4.123	5.011	5.266	4.687	5.1	4.459	4.994	5.621	4.886	4.806	3.535	6.175	6.119	4.709	4.303	3.673	5.044	4.268	4.8	4.142	4.528	6.04	4.796	5.744	5.637	6.007	5.908	4.789	6.038	4.451	5.973	5.037	6.022	6.152	4.675
209314_s_at	HBS1L	3.614	4.298	4.426	4.438	4.862	5.028	4.51	4.655	4.427	5.394	4.819	3.946	4.088	4.141	4.944	5.178	4.317	4.772	4.567	4.574	4.402	4.357	4.442	4.162	4.512	4.958	4.127	4.273	4.443	3.808	4.145	4.842	4.139	4.06	5.4	4.43	4.714	5.138	5.018	5.038	3.909	5.348	3.928	4.459	4.591	5.081	5.461	5.117
209315_at	HBS1L	4.356	4.937	5.09	4.704	4.647	5.46	4.633	5.193	4.859	5.367	5.367	3.931	4.292	4.221	5.116	5.095	4.795	5.743	5.514	4.126	3.565	5.046	4.58	4.704	3.826	5.871	4.962	5.01	5.01	4.211	4.382	4.698	4.624	4.347	5.083	4.852	4.65	5.178	5.161	4.929	3.943	5.573	4.284	3.802	5.271	5.072	5.526	4.483
240602_at	HBS1L	3.018	3.582	3.889	3.788	3.241	3.471	3.304	4.232	3.138	4.284	3.779	3.284	3.909	3.466	3.198	4.186	3.155	4.936	4.315	3.022	3.346	3.086	2.917	3.143	3.697	3.948	3.938	3.311	3.204	3.037	3.04	3.037	3.463	3.701	4.062	3.652	3.745	2.966	3.782	2.872	3.318	2.985	2.58	2.909	3.81	3.882	2.618	3.416
219484_at	HCFC2	3.435	4.307	4.667	4.982	4.481	5.468	4.442	5.211	4.205	5.428	5.185	4.093	4.753	4.923	4.671	5.268	4.778	5.397	5.08	4.757	5.141	4.626	4.718	4.405	5.304	4.978	4.808	4.786	4.764	4.53	4.231	4.877	4.243	4.793	6.033	4.62	5.397	5.207	5.568	5.455	4.311	5.334	4.274	4.861	4.919	5.423	5.293	4.704
235264_at	HCFC2	3.735	4.036	4.763	4.494	4.863	5.429	4.093	4.444	4.393	5.27	5.384	3.543	4.503	4.043	4.373	4.894	4.49	4.939	4.552	4.801	4.43	4.556	4.619	3.756	4.281	5.264	4.448	3.486	4.449	3.852	4.034	4.987	3.636	4.397	5.499	4.841	4.88	4.563	5.198	4.878	3.635	5.615	4.099	4.269	5.086	5.036	5.473	4.497
236326_at	HDAC7	2.53	2.952	2.512	2.692	2.367	2.364	2.383	2.835	2.411	2.436	2.822	2.343	2.61	2.271	2.611	2.405	2.276	2.433	2.474	2.162	2.565	2.503	2.045	2.63	2.587	2.462	2.482	2.747	2.561	2.555	3.039	2.295	2.853	2.339	2.181	2.555	2.274	2.457	2.215	2.105	2.623	2.098	2.561	2.664	2.432	2.284	2.257	2.208
226510_at	HEATR5A	5.737	5.848	6.256	5.833	5.412	6.46	5.665	5.993	5.645	6.567	6.069	4.538	5.544	4.744	5.814	5.928	6.236	6.369	6.198	5.712	5.681	6.064	5.895	4.915	5.14	6.177	6.07	5.293	6.143	4.078	5.318	6.192	4.941	5.836	5.961	5.735	6.022	6.231	6.151	5.893	5.136	6.463	5.058	5.193	6.2	4.916	6.022	5.78
227568_at	HECTD2	1.866	1.535	2.013	2.044	1.995	2.389	2.219	1.937	2.238	3.123	2.262	1.808	1.84	1.883	1.971	2.06	1.794	2	2.237	1.593	2.011	2.283	1.98	2.029	1.938	2.234	2.276	1.829	1.769	2.126	1.625	1.749	1.844	1.818	3.116	2.44	2.552	2.528	2.733	2.559	2.152	4.258	1.925	1.774	2.524	3.555	2.045	2.3
238803_at	HECTD2	1.941	1.681	1.742	1.959	1.656	1.949	1.895	1.667	1.701	2.026	1.971	1.767	1.877	1.685	1.984	1.769	2.264	1.839	1.815	1.848	1.791	1.709	1.822	1.889	1.86	1.874	1.476	1.744	1.824	1.754	1.579	2.156	1.788	1.951	1.951	2.029	1.915	1.879	1.643	1.702	1.701	2.169	1.713	1.784	1.955	1.781	1.81	1.761
1557529_at	HECTD4	3.399	3.735	3.444	4.985	3.522	2.765	2.886	4.85	3.696	3.984	3.726	4.278	3.76	4.487	3.049	4.648	3.792	4.546	4.363	3.376	3.886	2.885	3.108	4.214	4.712	3.514	3.638	4.175	3.336	4.136	3.022	3.279	4.49	4.1	3.902	3.989	4.226	2.987	3.741	2.786	4.128	2.972	3.14	3.605	3.175	3.862	2.929	3.616
1562785_at	HERC6	2.472	1.973	2.231	2.108	2.105	2.172	2.165	1.996	2.231	2.253	2.197	2.418	1.963	2.295	2.068	2.1	2.529	2.056	2.231	1.872	1.97	2.336	2.166	2.409	2.11	2.196	2.186	1.903	1.955	2.489	2.288	2.248	2.127	2.175	1.964	2.536	2.116	2.335	2.236	2.341	2.042	2.406	2.283	2.749	2.273	2.349	2.08	2.383
218839_at	HEY1	5.833	5.514	4.208	5.655	4.146	5.057	4.873	3.937	5.259	4.2	4.499	5.773	4.287	3.982	5.33	3.963	5.567	3.756	3.887	3.793	4.071	3.984	4.236	4.373	3.882	3.646	4.44	4.792	4.186	4.791	3.74	4.77	3.578	4.347	3.533	4.019	3.886	4.959	3.366	4.582	4.016	4.055	4.975	4.241	4.304	3.367	3.644	3.963
44783_s_at	HEY1	6.427	6.716	4.356	6.141	4.526	5.994	5.995	4.366	5.506	4.184	5.38	5.966	4.651	3.962	5.867	4.537	6.202	4.373	3.731	4.534	4.503	3.989	4.21	4.728	4.039	4.339	5.274	4.707	4.831	5.005	3.739	5.216	3.554	4.635	3.587	5.008	4.097	5.479	3.087	5.239	4.397	4.766	5.379	4.673	4.518	3.724	3.95	4.199
1553402_a_at	HFE	1.842	1.77	1.809	1.736	1.856	1.884	1.898	1.742	1.815	1.564	1.97	2.014	1.839	1.845	1.918	1.911	1.757	1.912	1.874	2.128	1.678	1.995	1.965	1.934	2.178	1.681	1.859	2.183	1.769	1.871	2.099	1.639	1.835	2.012	1.884	2.002	2.007	2.229	1.843	2.078	2.129	1.698	1.962	1.858	1.946	1.662	2.208	1.781
206086_x_at	HFE	3.108	3.002	3.034	2.777	2.748	2.641	3.245	2.643	3.028	2.671	2.98	3.375	3.23	3.141	3.026	2.692	3.128	2.844	2.473	2.923	2.841	2.815	3.191	3.239	2.717	2.402	2.459	2.838	2.987	2.73	3.088	2.878	2.677	2.864	2.982	3.414	2.957	3.315	2.942	3.2	2.719	2.581	3.017	3.106	3.224	2.752	3.088	3.41
211330_s_at	HFE	3.487	3.067	3.604	2.824	2.729	3.189	2.831	3.273	2.904	2.744	3.114	3.194	3.213	3.547	2.667	3.336	3.011	3.037	3.184	3.066	2.814	3.412	3.074	3.606	3.543	3.223	2.914	2.872	3.075	3.188	3.706	2.45	3.041	3.787	3.309	3.206	3.178	3.383	3.01	3.415	3.318	3.075	3.17	3.304	3.339	3.207	3.324	2.66
235754_at	HFE	4.064	3.822	3.693	3.265	3.772	3.545	3.302	4.344	3.264	3.519	3.604	3.696	4.465	3.776	3.359	3.455	3.287	3.569	3.627	3.379	3.627	3.07	3.472	4.068	4.386	3.697	3.591	3.373	3.426	4.497	4.517	3.547	3.617	3.433	3.627	3.019	3.544	3.044	3.29	3.753	3.522	3.402	3.471	4.023	3.703	3.627	3.527	3.399
209960_at	HGF	2.612	2.598	3.297	3.237	2.932	3.564	3.197	3.067	2.227	2.887	3.587	2.912	3.121	2.6	2.874	2.68	2.77	3.525	3.526	2.546	2.81	2.86	2.797	2.35	2.718	3.406	3.509	2.974	2.245	2.891	2.86	3.473	2.287	2.661	3.498	3.328	3.248	4.242	2.705	3.597	2.945	3.546	2.62	2.885	3.523	3.111	3.207	2.987
210755_at	HGF	2.112	2.128	2.217	2.16	1.912	2.166	2.187	2.332	1.899	2.209	2.329	2.397	2.527	2.139	1.939	2.07	2.804	2.33	2.364	1.973	2.255	2.1	2.214	2.208	1.987	2.114	2.137	2.413	2.326	2.262	2.364	2.15	2.124	2.185	2.373	2.255	2.185	2.206	1.869	2.559	2.22	2.088	2.39	2.331	2	2.113	2.406	2.46
210997_at	HGF	3.325	3.278	3.353	3.456	2.779	2.528	3.713	3.542	2.426	2.466	2.488	3.127	3.448	2.558	2.11	2.685	3.509	3.248	2.897	2.802	2.86	3.652	3.118	2.618	3.154	2.807	3.32	2.978	3.335	2.74	3.323	2.75	2.308	2.591	3.111	3.478	2.359	3.474	2.1	4.062	2.551	2.465	3.883	2.903	3.725	2.532	3.23	3.131
210998_s_at	HGF	3.101	3.628	3.306	3.366	3.156	2.758	3.716	3.007	2.523	2.828	2.942	3.64	3.549	3.215	2.908	2.728	3.854	3.164	3.034	2.917	3.08	3.06	3.199	2.933	3.258	2.893	3.179	2.746	3.176	3.189	3.493	3.033	2.76	3.004	3.062	3.065	3.046	3.578	3.172	3.534	3.894	3.175	3.482	2.573	3.194	2.988	3.385	3.461
232627_at	HGS	4.282	4.005	3.784	4.407	3.359	3.791	4.16	3.684	3.894	3.751	3.412	4.193	4.231	3.848	3.722	4.138	3.696	3.61	3.852	3.774	4.427	3.527	3.776	4.084	4.28	4.39	4.016	4.157	4.228	4.465	4.474	2.949	4.331	3.662	3.141	3.192	3.625	3.131	3.146	3.225	4.138	3.378	3.304	3.943	3.764	3.599	2.957	3.129
231955_s_at	HIBADH	3.219	3.167	3.429	3.384	2.941	3.11	2.691	3.258	3.35	3.881	3.439	2.015	3.403	3.302	3.293	3.276	2.587	3.748	3.504	2.94	3.104	2.901	3.152	2.922	2.673	3.914	2.874	2.943	2.776	2.698	2.728	2.788	2.703	3.536	4.026	3.334	3.647	3.331	3.753	3.293	3.191	3.904	3.074	2.862	3.584	3.578	3.122	2.891
234452_at	HIBADH	2.567	2.552	2.381	1.985	2.621	2.321	2.264	2.435	2.614	2.134	2.858	2.383	2.404	2.464	2.473	2.235	2.154	2.371	2.15	2.474	2.683	2.242	2.101	2.766	2.298	2.166	2.456	2.484	2.359	2.472	2.715	2.109	2.527	2.361	2.373	2.432	2.529	2.499	2.196	2.468	2.987	2.139	2.411	2.695	2.221	2.463	2.306	2.468
226533_at	HINT3	2.189	2.34	2.1	2.599	2.475	2.13	2.318	2.372	2.233	2.513	2.381	2.898	2.258	2.295	2.056	2.361	1.909	1.912	2.199	2.243	2.285	1.917	2.009	1.939	2.478	2.293	2.181	2.76	2.227	2.55	2.236	2.138	1.858	2.236	2.523	2.17	2.247	2.045	2.107	1.948	2.487	2.105	2.068	2.333	2.524	2.143	2.177	2.512
226537_at	HINT3	3.855	4.206	3.336	4.33	3.56	4.29	3.745	3.423	3.414	3.478	4.405	3.936	4.09	2.921	3.795	3.894	4.337	3.59	3.5	3.201	3.714	3.834	3.26	2.669	3.323	4.257	3.75	3.753	4.55	3.5	3.789	4.281	3.076	3.765	4.505	3.834	3.985	5.119	3.842	4.039	3.942	4.379	3.355	3.446	3.676	3.474	4.22	3.442
213763_at	HIPK2	5.177	4.606	4.995	5.059	4.049	3.808	4.491	4.389	4.021	4.255	4.501	5.69	4.765	5.387	3.745	4.488	4.606	4.6	4.418	4.447	5.31	4.238	4.456	4.649	4.751	4.614	4.138	5.036	4.413	5.476	4.733	3.843	5.267	4.498	3.933	4.857	4.602	4.232	4.121	3.512	5.24	3.716	4.251	4.956	4.002	4.533	4.022	3.98
219028_at	HIPK2	4.217	4.438	3.868	4.305	4.024	3.749	4.651	4.389	4.09	3.867	3.507	4.845	3.969	4.003	3.373	4.144	4.172	4.277	3.941	4.179	4.145	4.144	3.91	4.105	4.297	3.826	3.927	4.656	4.324	3.993	5.317	4.482	4.142	4.117	3.556	3.739	3.226	3.783	3.637	3.888	4.379	3.896	4.084	4.174	4.04	3.762	3.934	4.429
225115_at	HIPK2	6.029	6.023	5.708	7.028	5.401	4.319	4.798	7.272	5.362	5.243	5.187	6.975	6.434	6.416	5.156	5.855	5.231	4.989	5.822	4.955	6.283	4.482	4.937	5.873	5.161	5.653	6.06	5.945	4.767	6.101	4.843	4.864	6.222	5.184	4.433	4.794	4.885	4.027	4.986	4.496	6.269	4.171	4.722	5.683	5.415	5.091	4.236	5.197
233884_at	HIVEP3	4.031	4.497	4.492	6.164	4.517	4	4.117	6.196	4.865	4.779	3.656	4.418	5.399	4.615	4.409	5.08	4.621	5.096	4.755	4.674	4.428	4.331	3.345	4.844	5.257	5.048	4.324	4.387	3.764	3.934	4.042	4.188	5.261	4.597	5.637	4.554	4.839	2.721	5.158	3.951	5.133	4.332	4.067	4.119	5.877	4.456	4.206	5.253
235122_at	HIVEP3	4.41	5.145	6.049	6.419	5.513	5.888	6.278	6.23	5.363	5.106	4.904	4.431	5.136	4.689	5.574	5.643	5.299	5.566	5.415	5.633	4.98	5.983	5.595	5.212	5.931	5.685	5.288	5.16	5.021	4.65	5.654	5.948	5.617	5.974	7.294	6.001	5.95	5.979	6.142	6.12	5.59	6.073	5.358	5.33	6.892	5.486	5.406	6.503
244764_at	HIVEP3	3.483	3.545	3.94	4.098	3.814	3.591	3.748	4.377	4.047	3.852	3.31	3.344	3.64	3.223	3.921	4.128	4.42	3.937	3.339	4.039	3.756	4.335	3.72	3.726	3.671	4.172	3.956	3.334	3.348	3.572	3.677	3.601	3.783	3.58	5.211	4.036	4.243	3.956	4.988	4.423	4.021	5.174	4.418	3.007	4.917	4.434	4.296	4.155
203290_at	HLA-DQA1	6.54	6.345	7.642	6.393	7.614	3.751	7.429	3.99	3.624	3.78	3.847	3.5	3.851	4.28	8.121	3.847	4.183	3.707	7.842	7.819	6.989	3.984	4.102	4.137	7.608	4.082	3.97	8.595	6.6	3.631	3.723	3.875	3.722	8.007	4.128	6.957	7.727	8.5	9.382	8.182	3.847	6.959	7.317	4.101	8.466	3.947	3.74	8.255
213831_at	HLA-DQA1	2.754	9.08	2.511	8.125	8.985	2.641	2.811	9.145	9.712	9.303	9.238	8.983	9.129	8.809	9.431	9.418	9.382	10.368	9.357	9.512	2.86	10.337	9.829	10.028	9.491	9.641	9.032	2.681	9.823	10.157	10.412	9.612	10.222	3.168	9.752	8.962	2.695	2.743	2.396	9.833	9.846	8.595	2.699	9.276	2.585	10.362	9.667	2.052
236203_at	HLA-DQA1	1.579	5.095	1.751	3.962	5.279	1.878	2.318	5.578	5.302	5.852	5.124	3.346	4.791	5.645	6.213	5.81	6.069	6.749	6.629	6.352	1.86	5.843	5.562	6.229	5.168	6.259	5.048	1.96	4.133	5.353	4.212	5.843	6.086	2.244	5.91	4.11	2.195	1.771	1.922	4.878	5.386	5.542	2.047	4.068	1.964	6.583	5.591	2.284
1562381_at	HLA-F-AS1	1.714	1.637	1.777	2.088	1.686	1.642	1.831	1.631	1.801	1.454	1.684	1.964	1.599	1.962	1.92	1.753	1.91	1.752	1.848	1.7	1.763	1.675	1.676	1.68	1.881	1.912	1.809	2.07	1.761	1.722	1.712	1.83	1.706	1.995	1.855	1.794	1.817	2.113	1.742	1.917	2.082	1.625	2.003	1.672	1.912	1.747	1.99	1.714
222279_at	HLA-F-AS1	4.527	5.524	5.16	5.42	5.596	5.935	5.505	5.458	5.44	5.651	4.82	4.293	5.307	5.338	5.317	5.336	4.746	4.958	4.99	5.183	4.929	5.584	5.421	5.043	5.509	4.72	5.066	4.985	5.149	4.729	5.026	5.384	5.482	5.203	5.381	4.332	4.705	5.051	5.249	5.093	4.657	5.322	5.181	4.702	4.621	4.788	4.971	4.938
202983_at	HLTF	4.826	5.432	6.315	6.048	6.054	7.128	5.656	6.18	6.049	6.697	7.015	4.368	5.854	5.758	6.342	5.959	6.028	6.614	6.002	5.688	6.326	6.248	5.754	4.756	5.653	6.91	6.17	5.768	5.319	5.391	4.897	5.936	4.987	5.956	7.509	6.667	6.93	6.279	7.144	6.466	5.198	6.992	4.689	5.65	6.636	6.67	6.915	5.765
1558561_at	HM13	5.021	5.148	5.062	5.562	4.186	4.069	4.934	5.794	4.47	5.143	5.336	5.101	5.352	5.232	4.451	5.616	4.648	5.168	5.308	4.089	5.148	3.872	4.749	5.204	5.154	5.464	4.971	5.057	4.916	5.259	4.318	4.342	5.36	4.459	4.572	4.248	4.555	3.861	4.755	3.483	5.549	3.902	3.91	5.067	4.672	4.411	3.559	4.807
221750_at	HMGCS1	3.965	4.086	4.529	4.777	4.519	5.13	4.51	4.641	3.946	4.889	4.674	3.546	4.365	4.371	4.798	4.534	4.093	4.78	4.697	4.392	4.248	4.28	4.44	3.924	4.213	5.079	4.218	3.919	4.575	3.636	3.761	4.798	4.213	4.539	5.807	4.641	4.65	4.738	5.41	4.499	4.243	5.274	3.424	4.046	4.907	4.769	5.29	4.233
204110_at	HNMT	2.175	1.79	1.869	1.683	2.305	2.149	2.012	1.739	2.263	1.876	2.053	2.218	2.118	1.908	2.026	2.168	2.077	2.04	1.949	1.985	2.331	1.757	2.016	2.021	2.053	1.757	1.926	2.485	1.757	2.126	2.013	2.285	2.021	2.138	1.99	2.203	1.993	2.415	2.183	2.148	1.986	1.828	2.108	2.031	1.98	2.403	2.076	1.937
204112_s_at	HNMT	5.55	6.545	5.715	6.479	6.714	8.005	6.146	6.641	5.878	7.021	7.813	5.87	7.302	5.993	6.635	6.573	7.089	7.143	7.226	6.617	6.739	6.609	6.369	6.727	7.042	7.324	6.71	6.375	6.272	6.713	7.141	7.297	5.488	6.505	7.485	6.973	6.704	7.74	7.28	7.744	6.356	7.642	6.38	7.416	6.63	7.581	8.065	6.359
211732_x_at	HNMT	3.883	3.526	2.831	3.825	3.781	4.992	4.07	4.132	3.19	3.89	4.203	3.715	4.22	3.768	3.758	3.848	3.915	3.667	3.931	4.075	3.942	3.85	3.362	3.835	5.072	4.463	3.386	3.851	3.701	3.931	4.489	4.047	3.743	4.136	3.623	3.374	3.379	3.629	3.529	3.8	3.5	4.024	3.428	4.26	3.285	4.032	3.818	3.729
228772_at	HNMT	3.283	3.749	3.664	4.066	3.41	4.464	3.687	3.725	2.635	3.821	4.407	3.222	4.259	2.778	3.505	3.213	4.13	3.762	3.829	3.331	3.562	3.716	3.396	3.53	3.917	4.007	4.061	3.755	3.829	3.46	4.18	4.473	2.228	3.762	4.315	3.858	3.449	4.032	3.883	4.197	3.298	4.285	3.566	3.832	3.852	3.9	4.46	3.431
221480_at	HNRNPD	4.494	4.459	4.981	4.74	4.487	5.073	4.736	5.111	4.279	4.606	4.461	2.907	4.309	4.228	5.013	4.518	4.769	4.73	4.927	4.393	4.241	4.227	5.121	3.997	4.116	5.175	4.284	3.7	4.391	3.468	3.391	4.893	4.493	5.053	5.35	4.956	4.602	4.389	5.124	4.509	3.97	5.29	3.78	3.799	5.082	4.563	4.311	4.579
227744_s_at	HNRNPD	2.018	1.857	1.896	2.004	1.744	2.113	1.634	1.917	1.84	1.762	2.188	2	1.811	2.011	1.763	1.935	2.188	2.154	1.87	1.838	2.002	1.821	1.933	1.93	1.906	1.713	1.912	2.307	1.97	1.918	1.694	2.097	2.083	2.375	2.053	2.069	2.255	2.061	1.943	1.811	1.701	1.787	1.894	1.665	1.969	2.05	1.772	1.898
229129_at	HNRNPD	3.598	3.279	4.508	4.325	3.521	5.277	3.848	4.215	3.529	4.742	4.306	2.924	4.069	3.48	4.481	4.206	4.227	4.426	4.231	3.774	3.301	3.677	3.871	3.635	3.898	4.752	4.248	3.221	3.684	3.359	3.466	4.298	3.99	4.444	5.02	4.528	4.136	4.611	4.368	4.079	3.331	5.226	2.911	3.599	4.716	4.366	4.485	3.627
239040_at	HNRNPD	3.782	5.296	3.976	5.18	4.277	4.266	4.131	5.359	4.826	5.608	4.29	3.948	5.389	5.417	3.631	5.364	4.815	5.256	5.041	4.425	4.846	4.164	3.803	5.153	6.251	4.416	4.947	5.159	4.076	4.69	3.961	3.298	4.824	4.429	5.149	4.121	4.718	3.556	4.279	3.535	4.592	3.626	3.684	4.588	3.846	4.153	3.9	4.558
1556084_at	HNRNPM	1.972	2.014	1.858	1.998	1.723	1.906	1.767	1.878	1.82	1.919	2.26	2.234	1.996	2.375	2.056	2.04	1.802	2.155	2.226	2.031	2.122	1.831	1.876	2.099	1.69	1.959	2.023	1.862	2.299	1.893	2.26	1.854	1.604	1.886	1.713	2.37	1.842	2.015	1.823	2.195	2.336	1.947	2.175	1.847	2.029	2.04	1.869	2.06
214918_at	HNRNPM	4.614	3.827	4.741	4.121	4.052	3.904	4.275	4.548	3.912	4.143	3.849	4.355	4.212	4.118	3.828	4.516	3.834	3.916	4.498	4.173	3.847	3.148	3.935	3.88	4.463	4.952	3.494	3.643	3.738	4.802	3.876	3.885	4.149	3.523	3.234	3.613	3.111	3.826	3.331	3.836	3.658	4.374	3.879	3.75	4.17	3.352	3.768	3.369
219976_at	HOOK1	3.802	4.646	3.919	4.458	3.571	4.229	3.563	5.155	4.201	4.988	4.381	4.402	4.738	4.487	3.658	4.295	2.878	4.455	4.33	3.553	4.623	3.528	4.016	4.144	4.001	4.464	4.355	4.577	3.446	4.345	3.787	3.837	4.43	4.337	3.307	4.043	3.934	3.777	3.802	3.241	3.818	3.323	3.214	3.897	3.387	3.506	3.84	3.544
225792_at	HOOK1	2.802	3.192	4.108	3.661	3.449	5.346	2.759	4.202	3.503	4.93	5.04	2.745	3.527	3.533	3.812	3.669	3.185	4.625	4.149	2.676	3.588	3.362	3.411	2.116	3.509	5.019	3.576	3.962	3.236	3.715	3.137	4.032	2.754	2.847	3.442	4.305	3.944	4.411	3.709	3.945	2.228	5.211	2.953	3.243	2.845	4.135	4.932	3.162
1558315_s_at	HOOK3	2.369	2.216	2.208	2.001	2.192	2.346	2.477	2.084	2.139	1.594	1.683	2.494	2.392	1.998	2.066	2.222	2.089	1.787	1.968	2.117	2.617	1.933	2.225	2.236	2.065	2.375	1.794	1.945	2.583	2.265	2.352	2.382	2.158	2.345	1.705	1.469	1.646	1.492	1.634	1.753	2.173	1.994	2.045	1.845	2.469	1.758	1.744	1.924
228904_at	HOXB3	4.549	4.084	4.315	4.535	4.035	4.612	3.951	4.167	3.621	5.131	4.475	3.757	4.854	3.731	3.482	4.858	4.466	5.32	3.735	4.244	4.344	4.908	4.275	3.694	3.812	3.753	4.277	4.377	4.386	3.783	4.302	4.808	3.467	3.784	6.298	4.873	5.972	4.426	5.34	4.713	4.785	5.404	3.711	4.034	5.333	4.249	5.133	4.644
206863_x_at	HRK	2.884	3.035	2.56	2.687	2.931	3.152	3.477	2.499	3.319	2.781	2.697	2.956	2.638	3.16	2.951	3.015	3.069	2.565	3.272	3.306	3.638	3.397	3.048	2.852	3.051	2.687	3.11	3.372	3.121	3.043	3.011	2.854	3.392	3.034	3.18	3.135	2.763	3.098	2.86	2.567	3.015	2.689	3.415	2.982	2.849	2.742	2.969	3.677
206864_s_at	HRK	3.185	3.619	3.083	3.877	4.095	3.91	6.214	3.482	4.087	3.018	3.15	4.165	3.19	3.376	3.374	3.952	3.677	3.816	3.676	3.375	4.624	4.105	3.961	4.362	4.97	3.746	3.138	3.619	4.263	4.428	4.386	3.7	4.213	4.049	3.347	3.519	3.722	3.255	3.268	3.636	3.899	3.719	3.778	3.469	3.444	3.644	3.263	3.611
237187_at	HRK	3.218	3.039	2.98	3.287	3.946	3.138	5.798	3.801	4.107	2.855	3.097	3.512	3.117	3.399	3.48	3.466	3.401	3.31	3.525	2.993	4.044	3.598	3.354	3.756	4.082	3.72	3.013	2.998	4.232	4.103	4.111	2.891	4.227	3.683	3.209	3.296	3.367	3.109	3.005	3.547	3.416	3.329	4.157	3.485	2.963	3.471	3.088	2.954
205466_s_at	HS3ST1	3.03	3.045	4.277	3.655	3.213	4.289	3.952	4.368	4.234	3.573	3.363	2.777	3.393	3.628	2.94	4.073	4.081	3.963	3.645	4.319	2.303	3.936	4.165	2.594	3.852	4.787	3.271	4.733	3.298	3.743	1.964	3.722	3.277	4.88	2.17	2.96	2.916	2.744	3.011	2.92	2.663	3.592	2.272	2.765	3.671	4.207	3.038	3.121
213991_s_at	HS3ST1	2.698	2.636	2.437	2.423	2.83	2.579	2.577	2.193	2.526	2.577	2.601	3.19	2.332	2.706	2.675	2.603	2.478	2.577	2.432	2.267	2.565	2.685	2.687	3.393	2.645	2.444	3.148	2.825	2.612	3.19	2.426	2.663	2.417	2.848	2.755	2.897	2.453	2.467	2.928	2.7	2.539	2.767	2.851	3.14	2.267	2.626	3.088	2.786
211968_s_at	HSP90AA1	6.635	6.096	6.904	7.206	5.746	7.853	5.781	7.244	6.737	7.92	7.771	6.691	6.936	7.689	6.787	7.71	6.102	7.444	7.76	5.777	8.211	5.819	5.982	6.582	6.806	7.796	6.784	6.77	5.755	6.572	5.218	6.461	7.551	6.986	8.337	7.424	8.203	6.301	8.136	5.991	6.863	7.404	6.024	7.071	6.759	7.96	6.341	6.177
203960_s_at	HSPB11	2.65	2.855	2.838	2.81	3.35	4.971	3.264	3.199	3.093	3.393	3.776	2.433	2.934	3.091	3.295	3.3	3.036	3.297	3.049	3.589	4.06	3.558	3.025	2.649	3.877	4.187	3.177	3.205	3.21	3.354	2.817	3.072	3.056	3.031	4.992	2.937	3.656	3.485	4.356	3.894	2.971	4.19	3.211	3.672	3.071	4.336	4.062	3.067
214163_at	HSPB11	4.105	4.253	4.494	4.692	4.436	4.632	4.792	4.644	4.619	4.776	4.77	3.535	4.912	3.97	4.692	4.707	4.473	4.719	4.641	4.946	3.586	4.693	4.676	3.914	3.898	5.068	4.699	4.314	4.572	3.76	4.384	4.664	4.029	4.358	5.759	4.368	5.182	4.348	5.677	4.491	4.38	6.319	4.424	3.792	5.206	4.634	5.004	4.251
208744_x_at	HSPH1	5.509	6	5.714	6.995	4.786	5.53	5.245	7.278	5.447	6.145	5.807	5.91	6.483	7.125	4.902	6.55	4.983	6.521	6.568	4.788	6.386	4.642	4.993	6.19	5.769	5.704	5.293	6.409	4.617	4.939	4.618	4.738	6.692	6.197	6.882	6.7	7.049	5.123	6.745	4.592	6.205	4.896	4.399	5.674	5.178	6.216	5.225	5.886
235573_at	HSPH1	2.877	3.236	3.147	2.945	3.175	3.847	3.43	3.26	3.035	3.717	4.065	2.758	3.212	2.778	3.063	3.295	3.234	3.542	2.845	3.624	3.154	4.106	3.102	2.9	2.523	3.463	3.323	2.974	3.043	3.103	3.49	3.558	2.881	3.01	3.642	3.882	3.621	3.767	3.339	3.302	2.961	4.162	3.22	2.997	3.72	3.127	3.334	3.174
202601_s_at	HTATSF1	3.662	4.347	3.753	5.386	3.334	3.727	3.868	5.252	3.734	4.612	4.193	5.016	4.866	4.828	3.062	5.288	3.651	5.809	5.097	3.371	4.869	3.011	3.694	4.703	4.602	3.829	4.249	4.577	3.108	4.349	3.716	3.499	4.349	4.659	4.553	4.315	4.683	3.864	5.26	3.815	4.957	3.375	3.63	4.291	3.916	5.549	3.873	4.642
215513_at	HYMAI	5.459	5.169	5.635	5.515	5.231	4.903	5.976	5.265	4.669	4.636	4.661	5.391	5.6	4.693	5.1	4.611	5.595	4.869	5.224	5.462	4.793	4.99	5.391	5.171	5.234	5.553	4.709	4.606	5.93	5.329	5.426	5.908	4.99	4.929	4.103	4.969	4.616	5.164	4.044	4.948	5.378	5.061	5.854	5.109	5.418	4.219	4.812	4.99
210970_s_at	IBTK	4.771	5.028	5.864	5.49	5.117	6.33	5.435	5.785	5.392	6.169	5.368	3.725	5.074	5.1	6.147	5.893	5.335	5.716	5.889	5.455	5.459	4.922	5.244	4.96	5.417	5.989	5.545	5.127	5.465	4.144	4.526	5.763	4.296	5.656	6.744	5.735	6.408	5.626	6.198	5.795	4.843	6.321	4.395	5.15	6.295	5.682	5.902	5.359
210029_at	IDO1	4.806	5.824	5.053	4.364	6.19	6.729	6.529	4.524	5.267	5.319	6.7	5.003	3.972	5.052	5.924	4.686	4.967	5.411	5.598	6.032	6.569	6.239	5.552	4.939	5.918	5.105	5.973	5.46	4.777	6.162	4.815	5.576	5.837	6.859	7.431	6.961	6.196	7.864	5.671	6.282	4.977	5.484	5.189	4.125	5.832	6.228	6.947	4.366
202438_x_at	IDS	3.174	2.797	3.08	3.329	2.958	3.06	2.977	2.887	2.651	3.007	2.657	2.878	3.464	2.878	2.584	2.526	2.782	3.014	3.095	2.644	2.826	2.807	2.195	2.203	2.285	2.841	3.075	2.782	3.378	1.838	2.225	3.499	1.964	2.618	3.39	2.881	3.109	3.308	2.986	2.691	2.729	2.949	2.736	2.691	3.408	2.668	2.863	2.583
211782_at	IDS	2.149	2.29	2.04	2.557	2.236	2.422	2.474	1.738	1.822	2.563	1.911	2.034	2.373	2.15	2.109	2.101	2.142	2.717	2.137	2.203	2.3	1.803	2.314	2.478	1.814	2.117	2.31	2.065	2.245	2.008	1.744	1.945	2.158	2.456	1.766	1.926	1.852	2.467	2.22	2.455	2.019	2.208	2.254	2.162	2.45	2.154	2.353	1.975
202411_at	IFI27	2.34	3.759	3.589	5.608	5.74	4.628	6.11	3.505	6.909	4.63	5.04	5.73	3.905	5.322	9.938	4.326	3.999	5.512	3.615	3.805	4.88	5.71	4.368	5.102	4.29	2.92	6.669	4.666	3.51	4.833	3.928	5.89	4.349	8.959	6.493	4.819	7.699	5.308	6.609	5.205	8.274	5.048	5.683	8.167	5.487	8.551	8.645	6.14
1558956_s_at	IFT80	4.503	4.981	5.758	5.948	5.923	7.174	5.83	6.257	5.566	6.475	5.791	3.926	5.995	4.941	5.949	5.992	5.503	6.187	5.828	5.911	5.614	5.923	5.855	4.183	5.353	6.098	5.344	5.163	5.522	4.785	5.309	6.223	5.173	6.018	7.15	5.917	6.42	6.678	6.989	6.056	5.07	7.502	4.099	5.195	6	6.525	7.043	5.314
1564231_at	IFT80	3.467	3.548	3.414	3.381	3.815	3.522	3.169	3.612	3.239	3.586	3.037	3.683	3.807	3.444	3.639	3.643	3.592	3.358	3.593	3.611	3.505	3.017	3.736	3.609	3.018	3.948	3.553	3.375	3.56	3.631	3.911	3.311	3.672	3.215	3.661	3.44	3.382	2.975	3.552	4.039	2.773	4.187	3.966	3.513	3.382	3.506	3.745	2.865
226098_at	IFT80	4.503	4.754	5.401	5.433	5.302	6.443	5.089	5.686	5.199	6.041	5.484	3.572	5.176	4.316	5.15	5.64	5.458	5.783	5.244	5.371	5.314	5.467	5.105	4.512	5.003	5.703	5.344	4.64	5.092	4.524	4.845	5.45	4.747	5.139	6.634	5.734	5.819	6.24	6.173	5.584	4.345	6.719	3.924	5.026	5.531	6.015	6.472	5.243
240251_at	IFT80	1.862	2.38	1.859	1.746	1.995	1.936	2.578	1.773	1.896	1.808	1.92	2.062	2.075	1.788	1.958	1.656	1.94	1.892	1.788	1.71	1.887	1.665	1.778	1.709	2.018	2.004	2.1	1.917	1.843	1.806	2.067	2.018	1.88	1.619	1.932	1.696	1.772	2.007	2.164	1.789	1.638	1.928	2.381	1.854	1.895	1.752	2.102	2.135
203820_s_at	IGF2BP3	2.698	3.041	3.53	3.872	4.559	3.519	3.316	2.845	3.482	3.738	4.384	3.766	3.34	2.835	3.972	3.884	3.581	3.787	2.672	2.929	4.509	3.704	3.043	3.126	4.003	3.392	3.664	4.098	4.011	3.538	2.932	3.696	3.035	2.578	3.968	3.835	4.328	5.448	5.015	4.435	3.299	3.092	3.778	3.922	3.693	4.075	4.658	3.564
216493_s_at	IGF2BP3	2.357	2.98	2.772	2.569	3.198	2.124	2.362	2.437	2.875	2.8	2.949	2.745	2.836	3.13	2.356	3.243	2.978	3.536	2.977	2.503	3.427	2.841	2.701	3.341	3.59	2.53	2.856	3.089	2.714	2.966	2.678	2.608	2.9	2.634	2.774	2.182	3.024	2.534	3.172	2.855	3.108	2.571	2.509	3.072	2.74	3.397	3.001	2.893
216491_x_at	IGHM	3.966	3.672	4.38	4.637	3.675	4.053	4.773	4.777	4.603	4.224	3.902	4.293	3.422	5.033	7.558	5.622	3.938	4.116	4.921	4.223	3.676	3.714	3.926	5.841	5.103	4.132	3.434	4.171	4.36	4.167	3.567	3.458	4.187	5.119	5.153	4.661	6.386	3.423	8.652	4.859	5.324	3.707	5.053	3.863	5.032	4.763	3.884	4.084
211908_x_at	IGK	4.519	4.575	4.557	4.31	4.603	4.147	4.836	4.469	4.483	4.418	4.254	4.788	4.146	4.685	5.587	4.931	4.158	4.234	4.708	4.3	3.978	3.918	4.199	5.431	4.332	4.244	4.15	4.282	4.71	4.625	4.59	4.658	4.529	4.45	4.614	4.677	5.538	4.326	5.796	4.74	5.224	3.908	5.264	4.619	4.842	4.727	4.597	4.557
211835_at	IGKC	2.75	3.041	2.96	3.022	2.874	2.834	3.639	2.896	2.886	2.928	2.613	3.077	2.694	3.108	3.347	3.301	2.923	2.956	3.081	2.889	3.029	3.039	3.266	3.931	2.967	2.946	2.766	3.121	3.2	3.345	3.081	2.704	2.88	3.232	3.055	2.829	3.485	3.016	4.594	3.762	3.743	3.083	3.478	3.207	3.294	3.002	3.122	2.957
214669_x_at	IGKC	7.447	8.396	8.375	8.814	8.229	8.351	9.206	8.64	8.153	8.811	7.46	7.03	7.687	8.52	10.503	9.681	7.997	8.236	8.631	7.986	8.068	8.022	8.288	9.673	8.607	8.055	8.108	8.356	9.195	8.495	7.428	7.755	8.673	9.519	8.479	8.521	9.7	7.508	10.466	9.872	9.058	8.135	9.473	8.298	9.469	8.431	9.133	7.898
214768_x_at	IGKC	5.514	6.709	6.274	6.494	6.369	6.467	7.807	7.04	6.065	6.667	5.583	4.92	6.047	6.489	8.904	7.256	5.541	6.271	6.532	6.318	6.187	5.72	6.381	7.597	6.22	6.399	6.018	6.742	6.849	5.982	5.38	5.87	6.237	7.534	6.399	6.324	7.484	5.185	8.914	8.294	6.761	5.761	7.292	6.021	7.357	6.335	6.919	6.008
214777_at	IGKC	5.864	6.43	6.74	6.833	6.55	6.016	7.747	7.153	6.287	7.228	5.734	5.46	5.825	6.698	7.999	8.112	5.929	6.282	7.009	5.634	6.048	6.031	6.797	8.597	6.265	6.325	6.264	6.66	7.369	6.783	5.412	5.679	6.598	7.556	7.368	6.571	7.84	5.725	9.614	8.192	8.236	6.254	7.301	5.604	6.949	7.275	7.367	5.939
216517_at	IGKC	2.622	3.478	3.137	3.098	3.592	3.14	4.002	3.286	2.98	3.892	2.771	2.875	3.065	3.136	3.972	3.44	2.409	2.61	3.484	3.095	2.935	2.511	2.781	3.358	2.986	2.972	2.438	3.719	3.571	2.978	3.082	2.073	3.049	3.245	3.171	3.037	4.439	2.71	5.863	3.56	3.237	3.197	3.574	2.827	4.028	2.906	2.75	2.926
237625_s_at	IGKC	3.719	4.967	4.855	5.244	4.697	5.273	5.781	5.457	4.943	5.619	4.288	2.867	5.543	6.008	5.661	6.271	5.032	5.526	6.647	5.422	3.423	3.574	4.743	5.957	5.706	5.019	4.781	5.323	4.694	5.069	2.817	4.48	5.356	5.696	5.611	3.536	5.191	3.135	6.736	4.055	5.054	3.617	3.719	4.602	4.949	4.991	3.912	4.556
1565818_s_at	IKZF1	4.732	4.626	4.718	5.302	3.801	3.88	3.997	5.508	4.626	4.17	4.047	5.213	4.757	5.569	4.04	5.392	4.163	5.194	4.896	4.468	4.183	4.092	4.364	4.761	5.103	4.783	4.109	4.543	3.854	4.305	3.87	3.996	5.063	4.734	4.954	3.843	4.752	3.962	4.861	3.553	4.788	3.924	4.451	4.662	4.199	4.712	4.004	4.076
216901_s_at	IKZF1	2.606	2.36	2.565	2.467	2.349	2.233	2.613	2.591	2.519	2.492	2.633	2.939	2.118	2.84	2.387	2.776	2.512	3.071	2.539	2.257	2.138	2.394	2.371	2.475	2.423	2.308	2.554	2.755	2.523	2.505	2.626	2.527	2.512	2.475	2.451	2.596	3.387	2.323	3.41	2.486	2.414	1.907	2.462	2.537	2.803	2.587	2.029	2.338
206890_at	IL12RB1	3.118	3.302	3.211	3.163	3.163	2.658	2.813	2.958	2.915	2.916	3.635	3.179	2.612	2.951	2.705	3.01	3.337	3.135	2.732	2.598	2.992	2.763	2.879	3.124	2.653	2.905	2.466	2.722	2.736	3.446	3.078	2.935	3.52	3.134	3.17	3.374	3.143	3.343	3.543	3.281	3.782	3.21	3.427	3.42	3.045	3.274	3.27	2.633
210904_s_at	IL13RA1	7.366	7.148	7.563	7.733	6.371	6.416	6.89	7.35	6.597	7.187	6.818	7.76	7.23	7.732	6.782	7.172	7.187	7.413	7.759	6.057	7.31	5.764	6.673	7.219	6.869	7.242	7.722	7.471	7.056	6.113	5.938	5.774	6.826	7.637	6.72	6.742	6.952	6.786	6.538	5.563	7.669	5.448	6.571	7.254	7.095	6.76	5.373	7.089
208200_at	IL1A	5.593	4.225	4.681	5.101	4.374	4.488	4.71	4.753	4.149	4.34	5.371	5.054	4.92	5.873	4.294	5.26	5.348	4.922	5.618	6.352	4.352	4.398	4.683	5.714	5.119	5.641	3.895	4.953	5.257	4.771	4.409	4.919	5.137	4.868	4.478	4.168	4.527	3.795	3.817	3.282	5.495	4.208	3.541	5.725	4.355	4.902	3.462	3.994
219971_at	IL21R	4.236	3.551	4.325	4.333	4.537	4.057	4.05	3.826	3.787	4.274	3.868	3.819	3.85	4.217	3.792	4.4	3.825	4.465	3.911	3.83	3.737	4.258	3.337	3.759	4.593	4.036	4	3.708	3.396	4.749	3.978	3.933	4.028	4.12	4.201	4.982	4.865	3.463	4.854	4.037	3.846	4.58	4.63	4.242	4.576	4.132	3.997	4.215
234377_at	IL23A	5.645	4.896	5.686	5.385	5.208	5.442	5.461	6.08	6.234	5.332	5.529	4.854	5.6	5.791	5.838	5.621	5.141	5.363	5.092	5.046	5.81	5.006	5.692	5.136	5.399	5.903	5.644	5.357	4.995	5.595	5.147	5.085	5.087	6.256	6.604	6.275	5.985	4.724	7.464	5.413	6.804	7.035	6.077	5.815	5.581	5.776	5.705	5.501
234865_at	IL23A	2.311	2.277	2.634	2.885	2.46	2.171	2.154	2.957	3.278	2.417	2.595	2.324	2.376	2.163	2.674	2.5	1.93	2.331	2.183	1.926	2.378	2.181	2.227	2.293	2.22	2.541	2.693	2.061	2.275	2.257	2.573	2.103	2.658	2.194	4.633	2.683	2.329	2.448	2.548	2.246	2.264	2.308	2.834	2.287	2.324	2.612	2.999	2.701
206341_at	IL2RA	3.786	3.85	3.829	4.525	3.911	3.594	4	4.803	3.832	3.541	3.76	3.31	4.167	4.122	3.656	4.224	3.551	4.89	4.099	3.554	3.933	3.528	3.467	4.11	4.628	3.821	3.979	3.617	3.528	4.27	3.463	3.38	4.265	4.491	3.306	3.168	3.655	3.071	3.645	3.548	3.545	3.521	3.237	3.32	3.287	4.393	3.728	3.952
211269_s_at	IL2RA	2.708	2.884	2.986	3.46	3.022	3.544	3.206	3.99	3.495	2.879	2.97	3.109	3.333	3.221	3.448	3.055	2.883	3.859	3.461	3.199	3.152	3.381	3.588	3.341	3.443	3.113	3.53	3.215	2.804	3.268	2.835	2.879	3.871	3.671	2.783	3.249	3.184	2.923	2.762	3.284	3.288	2.918	3.263	3.041	2.828	3.692	2.881	3.289
217489_s_at	IL6R	5.924	4.391	4.664	4.612	3.772	3.762	4.06	4.701	4.112	4.18	4.389	5.969	4.339	4.803	4.628	4.32	4.071	4.118	4.446	3.641	4.353	4.201	3.809	3.984	4.445	4.744	4.146	4.41	4.789	4.415	4.174	4.355	4.294	4.611	3.92	4.274	4.369	4.137	4.511	4.062	5.094	3.754	4.488	4.599	4.207	4.102	3.823	4.484
208364_at	INPP4A	4.592	4.029	4.032	5.182	3.178	3.619	3.252	5.003	4.368	3.932	3.855	4.135	4.406	5.122	3.609	4.827	3.346	4.495	4.839	2.681	3.69	3.168	3.588	4.742	4.164	4.637	4.14	4.132	3.537	3.852	3.834	3.316	4.659	4.144	4.674	3.759	4.299	3.812	4.168	3.586	4.322	4.039	3.873	3.955	4.506	4.083	3.698	3.852
1563833_at	INPP4B	1.92	1.832	2.135	2.361	2.013	2.062	1.915	2.156	2.086	1.949	2.138	2.068	1.886	2.221	1.883	2.665	1.959	2.853	2.137	2.296	1.953	1.769	2.05	1.979	2.141	1.85	2.094	2.338	2.243	2.243	1.886	2.29	1.684	2.63	4.016	1.678	2.6	1.971	3.042	1.926	2.082	1.991	1.74	2.119	1.997	3.038	1.72	1.824
205376_at	INPP4B	4.177	5.544	5.485	5.879	5.696	6.038	5.335	6.6	5.748	5.618	5.566	3.994	5.952	5.539	5.764	5.963	5.258	6.002	5.709	5.258	5.962	5.372	4.855	5.612	5.871	6.029	5.652	5.784	4.228	5.218	4.656	5.126	5.459	6.015	7.311	5.972	6.441	5.952	6.5	5.761	5.823	5.709	5.138	5.353	4.952	6.098	5.868	5.637
223878_at	INPP4B	2.193	1.832	1.964	1.919	1.893	2.033	2.304	1.819	2.057	1.866	2.397	2.291	1.922	1.883	2.039	1.731	1.999	1.986	1.959	2.096	2.163	1.747	2.037	1.748	2.017	1.934	2.035	1.9	2.045	2.162	2.135	1.965	1.905	1.916	1.856	2.088	2.081	2.14	1.784	2.037	1.695	1.991	2.126	2.165	2.082	2.143	1.944	1.969
235046_at	INPP4B	4.2	5.688	6.263	6.16	6.035	6.918	5.026	6.203	5.526	6.884	6.877	3.67	6.155	4.737	6.258	6.147	5.233	6.076	5.814	6.018	5.754	5.352	5.285	4.795	5.418	7.384	5.981	5.734	5.353	5.35	5.223	6.269	5.247	5.548	7.506	6.089	6.056	6.647	6.956	6.264	4.978	6.819	4.219	4.72	5.734	6.356	6.693	5.685
1554757_a_at	INPP5A	3.476	2.933	3.16	2.843	2.965	2.313	2.355	2.999	2.86	2.856	2.695	3.776	3.015	2.988	2.617	2.814	2.772	2.553	2.836	2.84	3.149	2.933	3.247	2.714	2.387	2.621	2.86	3.599	3.252	3.508	2.465	2.819	2.615	2.605	2.362	3.5	2.953	2.961	2.985	2.674	3.28	2.188	3.351	2.86	2.722	3.064	2.771	2.806
230362_at	INPP5F	3.46	3.167	3.061	2.374	3.38	2.85	2.845	3.018	3.166	3.041	3.76	3.171	2.705	2.941	2.721	2.946	2.627	2.585	2.738	2.847	2.913	3.416	2.632	2.913	2.935	3.26	2.916	3.341	3.173	3.242	3.256	2.956	3.414	2.613	3.442	3.86	3.208	3.659	3.191	2.97	3.942	3.202	2.961	2.644	2.731	3.292	3.206	3.306
230363_s_at	INPP5F	2.873	2.648	2.843	2.648	2.787	3.394	3.259	2.796	2.839	3.073	2.823	3.117	2.988	2.608	3.038	3.006	2.643	2.832	2.55	2.645	2.794	2.714	3.039	2.61	2.921	3.101	3.119	3.077	3.139	2.716	2.735	2.92	3.562	3.047	3.411	2.785	3.111	2.447	3.093	2.922	2.82	2.854	2.986	3.158	2.862	3.054	3.173	2.598
201625_s_at	INSIG1	4.464	5.639	5.419	5.851	5.02	3.923	4.768	6.022	4.856	5.159	5.195	5.391	5.611	5.623	4.161	5.917	4.657	5.478	5.171	4.529	5.371	4.01	5.058	5.237	5.46	5.85	4.854	5.28	5.224	5.271	4.762	4.728	5.12	4.596	5.383	4.919	5.701	4.342	5.09	4.952	5.879	4.522	5.558	5.181	5.478	5.349	4.348	4.726
224308_s_at	INTS2	4.536	4.845	5.544	5.089	5.291	6.124	4.985	5.494	5.207	5.691	5.854	3.556	4.826	4.255	5.456	5.363	4.638	5.453	5.236	5.559	4.705	5.516	5.291	4.773	4.704	5.827	5.074	4.333	5.088	4.497	4.327	5.48	4.204	5.336	6.312	5.639	5.633	5.611	5.859	5.734	4.642	6.564	4.123	4.318	5.92	5.437	5.897	5.308
1557118_a_at	INTS6-AS1	4.845	4.76	5.028	5.625	4.538	4.494	4.913	5.741	4.582	5.402	4.941	4.558	5.563	5.868	4.213	5.839	4.405	5.6	5.718	4.851	4.502	4.345	4.922	5.002	5.052	5.668	4.338	5.117	5	3.851	3.76	4.411	5.317	5.299	5.147	3.733	4.786	3.979	5.167	3.415	5.043	4.035	3.142	4.751	4.109	5.011	4.647	4.73
1570173_at	INTS7	2.478	2.497	2.407	2.646	2.445	2.651	2.771	3.049	2.576	2.764	2.447	2.316	2.543	2.357	2.666	2.808	3.132	2.134	2.422	2.855	2.389	2.358	2.461	2.115	2.59	3.43	2.557	2.117	2.868	2.788	2.232	2.758	2.325	2.962	3.245	2.033	2.63	1.975	2.507	2.537	2.101	2.721	2.21	2.64	2.928	2.393	2.653	2.641
218783_at	INTS7	3.993	3.694	4.688	4.459	4.982	4.348	4.704	4.94	4.009	4.361	4.268	3.221	3.951	3.879	4.468	4.657	3.991	4.865	4.253	4.168	3.888	4.166	4.519	3.707	3.806	4.925	4.159	3.502	4.689	3.669	3.799	4.737	4.188	4.248	5.564	4.936	4.615	4.129	4.926	4.575	4.071	5.209	3.572	4.158	4.979	4.789	4.912	4.585
211952_at	IPO5	2.693	2.521	3.598	2.87	2.99	4.088	3.176	3.063	3.193	3.524	3.125	2.745	3.08	2.961	2.969	2.558	3.157	3.334	3.135	3.021	3.273	2.855	2.735	2.878	2.72	3.102	2.591	2.752	3.191	2.902	2.446	3.577	2.847	2.561	3.948	3.548	3.406	3.383	3.483	3.075	2.748	3.859	2.631	2.806	3.665	2.919	3.299	3.456
211953_s_at	IPO5	4.576	5.627	6.271	5.825	5.697	6.468	5.478	6.151	5.843	6.129	6.196	4.057	5.777	5.5	6.487	6.169	5.54	6.381	5.891	5.703	5.721	5.603	5.663	5.296	5.677	6.717	5.751	5.315	5.773	5.235	5.08	5.974	5.505	5.81	6.384	6.029	6.104	5.987	6.532	6.127	5.115	6.372	4.886	5.212	6.532	6.238	6.012	5.749
1553757_at	IQCG	2.206	2.151	2.077	1.956	2.206	2.236	2.299	1.549	1.936	1.679	2.224	2.231	1.967	1.855	2.049	1.739	1.93	1.865	1.891	1.821	2.013	2.132	2.015	1.926	2.17	1.679	1.941	1.77	2.04	1.945	2.129	2.204	2.085	2.029	2.048	2.394	2.025	2.484	1.812	2.005	2.171	1.996	2.333	2.553	2.147	2.321	2.193	1.88
221185_s_at	IQCG	2.997	3.855	3.5	3.737	2.886	3.968	3.5	3.855	3.707	3.788	3.48	2.863	3.369	2.886	3.568	3.898	4.153	3.589	3.177	3.315	3.605	4.376	3.803	3.171	3.195	3.425	3.475	3.374	3.484	3.663	3.248	3.553	3.418	4.022	4.524	3.177	3.79	3.488	4.494	4.227	3.388	4.73	3.393	3.465	4.295	4.728	3.596	3.137
213446_s_at	IQGAP1	8.603	8.819	7.956	9.631	6.773	5.645	7.607	9.207	6.959	8.094	6.925	9.483	9.126	9.429	5.584	8.586	7.555	8.753	9.243	6.547	8.547	5.792	6.502	8.925	8.865	7.031	7.86	8.665	7.326	7.978	6.443	6.297	8.913	8.472	8.087	7.534	8.159	6.051	8.042	4.526	9.032	4.649	5.592	8.318	7.565	6.628	4.97	8.263
1555476_at	IREB2	2.123	2.284	2.652	2.652	1.931	2.944	2.712	2.537	2.467	2.212	2.406	2.442	2.265	2.11	1.964	2.745	2.128	2.07	2.22	2.494	2.409	2.838	2.466	2.133	2.233	2.274	2.222	2.581	2.125	2.081	2.04	2.478	2.136	2.564	2.084	2.992	2.774	2.54	2.199	2.126	1.85	2.512	2.296	2.428	2.268	1.994	2.11	1.843
205468_s_at	IRF5	3.138	3.378	3.409	2.938	3.034	3.065	2.598	2.836	2.862	3.424	3.76	3.579	3.182	3.281	3.27	2.409	2.753	2.882	3.335	2.742	2.952	2.828	3.448	3.363	2.972	2.647	3.045	2.962	3.049	3.593	3.185	2.859	2.611	3.376	2.86	3.374	3.05	3.56	3.418	3.038	3.633	3.388	3.808	3.582	2.723	3.566	3.138	3.555
239412_at	IRF5	7.417	4.747	7.119	4.858	6.4	6.457	5.562	7.948	6.779	6.381	6.609	7.141	6.933	5.077	6.979	7.423	4.891	7.393	6.987	7.22	6.605	7.21	7.13	5.6	7.082	6.623	5.381	4.856	6.951	6.82	8.402	5.316	6.263	7.108	6.23	6.907	7.809	7.963	7.881	8.397	7.721	7.033	7.372	7.381	8.021	6.688	7.993	4.502
229638_at	IRX3	3.031	2.865	3.078	2.888	3.077	2.861	2.674	2.341	2.839	3.077	2.867	2.907	3.839	2.724	4.093	3.102	3.312	3.783	2.925	3.247	3.255	4.219	3.007	4.081	3.372	2.818	3.063	4.307	3.586	4.415	2.953	2.914	2.96	2.775	3.036	4.895	3.183	3.648	3.083	4.677	4.363	3.094	2.793	3.276	4.34	3.288	4.977	3.655
216502_at	ISG20L2	1.952	2.349	2.226	2.342	2.532	2.135	2.075	1.94	2.46	2.235	2.505	2.474	2.399	2.283	2.445	2.463	2.182	2.254	2.001	2.813	1.988	2.261	2.266	2.35	1.855	1.958	2.471	2.206	2.072	2.488	2.441	2.271	1.966	2.356	2.398	2.477	2.422	2.151	2.126	2.551	2.546	2.017	2.273	2.254	2.492	2.177	2.356	1.983
227191_at	ITFG1	1.845	2.19	2.644	2.397	2.45	2.767	2.001	2.854	2.114	2.66	2.319	2.39	2.235	2.152	2.204	2.634	2.619	2.498	2.341	2.563	2.286	2.304	2.037	2.097	2.052	2.899	2.39	2.605	2.176	1.599	2.311	2.4	2.158	2.183	2.904	2.427	2.742	2.597	2.398	2.381	2.251	2.863	1.845	2.467	3.072	2.255	2.711	2.423
229040_at	ITGB2-AS1	5.626	7.661	5.658	8.141	7.295	7.758	7.915	7.049	6.217	6.523	5.632	7.367	7.292	6.122	6.361	6.56	6.587	6.385	7.24	6.571	6.828	7.549	6.753	7.18	7.287	6.082	7.149	7.191	6.891	4.901	7.904	6.804	6.698	5.94	6.272	6.053	6.465	7.648	6.768	6.24	6.621	7.351	6.987	6.668	5.681	5.801	7.374	6.998
205888_s_at	JAKMIP2	3.173	3.396	3.225	3.758	3.952	3.777	3.461	3.52	3.485	4.156	2.334	3.283	3.542	3.592	2.909	3.969	3.49	4.292	3.692	3.339	3.121	3.442	3.731	3.695	2.806	3.111	3.719	3.074	3.092	1.92	2.664	3.187	3.402	3.765	5.603	4.242	4.785	2.709	4.782	3.214	3.755	3.888	2.985	3.338	3.528	4.026	3.602	3.469
205889_s_at	JAKMIP2	2.623	2.378	3.325	2.967	3.195	3.418	2.817	2.592	2.707	3.014	3.035	2.295	3.246	2.434	3.115	2.934	2.728	3.032	2.645	2.472	2.326	2.756	3.033	2.452	2.568	3.142	3.225	2.408	2.342	2.802	2.729	2.514	2.384	2.941	3.682	2.861	3.409	2.196	3.373	3.431	3.184	4.936	2.989	2.898	4.109	3.197	3.056	2.388
1555787_at	JHY	3.128	3.192	3.089	2.454	2.948	2.725	2.233	3.145	2.474	2.748	3.102	2.997	2.956	3.018	2.522	2.986	2.883	2.781	2.983	2.535	2.345	2.622	2.883	2.873	3.196	2.8	2.545	2.735	2.692	3.19	3.061	2.446	2.94	2.965	3.352	3.059	3.158	2.39	3.338	2.518	3.397	2.436	2.865	3.184	2.925	3.456	2.196	2.931
220141_at	JHY	2.367	2.952	2.65	2.943	2.435	2.82	2.469	2.604	2.871	2.957	2.359	2.622	2.574	2.736	2.947	2.989	2.196	2.897	3.044	2.231	2.565	2.336	3.043	2.845	2.734	2.898	2.807	2.592	2.583	2.52	2.464	2.524	2.757	2.197	3.934	3.082	3.021	2.641	3.573	2.926	2.663	3.033	2.3	2.429	3.062	3.16	2.632	3.047
223547_at	JKAMP	4.106	4.336	4.865	4.625	4.554	5.556	4.775	4.55	4.15	5.106	5.533	3.823	4.894	3.967	4.839	4.573	5.239	4.753	4.609	4.725	4.606	4.63	4.546	3.537	4.501	5.374	5.323	4.687	4.482	4.155	4.283	5.249	3.28	4.265	5.703	5.134	4.802	5.79	4.96	5.299	4.26	5.807	4.299	4.119	5.144	5.215	5.51	4.605
241985_at	JMY	2.796	3.2	2.914	3.038	2.9	3.152	2.44	3.617	3.024	3.044	2.664	2.304	2.946	3.052	2.999	3.655	3.08	3.294	2.903	3.223	2.669	2.967	2.604	2.566	3.112	2.886	3.31	3.218	2.921	2.367	3.148	2.588	3.063	2.679	3.796	2.741	3.235	2.754	3.615	3.111	2.942	3.635	2.515	2.232	2.69	3.417	3.404	2.732
243679_at	JPH3	3.937	3.633	3.233	2.857	3.372	2.863	3.026	2.639	3.249	2.799	3.846	3.51	2.927	2.859	2.924	2.553	2.667	3.203	2.362	3.098	2.971	3.472	2.856	2.959	2.657	2.723	2.843	3.057	2.988	4.175	3.34	3.248	2.88	2.679	3.156	4	3.414	3.646	3.532	3.309	3.653	3.326	3.637	3.873	3.222	3.431	3.224	3.461
243589_at	KANSL1	8.417	7.159	7.505	7.532	6.663	6.301	7.483	7.276	6.663	6.749	6.597	7.326	7.465	7.594	6.983	6.321	7.57	6.103	7.392	7.378	7.069	7.093	7.559	6.562	6.472	7.735	7.302	7.245	7.141	7.262	6.906	7.833	7.78	7.056	6.57	6.468	6.033	6.266	5.877	6.106	7.329	6.888	7.098	7.297	6.743	6.207	5.29	7.572
214885_at	KAT8	3.933	3.884	3.983	3.736	4.12	3.941	4.06	4.097	3.5	3.695	3.718	4.714	3.549	3.754	3.977	4.307	4.116	4.005	3.717	4.081	4.367	4.245	3.596	4.11	3.723	3.653	4.204	3.771	3.967	4.16	4.845	3.711	4.112	4.466	3.618	4.051	4.166	4.408	4.326	4.33	3.462	4.139	4.427	3.683	3.731	3.221	3.836	3.97
223790_at	KATNAL1	2.315	2.171	2.633	2.901	2.538	2.681	3.099	2.619	2.764	3.241	3.009	2.582	3.019	2.647	3.578	2.782	2.718	2.747	3.021	2.12	2.901	2.762	2.597	2.404	2.769	3.262	2.552	3.262	2.618	2.646	2.463	2.714	2.878	3.038	3.46	3.082	3.024	2.684	3.328	2.799	2.989	3.646	2.79	2.703	3.152	3.217	2.995	2.763
227713_at	KATNAL1	3.844	4.276	4.741	4.582	4.541	4.913	4.295	4.511	4.374	4.696	5.177	3.732	4.458	3.678	4.701	4.611	4.668	5.355	4.045	3.705	4.306	4.832	4.481	4.412	4.378	4.154	4.706	4.344	4.361	4.657	4.497	4.087	3.731	4.595	5.028	4.725	5.038	3.786	5.557	5.114	4.177	5.787	4.548	4.82	5.225	5.359	5.021	3.921
203163_at	KATNB1	5.001	4.526	4.583	4.143	4.049	4.076	4.257	4.726	4.466	4.569	4.323	4.627	4.07	4.412	4.569	4.657	4.409	5.298	4.677	4.163	4.531	4.109	4.39	4.774	4.249	4.163	4.729	4.078	5.001	5.024	5.706	4.074	4.55	4.402	3.681	4.922	5.074	4.549	5.15	5.028	5.059	4.929	4.925	4.602	4.979	4.339	4.439	4.163
207237_at	KCNA3	6.13	6.828	6.68	7.276	5.425	5.049	5.306	7.183	5.54	7.044	6.383	6.04	6.311	7.862	5.404	7.464	5.401	7.197	7.185	5.62	6.105	6.513	5.486	7.191	6.592	7.147	5.941	6.68	5.409	6.117	3.298	4.605	7.031	6.257	6.771	5.785	6.479	3.296	6.583	3.768	7.142	3.871	3.782	5.875	6.434	6.234	3.896	5.828
1552742_at	KCNH8	2.061	1.99	2.787	2.771	2.207	3.616	2.173	3.369	2.417	3.213	2.346	1.621	2.565	2.47	2.215	2.32	2.327	2.303	2.658	2.638	2.222	2.371	2.727	2.345	1.951	3.052	2.522	2.82	2.139	2.014	1.806	2.494	2.796	3.109	2.042	2.128	1.891	2.089	2.218	1.704	1.654	2.407	1.953	2.048	1.956	2.399	1.873	2.946
200922_at	KDELR1	4.751	4.708	4.825	4.731	4.24	3.592	4.565	4.82	3.984	4.479	4.644	4.029	4.535	4.826	4.564	4.498	4.063	5.332	4.719	3.972	4.306	4.118	4.031	4.174	4.074	4.465	4.914	4.823	4.308	4.72	5.056	3.331	4.5	3.976	4.196	4.595	4.995	4.172	5.346	4.6	4.83	4.399	4.538	4.835	5.155	4.354	4.507	4.219
201547_at	KDM5B	1.971	2.13	2.128	1.764	1.815	2.162	1.963	1.777	2.052	1.751	2.011	2.21	1.925	1.974	1.958	1.775	1.642	1.673	2.055	2.11	2.127	2.573	1.738	1.863	1.906	2.048	1.783	2.278	2.311	2.456	1.694	1.864	2.07	1.846	1.787	1.777	1.858	2.169	1.918	1.966	2.211	1.769	2.168	1.87	2.201	1.99	1.775	2.194
206700_s_at	KDM5D	7.01	2.429	7.352	2.549	2.272	2.519	3.066	2.2	2.189	7.916	6.744	6.973	7.899	8.024	8.438	8.075	7.649	8.221	2.827	7.873	7.487	8.231	8.144	7.865	7.825	7.154	7.833	7.807	7.686	6.95	7.782	7.653	7.966	7.762	8.075	7.681	8.535	2.501	8.646	3.07	7.757	8.239	7.649	7.855	7.648	8.164	8.324	2.477
241024_at	KHDC1	1.99	2.182	2.049	2.123	1.979	2.263	2.607	2.157	2.199	2.218	2.401	2.215	1.708	2.089	1.783	2.08	1.706	2.218	2.079	2.069	2.25	2.129	2.086	2.19	1.974	2.068	2.062	1.987	2.214	2.228	2.446	2.184	2.121	2.17	2.506	2.427	2.316	2.118	2.266	2.218	2.374	2.353	2.175	2.142	2.184	2.089	2.4	2.129
201728_s_at	KIAA0100	4.22	3.845	3.948	4.803	3.53	2.991	3.732	4.731	3.481	3.477	4.213	4.761	4.14	4.855	3.564	4.324	3.588	4.086	4.643	3.544	4.129	3.833	3.545	4.606	4.128	3.977	3.699	4.29	3.598	4.27	3.733	3.516	4.901	4.409	3.627	3.753	3.587	3.458	3.509	3.278	4.085	3.239	4.08	4.171	4.297	3.113	3.6	3.802
1554440_at	KIAA0513	2.267	2.275	2.498	2.37	2.177	1.973	2.32	1.942	1.827	2.064	2.318	1.904	2.548	2.421	2.056	2.539	2.396	2.521	2.173	2.31	2.365	2.207	2.243	2.581	2.646	2.029	2.408	1.794	2.27	2.228	2.76	3.146	2.454	2.214	2.197	2.106	2.465	2.206	2.432	2.473	2.155	2.353	2.583	2.564	2.129	2.458	2.519	2.721
233915_at	KIAA0825	3.275	3.063	3	3.631	2.932	3.187	3.808	2.826	2.304	2.881	2.508	3.307	2.948	2.795	3.094	2.899	3.007	2.558	2.621	2.589	2.842	2.795	2.355	3.114	2.808	2.727	2.61	2.496	2.564	3.161	2.918	3.094	2.88	2.5	2.439	2.744	2.518	2.752	2.625	2.559	2.731	2.426	2.808	2.476	2.577	2.516	2.262	2.757
228067_at	KIAA1211L	5.807	4.896	4.27	4.828	3.832	3.665	5.484	4.389	5.11	4.503	4.604	4.478	5.066	3.889	4.851	4.262	4.556	4.456	5.112	5.483	4.481	4.472	4.935	4.517	4.157	4.187	5.2	4.482	5.156	3.638	5.921	5.079	4.444	4.477	3.77	4.252	3.311	4.369	3.411	3.518	3.487	4.463	4.974	4.562	4.447	4.042	4.019	3.619
221874_at	KIAA1324	7.594	5.929	5.742	5.853	5.706	6.177	4.981	4.86	5.854	5.725	4.872	5.348	6.086	5.52	6.34	4.28	6.52	3.477	4.148	5.926	6.134	5.559	6.124	4.714	5.48	6.218	6.081	4.989	6.833	4.711	6.342	6.602	4.692	5.238	5.27	5.211	4.613	4.95	4.815	4.835	4.041	4.377	6.543	6.351	4.775	4.13	4.757	4.445
226248_s_at	KIAA1324	9.967	8.427	7.798	7.813	8.092	7.595	6.768	6.739	7.786	7.717	6.603	7.921	7.955	7.885	8.482	6.387	9.074	5.565	6.029	8.11	8.866	7.766	8.052	6.515	7.852	8.082	8.572	7.583	9.324	6.922	8.621	8.284	7.061	7.416	7.082	7.731	7.167	6.97	7.488	6.926	6.352	6.1	9.169	8.922	6.961	5.702	6.922	6.432
243349_at	KIAA1324	4.744	4.043	3.604	3.965	3.895	3.322	3.023	3.884	3.702	3.775	3.644	4.052	3.625	3.71	4.503	3.124	4.387	3.211	3.604	3.613	4.331	3.827	3.991	3.375	4.133	4.618	3.948	3.608	4.383	3.445	4.368	4.04	3.993	3.781	3.192	3.247	3.518	4.031	3.728	3.346	3.306	3.215	4.72	4.331	3.752	3.739	3.524	3.75
235021_at	KIAA2026	3.202	3.025	3.351	3.705	3.293	3.192	3.202	3.85	3.333	3.739	3.128	2.843	3.761	3.876	2.954	3.789	3.279	3.441	3.925	3.24	3.852	2.971	2.856	3.455	3.742	3.488	3.189	3.59	2.975	2.875	2.424	3.427	3.446	3.879	3.596	2.748	3.143	2.518	3.061	2.559	2.945	2.481	2.473	3.16	3.013	3.159	2.757	3.319
236306_at	KIAA2026	2.356	2.485	2.972	2.385	2.413	2.032	2.132	2.502	2.502	2.616	2.523	2.276	2.425	2.549	2.851	2.318	2.608	2.416	2.339	2.187	2.425	2.376	2.362	2.297	2.363	1.572	2.424	2.158	2.409	2.735	2.556	2.555	2.617	2.648	2.391	2.415	2.211	2.689	2.597	2.402	2.612	2.222	2.926	2.707	2.493	3.001	2.553	2.549
214932_at	KIDINS220	1.953	1.738	2.018	1.71	1.748	1.653	1.856	1.555	1.788	1.841	2.038	2.157	1.702	1.72	1.768	1.752	1.84	1.998	2.004	1.484	1.86	1.793	1.887	1.726	1.693	2.023	1.772	2.051	1.735	2.061	1.763	1.979	1.75	2.098	1.938	1.846	1.752	1.822	1.904	1.742	1.893	1.633	2.122	2.196	1.725	1.906	2.012	1.81
204444_at	KIF11	2.192	2.577	2.578	2.317	2.695	2.984	3.135	2.356	2.21	2.448	2.28	2.019	2.15	2.288	3.782	3.27	2.276	2.358	2.536	2.195	2.486	2.505	2.484	2.394	2.029	2.525	2.28	1.968	2.445	2.042	2.203	2.489	1.935	2.903	5.083	2.936	3.315	2.839	4.06	3.726	2.654	3.94	2.871	2.966	3.287	3.412	3.447	2.442
222039_at	KIF18B	3.565	3.505	3.693	3.378	3.455	3.519	3.925	3.349	3.77	3.965	3.756	4.05	3.236	3.628	4.084	4.201	3.758	3.364	3.604	4.349	3.704	3.452	4.222	4.084	3.721	3.734	3.533	3.817	3.877	3.447	3.762	3.877	4.1	3.886	4.516	4.208	4.484	3.629	3.999	4.308	4.179	3.896	4.048	4.273	3.925	4.522	4.062	4.216
203086_at	KIF2A	4.056	4.625	5.207	4.952	4.864	5.536	4.683	4.768	4.745	5.463	5.26	4.179	4.501	4.646	4.943	4.924	4.548	5.801	5.1	4.438	5.284	4.636	4.709	3.806	4.796	4.837	4.999	4.864	4.803	4.332	3.88	5.032	3.838	4.577	5.956	4.936	5.518	5.177	5.736	5.056	4.685	5.568	4.291	4.726	5.181	5.177	5.501	4.818
213623_at	KIF3A	3.084	3.628	3.571	3.661	3.418	3.852	3.412	3.848	2.923	2.855	3.488	3.027	3.735	3.455	2.638	3.951	3.438	4.212	3.32	2.861	2.971	3.334	3.141	3.511	3.127	3.77	3.477	3.611	3.065	3.312	2.724	3.24	3.783	4.216	4.465	3.479	4.277	3.134	3.8	2.678	3.07	4	3.563	3.222	2.926	3.95	3.255	2.617
228680_at	KIF3A	3.444	3.628	4.38	4.171	4.644	5.169	4.338	4.436	3.976	4.918	5.063	2.652	4.227	3.731	4.152	4.068	3.848	4.207	4.108	4.105	3.674	4.42	4.132	3.381	3.278	4.95	4.228	3.568	4.116	3.902	3.864	4.454	4.065	4.127	5.419	4.414	4.838	4.297	5.09	4.591	3.538	5.871	3.815	3.355	4.672	4.532	4.803	3.805
208179_x_at	KIR2DL3	3.44	3.352	4.051	3.384	3.537	3.235	3.194	3.417	3.594	4.546	4.125	4.049	3.367	3.624	3.417	4.179	3.567	4.855	3.357	3.774	3.382	4.063	3.503	4.179	3.454	3.371	3.634	3.891	3.589	3.632	3.862	3.964	4.025	3.994	3.843	3.964	5.529	3.652	4.535	3.779	3.788	4.174	4.008	4.109	4.772	4.058	3.824	4.038
242517_at	KISS1R	4.201	5.501	5.435	5.155	6.181	5.305	5.903	5.488	4.28	5.014	4.861	5.239	5.522	5.1	5.332	5.471	5.62	4.643	5.628	4.908	5.134	5.58	4.922	4.744	4.948	5.225	5.29	6.026	6.175	5.009	5.982	5.459	6.105	4.246	3.318	5.238	4.613	5.124	4.745	4.37	4.128	5.259	4.588	4.008	5.028	4.72	4.658	5.926
205051_s_at	KIT	4.386	4.163	4.663	3.702	4.264	4.082	3.54	4.143	3.717	4.037	4.986	3.63	3.973	3.751	4.506	3.487	5.743	4.212	4.383	4.535	4.488	3.847	4.8	3.641	3.807	4.224	4.647	4.444	4.842	4.149	3.579	4.54	3.498	4.195	3.071	4.008	3.855	3.672	2.727	4.124	3.599	4.462	4.008	3.551	4.343	3.744	4.123	3.617
206965_at	KLF12	5.881	5.68	6.253	6.677	5.973	6.194	5.992	6.905	6.528	6.006	5.523	5.385	6.599	6.163	5.702	6.275	5.974	6.235	5.725	6.796	5.294	6.159	6.117	5.774	6.735	6.38	6.257	6.121	5.304	6.163	5.206	5.545	6.254	6.211	6.056	5.513	5.867	4.172	5.864	5.432	6.229	5.826	5.302	5.748	5.76	5.931	5.328	6.223
208467_at	KLF12	2.902	3.38	2.852	2.856	2.625	2.414	2.666	3.05	2.852	2.914	3.127	2.846	2.868	3.102	2.8	3.159	2.542	3.438	2.74	2.634	2.797	2.886	2.66	2.673	2.621	3.004	2.54	2.682	2.694	2.99	2.724	2.243	3.462	2.764	2.816	3.633	3.593	3.009	2.984	2.417	3.316	2.688	2.836	2.958	2.853	3.418	2.619	2.624
229881_at	KLF12	5.017	5.735	5.492	5.911	4.98	5.815	4.811	5.752	5.444	6.365	5.621	4.662	5.186	7.088	5.379	6.82	5.437	6.224	5.69	5.562	5.649	5.345	4.955	5.391	6.078	5.98	4.736	5.834	4.883	5.493	4.16	4.911	5.192	5.785	6.499	5.813	6.036	4.13	5.886	4.551	5.757	5.272	4.222	5.674	5.662	5.803	4.005	5.613
238940_at	KLF12	3.185	3.131	3.406	3.792	3.054	3.003	2.642	3.953	2.77	3.603	3.344	3.157	3.48	4.199	2.766	4.393	3.314	4.416	3.732	3.236	3.148	3.058	2.666	3.258	4.007	3.396	2.847	3.392	3.01	3.427	2.781	3.119	3.255	3.376	4.972	3.645	4.214	2.679	4.311	2.974	3.821	3.229	2.729	3.692	3.358	3.931	2.93	3.502
239019_at	KLF12	2.705	2.842	3.008	3.445	2.688	2.433	2.519	3.244	2.709	3.54	2.727	2.818	2.666	3.579	2.923	3.479	2.881	3.353	3.224	2.427	2.567	2.618	2.498	2.728	2.683	3.022	2.767	2.893	2.617	2.628	2.725	2.651	2.964	2.791	3.748	2.69	3.117	2.618	3.474	3.049	3.139	2.684	2.632	2.713	2.763	3.174	2.537	3.383
1552733_at	KLHDC1	3.36	3.549	4.861	3.872	3.614	4.813	3.482	3.986	4.21	4.873	4.769	3.46	3.695	3.768	4.043	4.263	3.81	4.381	4.229	3.938	3.703	4.476	3.877	3.521	3.679	4.785	4.339	4.072	3.972	3.798	3.347	3.987	3.763	3.883	4.631	4.313	4.385	4.248	4.933	4.221	3.552	5.273	3.355	3.049	4.659	4.655	5.189	3.981
1564272_a_at	KLHDC1	1.519	1.671	1.442	1.75	1.658	1.561	1.694	1.699	1.664	2.136	1.525	1.605	1.334	1.422	1.511	1.59	1.955	1.535	1.468	1.629	1.568	1.626	1.609	1.602	1.438	1.721	1.575	1.781	1.688	1.525	1.451	1.539	1.935	1.864	1.758	1.561	1.751	1.517	1.701	1.583	1.457	1.632	1.431	1.59	1.722	1.6	1.574	1.537
236285_at	KLHDC7B	4.711	4.598	4.739	4.541	4.862	4.532	4.925	4.719	4.991	4.569	4.562	4.726	4.599	4.76	4.544	4.405	4.256	5.32	4.765	5.434	4.647	5.379	4.968	5.026	4.423	4.45	4.793	4.962	4.975	5.035	5.661	5.498	5.041	6.198	5.263	5.213	5.344	5.471	5.757	5.128	5.097	5.316	5.225	4.967	5.739	3.891	5.985	4.422
221837_at	KLHL22	2.557	2.63	2.895	2.957	2.612	2.147	2.326	2.562	2.638	2.263	2.871	2.951	2.58	2.692	3.054	2.505	2.627	2.489	3.064	2.345	2.546	2.732	2.461	2.704	2.436	2.354	2.451	2.802	2.695	2.92	2.541	2.344	2.839	2.761	2.59	2.715	2.985	2.657	2.771	2.546	3.521	2.745	2.914	2.821	2.402	3.193	2.457	2.496
220238_s_at	KLHL7	2.767	3.37	2.777	2.995	2.823	3.32	3.224	2.982	3.096	3.262	3.267	2.583	2.659	2.869	3.241	3.504	2.757	3.31	2.933	2.209	3.026	2.814	3.216	2.608	3.074	3.949	2.86	2.676	3.163	2.782	2.805	2.765	3	3.073	3.759	2.655	2.652	2.929	3.075	3.205	2.591	3.294	3.264	2.515	3.306	3.216	2.831	2.395
220239_at	KLHL7	4.134	4.728	4.375	4.677	4.048	5.239	5.068	4.669	3.538	4.728	5.502	3.61	4.49	3.815	4.562	4.918	4.326	4.499	4.067	4.119	3.816	4.867	4.203	3.908	5.054	5.609	4.566	4.186	4.722	4.141	4.528	4.28	3.769	4.564	5.479	4.92	4.205	5.147	4.752	5.785	4.798	5.203	5.177	4.501	5.282	4.8	5.132	3.393
1561206_at	KLHL8	4.639	4.682	4.951	4.766	4.271	4.29	4.826	5.389	4.195	4.157	4.006	4.187	4.891	4.247	4.876	4.414	5.508	4.145	4.899	4.489	3.801	4.145	4.709	4.246	4.926	5.408	4.313	4.639	5.134	4.336	4.5	4.599	4.52	4.473	4.233	3.775	3.969	3.01	3.587	3.823	3.965	4.409	4.242	4.023	4.377	3.839	4.031	4.543
210690_at	KLRC4	1.971	2.215	2.633	4.04	3.017	3.012	2.45	3.255	2.628	3.662	3	2.452	2.703	3.245	2.442	4.305	3.173	4.344	3.16	2.602	2.912	2.524	2.55	2.774	2.846	3.479	2.406	2.346	2.434	2.329	2.097	2.474	3.489	3.218	5.247	2.231	4.564	2.206	4.302	2.659	3.597	3.77	2.329	4.143	4.525	3.712	3.465	3.399
206241_at	KPNA5	2.044	2.317	2.353	2.521	2.337	2.88	1.942	2.317	2.499	2.842	2.679	2.68	2.28	2.447	2.162	3.102	2.421	2.987	2.781	2.708	2.069	2.555	1.855	2.291	2.484	2.636	1.867	2.338	2.202	2.066	2.045	1.901	2.59	2.972	2.991	2.164	3.007	2.309	2.755	2.559	2.414	2.749	2.128	2.331	2.181	2.399	2.11	2.376
229317_at	KPNA5	3.695	4.565	5.084	4.969	4.711	6.343	3.802	5.121	4.655	6.288	6.312	2.907	4.914	4.523	4.564	5.572	4.83	5.625	5.445	4.421	4.923	4.816	4.889	3.36	4.657	5.982	5.298	4.283	4.099	4.117	3.686	5.135	3.105	4.772	6.648	4.961	5.518	5.577	6.351	5.41	3.535	6.638	3.637	4.272	5.374	6.163	5.97	4.679
1559203_s_at	KRAS	1.958	1.987	2.294	2.006	1.806	2.568	2.365	2.228	2.154	2.343	2.211	2.157	1.998	1.997	1.985	2.104	1.844	2.196	2.49	2.262	1.991	1.935	2.107	1.883	2.012	2.681	1.942	2.256	1.98	2.041	2.128	2.069	1.807	2.22	3.02	2.123	2.045	2.358	2.403	2.516	1.944	2.579	1.912	1.857	2.152	2.297	2.669	2.182
204010_s_at	KRAS	1.914	2.07	1.979	2.162	2.219	2.822	2.324	2.106	2.178	2.036	2.435	1.711	2.02	1.981	2.162	1.752	2.675	1.851	2.259	1.902	1.861	1.996	2.358	1.867	2.458	2.185	1.923	2.389	2.515	1.979	2.319	2.106	2.103	2.284	1.913	1.999	1.901	2.024	1.979	2.136	1.916	2.176	2.137	2.034	1.612	2.612	2.175	2.282
214352_s_at	KRAS	7.978	7.549	7.548	8.534	7.081	6.411	7.28	8.202	6.62	7.645	7.566	8.122	8.316	8.4	5.879	8.23	6.993	8.106	8.251	6.648	7.824	6.215	6.385	7.955	8.215	7.453	6.797	7.61	6.836	7.597	5.993	6.304	7.843	7.885	8.388	7.249	7.821	5.697	7.997	5.137	7.986	5.623	4.661	7.893	7.371	7.185	5.431	7.558
218303_x_at	KRCC1	6.428	6.484	6.89	6.798	6.404	8.23	6.43	6.827	6.511	8.112	8.235	6.177	7.182	6.291	7.109	6.884	7.154	7.246	7.408	6.759	7.626	6.954	6.755	5.74	6.785	8.07	7.235	6.894	6.635	6.545	6.384	7.499	6.058	6.948	8.267	7.103	7.622	7.795	7.937	7.215	6.423	8.251	5.651	6.519	7.24	7.796	7.635	6.623
222585_x_at	KRCC1	5.458	6.231	5.799	6.698	5.195	6.693	5.717	6.739	5.672	7.121	6.797	6.357	6.888	6.828	5.644	6.68	6.255	7.031	7.134	5.868	7.334	5.505	5.33	6.522	6.819	6.537	6.145	6.704	5.69	5.664	5.119	5.58	6.386	6.633	7.102	5.52	6.851	5.636	6.79	5.535	6.541	5.567	4.919	6.417	5.648	6.617	6.168	5.682
233329_s_at	KRCC1	5.548	5.525	5.893	5.894	5.096	7.32	5.463	5.82	5.473	6.931	7.016	5.219	6.213	5.171	6.034	5.908	6.007	6.219	6.482	5.532	6.698	5.53	5.369	4.884	5.533	6.977	6.199	5.893	5.723	5.188	5.337	6.22	5.478	6.069	7.137	5.746	6.344	6.382	7.017	6.172	5.364	6.954	4.556	5.683	5.711	6.455	6.316	5.671
216713_at	KRIT1	4.592	5.033	5.718	5.197	5.119	5.61	5.227	5.519	5.141	5.632	4.59	2.853	4.937	4.873	5.328	5.382	4.737	5.157	5.372	4.958	4.767	4.92	5.021	4.664	4.572	5.255	4.895	4.966	5.371	3.951	4.575	5.333	4.954	5.499	5.93	4.899	5.514	5.39	5.608	4.834	4.301	5.897	3.659	4.176	5.465	4.93	5.347	4.927
229785_at	KRIT1	2.954	3.129	3.951	3.775	3.405	4.438	3.131	3.793	2.904	4	3.814	2.789	3.193	3.155	2.95	3.644	3.653	4.021	3.805	3.769	3.079	3.673	3.228	3.06	3.27	4.343	3.605	3.655	3.179	2.8	3.092	4.017	2.856	3.198	4.648	3.986	3.954	4.321	4.172	3.324	2.732	4.69	2.675	3.08	3.816	3.653	4.196	3.097
213680_at	KRT6B	2.367	2.046	2.103	2.083	2.623	1.862	2.65	2.499	2.104	2.192	1.819	2.03	2.055	2.332	2.149	2.047	2.115	2.252	2.206	2.745	2.478	2.375	2.247	2.724	2.645	2.181	2.236	2.211	2.234	2.337	2.446	2.382	2.42	2.404	2.511	2.587	2.18	2.34	2.247	2.199	2.06	2.091	2.632	2.541	2.271	2.036	2.338	2.261
1552485_at	LACTB	4.257	4.254	4.214	5.306	3.799	4.708	3.862	5.247	3.596	4.072	4.852	4.002	4.594	4.13	3.737	4.227	4.026	4.459	5.216	3.698	3.933	3.832	3.805	4.154	4.191	4.754	4.695	3.902	4.14	4.436	4.5	4.088	4.013	4.156	4.349	4.354	4.312	5.539	4.497	4.843	4.261	4.557	4.364	3.728	4.308	4.407	3.982	3.991
1552486_s_at	LACTB	4.994	5.502	5.809	6.128	4.63	5.458	5.221	6.306	5.209	5.375	5.507	4.986	5.402	5.249	5.824	5.666	5.551	5.527	6.05	4.589	5.264	4.825	5.415	5.221	5.469	5.733	6.011	5.053	5.708	4.925	4.765	5.285	5.138	5.985	6.104	5.817	5.71	6.349	6.227	5.405	5.152	5.173	5.14	5.264	5.469	5.406	5.235	5.388
212193_s_at	LARP1	4.463	4.851	4.491	4.501	4.897	4.362	5.041	4.307	4.349	4.74	3.748	4.508	4.29	4.205	4.256	4.401	4.665	4.627	4.056	4.479	4.793	4.281	4.611	4.854	4.216	4.324	4.807	4.808	5.222	4.42	5.976	4.544	3.929	4.14	3.969	4.852	6.055	5.29	5.865	5.291	4.349	5.047	5.085	4.683	4.673	4.294	4.947	4.132
1555384_a_at	LARP4	2.854	3.487	2.961	3.249	2.792	2.991	2.655	3.176	2.751	2.945	3.417	3.622	2.964	3.5	2.888	3.054	2.756	3.784	3.007	3.063	2.85	2.453	2.886	3.271	3.634	2.887	3.027	2.876	2.668	3.248	2.978	2.834	3.473	3.361	3.23	3.038	3.373	2.999	3.701	2.88	3.479	2.912	2.989	3.225	3.073	3.767	2.718	2.646
214155_s_at	LARP4	1.979	2.193	2.676	2.228	2.337	2.774	2.177	2.619	2.101	2.734	2.349	2.29	2.269	2.147	3.199	2.797	2.269	2.521	2.308	1.911	2.069	2.158	2.368	1.955	2.363	3.162	2.216	1.917	2.533	1.936	1.753	2.726	2.165	2.473	3.454	2.635	2.914	2.976	3.383	2.76	2.298	2.946	2.019	2.04	2.851	2.541	2.547	2.633
238959_at	LARP4	2.957	3.043	2.796	3.003	2.666	2.635	2.807	3.177	2.749	2.94	2.989	2.952	2.706	3.779	2.656	3.346	2.837	3.423	2.973	2.782	2.767	2.587	2.69	3.093	3.088	2.782	2.811	2.915	2.572	3.256	2.772	2.405	2.992	2.89	3.214	2.815	3.501	2.832	3.445	2.543	3.077	2.581	2.649	3.268	2.806	3.404	2.621	2.631
232293_at	LCORL	3.906	4.221	3.921	3.957	4.306	4.877	4.14	4.328	3.94	5.082	4.699	3.23	4.361	3.221	3.972	4.444	4.458	4.612	4.427	3.431	4.073	4.154	4.033	3.638	4.336	4.42	4.647	4.045	3.78	3.868	4.158	4.723	3.734	3.97	5.085	4.41	4.742	4.82	4.561	4.9	4.056	5.152	3.738	4.252	4.311	4.597	4.827	3.667
235970_at	LCORL	2.754	3.662	3.936	3.863	3.401	4.806	3.151	3.679	3.729	4.335	4.348	2.633	3.794	3.5	3.368	4.127	4.161	3.929	4.331	3.649	3.667	3.336	3.598	2.816	3.961	4.556	3.725	3.511	3.488	3.29	3.54	3.654	3.487	3.663	5.041	3.301	4.393	4.148	4.255	3.819	3.324	4.65	2.601	3.267	3.55	3.847	3.733	3.963
240592_at	LCORL	5.177	5.925	5.958	6.348	5.913	7.112	5.649	6.277	5.523	7.22	7.24	4.63	6.441	5.576	5.953	6.425	6.105	6.591	6.709	5.931	6.342	6.348	6.049	5.268	5.848	7.233	6.487	5.554	6.054	5.963	5.926	6.775	5.569	5.876	7.369	6.11	6.427	6.81	6.867	6.546	5.35	7.335	4.883	5.349	6.643	6.5	6.769	5.979
244578_at	LCP2	3.757	3.679	3.524	4.377	3.737	3.734	3.716	4.271	4.105	3.861	3.649	3.775	3.955	4.745	3.146	4.559	3.37	5.154	4.462	3.365	3.341	3.498	3.113	4.052	4.142	3.552	3.731	3.591	3.839	3.662	4.074	4.33	3.697	4.396	4.72	3.835	4.128	4.159	3.726	3.167	4.331	4.418	3.59	4.278	3.757	3.922	3.461	3.311
202067_s_at	LDLR	3.589	3.762	3.778	3.754	3.495	2.737	3.364	3.456	3.993	3.258	3.573	4.321	3.479	3.452	3.211	3.626	3.236	3.899	3.679	3.417	3.551	3.208	2.79	3.477	3.441	3.239	3.125	3.122	3.565	4.273	3.663	3.097	3.595	3.247	3.179	4.022	4.146	3.532	4.031	3.127	3.944	3.14	3.256	3.584	3.814	3.387	3.439	3.203
217005_at	LDLR	2.996	2.577	2.736	2.506	2.626	2.778	3.009	2.359	2.761	2.241	2.829	3.972	2.831	2.778	2.845	2.512	2.748	2.85	2.467	2.971	2.515	2.602	2.816	3.081	2.776	2.957	2.538	2.876	2.713	3.185	2.881	3.061	2.565	2.759	2.416	2.84	2.946	2.72	2.621	2.923	3.085	2.766	3.024	2.894	2.788	2.578	3.088	3.085
217103_at	LDLR	2.052	1.996	2.081	2.098	2.082	2.116	1.893	2.158	1.864	1.789	2.138	2.333	1.902	1.968	2.092	2.081	1.93	2.041	2.164	2.082	2.102	2.181	2.147	2.332	2.04	1.85	2.026	1.801	2.107	2.475	2.531	2.41	2.369	2.328	1.941	2.117	2.364	2.292	1.972	2.114	2.377	2.127	2.136	2.031	2.015	1.82	2.01	2.329
243362_s_at	LEF1-AS1	4.006	5.008	4.191	4.401	4.557	6.135	3.912	4.523	5.889	4.667	3.983	3.401	4.455	4.715	4.671	4.531	3.999	3.895	3.893	4.349	4.279	4.461	4.242	4.208	4.008	5.097	4.108	5.222	4.05	3.997	4.63	4.436	4.92	4.205	1.96	4.29	4.036	4.369	2.694	4.343	3.334	4.852	4.259	4.202	2.716	4.272	4.871	4.627
1552546_a_at	LETM2	3.115	2.52	2.585	2.75	3.24	2.414	3.812	2.611	3.051	3.061	2.208	3.395	3.05	2.601	2.88	2.479	2.24	2.645	3.02	2.372	2.571	2.615	3.045	2.99	2.678	2.416	2.94	3.124	3.424	2.742	3.079	2.827	2.511	2.516	1.969	2.926	2.356	2.409	2.453	2.274	2.33	2.286	2.698	2.513	1.853	2.14	2.513	2.579
223828_s_at	LGALS12	4.597	5.78	5.783	4.831	5.874	5.803	6.08	5.392	5.347	5.093	6.055	5.762	5.083	5.417	5.605	4.859	5.411	5.122	5.421	6.22	5.465	5.908	5.831	5.907	5.426	5.039	5.787	5.633	6.048	5.762	5.554	5.529	4.911	6.23	4.72	5.874	5.237	4.72	4.755	5.506	5.379	4.472	6.341	5.376	5.558	5.236	5.208	4.954
227819_at	LGR6	5.451	5.095	6.41	5.794	5.823	4.977	5.302	4.981	5.354	5.534	5.321	5.101	5.983	5.568	5.105	5.69	5.657	6.226	5.321	5.828	5.793	6.146	5.342	5.267	4.839	5.377	5.644	4.632	5.138	5.096	5.205	5.9	5.764	5.761	6.922	6.359	6.319	4.617	5.825	5.897	6.286	6.368	6.08	5.034	5.955	5.41	5.643	5.628
207872_s_at	LILRA1	4.35	4.439	4.249	4.822	3.573	3.859	4.389	4.1	3.66	4.113	4.384	5.03	4.891	3.883	3.98	4.413	4.264	4.131	4.357	4.399	4.338	4.217	4.462	4.293	4.285	3.96	4.79	4.562	5.407	4.275	5.112	4.603	3.998	3.864	3.716	3.511	4.404	3.878	4.003	4.226	4.444	3.26	4.463	4.38	3.837	3.483	3.275	4.638
222456_s_at	LIMA1	1.843	2.183	2.009	1.841	2.032	2	1.855	2.117	1.993	2.116	2.086	2.174	1.898	1.992	1.782	2.226	1.744	1.825	1.775	2.412	2.038	2.181	1.676	1.84	1.99	1.845	1.887	2.316	1.679	1.769	2.003	2.405	2.248	2.285	2.204	1.693	2.027	1.926	1.784	1.999	2.261	1.835	1.738	1.998	1.773	2.095	2.048	2.187
1570259_at	LIMS1	5.219	5.178	5.674	5.874	4.869	5.561	5.715	6.531	4.932	5.013	5.468	3.806	5.702	5.276	5.292	5.496	4.725	5.04	5.731	5.01	4.114	5.266	5.665	4.918	5.529	6.056	4.921	5.013	4.955	4.903	4.727	4.361	5.62	5.04	4.88	5.157	4.915	4.128	5.205	4.94	5.142	4.847	4.934	4.168	5.218	4.881	4.977	4.485
1563369_at	LINC00173	4.657	4.602	4.226	4.269	3.389	3.925	4.613	3.587	4.513	4.952	4.186	4.154	4.97	4.244	4.152	3.751	4.958	3.667	4.589	4.519	3.885	3.86	4.057	5.204	5.091	4.252	5.067	5.187	5.497	4.017	5.323	4.164	4.086	4.471	3.762	3.721	3.556	4.01	3.78	3.943	4.36	3.921	4.709	4.403	3.146	3.72	4.142	4.767
1559957_a_at	LINC00205	4.519	4.602	4.046	4.514	4.372	4.264	4.769	5.087	4.712	4.343	4.305	3.702	5.146	4.875	4.244	4.235	3.77	4.585	4.415	4.592	4.097	4.104	4.202	4.463	4.167	4.946	4.105	4.406	4.101	4.429	5.139	4.28	5.381	4.248	3.652	3.868	3.792	3.312	3.716	4.312	4.204	4.244	4.034	4.025	3.861	4.416	3.69	4.182
228908_s_at	LINC00205	3.734	4.093	3.901	3.644	4.144	4.959	4.24	4.359	3.966	4.316	4.409	2.596	4.198	3.758	4.722	3.868	4.143	4.535	4.041	4.187	3.507	4.841	4.56	3.829	3.605	4.521	3.934	4.591	3.263	3.43	3.989	4.71	3.789	4.055	4.228	4.568	4.022	4.185	4.239	4.467	3.639	4.616	3.445	3.964	3.657	4.764	4.626	4.053
228909_at	LINC00205	3.551	3.6	3.48	3.519	3.846	4.544	3.548	4.148	4.279	4.82	4.335	2.962	4.339	3.46	4.133	3.441	3.671	4.319	3.38	3.82	3.644	3.885	4.166	3.552	3.47	4.403	3.731	4.007	3.617	3.085	4.278	4.213	4.142	3.089	3.796	4.346	3.915	3.667	3.754	4.036	2.965	4.754	3.344	3.932	3.514	4.757	4.499	3.823
231455_at	LINC00487	2.118	2.028	1.964	2.306	1.903	2.281	2.384	1.618	2.397	1.911	1.912	2.105	2.055	2.136	2.465	2.281	1.782	2.201	2.06	1.861	2.169	2.01	1.991	1.874	1.8	1.851	2.509	1.862	1.61	1.92	1.674	3.099	2.048	2.951	2.502	2.001	2.295	3.27	2.137	1.969	2.738	3.579	2.243	1.847	1.868	2.009	2.453	2.12
236854_at	LINC00494	3.253	4.082	3.861	3.681	3.52	3.764	4.509	3.571	3.763	4.119	3.373	3.546	3.986	4.436	4.291	4.299	4.413	3.679	3.566	4.882	3.427	4.759	3.901	3.58	3.722	3.514	3.878	3.783	3.642	3.789	3.657	3.916	4.188	2.925	3.299	3.335	3.268	3.393	3.651	3.516	3.159	3.855	4.054	3.553	3.123	3.719	3.571	3.995
1558256_at	LINC00662	2.349	2.495	2.879	2.369	2.392	2.967	2.729	2.816	2.377	2.973	3.028	2.561	2.456	2.24	2.369	2.213	2.533	2.624	2.594	3.083	2.29	2.151	2.577	2.13	2.247	2.729	2.539	2.268	2.953	2.239	2.724	2.398	2.277	2.992	2.71	2.589	2.886	2.886	2.587	2.629	2.336	2.95	2.243	2.333	2.803	2.199	2.589	2.233
242663_at	LINC00662	3.691	3.778	4.037	3.323	3.397	3.974	3.716	3.485	3.058	3.745	4.192	3.17	3.502	3.052	3.414	3.367	2.646	4.564	4.381	3.209	3.638	3.369	3.266	3.413	3.308	4.023	3.482	3.539	3.261	3.303	3.25	3.601	4	3.422	4.72	3.935	4.447	3.565	4.479	3.579	3.087	3.643	3.374	3.129	4.3	4.914	3.631	3.609
1555363_s_at	LINC00663	4.755	4.872	4.943	4.813	5.813	5.685	4.712	5.708	5.638	5.115	4.915	4.461	5.627	5.272	5.038	5.183	4.837	5.019	4.746	5.187	5.044	4.87	5.602	4.619	5.85	5.269	4.515	4.793	4.724	5.189	5.614	5.158	5.223	5.015	3.746	4.797	4.942	4.912	4.585	4.975	4.484	5.327	5.097	4.691	4.648	4.712	5.012	5.427
1560390_s_at	LINC00663	2.537	2.687	2.572	2.528	2.243	2.762	2.502	2.652	2.848	2.648	2.876	2.692	2.39	2.81	2.634	2.758	2.303	2.436	2.42	2.375	2.539	2.447	2.329	2.807	2.49	3.403	2.675	2.338	2.359	3.366	2.743	2.567	2.834	2.377	2.12	2.897	2.448	2.405	2.667	2.454	2.891	2.576	2.773	2.7	2.359	2.423	2.342	2.17
1569318_at	LINC00663	2.754	2.458	3.155	3.056	3.351	3.145	2.49	2.558	2.97	3.011	2.679	2.611	2.582	3.365	2.378	2.989	2.857	3.214	2.707	3.268	2.747	2.842	3.138	2.822	2.686	3.311	2.744	2.765	2.552	3.578	2.899	2.833	3.335	2.975	2.42	2.77	2.539	2.401	2.448	2.743	2.57	2.784	2.559	2.818	2.734	2.806	2.979	2.782
228160_at	LINC00667	4.263	4.487	5.823	5.275	4.915	6.453	5.126	5.859	5.667	5.658	4.922	4.731	4.425	5.047	5.76	4.993	4.712	5.994	4.643	4.589	4.605	5.091	4.391	4.153	4.596	4.119	5.615	5.346	4.888	4.114	4.868	5.46	5.85	4.977	5.209	5.429	5.608	5.248	5.906	5.935	4.624	5.479	4.59	4.724	4.719	5.272	5.216	4.307
243426_at	LINC00667	3.05	3.342	3.87	3.692	3.78	3.844	3.439	3.913	3.481	3.811	4.203	3.821	3.772	3.688	3.059	3.717	3.337	3.215	3.217	3.349	3.482	3.962	3.645	3.561	3.743	4.151	3.463	3.708	3.606	3.671	3.465	3.551	3.495	3.689	3.784	4.547	3.854	4.067	3.624	3.925	4.106	4.477	4.073	3.678	3.728	4.405	3.997	3.181
1559712_at	LINC00689	2.506	2.383	1.983	2.371	2.63	2.082	2.111	2.189	1.934	2.036	2.372	2.793	2.176	2.212	2.538	2.125	2.194	2.202	2.467	2.117	2.273	2.181	1.898	2.687	2.251	2.156	2.124	2.755	2.365	2.231	2.665	2.486	2.494	2.389	2.114	2.319	2.446	2.854	2.397	2.277	2.417	1.93	2.413	1.915	2.215	2.349	2.415	2.403
1563483_at	LINC00869	1.858	2.096	2.353	2.424	2.551	3.041	2.272	2.479	2.178	2.946	2.237	1.785	1.939	1.969	2.187	2.388	2.431	2.415	2.191	1.919	2.192	2.118	2.044	1.724	1.861	3.377	2.41	1.94	2.567	1.832	1.93	2.675	1.863	2.62	4.201	2.233	2.544	3.031	2.807	2.291	1.672	3.275	1.586	2.033	2.823	2.679	2.289	2.533
1560119_at	LINC00937	3.844	3.635	3.616	3.874	3.269	3.717	3.558	3.964	3.295	3.209	3.509	3.36	3.203	3.598	3.166	3.667	3.403	3.445	3.804	3.717	3.51	3.684	3.847	3.857	3.794	4.075	3.743	3.188	3.42	3.972	4.112	3.636	4.073	3.801	3.169	3.599	3.007	3.044	2.696	3.148	3.529	2.696	3.117	3.193	3.584	3.024	2.755	3.095
235497_at	LINC01128	3.059	3.476	3.864	3.34	3.189	3.405	3.638	4.163	3.357	3.571	3.043	3.178	3.277	3.293	3.293	2.909	2.728	3.624	3.015	3.239	3.056	3.088	3.621	3.014	2.777	3.295	3.56	3.428	3.559	3.358	3.474	3.574	2.743	3.164	2.411	3.716	3.013	3.293	3.372	3.062	3.628	4.512	3.138	2.471	3.196	3.53	3.645	3.118
237011_at	LINC01128	2.227	2.064	2.237	2.142	2.22	2.104	2.278	2.413	2.398	2.109	2.199	2.081	2.481	2.219	2.224	1.964	2.642	2.143	2.101	2.358	2.376	2.068	2.098	2.523	2.151	2.378	2.261	2.267	2.495	2.369	2.368	2.474	2.319	2.81	2.148	2.254	2.306	2.203	2.019	2.468	2.655	2.355	1.981	2.38	2.263	2.331	2.012	2.384
1568851_at	LINC01352	4.145	3.64	3.096	3.662	3.153	2.945	3.219	2.917	2.995	2.712	2.928	4.616	3.914	2.894	2.899	2.842	3.286	2.688	3.354	3.767	3.209	3.409	3.866	3.065	3.216	3.369	3.249	3.366	3.48	3.561	3.201	3.186	2.962	2.638	3.145	2.953	2.407	2.982	2.94	2.721	3.137	2.787	3.297	3.352	2.79	2.731	2.391	2.836
1568852_x_at	LINC01352	3.113	2.912	2.654	2.857	2.513	2.56	2.742	2.556	2.307	2.331	2.834	4.093	3.067	2.075	2.835	2.174	3.441	2.33	2.947	2.417	2.612	2.565	2.855	2.274	3.112	2.453	2.461	2.981	2.942	2.473	2.622	3.073	2.45	2.491	2.503	2.391	2.16	2.314	2.414	2.585	3.078	2.296	2.932	2.632	2.904	1.952	1.765	2.641
1564211_at	LINC01550	4.366	5.029	4.334	4.412	4.152	3.535	3.748	4.768	4.116	3.748	4.034	2.948	4.156	4.39	4.538	3.942	3.085	4.103	4.021	3.855	3.148	4.016	4.001	4.001	3.828	4.823	3.885	3.507	3.802	2.899	3.665	4.092	3.803	3.198	3.967	3.788	3.457	3.379	3.511	4.05	3.99	4.77	4.208	3.961	3.684	4.037	4	3.088
236451_at	LINC01806	2.048	2.611	2.032	2.143	2.582	2.726	2.658	2.288	2.595	2.82	2.662	2.206	2.024	2.239	2.698	2.414	2.334	2.374	2.153	2.847	2.174	2.888	2.42	2.252	2.406	2.263	2.533	2.362	2.287	2.783	2.176	2.233	2.263	2.4	2.801	2.698	2.593	2.921	3.17	2.895	2.52	3.8	2.017	2.598	2.331	2.704	3.205	2.286
236598_at	LINC01806	3.151	2.501	2.864	3.129	3.467	3.499	3.125	2.627	3.357	3.299	2.909	3.288	2.661	3.453	3.41	3.981	3.061	2.964	2.767	3.249	3.692	3.467	3.147	3.162	3.145	3.434	2.903	3.137	3.147	3.528	3.073	3.009	3.391	3.239	3.154	3.065	3.451	3.076	3.264	3.358	2.998	3.642	2.957	3.442	3.303	3.474	4.654	3.251
233237_at	LINC01933	1.763	2.184	1.757	1.959	1.866	1.908	1.992	1.615	1.849	1.961	2.134	2.113	1.857	1.815	2.05	2.137	2.046	2.004	1.749	1.825	1.79	1.863	1.815	2.053	1.781	1.699	1.827	1.507	2.074	2.133	2.129	1.97	2.195	1.745	1.992	2.271	2.214	2.224	2.036	2.303	2.195	2.213	2.319	2.2	1.949	2.258	2.035	2.055
233238_s_at	LINC01933	1.92	2.031	1.86	2.073	1.735	2.113	1.507	1.915	1.546	1.913	2.208	2.034	1.78	1.769	1.595	1.649	1.63	1.833	1.815	1.89	1.776	2.151	1.574	1.675	1.651	2.03	1.796	1.999	1.844	1.954	2.024	2.032	1.737	1.637	1.638	2.009	1.841	1.896	1.998	1.683	2.174	1.854	1.945	1.92	1.891	1.927	2.012	1.959
236787_at	LINC01943	3.353	3.355	3.291	2.976	4.34	4.161	3.716	3.293	3.685	3.523	4.019	3.658	3.51	3.243	3.756	3.568	3.886	3.464	3.503	3.886	3.446	4.569	3.841	3.399	3.621	3.784	3.479	3.815	3.151	3.83	3.686	3.757	3.686	3.353	5.288	4.157	4.022	3.619	3.527	4.551	4.377	4.736	3.589	3.836	4.4	4.574	3.394	3.399
1563053_at	LINC02158	3.304	3.693	3.66	3.454	3.438	3.436	4.812	3.031	3.361	3.456	3.138	4.123	3.478	3.212	3.275	3.449	4.254	3.287	4.759	3.553	3.92	4.014	3.714	3.445	3.392	3.467	3.918	3.369	3.74	3.271	4.41	3.869	3.691	4.102	2.988	3.344	2.716	3.455	3.068	3.246	2.989	3.415	3.379	3.597	3.099	2.959	3.514	3.578
220121_at	LINS1	3.692	3.884	3.96	4.498	2.77	4.076	4.135	4.376	4.437	4.189	4.213	3.425	4.132	2.92	3.678	4.345	3.956	4.267	4.131	3.795	3.219	3.355	4.127	4.028	3.249	5.071	3.814	2.338	3.494	3.386	3.088	3.084	3.219	3.522	5.209	3.736	4.612	4.605	5.31	4.24	4.127	4.956	3.951	4.017	3.983	4.971	4.108	4.082
203293_s_at	LMAN1	2.634	2.813	2.78	3.062	2.347	2.898	2.395	3.055	2.791	2.782	2.708	2.211	2.366	2.647	2.865	3.199	2.587	3.105	2.884	2.285	2.243	2.707	2.487	2.346	2.546	2.958	2.302	2.555	2.677	2.464	2.488	2.374	1.983	3.005	2.913	2.756	2.715	2.248	3.717	2.39	2.719	2.359	2.587	2.448	2.591	3.285	2.412	2.356
203294_s_at	LMAN1	2.186	2.39	2.272	2.548	1.881	2.21	2.303	2.353	2.233	2.208	2.351	2.296	2.2	2.473	2.134	2.36	2.215	2.518	2.106	2.315	2.243	2.441	2.297	2.064	2.027	2.365	2.279	2.424	2.064	2.261	2.151	2.01	2.122	2.111	2.219	2.515	2.297	2.467	2.683	2.179	2.218	1.84	2.226	2.16	2.263	2.806	2.015	2.067
222506_at	LMBR1	2.498	2.271	2.458	2.356	2.181	3.233	2.469	2.362	2.268	2.466	2.39	2.508	2.681	2.525	2.376	2.419	2.718	2.565	2.438	2.818	2.545	2.275	2.126	1.924	2.285	2.916	2.49	2.465	2.247	2.305	2.5	2.617	2.138	2.199	2.651	2.597	2.896	2.713	2.837	2.746	2.343	2.845	2.523	2.269	2.317	2.499	2.295	2.427
224036_s_at	LMBR1	2.427	2.523	2.502	2.647	2.538	2.763	2.845	2.564	2.582	2.448	2.653	2.231	2.273	2.393	2.444	2.546	2.781	2.601	2.421	2.425	2.424	2.577	2.064	2.35	2.582	2.736	2.439	2.483	2.402	2.517	2.39	2.812	2.11	2.714	3.085	2.441	2.958	3.071	2.888	3.018	2.722	2.901	2.182	2.305	2.056	2.546	2.514	2.645
224410_s_at	LMBR1	3.978	4.032	4.478	4.238	3.478	4.415	3.624	4.398	4.385	4.134	4.567	3.338	3.999	3.911	4.625	4.262	3.733	4.762	4.163	3.735	3.609	3.584	3.868	3.501	3.679	4.427	4.372	3.794	4.14	3.54	3.723	3.98	3.447	4.128	4.658	4.108	4.162	4.315	4.566	4.075	3.735	4.644	4.138	3.875	4.673	4.395	4.358	3.945
1569872_a_at	LMF1	5.919	6.579	4.875	5.572	5.548	5.46	5.938	6.118	6.674	5.472	4.896	5.155	5.681	6.271	6.543	5.731	5.512	5.342	4.959	5.977	6.001	6.01	5.991	5.971	5.27	4.938	5.728	6.873	5.915	5.432	7.201	5.526	6.518	5.935	4.363	5.425	5.813	5.098	5.157	5.424	4.812	5.376	5.876	5.64	4.086	5.187	6.013	5.496
219135_s_at	LMF1	3.38	3.797	3.266	3.719	3.742	3.29	3.899	3.798	3.701	3.3	3.582	3.825	3.092	3.642	4.028	4.332	3.947	4.113	3.507	4.047	4.033	3.475	3.589	3.808	3.848	3.25	3.61	3.68	3.569	4.571	4.479	3.347	3.599	3.479	3.063	4.276	4.387	3.723	4.334	3.936	4.12	4.3	4.087	4.145	3.754	4.264	4.116	3.365
227984_at	LMF1	4.035	5.514	3.109	4.799	3.312	4.087	4.964	4.7	5.074	4.031	3.778	3.531	4.05	4.523	5.148	4.365	3.746	4.04	2.97	4.135	4.695	4.738	4.218	4.266	3.638	3.386	4.175	5.237	4.438	3.787	5.675	3.761	5.103	4.697	2.155	4.132	4.137	3.642	3.77	3.835	3.308	4.039	4.514	4.222	3.037	3.903	4.925	3.766
46142_at	LMF1	3.132	4.146	3.925	4.152	4.112	3.813	4.689	4.359	4.314	4.073	3.226	3.212	3.622	4.448	4.805	4.421	4.223	4.193	3.923	4.814	4.024	4.514	4.651	4.016	4.646	3.841	4.568	4.3	4.502	4.27	4.677	3.955	4.439	4.892	3.849	3.961	4.106	3.723	4.104	4.369	3.991	4.507	4.391	4.351	4.095	4.135	4.015	3.979
1553284_s_at	LMLN	2.71	2.237	2.297	2.1	1.966	2.447	2.339	1.919	2.235	2.031	2.381	2.783	1.947	2.354	2.238	2.223	2.148	2.021	2.172	2.259	2.378	2.503	2.508	1.921	2.312	2.318	2.603	2.202	2.149	2.752	2.202	2.077	2.083	2.081	1.933	2.128	2.095	2.466	2.515	2.522	2.404	2.171	2.256	2.331	2.243	2.225	2.35	2.512
238037_at	LMLN	2.296	2.341	2.589	2.352	2.933	2.298	2.628	3	2.717	2.7	2.068	2.756	2.712	2.534	2.591	2.642	2.308	2.331	2.662	2.402	2.863	2.597	2.284	2.477	2.633	2.549	2.446	2.76	2.461	2.953	2.311	2.505	2.611	2.861	2.238	2.415	2.332	2.726	2.663	2.106	3.134	2.698	2.549	2.377	2.837	2.319	2.583	3.042
227155_at	LMO4	2.508	2.317	2.869	2.634	2.46	2.266	2.658	3.072	2.523	3.14	2.391	1.983	2.798	2.73	2.561	2.92	2.898	3.103	2.825	2.113	2.461	2.324	2.94	2.748	2.542	2.562	2.4	2.529	2.746	2.433	2.165	2.528	2.826	3.227	3.376	2.869	2.728	1.888	2.694	2.161	2.761	2.301	2.362	2.308	3.117	2.434	2.44	2.285
229537_at	LMO4	2.527	2.519	2.327	2.599	2.243	2.63	2.919	2.568	2.517	2.554	2.448	3.126	2.807	2.488	2.614	2.566	2.465	2.741	2.72	2.925	2.714	2.31	2.846	2.573	2.357	2.787	2.107	2.139	2.504	2.665	2.273	2.566	1.887	2.415	2.291	2.369	2.497	2.796	2.641	2.736	2.451	2.994	2.294	2.606	2.577	2.262	3	2.452
241922_at	LMO4	3.435	2.873	3	3.264	3.005	3.091	2.949	4.065	2.919	2.836	3.228	3.34	3.921	3.598	2.649	3.755	3.044	3.497	3.612	3.253	3.469	2.632	3.113	3.709	4.064	3.229	3.033	3.397	2.926	3.638	2.765	2.406	3.777	3.619	3.745	3.179	3.08	3.011	3.246	2.882	3.567	2.84	2.91	3.433	2.695	3	2.817	3.273
225717_at	LNPK	2.398	2.732	3.205	2.769	2.822	4.245	2.776	2.931	2.905	3.959	3.825	2.486	2.58	2.108	3.202	3.083	3.252	3.128	2.881	2.825	3.007	2.547	2.858	2.007	2.71	3.96	3.029	2.192	2.783	2.304	2.372	3.177	2.098	2.712	4.356	3.36	3.05	3.289	3.845	2.859	2.86	4.271	2.158	2.537	4.019	3.078	3.159	3.098
235171_at	LOC100505501	4.667	4.565	5.687	5.442	5.898	5.439	5.27	5.352	5.501	5.597	4.811	4.592	5.092	4.174	5.228	5.708	4.923	5.859	5.036	5.488	5.242	5.738	5.195	4.371	4.919	5.408	5.012	4.549	4.822	4.37	4.486	5.162	5.071	5.172	7.17	5.879	6.435	4.569	6.515	5.708	5.741	6.394	5.472	4.896	7.112	6.244	6.209	5.279
241534_at	LOC100505549	1.719	2.383	2.668	3.113	2.746	3.177	2.726	2.938	2.383	3.315	2.704	1.649	2.244	2.366	3.078	2.539	2.795	2.953	2.985	2.543	1.99	2.813	2.845	2.155	2.879	3.114	2.699	3.012	2.457	2.074	2.566	3.351	2.287	2.96	3.888	2.817	2.612	3.464	3.31	3.047	2.191	3.438	2.479	2.429	2.639	3.269	3.495	2.74
236958_at	LOC100506473	3.662	4.025	3.413	3.607	3.445	3.277	3.357	3.755	4.032	3.667	3.595	3.011	3.766	3.643	3.716	3.396	3.528	3.845	3.338	3.268	3.457	4.645	3.897	3.737	3.163	3.16	3.812	3.275	3.424	3.842	3.749	3.798	3.777	2.843	3.689	4.23	4.231	4.268	4.311	3.949	3.066	4.252	3.752	3.324	3.619	4.031	3.947	3.955
243699_at	LOC100507006	7.195	7.935	6.323	6.872	6.451	6.073	7.4	7.167	6.166	7.045	6.448	8.155	7.411	7.088	5.932	7.028	7.444	6.714	7.105	6.848	7.72	6.446	6.857	7.735	7.252	6.728	7.423	7.823	6.949	7.03	7.121	6.71	7.167	7.774	6.201	5.942	6.418	5.837	5.434	5.79	7.298	5.137	5.852	6.865	6.046	5.951	5.6	6.855
231250_at	LOC101060400	2.456	2.357	2.277	3.064	2.983	2.265	2.673	2.55	2.508	2.448	2.203	2.33	2.558	2.2	2.655	2.84	2.803	2.07	2.322	2.537	2.846	2.689	2.435	2.443	2.367	2.465	1.954	2.223	2.621	2.584	2.64	2.624	2.512	2.721	2.611	3.177	2.535	2.478	2.717	2.863	2.989	2.818	2.694	2.794	3.105	2.555	2.534	3.346
243441_at	LOC101060400	3.126	2.746	2.668	3.14	3.108	2.913	2.663	2.666	2.672	2.951	2.998	3.131	2.825	2.721	2.969	2.999	3.239	3.085	2.592	2.98	3.005	2.689	3.113	2.95	3.065	2.831	2.511	2.857	2.707	3.351	2.998	3.041	3.108	3.2	4.105	3.256	3.306	3.068	4.248	3.397	3.527	3.471	3.407	3.327	3.581	3.042	2.891	3.204
1556271_at	LOC101928896	3.26	2.663	2.797	2.786	2.739	2.843	2.011	3.059	2.285	2.601	2.394	3.282	2.737	2.346	2.503	2.445	2.221	3.011	2.686	2.48	2.276	2.314	2.907	2.881	2.491	2.735	2.313	2.288	2.528	3.48	2.843	2.733	2.864	2.74	2.841	2.948	2.793	3.157	2.645	3.473	2.66	2.859	3.062	2.942	2.631	2.694	2.746	2.713
230505_at	LOC145474	7.47	6.33	6.257	6.615	6.115	6.3	7.11	6.462	6.128	5.528	5.706	6.737	6.978	5.982	5.994	5.909	6.603	4.923	6.213	6.571	6.11	5.593	6.475	5.756	7.394	6.873	6.041	6.111	7.078	6.477	6.656	6.712	5.998	5.693	4.509	5.264	5.204	5.965	4.496	6.422	5.791	5.506	7.054	6.753	5.679	4.923	5.285	6.049
1556473_at	LOC285097	1.697	2.132	1.964	1.642	1.841	1.825	2.214	1.849	2.064	1.837	1.739	1.832	1.79	1.874	1.861	2.148	1.854	1.998	1.759	1.767	1.403	2.005	2.064	1.702	1.601	1.848	1.97	2.419	1.661	1.882	1.767	1.763	1.903	1.831	1.702	1.77	2.132	2.009	1.946	1.908	1.873	1.888	1.586	1.772	1.932	2.039	2.017	1.801
1556474_a_at	LOC285097	2.113	2.217	2.754	2.355	2.539	2.73	2.209	3.052	2.763	3.569	2.508	2.203	2.382	2.623	2.984	2.539	1.93	2.991	3.117	3.259	2.145	2.799	3.55	2.315	2.242	2.611	2.4	3.494	2.341	2.027	2.753	2.519	2.443	2.625	2.179	3.069	2.711	3.257	3.09	2.662	2.066	2.998	2.249	2.67	2.622	4.122	2.897	2.271
244889_at	LOC400499	6.195	6.488	5.007	6.833	6.788	6.679	7.323	6.329	5.943	6.766	5.136	7.365	7.53	6.614	7.256	6.755	6.465	6.255	6.788	6.265	6.389	6.562	6.099	6.544	6.285	5.319	6.719	6.954	7.256	5.748	7.291	6.589	6.444	7.146	5.902	5.181	6.104	6.861	5.511	4.691	7.23	6.073	6.262	6.636	5.555	5.407	5.696	7.146
1568597_at	LOC646762	3.503	3.317	3.926	3.507	3.487	3.316	3.673	4.277	3.829	3.946	3.287	3.651	3.88	4.577	4.062	3.464	3.992	4.067	3.285	3.431	3.333	3.652	4.316	3.499	3.486	3.484	4.394	3.353	3.836	3.392	3.64	3.806	3.542	4.129	2.578	3.822	3.562	3.492	2.893	3.836	3.24	3.352	3.724	3.401	3.609	3.352	4.012	3.315
226038_at	LONRF1	5.617	5.591	6.445	6.264	6.155	6.792	6.237	6.27	5.908	6.392	6.658	5.067	6.197	5.525	6.407	6.249	6.456	6.213	6.755	6.073	5.961	6.136	6.073	5.066	5.802	6.537	6.216	6.113	6.556	4.905	5.164	6.774	5.144	6.283	6.579	6.078	6.14	7.105	6.383	6.326	5.566	6.302	4.638	5.508	6.475	6.31	6.406	6.267
218589_at	LPAR6	4.916	6.763	6.238	7.203	6.628	8.137	6.2	7.266	6.639	8.11	7.96	5.577	7.388	6.649	7.198	7.186	6.847	7.349	7.177	6.856	7.689	6.953	6.539	6.811	7.638	7.632	7.394	6.966	6.232	6.913	6.459	7.634	5.968	7.634	8.502	7.14	7.844	8.112	8.036	7.72	6.729	8.226	5.876	7.036	6.773	7.81	8.013	7.102
212272_at	LPIN1	2.754	2.466	3.019	2.889	2.695	2.625	2.58	2.931	3.145	2.826	3.41	2.902	2.628	3.24	2.799	3.334	2.801	3.252	3.237	2.829	2.79	2.884	2.761	2.555	2.989	3.324	3.087	2.761	2.758	2.758	2.877	2.462	2.269	3.207	3.249	3.414	3.628	2.789	3.507	2.607	3.168	2.948	3.234	2.661	2.907	3.326	2.544	2.813
214936_at	LRCH1	2.768	2.41	3.693	3.644	2.275	2.376	2.742	2.958	2.679	2.631	2.617	2.605	3.607	2.289	2.417	2.962	2.755	2.462	2.647	2.614	2.784	2.731	3.39	2.724	2.712	2.603	2.569	2.646	2.62	3.903	2.709	2.941	2.732	3.138	2.332	2.824	3.369	2.641	2.233	3.192	2.469	3.092	2.318	3.001	2.938	2.557	2.938	3.033
225060_at	LRP11	2.518	2.827	3.261	2.658	2.859	3.151	3.264	2.671	2.47	2.943	2.696	2.382	2.794	2.462	2.448	2.452	3.065	3.068	2.518	2.866	2.806	2.734	2.53	2.527	2.624	2.927	2.809	2.52	2.724	2.883	3.099	2.535	3.215	2.657	3.307	3.53	3.421	3.124	3.185	3.039	1.959	3.223	2.151	2.499	2.482	3.216	3.104	3.031
228955_at	LRP8	3.21	4.157	4.223	4.221	3.93	4.428	4.014	4.313	3.802	4.341	3.667	3.069	3.563	3.439	4.108	4.166	3.89	4.001	3.802	4.04	3.72	3.953	4.062	3.26	3.958	4.081	4.057	4.143	4.037	3.466	3.382	3.771	3.551	3.519	4.562	4.063	4.157	4.177	4.106	4.722	3.888	4.449	3.979	3.639	4.645	4.278	4.639	4.241
212976_at	LRRC8B	2.175	2.426	2.876	2.381	2.527	3.976	2.504	2.648	2.92	3.401	2.998	2.406	2.966	2.413	3.132	2.435	1.774	3.112	3.006	2.406	3.121	2.64	2.289	2.299	2.528	3.897	3.32	2.346	2.285	2.144	2.081	3.499	2.135	2.246	2.617	3.096	2.565	4.083	2.694	2.682	2.743	3.659	2.491	2.539	2.985	3.341	3.209	2.587
231872_at	LRRCC1	1.909	2.36	2.278	1.998	2.265	2.451	2.136	2.171	2.356	2.281	2.667	2.083	1.988	2.088	2.178	2.041	2.103	2.058	2.159	1.972	2.573	2.216	1.966	2.122	2.268	1.866	1.92	2.199	2.216	2.137	2.075	2.455	2.279	2.29	3.023	2.602	3.034	3.074	2.679	2.63	2.336	2.679	1.811	2.34	2.131	2.339	2.343	1.983
209840_s_at	LRRN3	7.813	8.697	7.552	6.911	8.4	8.817	7.364	8.892	9.383	8.945	8.076	7.64	7.585	8.321	7.985	7.882	6.472	8.327	7.312	7.908	7.629	7.952	7.433	8.601	7.498	8.633	6.836	8.652	7.637	7.522	7.988	8.108	9.294	8.957	5.306	7.898	6.881	7.55	5.864	7.206	5.823	8.396	6.672	7.741	5.082	7.734	7.694	7.711
209841_s_at	LRRN3	6.703	7.813	6.814	6.108	7.293	8.29	6.588	7.798	8.135	8.086	7.074	5.922	6.467	6.953	7.246	6.664	5.651	7.369	6.436	6.984	6.63	7.405	6.549	7.242	5.984	7.834	5.984	7.645	6.789	5.891	6.903	7.586	7.8	7.696	4.959	7.168	5.961	7.272	4.781	6.541	4.527	7.817	4.893	6.628	4.207	6.965	7.315	6.885
216388_s_at	LTB4R	7.437	6.089	5.844	6.04	5.168	5.484	5.532	5.486	6.049	5.689	6.033	7.607	6.095	5.751	6.121	5.435	6.787	5.56	6.026	5.712	6.56	5.306	6.064	5.997	6.14	6.003	6.623	6.236	6.142	6.286	6.598	6.183	6.023	6.035	4.874	5.888	5.286	5.665	4.898	4.857	6.61	5.416	6.675	6.236	5.598	5.298	5.206	5.946
219922_s_at	LTBP3	6.181	6.587	5.942	6.146	5.901	6.223	6.306	6.687	7.106	6.703	5.839	6.432	6.479	6.582	6.762	6.333	6.124	7.133	5.965	6.414	6.446	6.218	6.761	6.442	6.767	6.208	6.159	6.778	6.068	7.197	7.56	5.456	7.08	6.045	4.415	6.211	6.618	5.658	6.341	6.378	5.475	6.405	6.391	6.136	5.585	6.293	6.275	5.957
232819_s_at	LTBR	3.629	3.778	3.195	3.441	3.465	2.998	3.282	2.856	3.551	3.031	3.743	4.384	3.188	3.205	3.402	3.32	3.43	3.244	2.904	3.523	3.646	3.306	3.157	3.599	2.953	2.847	3.237	3.427	3.434	4.175	3.757	4.01	3.57	2.913	2.991	3.832	3.622	3.815	3.269	3.697	3.711	3.328	4.079	3.723	3.48	3.523	3.49	3.521
233818_at	LTN1	2.644	2.641	2.084	2.877	2.454	2.13	2.416	2.479	2.6	2.226	2.54	3.183	2.939	2.626	2.422	2.617	2.711	2.64	2.644	2.303	2.517	2.479	2.38	2.596	2.711	2.423	2.388	2.464	2.246	2.562	2.181	1.956	2.503	3.073	2.333	2.195	2.485	1.948	1.973	2.09	2.825	2.075	2.541	2.508	2.437	2.438	2.138	2.145
233819_s_at	LTN1	5.694	6.296	5.754	7.149	6.117	6.307	6.561	7.145	6.629	6.665	5.879	6.234	7.162	7.556	5.817	7.006	7.244	7.149	7.196	6.462	6.906	5.481	5.466	6.624	7.129	6.154	5.759	6.736	5.934	6.029	5.093	5.821	7.08	7.182	7.385	5.467	6.729	4.261	6.777	4.141	6.573	4.48	4.454	6.822	4.686	6.009	5.07	6.802
229193_at	LUC7L3	4.786	7.014	6.18	6.882	5.79	5.136	6.065	6.874	4.908	6.35	6.138	6.037	6.336	6.439	6.11	5.78	5.032	6.28	6.561	4.551	4.361	5.914	4.221	5.733	6.445	6.034	5.808	6.38	4.699	5.549	3.918	4.691	6.17	5.135	4.84	4.985	4.229	4.26	5.051	2.033	6.379	4.86	3.113	5.564	6.317	4.383	2.898	5.598
215679_at	LUNAR1	4.184	4.173	4.06	5.111	4.192	4.407	5.056	4.415	3.723	4.007	4.155	4.083	3.698	4.344	4.748	3.781	4.304	4.006	4.445	4.099	3.854	4.337	4.116	4.47	4.71	3.784	4.017	3.917	3.995	4.173	4.695	4.057	4.801	3.817	3.368	3.83	3.426	3.654	3.547	4.013	3.681	4.237	4.268	4.179	4.183	3.718	3.579	3.687
239960_x_at	LYRM7	3.284	3.555	3.875	3.517	3.998	3.986	4.033	4.161	3.503	4.536	3.995	2.745	4.122	3.2	3.847	3.28	3.458	3.466	3.717	3.569	2.915	3.933	3.864	3.07	3.289	4.449	3.543	3.317	3.732	2.645	3.457	4.918	3.307	3.77	4.478	3.601	2.925	4.314	3.726	3.709	3.113	4.874	2.898	3.566	3.927	3.912	4.041	3.274
210943_s_at	LYST	8.799	7.412	7.672	8.888	6.323	6.07	7.006	8.452	5.92	7.057	7.396	8.761	8.388	8.99	5.196	8.639	6.962	7.705	9.043	6.911	8.227	5.675	6.51	7.9	8.895	8.006	6.871	8.406	6.616	7.188	5.992	6.204	8.288	8.291	7.625	7.301	7.015	5.492	6.647	4.972	8.389	5.256	5.531	7.831	7.214	6.243	5.086	7.457
215415_s_at	LYST	5.03	4.694	4.779	5.53	3.258	4.146	4.21	4.834	4.444	4.16	4.586	5.241	4.927	5.186	4.128	4.924	4.834	4.209	4.861	4.221	4.502	3.754	3.955	4.244	5.237	5.185	3.964	4.526	4.118	4.515	3.91	4.276	4.371	4.809	4.279	4.248	4.513	3.614	3.601	3.655	4.903	3.499	4.853	4.753	4.674	4.239	3.736	4.129
208116_s_at	MAN1A1	4.199	3.249	5.279	5.209	4.716	4.54	4.474	4.315	4.189	4.886	4.865	5.063	4.982	5.113	4.944	4.699	4.337	4.987	5.235	3.985	4.216	4.47	3.606	3.66	3.467	4.405	4.231	3.936	4.486	3.414	3.477	4.072	3.558	3.73	5.493	4.969	5.37	5.597	5.535	4.314	4.076	4.279	4.256	5.223	4.722	6.173	4.66	5.255
235103_at	MAN2A1	5.656	6.354	6.218	6.825	5.598	6.439	5.686	7.034	6.259	6.974	6.539	5.208	6.938	6.413	6.452	6.639	5.599	6.971	6.754	5.491	6.209	5.403	5.889	5.431	6.142	6.521	6.513	6.059	6.06	5.479	4.741	6.231	5.362	6.279	7.067	6.47	6.676	6.057	6.939	6.284	5.802	6.5	4.948	5.867	6.4	6.564	6.197	6.285
226132_s_at	MANEAL	3.379	3.85	4.066	3.79	3.512	3.591	3.15	3.713	3.724	3.641	3.573	3.687	3.744	3.4	4.247	3.873	3.875	4.049	3.419	3.311	3.511	4.005	3.613	3.922	3.38	3.751	3.708	4.095	3.48	3.834	3.786	3.832	3.465	3.662	4.606	3.945	4.243	3.353	4.424	4.039	3.745	4.367	3.85	3.824	4.774	4.15	4.169	3.852
1565131_x_at	MAP3K2	1.901	1.991	2.026	1.973	1.979	1.949	2.158	1.828	2.098	1.74	2.118	1.925	1.751	1.969	1.742	1.973	2.046	1.7	1.851	1.854	1.875	1.933	1.829	1.868	2.012	2.215	1.613	1.879	2.067	1.904	1.849	1.571	1.907	2.007	1.657	2.092	1.939	1.547	1.778	1.694	2.543	2.002	2.157	1.936	1.861	2.019	1.771	1.929
221695_s_at	MAP3K2	6.425	5.78	5.936	6.751	4.613	4.544	5.119	6.121	5.5	6.005	5.837	5.833	5.682	6.388	5.529	6.239	6.193	6.13	6.682	5.075	5.921	4.597	5.082	5.494	5.669	5.996	5.627	6.483	6.125	3.852	3.611	5.106	5.506	6.386	6.028	5.499	5.266	4.777	5.816	3.493	6.111	4.483	4.851	5.813	5.272	5.306	3.445	5.327
226441_at	MAP3K2	6.924	6.689	6.81	7.25	6.758	8.075	6.671	6.709	6.134	7.546	7.594	5.939	7.27	6.482	6.951	6.807	7.379	6.637	7.431	6.76	7.032	6.562	6.532	5.96	6.793	7.881	7.277	6.915	7.146	5.892	5.859	7.798	5.579	6.964	7.56	6.732	6.636	7.288	6.914	6.666	6.194	7.37	5.054	6.562	6.983	6.62	7.099	7.026
235011_at	MAP3K2	5.021	5.567	4.729	5.861	5.002	4.913	4.723	5.548	5.079	5.648	4.878	4.293	5.377	5.086	4.766	5.082	5.534	5.665	5.684	4.023	5.098	3.777	4.231	4.903	4.779	5.004	5.546	5.025	4.892	3.709	3.493	4.336	4.554	5.469	4.978	3.757	4.886	4.292	5.533	3.78	5.013	4.045	4.528	5.105	4.576	4.42	4.123	5.454
243505_at	MAP3K3	7.491	6.301	6.802	7.013	4.028	5.156	6.134	7.001	5.307	5.775	6.157	7.444	7.314	6.953	5.947	6.187	6.477	6.069	6.924	4.868	5.763	4.502	5.866	6.613	6.726	7.015	5.957	6.309	6.288	6.114	5.579	5.256	6.496	5.877	5.318	5.784	5.731	5.051	5.159	4.69	6.736	4.673	5.708	5.656	6.367	5.025	4.64	5.415
218311_at	MAP4K3	2.438	2.519	3.437	3.345	2.705	4.416	2.318	3.758	2.588	4.335	4.766	2.234	3.184	2.817	3.478	2.954	3.558	3.858	4.071	3.093	3.055	3.043	2.933	2.274	3.156	3.982	3.257	2.652	2.971	2.679	2.327	4.28	2.194	3.162	4.564	3.355	3.628	4.458	4.505	3.347	2.563	4.973	2.01	3.116	3.783	3.632	4.308	3.521
220145_at	MAP9	2.215	2.359	2.801	3.97	2.945	3.206	2.546	3.288	2.578	3.166	2.525	2.907	2.793	2.778	2.72	3.311	2.201	3.373	3.104	2.609	2.985	2.685	2.519	2.436	2.622	2.798	2.756	2.633	2.721	2.991	2.453	2.693	2.577	3.332	3.902	2.965	3.178	2.399	4.065	2.688	2.919	2.828	2.28	2.605	2.669	2.997	2.916	2.739
228423_at	MAP9	2.556	3.014	3.957	4.405	3.609	4.819	3.527	4.109	3.604	4.741	4.845	2.503	3.56	3.527	3.882	3.963	3.94	4.515	4.035	3.583	3.734	3.902	3.792	2.594	3.514	4.641	3.568	3.238	3.273	3.47	2.964	4.04	2.883	4.88	5.455	4.091	4.649	4.406	5.491	4.75	3.284	5.651	2.736	3.017	4.031	4.648	4.894	3.248
239415_at	MAP9	3.862	3.612	4.549	4.694	4.102	4.046	3.88	4.184	3.565	4.25	4.172	3.668	4.39	4.303	3.452	4.285	3.549	3.805	4.139	3.435	3.748	3.715	3.698	3.897	3.779	4.213	3.805	4.201	3.843	3.689	3.565	3.19	4.102	4.708	4.511	4	4.584	3.496	4.89	4.701	4.187	3.775	3.653	4.102	3.584	4.23	3.636	3.974
229847_at	MAPK1	4.528	3.937	3.994	3.948	3.717	3.961	3.938	3.682	3.971	3.701	3.845	4.038	3.546	4.269	4.307	3.9	4.29	3.675	4.045	3.285	3.556	3.882	3.966	3.992	3.907	4.089	3.838	3.609	4.276	4.069	3.671	4.342	3.891	3.627	4.116	3.2	3.926	3.698	3.46	3.812	4.179	3.691	4.171	4.227	4.049	4.517	3.853	3.95
210671_x_at	MAPK8	2.379	2.483	2.28	2.601	2.494	2.434	2.574	2.928	2.287	2.801	2.518	2.689	2.632	2.867	2.355	2.49	2.516	2.472	2.863	2.441	3.126	2.31	2.645	2.647	2.121	2.642	2.515	2.593	2.653	2.559	2.538	2.509	2.612	2.454	2.541	2.654	2.523	2.593	2.538	2.215	2.285	1.934	1.978	2.197	2.324	2.52	2.537	2.556
226046_at	MAPK8	4.906	4.408	4.15	4.251	4.315	4.691	4.49	4.223	4.829	4.658	5.377	3.597	4.649	4.398	4.714	4.896	4.768	5.422	5.046	4.736	4.874	4.429	4.824	4.2	4.338	5.514	4.881	4.572	4.731	4.357	4.293	4.908	3.485	4.482	4.957	4.769	5.039	4.941	4.963	4.905	3.894	5.959	4.462	4.404	4.68	4.607	5.1	4.56
201668_x_at	MARCKS	5.619	5.707	5.092	6.389	4.98	4.21	4.811	5.075	4.063	4.991	4.873	6.321	5.952	5.543	4.586	4.836	4.672	5.126	5.905	4.127	5.389	4.062	3.804	5.239	4.066	5.106	5.925	5.265	5.24	5.408	5.02	3.872	5.18	5.142	4.348	5.086	5.595	4.587	5.541	4.475	5.544	4.59	4.324	5.32	4.798	4.587	4.134	5.228
213002_at	MARCKS	7.445	6.828	7.208	7.497	7.612	7.195	7.264	7.038	5.895	6.691	6.399	6.77	7.289	6.753	6.437	6.259	6.959	6.122	7.252	6.458	5.914	6.14	5.868	6.669	5.773	6.686	6.944	6.269	7.154	5.097	5.83	7.529	5.864	7.211	6.746	6.726	6.623	6.515	6.623	5.424	6.408	5.498	5.136	6.215	6.711	6.451	5.617	7.041
225897_at	MARCKS	6.894	7.145	7.892	8.125	7.319	8.056	6.946	7.368	6.391	8.089	7.878	6.676	7.855	6.918	7.269	6.887	7.576	7.381	7.986	6.778	7.414	6.555	6.534	6.469	6.742	7.87	8.365	6.894	7.679	5.902	6.424	7.489	4.963	7.972	7.756	7.083	7.431	8.02	7.677	7.45	6.704	7.764	6.073	6.42	8.04	7.118	7.506	7.67
232537_x_at	MARK3	4.657	4.266	4.566	4.631	4.215	3.793	4.878	4.554	3.574	3.939	3.533	4.158	4.053	4.553	4.315	4.418	4.352	3.74	5.087	4.278	4.134	4.111	4.585	4.052	4.989	4.994	3.551	4.172	4.549	4.278	3.984	4.549	5.218	4.493	4.114	3.543	3.88	3.281	3.897	3.587	4.209	4.336	4.091	3.828	4.118	3.31	3.702	4.013
228468_at	MASTL	3.027	3.59	4.746	4.608	3.423	5.225	3.379	4.152	4.36	3.582	3.735	2.883	3.616	3.747	4.495	3.897	3.84	4.74	4.167	3.787	3.818	4.254	3.714	3.65	3.842	3.843	4.105	4.295	4.021	2.098	3.359	4.382	3.347	4.312	4.652	3.888	4.664	4.437	4.496	4.381	3.967	5.715	3.686	4.036	4.97	4.401	4.947	4.018
209331_s_at	MAX	5.882	5.461	6.322	5.979	6.244	5.859	6.174	5.883	5.538	5.402	6.941	5.814	5.678	5.469	6.606	5.756	6.787	5.556	6.496	6.253	5.593	6.754	6.083	6.226	5.885	6.153	5.388	5.513	7.191	5.842	7.143	6.487	5.92	7.055	5.569	6.558	6.305	7.118	5.635	6.812	6.711	6.996	7.439	6.733	6.351	6.001	6.531	5.501
243552_at	MBTD1	4.556	5.912	5.79	6.519	5.871	5.514	5.796	6.647	5.92	6.115	5.297	4.906	6.505	6.995	5.576	7.005	6.442	5.928	6.553	6.262	6.307	5.584	5.593	5.743	7.287	5.318	5.541	6.473	5.38	5.73	4.408	5.538	5.987	6.084	6.419	5.026	5.301	4.116	5.697	4.064	5.761	4.786	4.026	5.479	5.212	5.723	4.599	6.118
1560033_at	MCCC2	2.069	2.413	2.362	2.418	2.171	2.277	2.438	2.407	1.941	1.893	2.2	2.157	2.332	2.386	2.071	2.856	2.092	2.049	2.134	2.186	2.09	2.508	2.186	2.174	2.236	2.213	2.569	1.845	1.859	2.428	2.078	1.805	2.67	1.84	2.294	1.934	2.115	1.938	2.217	2.071	2.329	1.929	2.094	2.204	2.659	2.057	1.815	2.266
226238_at	MCEE	3.821	4.075	4.068	4.562	4.247	5.754	4.086	4.132	4.238	5.085	4.783	3.539	4.008	3.671	5.268	4.526	4.289	4.56	3.941	4.293	4.959	4.408	4.616	4.377	4.471	5.22	4.285	4.642	3.942	3.909	4.031	4.408	3.871	3.752	5.25	4.363	4.878	4.793	5.391	5.045	4.68	5.203	4.03	4.044	3.872	5.221	5.072	3.838
1560542_at	MCM3AP-AS1	1.986	2.224	1.922	1.717	2.074	2.376	1.826	2.048	2.151	1.78	1.972	2.392	1.877	1.826	1.861	1.937	1.888	1.888	1.844	2.009	2.027	2.303	1.631	1.953	1.808	1.943	1.943	2.338	1.881	1.9	1.785	2.064	2.524	2.068	1.93	1.81	2.094	1.895	1.946	1.786	1.724	1.874	1.753	1.844	1.93	1.778	1.662	1.847
220459_at	MCM3AP-AS1	4.064	4.61	4.626	4.259	4.349	5.052	4.433	4.838	4.064	5.188	4.666	4.418	4.286	4.951	4.458	4.938	3.992	5.165	4.208	4.349	4.338	4.339	3.98	4.356	4.192	4.664	4.41	4.374	4.23	4.453	3.973	4.371	4.786	4.638	6.189	4.857	5.185	4.321	4.728	4.433	5.025	5.699	3.875	3.957	5.401	5.182	5.029	3.923
232740_at	MCM3AP-AS1	3.802	4.72	4.699	5.68	4.884	5.099	4.811	5.685	4.92	5.205	4.246	4.575	4.741	4.658	4.976	4.655	4.682	4.708	4.451	4.797	3.885	4.905	5.25	4.766	4.345	6.045	4.413	4.321	4.508	4.551	4.06	5.034	5.211	4.994	5.712	5.047	5.064	4.231	4.051	4.905	4.674	6.285	4.662	4.626	5.593	5.347	4.836	4.714
1554730_at	MCTP1	5.686	5.769	5.343	6.338	4.968	5.134	5.399	6.263	4.926	4.965	5.428	5.765	6.427	5.225	4.987	5.361	5.627	5.153	5.931	4.84	5.373	4.93	5.142	5.606	5.878	5.432	5.82	5.436	5.621	4.994	4.627	5.654	5.594	5.714	5.215	4.592	5.342	5.131	5.005	4.722	6.015	4.246	5.013	5.501	4.885	4.594	4.561	5.574
220122_at	MCTP1	8.109	7.145	7.968	7.549	8.242	8.271	7.287	5.533	6.384	7.312	6.102	8.053	8.767	4.406	7.722	7.081	8.301	8	8.493	4.987	8.361	7.64	7.678	6.559	7.773	5.73	7.374	5.258	5.736	6.749	4.681	6.047	7.377	7.196	7.262	6.876	7.731	7.982	8.175	5.511	8.044	7.332	7.952	5.755	8.072	7.521	8.213	8.303
235740_at	MCTP1	4.791	4.938	4.872	5.71	5.289	6.004	4.926	5.126	4.072	5.469	5.872	4.795	5.59	4.464	4.947	4.734	5.756	5.33	5.738	4.865	5.282	4.723	4.784	3.971	5.229	5.542	5.66	5.15	5.823	4.375	4.681	6.23	2.851	4.907	6.375	4.969	5.375	6.9	5.956	5.856	4.777	5.693	4.189	5.101	5.546	5.162	6.288	5.577
205385_at	MDM2	2.453	2.096	2.39	2.355	2.505	2.687	2.614	2.648	2.208	2.146	2.599	2.605	2.269	2.47	2.406	2.212	2.586	2.441	2.371	2.595	2.597	2.412	2.49	2.429	2.404	2.361	2.33	2.681	2.231	2.931	2.692	2.443	2.748	2.554	2.707	2.944	2.815	2.92	2.794	2.542	3.031	2.699	2.638	2.69	2.316	2.703	2.793	2.633
205386_s_at	MDM2	2.223	1.824	1.803	1.806	1.5	1.958	2.29	1.865	1.904	2.046	2.138	2.447	1.894	1.88	1.671	2.153	1.877	1.9	2.137	1.917	1.759	1.704	2.167	2.079	2.199	1.934	1.678	1.917	2.4	2.006	2.016	2.124	1.901	2.362	1.997	1.854	1.751	1.962	1.712	1.917	1.73	1.83	2.311	1.965	2.016	1.698	1.571	2.107
211832_s_at	MDM2	2.062	1.885	1.736	2.058	1.846	1.848	1.748	1.637	2.019	2.061	1.81	1.955	1.866	2.313	1.974	2.394	2.101	2.243	1.982	2.042	1.987	2.056	2.004	2.236	1.884	2.071	1.834	1.963	1.973	1.863	2.144	1.728	2.218	1.766	2.114	2.011	2.095	1.728	1.755	1.828	2.404	1.983	2.116	2.025	1.946	1.913	1.975	2.085
217373_x_at	MDM2	2.964	2.753	2.922	2.747	2.266	1.995	2.186	2.45	2.511	2.722	2.714	3.234	2.609	3.238	2.27	2.362	2.505	2.492	2.603	2.184	2.346	2.714	2.287	2.252	2.357	2.562	2.527	2.53	2.502	2.976	2.726	2.382	2.952	2.651	2.387	2.61	3.214	2.511	2.881	2.665	3.149	2.221	2.262	2.606	2.606	2.655	2.518	2.837
237891_at	MDM2	1.854	1.922	1.882	2.256	1.972	1.739	1.768	1.9	1.854	1.795	1.982	2.034	1.932	1.672	1.907	1.962	2.143	1.888	2.042	1.629	1.645	1.62	1.811	1.93	1.8	1.696	1.958	1.792	1.554	2.004	1.706	2.017	2.203	2.029	1.85	1.839	1.775	1.749	1.711	1.529	2.336	1.91	1.845	1.564	1.798	1.789	1.568	1.788
205655_at	MDM4	3.487	2.247	3.131	3.08	1.996	3.092	2.708	2.535	2.915	2.894	2.923	3.006	2.7	2.696	2.538	2.846	2.637	3.072	2.943	2.246	2.382	2.358	2.319	2.449	3.001	3.738	2.744	3.156	2.712	2.34	2.496	2.657	2.635	3.247	2.876	2.752	2.538	2.699	2.889	2.138	2.835	2.922	2.698	2.675	2.87	3.079	2.318	2.162
225742_at	MDM4	6.938	5.897	6.503	6.18	4.735	4.97	4.484	6.485	5.382	5.734	5.821	6.3	6.051	6.162	4.89	6.243	5.574	6.169	6.468	4.635	5.396	4.817	5.317	6.142	5.974	6.333	5.64	5.859	5.44	5.671	4.713	5.343	6.324	5.936	5.064	6.015	6.031	4.702	5.785	4.171	6.144	5.055	4.797	5.188	6.178	5.626	3.988	4.709
241876_at	MDM4	5.635	4.895	4.836	5.207	4.349	3.728	4.357	5.581	4.343	4.953	4.335	5.538	5.543	5.747	3.984	4.839	3.389	4.85	5	3.449	4.865	4.007	4.402	5.246	5.356	5.411	4.561	5.208	4.504	5.358	4.712	3.982	5.532	5.027	3.974	4.166	4.657	3.821	4.419	3.681	5.133	4.272	4.431	5.008	4.994	4.565	3.568	4.666
1569484_s_at	MDN1	4.207	4.677	4.776	4.36	4.223	3.948	5.18	5.112	4.588	3.927	3.593	3.381	4.322	4.339	4.19	4.302	4.452	3.724	4.132	4.772	4.294	3.989	4.364	4.35	5.198	5.309	3.426	3.843	3.818	4.836	4.271	3.838	5.299	4.444	3.596	3.606	3.812	3.085	3.23	3.827	4.164	4.317	4.191	4.035	3.963	3.438	3.925	3.841
1553508_at	MDS2	3.115	3.385	3.121	3.101	2.919	3.468	3.143	4.229	4.003	3.714	3.41	3.215	3.415	3.751	4.202	3.187	3.389	3.291	3.329	3.601	3.262	3.068	3.805	4.022	3.735	3.224	3.571	3.456	3.303	3.169	3.603	2.856	4.312	3.301	3.036	3.406	3.195	3.8	3.259	3.188	2.853	3.477	3.63	3.553	3.238	3.91	3.534	3.316
1562731_s_at	MDS2	6.184	6.242	5.862	5.848	5.745	6.358	5.925	6.794	6.86	6.236	5.599	4.929	6.2	6.361	6.755	6.176	5.552	5.794	6.009	6.255	5.846	5.952	6.389	6.516	5.958	6.174	5.759	6.462	5.666	6.15	6.321	5.319	6.415	5.832	4.563	5.4	5.169	6.189	4.387	5.899	4.74	5.628	6.058	5.578	4.532	6.154	6.149	5.903
233423_at	MEAK7	4.063	3.096	3.741	3.621	3.408	3.783	3.012	4.163	3.522	3.838	3.443	3.967	3.946	3.767	3.703	4.3	3.427	3.495	3.973	3.836	3.399	3.475	3.727	3.775	4.369	3.695	3.131	3.263	3.342	4.527	3.444	3.703	4.349	3.925	3.531	3.641	2.712	3.094	3.081	2.984	4.345	2.865	3.542	3.028	4.03	3.331	2.902	3.151
65438_at	MEAK7	2.774	2.708	3.293	3.128	2.368	2.871	3.128	2.907	2.376	2.726	2.343	2.556	3.308	2.576	2.608	2.739	2.582	2.801	2.377	2.578	2.042	2.297	2.483	2.444	2.822	3.129	2.684	2.836	2.651	2.568	2.933	2.767	2.964	3.116	2.354	2.336	2.454	2.204	2.976	2.483	3.294	2.885	3.08	2.678	2.966	2.642	2.571	2.561
203496_s_at	MED1	4.524	4.504	4.29	5.296	4.27	3.523	4.519	5.656	4.435	4.372	4.203	4.89	5.115	6.179	4.2	5.857	4.782	5.092	5.468	4.674	5.455	3.803	4.301	5.105	6.223	4.663	4.111	4.755	3.805	4.53	4.251	4.048	5.513	5.658	5.651	4.561	4.626	3.946	4.408	4.286	4.877	3.847	3.92	4.784	4.141	4.353	3.574	4.692
242911_at	MED13L	5.256	5.16	4.662	6.16	4.233	3.763	4.807	5.902	4.521	5.057	4.739	5.96	5.758	5.943	4.209	5.238	4.476	4.956	5.775	4.168	4.678	3.922	3.973	5.076	5.357	4.847	4.093	5.72	4.612	4.762	4.384	4.633	5.607	4.95	4.272	4.137	4.308	4.255	4.257	4.111	5.642	4.11	4.003	5.152	4.565	4.145	3.927	4.559
215897_at	MED25	1.783	2.017	2.126	1.867	2.023	1.709	2.082	2.128	2.09	1.923	2.062	2.196	1.847	1.939	2.162	1.804	1.969	1.981	1.977	1.895	2.024	1.873	2.458	1.814	1.858	1.704	2.211	2.023	2.129	2.103	2.01	1.993	2.204	2.119	1.887	1.771	2.159	1.846	2.367	1.777	2.031	1.71	1.781	1.868	2.098	2.32	1.786	1.958
208262_x_at	MEFV	3.876	3.882	3.6	3.514	4.015	3.765	4.853	3.437	3.832	3.81	3.646	4.114	3.272	4.013	3.389	3.752	4.609	3.489	4.143	3.664	3.993	3.593	3.753	3.756	4.002	3.279	4.252	3.844	4.049	3.426	3.439	3.905	4.304	4.615	3.473	3.428	3.421	3.331	3.329	3.368	4.068	3.477	3.774	4.138	3.777	3.32	3.457	4.292
226869_at	MEGF6	6.612	7.171	5.436	7.079	6.427	6.275	6.389	6.875	6.566	6.411	4.901	6.955	6.632	6.82	7.116	6.316	7.256	6.535	6.72	7.468	6.708	6.456	7.343	5.874	6.622	5.62	6.215	6.954	7.169	5.128	7.145	6.523	6.761	5.8	5.362	5.343	6.064	5.214	5.483	4.961	5.89	6.049	6.141	6.701	5.263	6.179	6.218	5.802
203510_at	MET	1.95	1.717	2.081	1.921	2.128	2.068	1.766	1.937	1.861	1.745	2.067	1.78	1.858	2	1.926	1.835	1.874	2.024	1.998	1.954	2.022	1.638	2.016	2.163	1.681	1.964	2.204	1.963	1.638	2.166	1.936	1.986	1.983	1.797	2.088	2.394	2.095	2.319	2.157	1.989	2.158	2.254	2.098	2.05	1.903	2.482	2.21	2.202
202015_x_at	METAP2	1.398	1.86	1.723	1.694	2.291	1.586	1.635	1.665	1.521	1.881	1.371	1.47	1.422	1.52	1.467	1.741	1.637	1.59	1.843	1.585	1.745	1.674	1.549	1.568	1.477	1.391	1.448	1.807	1.642	1.395	1.254	1.819	1.795	2.112	1.884	1.486	1.635	1.707	1.733	1.364	1.59	1.637	1.446	1.523	1.592	1.855	1.555	1.688
227993_at	METAP2	3.653	3.81	4.528	4.645	4.788	5.648	3.575	5.03	4.664	5.339	5.374	4.217	4.599	3.943	5.089	4.624	4.288	5.124	4.486	4.871	5.072	4.764	4.65	4.373	4.956	5.627	4.624	4.152	4.246	4.799	4.139	5.082	4.369	4.098	5.339	4.832	5.003	5.33	5.59	5.232	4.461	6.045	4.303	4.564	5.068	5.608	5.326	4.634
236060_at	METTL14	3.249	2.632	3.066	3.141	3.042	2.843	3.368	2.481	2.713	2.549	3.07	3.085	2.899	3.102	3.17	3.021	2.761	2.396	2.668	2.873	3.208	3.086	2.806	2.72	2.968	3.573	2.909	2.629	2.839	2.876	3.092	2.876	3.076	2.975	2.578	2.593	2.723	2.556	2.794	2.486	2.935	3.001	2.634	2.582	2.618	2.756	2.632	2.368
213528_at	METTL18	3.694	3.993	3.232	3.705	4.536	6.514	4.105	4.324	4.117	5.318	4.344	3.547	4.316	3.948	4.321	4.872	4.737	4.564	4.505	4.313	5.203	4.278	3.921	3.541	4.398	5.076	3.69	4.495	3.208	4.046	3.427	4.427	4.539	3.954	5.874	4.641	5.155	4.885	5.434	4.815	4.079	5.796	3.583	4.53	3.99	5.535	5.851	4.163
232194_at	METTL4	3.992	4.547	4.937	4.851	4.861	5.796	4.46	5.058	4.614	5.688	5.509	4.214	5.233	4.18	4.939	4.91	5.078	5.264	4.618	4.695	4.712	4.59	5.156	4.105	4.727	5.547	5.277	4.65	5.046	4.657	4.398	5.522	4.447	4.915	5.675	5.161	5.461	5.577	5.396	5.349	4.195	6.056	3.997	4.606	5.405	5.785	5.618	4.949
1556874_a_at	MEX3C	2.366	2.288	2.276	2.277	2.097	2.461	2.062	2.123	2.26	2.448	2.348	2.114	2.333	2.118	2.247	1.815	2.393	2.498	1.997	2.324	2.047	2.065	2.206	2.11	1.823	2.173	2.253	1.763	2.102	2.501	2.097	1.862	2.058	1.743	2.466	2.652	2.261	2.227	2.026	2.177	2.06	2.062	2.663	2.514	2.39	2.467	1.934	2.58
218247_s_at	MEX3C	5.396	5.775	7.13	6.357	6.126	6.982	5.975	6.643	5.879	7.332	6.791	4.579	5.982	5.797	6.246	6.579	6.143	7.135	6.45	6.25	6.129	6.568	6.133	5.279	5.81	7.28	6.541	5.927	5.974	5.398	5.209	6.688	5.717	6.29	7.861	6.97	6.885	6.067	7.518	6.526	5.501	7.236	4.718	5.58	7.416	6.956	6.734	6.219
227275_at	MEX3C	2.688	2.687	2.482	2.43	2.575	2.394	2.337	2.952	2.621	2.718	2.16	2.577	2.891	2.856	2.451	2.856	2.481	2.814	2.63	3.143	2.647	2.406	2.668	2.748	2.885	2.833	2.719	2.733	2.961	2.774	2.724	2.524	2.838	2.167	2.376	2.909	2.568	2.727	2.423	2.659	2.23	2.376	3.092	2.331	2.957	3.339	2.865	3.434
213457_at	MFHAS1	6.155	6.822	6.068	7.55	6.896	5.477	7.311	7.706	6.861	6.46	6.401	5.93	7.297	6.452	6.065	6.12	5.139	6.31	6.479	6.44	6.32	6.71	6.512	6.547	5.095	6.262	5.918	6.59	5.99	6.014	6.194	6.5	7.253	6.306	6.044	6.593	5.551	5.316	5.432	5.802	5.701	5.51	5.861	6.877	6.134	7.151	5.894	7.16
206522_at	MGAM	10.442	9.364	8.977	10.433	8.762	9.233	9.689	8.657	8.77	8.15	8.504	9.163	9.826	8.57	8.945	8.258	10.357	7.878	9.749	8.401	8.677	8.142	7.996	8.538	8.202	8.542	9.286	9.112	9.961	7.017	8.42	9.8	8.019	8.817	8.198	8.654	7.257	9.42	7.575	7.531	8.608	7.372	8.666	8.621	8.455	6.715	7.474	9.123
1569136_at	MGAT4A	2.239	2.521	2.825	2.49	3.161	4.207	2.405	3.168	2.896	2.654	2.357	1.924	2.464	2.207	2.437	2.75	2.76	2.514	2.488	2.186	2.429	2.551	2.629	2.339	2.486	3.514	1.894	2.502	2.316	2.209	2.331	2.401	2.64	2.486	2.75	2.459	2.295	3.085	2.343	2.778	2.27	3.765	2.395	2.231	2.431	3.469	3.585	2.248
219797_at	MGAT4A	4.166	3.769	4.114	4.718	3.941	4.804	3.735	4.583	4.182	4.505	4.991	3.902	3.986	3.808	4.605	4.809	4.332	4.615	4.287	4.099	4.631	4.168	4.06	3.872	4.206	4.875	4.463	4.154	4.364	3.519	4.05	4.368	3.695	4.273	4.817	3.921	4.704	4.77	4.989	4.46	3.764	4.943	3.838	4.218	4.76	4.775	4.565	4.125
1560148_at	MIA3	1.727	2.499	1.838	1.836	2.175	2.173	1.595	1.796	1.755	1.851	1.802	2.153	1.793	2.024	2.298	2.06	2.001	1.937	2.022	2.18	1.989	2.063	2.362	1.901	1.786	1.72	2.021	2.042	1.883	2.268	1.79	1.735	2.061	2.04	1.928	2.213	2.03	1.852	1.97	2.296	1.794	2.319	2.057	1.959	1.829	1.928	2.081	1.917
212310_at	MIA3	3.473	4.545	4.609	4.24	4.008	4.913	4.325	4.689	4.64	4.718	4.523	2.61	4.158	3.67	4.709	4.225	4.484	4.433	4.529	3.774	4.213	3.92	4.058	3.433	4.324	4.896	4.338	4.475	4.271	3.83	3.961	5.18	3.346	4.531	5.038	4.151	4.346	4.909	4.659	4.591	3.708	5.316	3.312	4.027	4.354	4.617	5.004	4.459
224720_at	MIB1	5.651	6.086	6.847	6.514	6.16	7.35	6.096	6.628	5.658	7.278	7.451	4.887	6.683	5.851	6.038	6.65	6.661	7.112	6.545	5.953	6.755	5.973	5.697	5.504	6.21	7.194	6.789	6.442	6.137	5.822	5.468	6.883	5.01	6.395	7.531	6.797	6.704	6.847	7.176	6.571	6.068	7.363	4.376	5.908	6.952	6.971	6.835	6.403
224722_at	MIB1	3.673	4.392	5.172	4.334	4.57	5.718	3.903	4.553	4.009	5.439	5.908	3.827	5.015	3.442	4.406	4.229	4.654	4.542	4.47	4.649	4.172	4.408	4.417	2.861	4.28	5.676	4.553	4.338	4.289	4.247	3.609	4.908	3.573	4.744	5.491	4.547	4.705	4.672	4.712	4.735	3.696	5.592	3.445	4.1	5.115	4.765	5.053	4.722
224725_at	MIB1	3.842	4.128	4.811	4.329	3.713	5.476	4.299	4.306	3.382	5.338	5.068	3.13	4.382	3.455	4.636	4.435	4.812	4.557	4.779	3.418	4.55	3.547	3.941	2.202	4.159	5.352	4.573	3.421	4.512	3.66	2.794	5.182	2.467	4.294	5.366	4.602	4.569	4.975	4.857	4.263	3.697	5.32	3.035	4.165	4.466	4.343	4.996	4.366
212715_s_at	MICAL3	4.11	4.676	3.881	5.092	4.672	4.447	5.17	4.302	5.022	4.689	3.73	3.687	4.898	4.691	4.596	4.307	4.709	4.564	4.746	4.551	3.813	4.906	4.708	4.538	5.176	4.479	4.535	4.862	4.196	4.802	4.393	4.145	4.166	4.803	3.737	3.572	4.063	3.831	4.405	4.346	3.58	4.912	4.843	4.373	4.148	4.584	4.199	4.461
229474_at	MICAL3	3.437	2.85	3.026	2.441	2.859	2.907	2.912	2.75	2.92	3.129	3.089	3.437	2.966	2.812	3.064	2.807	2.795	2.397	2.467	3.317	2.871	2.905	3.032	3.286	2.899	2.745	2.733	2.331	2.841	3.167	3.164	2.402	2.865	2.777	3.256	3.138	2.894	3.556	2.892	3.204	3.206	3.255	3.249	3.096	2.816	3.133	3.517	2.735
231985_at	MICAL3	3.395	3.627	3.783	4.286	3.571	3.488	3.693	4.516	3.505	3.758	3.705	3.087	4.048	4.272	3.687	3.469	3.294	3.707	4.087	3.73	3.092	3.619	4.115	3.511	4.135	4.287	3.621	4.12	3.469	3.696	3.302	2.802	4.248	4.132	2.695	3.092	3.024	2.727	3.734	3.295	2.681	3.613	3.838	3.184	3.292	3.288	3.304	3.548
227398_s_at	MIDN	1.946	2.412	1.85	2.133	2.247	2.026	2.135	1.88	2.17	2.273	2.488	2.061	1.92	2.043	1.87	1.899	2.188	1.96	1.59	2.069	1.853	2.386	1.894	1.93	1.63	1.746	2.17	2.013	1.819	2.115	2.328	1.823	1.957	2.196	2.032	1.879	1.973	2.072	2.131	1.925	2.698	2.032	2.164	1.973	1.782	1.867	1.929	1.899
231072_at	MIDN	2.663	2.196	2.255	1.929	2.025	2.118	2.469	2.089	2.25	1.857	2.094	2.165	2.238	2.455	2.485	2.136	2.097	2.074	2.196	2.291	2.479	2.594	1.982	2.533	2.164	2.182	2.145	2.346	2.633	2.362	2.168	2.356	2.093	2.689	2.403	2.058	2.158	2.083	1.946	2.049	1.833	2.234	2.361	2.278	2.505	2.377	2.081	2.626
1556316_s_at	MIF-AS1	3.947	3.847	4.144	3.941	4.598	4.046	4.733	4.149	4.279	3.864	4.766	3.712	4.13	4.193	3.606	3.378	4.109	3.539	3.867	3.877	3.473	4.2	4.215	4.278	3.852	4.013	3.41	3.45	4.362	3.555	4.326	4.046	5.298	3.633	3.843	4.248	4.501	3.931	4.422	3.996	3.989	3.917	3.841	4.036	4.867	3.53	3.692	3.662
1554509_a_at	MINDY3	3.188	3.188	3.251	3.311	3.198	4.01	2.424	3.619	3.227	3.729	3.431	3.227	3.287	2.889	3.556	3.097	3.484	3.556	3.602	2.997	3.148	3.589	3.308	3.213	3.08	3.039	3.669	3.145	3.284	2.748	3.079	3.446	2.868	3.04	4.261	3.41	3.446	3.834	3.589	3.594	2.957	3.745	3.005	2.843	3.326	3.957	3.835	3.457
218297_at	MINDY3	4.912	4.849	4.976	5.121	5.017	5.755	4.823	5.075	4.831	5.657	5.913	4.279	5.105	4.828	5.129	5.062	5.257	5.429	5.396	5.173	5.123	4.753	4.847	4.749	4.94	5.264	5.502	4.773	5.219	4.379	4.097	5.37	4.424	5.378	6.136	5.378	5.854	5.646	5.762	5.488	4.656	6.389	4.171	4.867	5.688	5.431	5.815	5.303
209585_s_at	MINPP1	5.222	5.024	5.906	5.378	5.716	5.967	5.471	5.936	5.163	6.363	5.855	4.554	5.376	5.193	5.844	5.545	6.108	5.905	5.325	4.989	4.97	5.646	5.686	4.851	5.03	6.417	5.553	5.07	5.16	4.505	4.574	5.656	4.192	5.546	6.457	5.894	5.666	6.192	6.152	5.805	5.992	6.577	5.37	5.355	6.281	6.097	6.041	5.986
217544_at	MIR3916	2.658	2.989	3.388	3.502	3.136	4.176	2.693	3.418	2.951	3.798	3.769	3.032	2.883	2.794	3.596	3.57	3.308	3.293	3.394	2.995	2.825	3.023	2.753	2.861	3.03	3.279	3.731	2.502	3.19	2.559	2.464	3.232	2.973	3.274	3.843	3.345	3.83	3.354	4.667	2.995	3.292	3.468	2.615	3.161	3.84	4.144	3.02	3.167
1557293_at	MIR570HG	5.45	5.467	6.865	5.408	4.887	4.958	6.123	5.426	6.19	4.263	5.634	4.775	6.278	6.102	5.212	4.398	5.642	4.885	6.61	6.033	5.993	5.541	6.537	3.267	6.021	6.571	6.108	5.902	5.84	4.978	5.904	6.115	6.505	6.438	4.432	4.696	4.05	5.343	3.816	4.614	4.915	5.227	5.371	3.965	4.346	5.241	4.286	5.943
229820_at	MIR570HG	3.854	4.2	4.356	3.788	4.28	3.857	5.12	4.116	4.654	3.688	3.77	4.533	4.789	3.957	4.392	3.844	4.596	3.624	5.36	4.269	4.819	5.329	5.139	4.271	4.687	3.576	4.615	5.061	4.921	4.723	4.765	4.846	4.635	4.675	3.735	3.947	3.604	4.233	3.891	4.897	4.314	4.063	4.801	3.864	4.029	4.002	3.997	4.947
236846_at	MIR646HG	7.985	6.434	6.294	5.851	4.886	5.481	5.547	6.714	4.694	4.472	5.665	6.37	6.671	5.609	5.75	5.464	6.44	5.387	5.377	6.673	5.764	3.549	6.297	5.626	6.837	6.386	6.009	6.522	6.577	6.453	6.842	6.908	5.631	5.095	3.613	3.949	5.48	4.876	4.963	4.077	6.162	5.566	6.204	6.216	5.14	4.329	3.98	4.515
206500_s_at	MIS18BP1	5.624	6.763	5.574	6.742	5.193	5.278	6.018	7.127	5.46	7.472	5.444	5.456	6.572	7.077	4.767	6.936	6.295	7.274	7.899	5.638	7.041	4.279	5.278	6.543	7.251	4.897	6.116	6.593	5.401	3.822	3.827	5.273	6.358	7.069	7.862	5.601	6.306	4.695	6.382	3.961	6.543	3.833	2.891	6.082	4.822	5.81	4.119	5.947
226630_at	MIS18BP1	5.603	6.004	6.576	6.352	5.546	6.798	5.722	6.689	5.941	6.976	6.534	4.435	6.327	5.147	6.342	6.328	6.381	6.651	6.961	5.862	6.522	5.468	6.252	4.881	6.162	6.54	6.672	5.913	6.256	5.347	5.496	6.317	5.298	6.431	7.584	6.274	6.808	6.821	6.997	6.057	5.823	6.697	4.876	5.672	6.645	6.565	6.216	5.979
[truncated: 1,319 more rows]
[truncated: 40 more columns]
